# Supplementary material for: Presynaptic PTPσ regulates postsynaptic NMDA receptor function through direct adhesion-independent mechanisms
Source: eLife. 2020 Mar 6;9:e54224. doi: 10.7554/eLife.54224 (PMC7069723; doi:10.7554/eLife.54224)
Supplement: Supplementary file 2. [file elife-54224-supp2.xlsx]

## Sheet: Phosphoscan_Raw_Detail
IBS PTMSCAN® RESULTS
Table #1: Mouse Cells; Trypsin Digest; Phosphotyrosine pY-1000 Motif Antibody #8803
Samples: WT1 = CS 29537, 29538; KO1 = CS 29539, 29540; WT2 = CS 29541, 29542; KO2 = CS 29543, 29544; WT3 = CS 29545, 29546; KO3 = CS 29547, 29548
Legend: * - phosphorylation, # - oxidized methionine, § - known site, Blue Text - CST antibody available, Bold Intensity = manually reviewed values, Red intensity = multiple identifications for one m/z.
																MS2 Spectrum Number												Retention Time												XCorr
Index	Index in Detail	Protein Type	Gene Name	Protein Name	Site	Description	Accession	URL	kD	-7/+7 peptide	Upstream Kinase	Downstream Target	Peptide	Charge	Calc. m/z	WT1 (CS29537)	WT1 (CS29538)	KO1 (CS29539)	KO1 (CS29540)	WT2 (CS29541)	WT2 (CS29542)	KO2 (CS29543)	KO2 (CS29544)	WT3 (CS29545)	WT3 (CS29546)	KO3 (CS29547)	KO3 (CS29548)	WT1 (CS29537)	WT1 (CS29538)	KO1 (CS29539)	KO1 (CS29540)	WT2 (CS29541)	WT2 (CS29542)	KO2 (CS29543)	KO2 (CS29544)	WT3 (CS29545)	WT3 (CS29546)	KO3 (CS29547)	KO3 (CS29548)	WT1 (CS29537)	WT1 (CS29538)	KO1 (CS29539)	KO1 (CS29540)	WT2 (CS29541)	WT2 (CS29542)	KO2 (CS29543)	KO2 (CS29544)	WT3 (CS29545)	WT3 (CS29546)
1	Actin-binding
2	1	Actin-binding	Cap2	CAP2	286	Adenylyl cyclase-associated protein 2	Q9CYT6	http://www.phosphosite.org/proteinAction.do?id=14239&showAllSites=true	52.8	HVTDDKKtYKNPSLR			HVTDDKKT*YKNPSLR	4	471.236	4367	4628	4139	4320	4406	4253	4075			4133		4114	19.9331	20.2708	19.9875	20.5083	20.4122	20.0815	20.3554			19.764		20.3155	3.2621	3.2714	2.0501	3.2597	1.9838	4.235	1.9684			1.3201
3	2	Actin-binding	Cap2	CAP2	287	Adenylyl cyclase-associated protein 2	Q9CYT6	http://www.phosphosite.org/proteinAction.do?id=14239&showAllSites=true	52.8	VTDDKKTyKNPSLRA			HVTDDKKTY*KNPSLR	3	627.979		4642				4263								20.3094				20.1077								1.084				1.5781
4	3	Actin-binding	Cap2	CAP2	287	Adenylyl cyclase-associated protein 2	Q9CYT6	http://www.phosphosite.org/proteinAction.do?id=14239&showAllSites=true	52.8	VTDDKKTyKNPSLRA			HVTDDKKTY*KNPSLR	4	471.236								4208												19.9577												2.0434
5	4	Actin-binding	Hpca;Hpcal1	HPCA;HPCAL1	58;58	Neuron-specific calcium-binding protein hippocalcin	P84075;P62748	http://www.phosphosite.org/proteinAction.do?id=13024&showAllSites=true	22.4	IYANFFPyGDASKFA			IYANFFPY*GDASK	2	786.842		26372	25839	25907		26207			25997		26149	25794		78.7713	79.0554	78.834		78.834			78.8913		78.8828	78.7796		2.6621	1.3962	2.0717		2.3635			2.4625
6	5	Actin-binding	Hpca;Hpcal1	HPCA;HPCAL1	58;58	Neuron-specific calcium-binding protein hippocalcin	P84075;P62748	http://www.phosphosite.org/proteinAction.do?id=13024&showAllSites=true	22.4	IYANFFPyGDASKFA			IYANFFPY*GDASKFAEHVFR	3	820.379		31022	30624	30543	31012		30512	30778	30764	30823	30884			91.2256	91.9712	91.2868	91.8922		91.7926	91.4531	91.6936	91.5723	91.652			3.6619	2.6792	3.7656	3.9324		3.6049	3.2812	3.4949	3.3491
7	6	Actin-binding	Hpca;Hpcal1	HPCA;HPCAL1	58;58	Neuron-specific calcium-binding protein hippocalcin	P84075;P62748	http://www.phosphosite.org/proteinAction.do?id=13024&showAllSites=true	22.4	IYANFFPyGDASKFA			KIYANFFPY*GDASKFAEHVFR	4	647.56												28022												84.7788
8	7	Actin-binding	Nebl	NEBL iso2	249	LIM zinc-binding domain-containing Nebulette	Q9DC07	http://www.phosphosite.org/proteinAction.do?id=7650001&showAllSites=true	31.1	PIDDGWMyGTVQRTG			DGDYIVNVQPIDDGWMY*GTVQR	3	874.384	31810	32482	31654	31987		32310	31679	32126	31975	32122	32100	31791	94.9233	95.1613	94.8017	95.165		95.1446	94.9366	95.0631	94.9533	95.0639	94.9353	94.8816	2.9346	4.7289	3.5862	4.926		5.0263	4.601	4.848	4.5345	4.5656
9	8	Actin-binding	Nebl	NEBL iso2	249	LIM zinc-binding domain-containing Nebulette	Q9DC07	http://www.phosphosite.org/proteinAction.do?id=7650001&showAllSites=true	31.1	PIDDGWMyGTVQRTG			DGDYIVNVQPIDDGWMY*GTVQR	3	874.384	31839												95.0017												2.0429
10	9	Actin-binding	Wdr1	WDR1	§238	WD repeat-containing protein 1	O88342	http://www.phosphosite.org/proteinAction.do?id=4288&showAllSites=true	66.4	KAHDGGIyAISWSPD			AHDGGIY*AISWSPDSTHLLSASGDK	3	889.069		25605									25451			76.6996									77.0173			3.4618
11	10	Actin-binding	Wdr1	WDR1	§238	WD repeat-containing protein 1	O88342	http://www.phosphosite.org/proteinAction.do?id=4288&showAllSites=true	66.4	KAHDGGIyAISWSPD			AHDGGIY*AISWSPDSTHLLSASGDKTSK	3	994.461	23255	23398		22974	23385				23121		23263	22888	71.7318	70.8134		70.9691	71.4468				71.197		71.1615	71.0098	2.0476	5.3375		3.5998	3.8559				1.9516
12	11	Actin-binding	Wdr1	WDR1	§238	WD repeat-containing protein 1	O88342	http://www.phosphosite.org/proteinAction.do?id=4288&showAllSites=true	66.4	KAHDGGIyAISWSPD			AHDGGIY*AISWSPDSTHLLSASGDKTSK	4	746.097	23234	23371	23028	22937	23377	23223	22884	23121	23097	23145	23240	22867	71.6681	70.7418	71.4617	70.8712	71.4255	70.8672	71.2936	70.9432	71.1352	71.0126	71.0991	70.9526	5.3732	7.7575	6.4996	7.7155	6.6153	8.3886	6.8382	7.9582	7.2172	6.9912
13	12	Actin-binding	Wdr1	WDR1	§72	WD repeat-containing protein 1	O88342	http://www.phosphosite.org/proteinAction.do?id=4288&showAllSites=true	66.4	KYAPSGFyIASGDIS			YAPSGFY*IASGDISGK	2	856.882		25232	24608							24920	24973			75.7104	75.7465							75.7563	75.7365			1.1615	2.2831							2.1977
14	13	Actin-binding	Wdr1	WDR1	298	WD repeat-containing protein 1	O88342	http://www.phosphosite.org/proteinAction.do?id=4288&showAllSites=true	66.4	HLLSISLsGYINYLD			DHLLSISLS*GYINYLDKNNPSKPLR	4	735.127	27245												82.5011												2.8733
15	14	Actin-binding	Wdr1	WDR1	300	WD repeat-containing protein 1	O88342	http://www.phosphosite.org/proteinAction.do?id=4288&showAllSites=true	66.4	LSISLSGyINYLDKN			DHLLSISLSGY*INYLDKNNPSKPLR	4	735.127		27384	27005		27390	27252		27143	27139		27262	26900		81.4828	82.1953		82.1889	81.6385		81.7132	81.9537		81.8626	81.7273		5.7582	4.7648		4.5438	5.9066		5.1241	5.8261
16	Adaptor/scaffold
17	15	Adaptor/scaffold	Abi1;Abi1	Abi-1 iso4;Abi-1 iso4	276;276	Abl interactor 1	Q8CBW3-2;Q8CBW3-4	http://www.phosphosite.org/proteinAction.do?id=17598900&showAllSites=true	48.5	APGAAPGsQYGTMTR			ENSGSSSIGIPIAVPTPSPPTAGPAPGAAPGS*QYGTMTR	3	1253.6		29705												87.6941												2.1877
18	16	Adaptor/scaffold	Abi1;Abi1	Abi-1;Abi-1 iso4	282;277	Abl interactor 1	Q8CBW3;Q8CBW3-3	http://www.phosphosite.org/proteinAction.do?id=3348&showAllSites=true	52.3	APGAAPGsQYGTMTR			ENSGSSSIGIPIAVPTPSPPTAGPAAPGAAPGS*QYGTMTR	4	958.208												29134												87.7534
19	17	Adaptor/scaffold	Abi1;Abi1;Abi1;Abi1;Abi1	Abi-1;Abi-1 iso4;Abi-1 iso4;Abi-1 iso4;Abi-1 iso4	§198;193;193;193;193	Abl interactor 1	Q8CBW3;Q8CBW3-2;Q8CBW3-3;Q8CBW3-4;Q8CBW3-5	http://www.phosphosite.org/proteinAction.do?id=3348&showAllSites=true	52.3	TLGRNTPyKTLEPVK			NTPY*KTLEPVKPPTVPNDYM#TSPAR	3	971.468			18286		18627			18497				18157			58.6592		58.6731			58.5104				58.3454			2.1789		1.9577			1.6569
20	18	Adaptor/scaffold	Abi1;Abi1;Abi1;Abi1;Abi1	Abi-1;Abi-1 iso4;Abi-1 iso4;Abi-1 iso4;Abi-1 iso4	§198;193;193;193;193	Abl interactor 1	Q8CBW3;Q8CBW3-2;Q8CBW3-3;Q8CBW3-4;Q8CBW3-5	http://www.phosphosite.org/proteinAction.do?id=3348&showAllSites=true	52.3	TLGRNTPyKTLEPVK			NTPY*KTLEPVKPPTVPNDYMTSPAR	3	966.137		20910	20482	20500		20759	20337	20643	20624	20659	20735	20509		64.1472	64.5801	64.3011		64.29	64.4645	64.2908	64.4904	64.3466	64.3422	64.6122		3.8256	2.6571	3.3787		4.3129	2.7435	2.7423	2.7841	3.8563
21	19	Adaptor/scaffold	Abi1;Abi1;Abi1;Abi1;Abi1	Abi-1;Abi-1 iso4;Abi-1 iso4;Abi-1 iso4;Abi-1 iso4	§198;193;193;193;193	Abl interactor 1	Q8CBW3;Q8CBW3-2;Q8CBW3-3;Q8CBW3-4;Q8CBW3-5	http://www.phosphosite.org/proteinAction.do?id=3348&showAllSites=true	52.3	TLGRNTPyKTLEPVK			NTPY*KTLEPVKPPTVPNDYMTSPAR	3	966.137		20916					20388	20635		20638		20346		64.1655					64.5996	64.2693		64.292		64.1785		4.1376					2.8254	3.1453		3.6046
22	20	Adaptor/scaffold	Abi1;Abi1;Abi1;Abi1;Abi1	Abi-1;Abi-1 iso4;Abi-1 iso4;Abi-1 iso4;Abi-1 iso4	§198;193;193;193;193	Abl interactor 1	Q8CBW3;Q8CBW3-2;Q8CBW3-3;Q8CBW3-4;Q8CBW3-5	http://www.phosphosite.org/proteinAction.do?id=3348&showAllSites=true	52.3	TLGRNTPyKTLEPVK			NTPY*KTLEPVKPPTVPNDYMTSPAR	4	724.854		20956												64.276												5.431
23	21	Adaptor/scaffold	Abi1;Abi1;Abi1;Abi1;Abi1	Abi-1;Abi-1 iso4;Abi-1 iso4;Abi-1 iso4;Abi-1 iso4	§200, §216;195, 211;195, 211;195, 211;195, 211	Abl interactor 1	Q8CBW3;Q8CBW3-2;Q8CBW3-3;Q8CBW3-4;Q8CBW3-5	http://www.phosphosite.org/proteinAction.do?id=3348&showAllSites=true	52.3	GRNTPYKtLEPVKPP;VPNDYMTsPARLGSQ			NTPYKT*LEPVKPPTVPNDYMTS*PAR	3	992.792											20778												64.4581
24	22	Adaptor/scaffold	Abi1;Abi1;Abi1;Abi1;Abi1	Abi-1;Abi-1 iso4;Abi-1 iso4;Abi-1 iso4;Abi-1 iso4	§200;195;195;195;195	Abl interactor 1	Q8CBW3;Q8CBW3-2;Q8CBW3-3;Q8CBW3-4;Q8CBW3-5	http://www.phosphosite.org/proteinAction.do?id=3348&showAllSites=true	52.3	GRNTPYKtLEPVKPP			NTPYKT*LEPVKPPTVPNDYM#TSPAR	3	971.468		18723		18278										58.2848		58.3351										2.0484		2.662
25	23	Adaptor/scaffold	Abi1;Abi1;Abi1;Abi1;Abi1	Abi-1;Abi-1 iso4;Abi-1 iso4;Abi-1 iso4;Abi-1 iso4	§200;195;195;195;195	Abl interactor 1	Q8CBW3;Q8CBW3-2;Q8CBW3-3;Q8CBW3-4;Q8CBW3-5	http://www.phosphosite.org/proteinAction.do?id=3348&showAllSites=true	52.3	GRNTPYKtLEPVKPP			NTPYKT*LEPVKPPTVPNDYM#TSPAR	4	728.853		18741												58.3368												3.4904
26	24	Adaptor/scaffold	Abi1;Abi1;Abi1;Abi1;Abi1	Abi-1;Abi-1 iso4;Abi-1 iso4;Abi-1 iso4;Abi-1 iso4	§200;195;195;195;195	Abl interactor 1	Q8CBW3;Q8CBW3-2;Q8CBW3-3;Q8CBW3-4;Q8CBW3-5	http://www.phosphosite.org/proteinAction.do?id=3348&showAllSites=true	52.3	GRNTPYKtLEPVKPP			NTPYKT*LEPVKPPTVPNDYMTSPAR	3	966.137	20682		20526		20823	20675							64.7245		64.6992		64.5581	64.0689							1.482		2.8102		3.1952	2.833
27	25	Adaptor/scaffold	Abi1;Abi1;Abi1;Abi1;Abi1	Abi-1;Abi-1 iso4;Abi-1 iso4;Abi-1 iso4;Abi-1 iso4	§213;208;208;208;208	Abl interactor 1	Q8CBW3;Q8CBW3-2;Q8CBW3-3;Q8CBW3-4;Q8CBW3-5	http://www.phosphosite.org/proteinAction.do?id=3348&showAllSites=true	52.3	PPTVPNDyMTSPARL	Abl	Abl	TLEPVKPPTVPNDY*M#TSPAR	3	770.368		18402		17940	18298			18111	17985	18049		17838		57.4359		57.4353	57.7956			57.4798	57.4397	57.3592		57.4878		3.3396		3.1889	2.8566			2.8871	3.2673	3.4852
28	26	Adaptor/scaffold	Abi1;Abi1;Abi1;Abi1;Abi1	Abi-1;Abi-1 iso4;Abi-1 iso4;Abi-1 iso4;Abi-1 iso4	§213;208;208;208;208	Abl interactor 1	Q8CBW3;Q8CBW3-2;Q8CBW3-3;Q8CBW3-4;Q8CBW3-5	http://www.phosphosite.org/proteinAction.do?id=3348&showAllSites=true	52.3	PPTVPNDyMTSPARL	Abl	Abl	TLEPVKPPTVPNDY*MTSPAR	3	765.036	20866	20944	20480	20616		20776	20403	20675	20660	20677	20706	20376	65.2191	64.2443	64.5753	64.6166		64.3349	64.6396	64.3735	64.5853	64.3942	64.2656	64.2589	3.9341	4.171	2.3389	4.3571		3.9654	3.4982	3.9042	4.3939	3.9488
29	27	Adaptor/scaffold	Abi1;Abi1;Abi1;Abi1;Abi1	Abi-1;Abi-1 iso4;Abi-1 iso4;Abi-1 iso4;Abi-1 iso4	§213;208;208;208;208	Abl interactor 1	Q8CBW3;Q8CBW3-2;Q8CBW3-3;Q8CBW3-4;Q8CBW3-5	http://www.phosphosite.org/proteinAction.do?id=3348&showAllSites=true	52.3	PPTVPNDyMTSPARL	Abl	Abl	TLEPVKPPTVPNDY*MTSPAR	3	765.036				20516			20476				20744	20360				64.3438			64.8326				64.3659	64.2164				3.4175			3.697
30	28	Adaptor/scaffold	Abi1;Abi1;Abi1;Abi1;Abi1	Abi-1;Abi-1 iso4;Abi-1 iso4;Abi-1 iso4;Abi-1 iso4	§213;208;208;208;208	Abl interactor 1	Q8CBW3;Q8CBW3-2;Q8CBW3-3;Q8CBW3-4;Q8CBW3-5	http://www.phosphosite.org/proteinAction.do?id=3348&showAllSites=true	52.3	PPTVPNDyMTSPARL	Abl	Abl	TLEPVKPPTVPNDY*MTSPAR	3	765.036											20952	20563											64.9183	64.7533
31	29	Adaptor/scaffold	Abi1;Abi1;Abi1;Abi1;Abi1	Abi-1;Abi-1 iso4;Abi-1 iso4;Abi-1 iso4;Abi-1 iso4	§215;210;210;210;210	Abl interactor 1	Q8CBW3;Q8CBW3-2;Q8CBW3-3;Q8CBW3-4;Q8CBW3-5	http://www.phosphosite.org/proteinAction.do?id=3348&showAllSites=true	52.3	TVPNDYMtSPARLGS			TLEPVKPPTVPNDYM#T*SPAR	3	770.368											18192												57.5121
32	30	Adaptor/scaffold	Abi1;Abi1;Abi1;Abi1;Abi1	Abi-1;Abi-1 iso4;Abi-1 iso4;Abi-1 iso4;Abi-1 iso4	§215;210;210;210;210	Abl interactor 1	Q8CBW3;Q8CBW3-2;Q8CBW3-3;Q8CBW3-4;Q8CBW3-5	http://www.phosphosite.org/proteinAction.do?id=3348&showAllSites=true	52.3	TVPNDYMtSPARLGS			TLEPVKPPTVPNDYMT*SPAR	3	765.036		21152			20850									64.8102			64.63									3.1635			3.3785
33	31	Adaptor/scaffold	Abi1;Abi1;Abi1;Abi1;Abi1	Abi-1;Abi-1 iso4;Abi-1 iso4;Abi-1 iso4;Abi-1 iso4	§23;23;23;23;23	Abl interactor 1	Q8CBW3;Q8CBW3-2;Q8CBW3-3;Q8CBW3-4;Q8CBW3-5	http://www.phosphosite.org/proteinAction.do?id=3348&showAllSites=true	52.3	KRALIESyQNLTRVA			ALIESY*QNLTR	2	694.335		19283	18759	18828		19089	18652	18986	18926	18979	19068	18721		59.7956	59.9284	59.8164		59.8184	59.9611	59.8472	59.9573	59.8563	59.8772	59.8524		3.1699	2.8772	3.2387		3.1767	3.0698	3.2161	2.6623	3.0196
34	32	Adaptor/scaffold	Abi1;Abi1;Abi1;Abi1;Abi1	Abi-1;Abi-1 iso4;Abi-1 iso4;Abi-1 iso4;Abi-1 iso4	§428;393;423;422;335	Abl interactor 1	Q8CBW3;Q8CBW3-2;Q8CBW3-3;Q8CBW3-4;Q8CBW3-5	http://www.phosphosite.org/proteinAction.do?id=3348&showAllSites=true	52.3	IEKVVAIyDYTKDKD	Abl	Abl	VVAIY*DYTKDKDDELSFK	3	743.684	22438	22576	22181	22126	22525	22411	22064	22322	22295	22325	22447	22081	69.4871	68.6129	69.1677	68.6821	69.1264	68.6961	69.1027	68.8041	68.9889	68.8238	68.9509	68.8459	4.1929	4.7297	3.5878	4.7612	4.8518	4.5053	4.9095	4.2168	5.1265	4.0452
35	33	Adaptor/scaffold	Abi1;Abi1;Abi1;Abi1;Abi1	Abi-1;Abi-1 iso4;Abi-1 iso4;Abi-1 iso4;Abi-1 iso4	§428;393;423;422;335	Abl interactor 1	Q8CBW3;Q8CBW3-2;Q8CBW3-3;Q8CBW3-4;Q8CBW3-5	http://www.phosphosite.org/proteinAction.do?id=3348&showAllSites=true	52.3	IEKVVAIyDYTKDKD	Abl	Abl	VVAIY*DYTKDKDDELSFKEGAIIYVIK	4	804.66	28446		28230		28603			28345		28395		28112	85.7691		85.4778		85.4275			84.9416		85.0739		85.0229	1.4069		3.2922		4.4724			3.4542		3.4106
36	34	Adaptor/scaffold	Abi1;Abi1;Abi1;Abi1;Abi1	Abi-1;Abi-1 iso4;Abi-1 iso4;Abi-1 iso4;Abi-1 iso4	§428;393;423;422;335	Abl interactor 1	Q8CBW3;Q8CBW3-2;Q8CBW3-3;Q8CBW3-4;Q8CBW3-5	http://www.phosphosite.org/proteinAction.do?id=3348&showAllSites=true	52.3	IEKVVAIyDYTKDKD	Abl	Abl	VVAIY*DYTKDKDDELSFKEGAIIYVIK	4	804.66	28421												85.7025												2.0741
37	35	Adaptor/scaffold	Abi1;Abi1;Abi1;Abi1;Abi1	Abi-1;Abi-1 iso4;Abi-1 iso4;Abi-1 iso4;Abi-1 iso4	§428;393;423;422;335	Abl interactor 1	Q8CBW3;Q8CBW3-2;Q8CBW3-3;Q8CBW3-4;Q8CBW3-5	http://www.phosphosite.org/proteinAction.do?id=3348&showAllSites=true	52.3	IEKVVAIyDYTKDKD	Abl	Abl	VVAIY*DYTKDKDDELSFKEGAIIYVIKK	5	669.548									26024												78.9626												1.7984
38	36	Adaptor/scaffold	Abi1;Abi1;Abi1;Abi1;Abi1	Abi-1;Abi-1 iso4;Abi-1 iso4;Abi-1 iso4;Abi-1 iso4	430;395;425;424;337	Abl interactor 1	Q8CBW3;Q8CBW3-2;Q8CBW3-3;Q8CBW3-4;Q8CBW3-5	http://www.phosphosite.org/proteinAction.do?id=3348&showAllSites=true	52.3	KVVAIYDyTKDKDDE			VVAIYDY*TKDKDDELSFKEGAIIYVIK	4	804.66			28222				28100		28357						85.4566				85.2968		85.2314						2.7826				4.3198		4.0721
39	37	Adaptor/scaffold	Abi1;Abi1;Abi1;Abi1;Abi1	Abi-1;Abi-1 iso4;Abi-1 iso4;Abi-1 iso4;Abi-1 iso4	430;395;425;424;337	Abl interactor 1	Q8CBW3;Q8CBW3-2;Q8CBW3-3;Q8CBW3-4;Q8CBW3-5	http://www.phosphosite.org/proteinAction.do?id=3348&showAllSites=true	52.3	KVVAIYDyTKDKDDE			VVAIYDY*TKDKDDELSFKEGAIIYVIKK	4	836.683											26116												78.7951
40	38	Adaptor/scaffold	Abi1;Abi1;Abi1;Abi1;Abi1	Abi-1;Abi-1 iso4;Abi-1 iso4;Abi-1 iso4;Abi-1 iso4	431;396;426;425;338	Abl interactor 1	Q8CBW3;Q8CBW3-2;Q8CBW3-3;Q8CBW3-4;Q8CBW3-5	http://www.phosphosite.org/proteinAction.do?id=3348&showAllSites=true	52.3	VVAIYDYtKDKDDEL			VVAIYDYT*KDKDDELSFKEGAIIYVIK	4	804.66											28480												85.1576
41	39	Adaptor/scaffold	Abi1;Abi1;Abi1;Abi1;Abi1	Abi-1;Abi-1 iso4;Abi-1 iso4;Abi-1 iso4;Abi-1 iso4	431;396;426;425;338	Abl interactor 1	Q8CBW3;Q8CBW3-2;Q8CBW3-3;Q8CBW3-4;Q8CBW3-5	http://www.phosphosite.org/proteinAction.do?id=3348&showAllSites=true	52.3	VVAIYDYtKDKDDEL			VVAIYDYT*KDKDDELSFKEGAIIYVIKK	4	836.683				25789												78.5208												2.5312
42	40	Adaptor/scaffold	Abi1;Abi1;Abi1;Abi1;Abi1	Abi-1;Abi-1 iso4;Abi-1 iso4;Abi-1 iso4;Abi-1 iso4	431;396;426;425;338	Abl interactor 1	Q8CBW3;Q8CBW3-2;Q8CBW3-3;Q8CBW3-4;Q8CBW3-5	http://www.phosphosite.org/proteinAction.do?id=3348&showAllSites=true	52.3	VVAIYDYtKDKDDEL			VVAIYDYT*KDKDDELSFKEGAIIYVIKK	5	669.548				25809												78.5757												1.9136
43	41	Adaptor/scaffold	Abi2	Abi-2	§192	Abl interactor 2	P62484	http://www.phosphosite.org/proteinAction.do?id=6880&showAllSites=true	49.4	TLGRHSPyRTLEPVR			HSPY*RTLEPVRPPVVPNDYVPSPTR	4	739.123	20712	20865	20505	20414		20691	20355	20633		20657	20771		64.8066	64.0254	64.6424	64.072		64.1118	64.5122	64.2645		64.3419	64.4391		2.1728	4.8615	3.641	3.2814		5.1112	3.9865	4.8051		4.3735
44	42	Adaptor/scaffold	Abi2	Abi-2	§192	Abl interactor 2	P62484	http://www.phosphosite.org/proteinAction.do?id=6880&showAllSites=true	49.4	TLGRHSPyRTLEPVR			HSPY*RTLEPVRPPVVPNDYVPSPTR	4	739.123				20431												64.1171												4.1014
45	43	Adaptor/scaffold	Abi2	Abi-2	§393	Abl interactor 2	P62484	http://www.phosphosite.org/proteinAction.do?id=6880&showAllSites=true	49.4	LEKVVAIyDYTKDKE			VVAIY*DYTKDKEDELSFQEGAIIYVIK	3	1077.2			31394	31369	31808	31718	31300	31579	31551	31616	31675				94.0769	93.4937	94.0181	93.5701	93.9186	93.6018	93.8095	93.7139	93.7805				3.9946	4.7805	4.5702	4.7375	4.5278	6.5241	6.1752	5.3502
46	44	Adaptor/scaffold	Abi2	Abi-2	§393	Abl interactor 2	P62484	http://www.phosphosite.org/proteinAction.do?id=6880&showAllSites=true	49.4	LEKVVAIyDYTKDKE			VVAIY*DYTKDKEDELSFQEGAIIYVIK	3	1077.2								31587												93.6209												5.3039
47	45	Adaptor/scaffold	Abi2	Abi-2	§393	Abl interactor 2	P62484	http://www.phosphosite.org/proteinAction.do?id=6880&showAllSites=true	49.4	LEKVVAIyDYTKDKE			VVAIY*DYTKDKEDELSFQEGAIIYVIKK	4	840.178	29282	29459		28979	29425	29303	28942			29236	29287	28966	88.0106	87.0396		87.0916	87.6284	87.0953	87.5523			87.317	87.3453	87.312	2.2781	5.5602		5.4227	4.8025	5.2142	4.612			4.4656
48	46	Adaptor/scaffold	Abi2	Abi-2	143	Abl interactor 2	P62484	http://www.phosphosite.org/proteinAction.do?id=6880&showAllSites=true	49.4	YIRKPIDyTILDDIG			KPIDY*TILDDIGHGVK	3	621.98	26379	26471		25998					26245	26265	26359	26013	80.1337	79.036		79.0755					79.5493	79.3556	79.441	79.359	2.0406	3.4964		3.5484					2.6116	3.301
49	47	Adaptor/scaffold	Abi2	Abi-2	194	Abl interactor 2	P62484	http://www.phosphosite.org/proteinAction.do?id=6880&showAllSites=true	49.4	GRHSPYRtLEPVRPP			HSPYRT*LEPVRPPVVPNDYVPSPTR	4	739.123					20837		20368					20345					64.5965		64.5474					64.1761					4.0908		3.3412
50	48	Adaptor/scaffold	Abi2	Abi-2	395	Abl interactor 2	P62484	http://www.phosphosite.org/proteinAction.do?id=6880&showAllSites=true	49.4	KVVAIYDyTKDKEDE			VVAIYDY*TKDKEDELSFQEGAIIYVIKK	4	840.178			29063					29214							87.7366					87.2523							3.187					5.1789
51	49	Adaptor/scaffold	Abi2	Abi-2	396	Abl interactor 2	P62484	http://www.phosphosite.org/proteinAction.do?id=6880&showAllSites=true	49.4	VVAIYDYtKDKEDEL			VVAIYDYT*KDKEDELSFQEGAIIYVIK	3	1077.2	31609								31577				94.3849								93.8803				2.3892								3.2042
52	50	Adaptor/scaffold	Akap12;Akap12	AKAP12;AKAP12 iso 2	§353;248	A-kinase anchor protein 12	Q9WTQ5;Q9WTQ5-2	http://www.phosphosite.org/proteinAction.do?id=6741&showAllSites=true	180.6	QARLSADyEKVELPL			LSADY*EKVELPLEDQVGDLEALSEK	3	957.458			31439					31658			31753	31422			94.1977					93.8088			94.0054	93.8964			1.5331					3.2753
53	51	Adaptor/scaffold	Akap3	AKAP3	290	A-kinase anchor protein 3	O88987	http://www.phosphosite.org/proteinAction.do?id=9144&showAllSites=true	95.5	ISQGIMTyANSVVSD			IM#TY*ANSVVSDMM#VSIMKTLK	3	825.387	32866												97.7874												1.8275
54	52	Adaptor/scaffold	Akap4;Akap4	AKAP4;AKAP4 iso 2	§447;438	A-kinase anchor protein 4	Q60662;Q60662-2	http://www.phosphosite.org/proteinAction.do?id=9139&showAllSites=true	93.7	TKSQSLAyATLKAGT			SQSLAY*ATLKAGTNDPK	3	615.631					11861												40.5066												1.5289
55	53	Adaptor/scaffold	Ank1;Ank3;Ank3;Ank3;Ank2;Ank2;Ank2;Ank2;Ank1;Ank1;Ank1;Ank1;Ank1	ANK1;ANK3;ANK3 iso2;ANK3 iso10;ANK2;ANK2 iso2;ANK2 iso7;ANK2 iso7;ANK1 iso2;ANK1 iso7;ANK1 iso7;ANK1 iso7;ANK1 iso7	599;615;615;615;630;626;630;576;607;599;599;636;636	Ankyrin-1	Q02357;G5E8K5;G5E8K5-2;G5E8K5-3;Q8C8R3;Q8C8R3-2;Q8C8R3-4;Q8C8R3-5;Q02357-2;Q02357-3;Q02357-4;Q02357-5;Q02357-6	http://www.phosphosite.org/proteinAction.do?id=11179&showAllSites=true	204.1	HSPAWNGyTPLHIAA			NGY*TPLHIAAK	2	632.808		15430								15214				49.42								49.6332				1.9793								2.3033
56	54	Adaptor/scaffold	Ank2;Ank2;Ank2;Ank2	ANK2 iso2;ANK2;ANK2 iso7;ANK2 iso7	2911;2883;2883;2829	Ankyrin-2	Q8C8R3-2;Q8C8R3;Q8C8R3-4;Q8C8R3-5	http://www.phosphosite.org/proteinAction.do?id=8303&showAllSites=true	428.5	NSDPQIIsPYENVPS			FAMDVPVSELAETDENSDPQIIS*PYENVPSSSFFSAEPSK	4	1111											34475												101.285
57	55	Adaptor/scaffold	Ank2;Ank2;Ank2;Ank2	ANK2 iso2;ANK2;ANK2 iso7;ANK2 iso7	527;531;531;510	Ankyrin-2	Q8C8R3-2;Q8C8R3;Q8C8R3-4;Q8C8R3-5	http://www.phosphosite.org/proteinAction.do?id=8303&showAllSites=true	428.5	DAATTNGyTPLHISA			LGKTEIVQLLLQHM#AHPDAATTNGY*TPLHISAR	5	739.378						25677												77.4178												5.0732
58	56	Adaptor/scaffold	Ank2;Ank2;Ank2;Ank2	ANK2 iso2;ANK2;ANK2 iso7;ANK2 iso7	527;531;531;510	Ankyrin-2	Q8C8R3-2;Q8C8R3;Q8C8R3-4;Q8C8R3-5	http://www.phosphosite.org/proteinAction.do?id=8303&showAllSites=true	428.5	DAATTNGyTPLHISA			LGKTEIVQLLLQHMAHPDAATTNGY*TPLHISAR	4	919.972	30176	30216	29935	29730	30271	30058	29753	29968	30030	30012		29775	90.4593	89.0743	90.1186	89.1269	89.9146	89.1362	89.7621	89.2861	89.7431	89.4038		89.4854	2.9227	8.2233	1.8663	5.4445	7.024	8.0108	4.2326	5.7515	2.6206	3.7904
59	57	Adaptor/scaffold	Ank2;Ank2;Ank2;Ank2	ANK2 iso2;ANK2;ANK2 iso7;ANK2 iso7	527;531;531;510	Ankyrin-2	Q8C8R3-2;Q8C8R3;Q8C8R3-4;Q8C8R3-5	http://www.phosphosite.org/proteinAction.do?id=8303&showAllSites=true	428.5	DAATTNGyTPLHISA			LGKTEIVQLLLQHMAHPDAATTNGY*TPLHISAR	4	919.972										29995												89.3612												4.6618
60	58	Adaptor/scaffold	Ank2;Ank2;Ank2;Ank2	ANK2 iso2;ANK2;ANK2 iso7;ANK2 iso7	527;531;531;510	Ankyrin-2	Q8C8R3-2;Q8C8R3;Q8C8R3-4;Q8C8R3-5	http://www.phosphosite.org/proteinAction.do?id=8303&showAllSites=true	428.5	DAATTNGyTPLHISA			LGKTEIVQLLLQHMAHPDAATTNGY*TPLHISAR	5	736.179	30161	30199	29932	29713	30280	30118	29756	29954	29991	29985	30100	29765	90.4213	89.029	90.1092	89.0815	89.9382	89.3019	89.7695	89.2504	89.6408	89.335	89.5502	89.4571	7.1766	9.2057	6.678	9.5906	9.4278	3.999	8.0655	10.3114	7.4355	8.9469
61	59	Adaptor/scaffold	Ank2;Ank2;Ank2;Ank2	ANK2 iso2;ANK2;ANK2 iso7;ANK2 iso7	527;531;531;510	Ankyrin-2	Q8C8R3-2;Q8C8R3;Q8C8R3-4;Q8C8R3-5	http://www.phosphosite.org/proteinAction.do?id=8303&showAllSites=true	428.5	DAATTNGyTPLHISA			LGKTEIVQLLLQHMAHPDAATTNGY*TPLHISAR	5	736.179	30226					30053							90.6039					89.1218							4.057					10.7002
62	60	Adaptor/scaffold	Ank2;Ank2;Ank2;Ank2	ANK2 iso2;ANK2;ANK2 iso7;ANK2 iso7	527;531;531;510	Ankyrin-2	Q8C8R3-2;Q8C8R3;Q8C8R3-4;Q8C8R3-5	http://www.phosphosite.org/proteinAction.do?id=8303&showAllSites=true	428.5	DAATTNGyTPLHISA			TEIVQLLLQHMAHPDAATTNGY*TPLHISAR	4	845.422	32147	32242		31783	32319	32142	31813	32018	32055	32063	32139	31790	95.8686	94.5182		94.5992	95.3937	94.6968	95.293	94.7744	95.1655	94.9044	95.0465	94.8772	3.4705	7.7806		7.1864	7.0644	9.2223	5.1435	6.663	8.2787	7.5163
63	61	Adaptor/scaffold	Ank2;Ank2;Ank2;Ank2	ANK2 iso2;ANK2;ANK2 iso7;ANK2 iso7	528;532;532;511	Ankyrin-2	Q8C8R3-2;Q8C8R3;Q8C8R3-4;Q8C8R3-5	http://www.phosphosite.org/proteinAction.do?id=8303&showAllSites=true	428.5	AATTNGYtPLHISAR			LGKTEIVQLLLQHMAHPDAATTNGYT*PLHISAR	4	919.972				29775												89.2432												1.9515
64	62	Adaptor/scaffold	Ank2;Ank2;Ank2;Ank2	ANK2 iso2;ANK2;ANK2 iso7;ANK2 iso7	528;532;532;511	Ankyrin-2	Q8C8R3-2;Q8C8R3;Q8C8R3-4;Q8C8R3-5	http://www.phosphosite.org/proteinAction.do?id=8303&showAllSites=true	428.5	AATTNGYtPLHISAR			TEIVQLLLQHMAHPDAATTNGYT*PLHISAR	4	845.422			31921												95.5134												5.3265
65	63	Adaptor/scaffold	Ank2;Ank2;Ank2;Ank2	ANK2 iso2;ANK2;ANK2 iso7;ANK2 iso7	569;573;573;552	Ankyrin-2	Q8C8R3-2;Q8C8R3;Q8C8R3-4;Q8C8R3-5	http://www.phosphosite.org/proteinAction.do?id=8303&showAllSites=true	428.5	PLHVAAKyGSLDVAK			Y*GSLDVAK	2	466.71	12192	12348	11834	11866	12104	12073	11668	12023	11923	12028	12119	11723	41.3814	41.1536	41.082	41.0244	41.1652	41.0684	41.033	41.0973	41.0496	41.0872	41.042	40.9917	2.2058	2.3352	2.6212	2.3679	2.7816	2.4862	2.5893	2.6017	2.2125	2.3347
66	64	Adaptor/scaffold	Ank2;Ank2;Ank2;Ank2	ANK2 iso2;ANK2;ANK2 iso7;ANK2 iso7	725;729;729;675	Ankyrin-2	Q8C8R3-2;Q8C8R3;Q8C8R3-4;Q8C8R3-5	http://www.phosphosite.org/proteinAction.do?id=8303&showAllSites=true	428.5	DAYTKLGyTPLIVAC			LGY*TPLIVACHYGNVK	3	628.974	23528	23664	23271	23220	23649	23504	23167	23413	23365	23435	23527	23162	72.4729	71.5198	72.1345	71.6335	72.151	71.6161	72.0653	71.7209	71.8507	71.7847	71.8819	71.741	3.4082	5.6849	4.8039	5.7617	4.1059	6.0484	5.6726	5.4057	5.5257	5.6659
67	65	Adaptor/scaffold	Ank2;Ank2;Ank2;Ank2	ANK2 iso2;ANK2;ANK2 iso7;ANK2 iso7	734;738;738;684	Ankyrin-2	Q8C8R3-2;Q8C8R3;Q8C8R3-4;Q8C8R3-5	http://www.phosphosite.org/proteinAction.do?id=8303&showAllSites=true	428.5	PLIVACHyGNVKMVN			LGYTPLIVACHY*GNVK	2	942.958		23829												71.9616												2.3784
68	66	Adaptor/scaffold	Ank2;Ank2;Ank2;Ank2	ANK2 iso2;ANK2;ANK2 iso7;ANK2 iso7	734;738;738;684	Ankyrin-2	Q8C8R3-2;Q8C8R3;Q8C8R3-4;Q8C8R3-5	http://www.phosphosite.org/proteinAction.do?id=8303&showAllSites=true	428.5	PLIVACHyGNVKMVN			LGYTPLIVACHY*GNVK	3	628.974	23732		23458				23350		23558		23723	23360	73.0199		72.6543				72.5752		72.3724		72.406	72.2693	2.7317		4.2792				3.3878		2.9462
69	67	Adaptor/scaffold	Ank2;Ank2;Ank2;Ank2	ANK2 iso2;ANK2;ANK2 iso7;ANK2 iso7	842, 857;§846, 861;846, 861;792, 807	Ankyrin-2	Q8C8R3-2;Q8C8R3;Q8C8R3-4;Q8C8R3-5	http://www.phosphosite.org/proteinAction.do?id=8303&showAllSites=true	428.5	MTEVLDVsDEEGDDT;VTGDGGEyLRPEDLK			HKLNVPETMTEVLDVS*DEEGDDTVTGDGGEY*LRPEDLK	4	1091.48											27549												82.6411
70	68	Adaptor/scaffold	Ank2;Ank2;Ank2;Ank2;Ank2	ANK2 iso2;ANK2;ANK2 iso7;ANK2 iso7;ANK2 iso3	1377;§1349;1349;1295;511	Ankyrin-2	Q8C8R3-2;Q8C8R3;Q8C8R3-4;Q8C8R3-5;Q8C8R3-3	http://www.phosphosite.org/proteinAction.do?id=8303&showAllSites=true	428.5	VLEGKPIyVDCFGNL			SRDVEVLEGKPIY*VDCFGNLVPLTK	3	976.824	29098		28888				28777		29023		29120	28814	87.5206		87.268				87.1078		87.0225		86.9022	86.9031	1.0201		1.4925				4.2448		2.5708
71	69	Adaptor/scaffold	Ank2;Ank2;Ank2;Ank2;Ank2	ANK2 iso2;ANK2;ANK2 iso7;ANK2 iso7;ANK2 iso3	1377;§1349;1349;1295;511	Ankyrin-2	Q8C8R3-2;Q8C8R3;Q8C8R3-4;Q8C8R3-5;Q8C8R3-3	http://www.phosphosite.org/proteinAction.do?id=8303&showAllSites=true	428.5	VLEGKPIyVDCFGNL			SRDVEVLEGKPIY*VDCFGNLVPLTK	3	976.824												28785												86.8275
72	70	Adaptor/scaffold	Ank2;Ank2;Ank2;Ank2;Ank2	ANK2 iso2;ANK2;ANK2 iso7;ANK2 iso7;ANK2 iso3	1377;§1349;1349;1295;511	Ankyrin-2	Q8C8R3-2;Q8C8R3;Q8C8R3-4;Q8C8R3-5;Q8C8R3-3	http://www.phosphosite.org/proteinAction.do?id=8303&showAllSites=true	428.5	VLEGKPIyVDCFGNL			SRDVEVLEGKPIY*VDCFGNLVPLTK	4	732.87		29325												86.6825												1.3608
73	71	Adaptor/scaffold	Ank2;Ank2;Ank2;Ank2;Ank2	ANK2 iso2;ANK2;ANK2 iso7;ANK2 iso7;ANK2 iso3	3700;3672;3672;3618;763	Ankyrin-2	Q8C8R3-2;Q8C8R3;Q8C8R3-4;Q8C8R3-5;Q8C8R3-3	http://www.phosphosite.org/proteinAction.do?id=8303&showAllSites=true	428.5	EEDISVGySTFQDCL			EQEASKESESSDHPPMVSEEDISVGY*STFQDCLPK	4	1006.43											24440												74.316
74	72	Adaptor/scaffold	Ank2;Ank2;Ank2;Ank2;Ank2	ANK2 iso2;ANK2;ANK2 iso7;ANK2 iso7;ANK2 iso3	882;886;886;832;48	Ankyrin-2	Q8C8R3-2;Q8C8R3;Q8C8R3-4;Q8C8R3-5;Q8C8R3-3	http://www.phosphosite.org/proteinAction.do?id=8303&showAllSites=true	428.5	QFLDGMNyLRYSLEG			ELGDDSLPSSQFLDGMNY*LR	3	779.675	33367	33930		33396	33693							33312	99.1272	99.0463		98.9213	99.0646							98.9746	1.1414	2.0948		1.7923	1.4395
75	73	Adaptor/scaffold	Ank2;Ank2;Ank2;Ank2;Ank2;Ank2	ANK2 iso2;ANK2;ANK2 iso7;ANK2 iso7;ANK2 iso7;ANK2 iso7	239;243;243;222;258;222	Ankyrin-2	Q8C8R3-2;Q8C8R3;Q8C8R3-4;Q8C8R3-5;Q8C8R3-7;Q8C8R3-8	http://www.phosphosite.org/proteinAction.do?id=8303&showAllSites=true	428.5	PLHIAAHyGNVNVAT			TTESGFTPLHIAAHY*GNVNVATLLLNR	3	997.169	31620			31345	31824	31677	31315	31574					94.4175			93.4287	94.0613	93.4607	93.9589	93.5878					1.0457			3.3319	2.3765	3.7674	1.5251	2.6316
76	74	Adaptor/scaffold	Ank2;Ank2;Ank2;Ank2;Ank2;Ank2	ANK2 iso2;ANK2;ANK2 iso7;ANK2 iso7;ANK2 iso7;ANK2 iso7	239;243;243;222;258;222	Ankyrin-2	Q8C8R3-2;Q8C8R3;Q8C8R3-4;Q8C8R3-5;Q8C8R3-7;Q8C8R3-8	http://www.phosphosite.org/proteinAction.do?id=8303&showAllSites=true	428.5	PLHIAAHyGNVNVAT			TTESGFTPLHIAAHY*GNVNVATLLLNR	4	748.129			31422												94.1516												1.5379
77	75	Adaptor/scaffold	Ank3;Ank3;Ank3	ANK3;ANK3 iso2;ANK3 iso10	514;514;514	Ankyrin-3	G5E8K5;G5E8K5-2;G5E8K5-3	http://www.phosphosite.org/proteinAction.do?id=5260&showAllSites=true	213.9	SPNAATTsGYTPLHL			ADIVQQLLQQGASPNAATTS*GYTPLHLAAR	3	1058.2	31482	31822						31543					94.041	93.3745						93.505					1.2483	4.1411						3.1973
78	76	Adaptor/scaffold	Ank3;Ank3;Ank3	ANK3;ANK3 iso2;ANK3 iso10	516;516;516	Ankyrin-3	G5E8K5;G5E8K5-2;G5E8K5-3	http://www.phosphosite.org/proteinAction.do?id=5260&showAllSites=true	213.9	NAATTSGyTPLHLAA			ADIVQQLLQQGASPNAATTSGY*TPLHLAAR	3	1058.2				31330			31225				31623	31285				93.3905			93.7119				93.639	93.5275				5.1737			2.9312
79	77	Adaptor/scaffold	Ank3;Ank3;Ank3	ANK3;ANK3 iso2;ANK3 iso10	516;516;516	Ankyrin-3	G5E8K5;G5E8K5-2;G5E8K5-3	http://www.phosphosite.org/proteinAction.do?id=5260&showAllSites=true	213.9	NAATTSGyTPLHLAA			ADIVQQLLQQGASPNAATTSGY*TPLHLAAR	3	1058.2											31600	31269											93.579	93.485
80	78	Adaptor/scaffold	Ank3;Ank3;Ank3	ANK3;ANK3 iso2;ANK3 iso10	517;517;517	Ankyrin-3	G5E8K5;G5E8K5-2;G5E8K5-3	http://www.phosphosite.org/proteinAction.do?id=5260&showAllSites=true	213.9	AATTSGYtPLHLAAR			ADIVQQLLQQGASPNAATTSGYT*PLHLAAR	3	1058.2			31278							31564					93.763							93.5705					4.1906							5.011
81	79	Adaptor/scaffold	Ank3;Ank3;Ank3	ANK3;ANK3 iso2;ANK3 iso10	558;558;558	Ankyrin-3	G5E8K5;G5E8K5-2;G5E8K5-3	http://www.phosphosite.org/proteinAction.do?id=5260&showAllSites=true	213.9	PLHVAAKyGKLEVAS			Y*GKLEVASLLLQK	3	514.616			27400		27790		27299				27667	27293			83.2644		83.2604		83.1661				82.9522	82.8081			2.4032		2.5909		2.0228
82	80	Adaptor/scaffold	Ank3;Ank3;Ank3	ANK3;ANK3 iso2;ANK3 iso10	723;723;723	Ankyrin-3	G5E8K5;G5E8K5-2;G5E8K5-3	http://www.phosphosite.org/proteinAction.do?id=5260&showAllSites=true	213.9	PLHVGCHyGNIKIVN			MGYTPLHVGCHY*GNIK	3	642.951												16263												53.2611
83	81	Adaptor/scaffold	Ank3;Ank3;Ank3;Ank3;Ank3;Ank3	ANK3;ANK3 iso2;ANK3 iso10;ANK3 iso10;ANK3 iso10;ANK3 iso6	1371;1332;1332;504;504;504	Ankyrin-3	G5E8K5;G5E8K5-2;G5E8K5-3;G5E8K5-4;G5E8K5-5;G5E8K5-6	http://www.phosphosite.org/proteinAction.do?id=5260&showAllSites=true	213.9	KPIYVDCyGNLAPLT			SKDIEVLEGKPIYVDCY*GNLAPLTK	3	968.148		26231												78.3874												1.6247
84	82	Adaptor/scaffold	Ap1b1;Ap2b1;Ap2b1	AP1B1;AP2B1;AP2B1 iso 2	§136;§136;§136	AP-1 complex subunit beta-1	O35643;Q9DBG3;Q9DBG3-2	http://www.phosphosite.org/proteinAction.do?id=8525&showAllSites=true	103.9	CLKDEDPyVRKTAAV			CLKDEDPY*VR	3	458.863	10276		9921									9783	36.1451		35.8919									35.7707	1.0896		1.3475
85	83	Adaptor/scaffold	Ap1b1;Ap2b1;Ap2b1	AP1B1;AP2B1;AP2B1 iso 2	§136;§136;§136	AP-1 complex subunit beta-1	O35643;Q9DBG3;Q9DBG3-2	http://www.phosphosite.org/proteinAction.do?id=8525&showAllSites=true	103.9	CLKDEDPyVRKTAAV			CLKDEDPY*VRK	3	501.562	7814	7846	7458	7426	7621	7620	7264	7595	7507	7614	7680	7327	29.4164	29.0103	29.2148	29.0659	29.1135	29.1379	29.1438	29.1958	29.1332	29.1855	29.071	29.1214	2.5039	2.4184	2.053	2.4708	2.4964	2.0835	2.1582	2.4709	1.8539	2.1098
86	84	Adaptor/scaffold	Ap1b1;Ap2b1;Ap2b1	AP1B1;AP2B1;AP2B1 iso 2	§136;§136;§136	AP-1 complex subunit beta-1	O35643;Q9DBG3;Q9DBG3-2	http://www.phosphosite.org/proteinAction.do?id=8525&showAllSites=true	103.9	CLKDEDPyVRKTAAV			CLKDEDPY*VRK	3	501.562											7688												29.0966
87	85	Adaptor/scaffold	Ap1b1;Ap2b1;Ap2b1	AP1B1;AP2B1;AP2B1 iso 2	§894;§888;902	AP-1 complex subunit beta-1	O35643;Q9DBG3;Q9DBG3-2	http://www.phosphosite.org/proteinAction.do?id=8525&showAllSites=true	103.9	VEGQDMLyQSLKLTN			NVEGQDMLY*QSLK	2	802.855				22460							22722					69.5934							69.7134					2.701
88	86	Adaptor/scaffold	Ap1b1;Ap2b1;Ap2b1	AP1B1;AP2B1;AP2B1 iso 2	119;119;119	AP-1 complex subunit beta-1	O35643;Q9DBG3;Q9DBG3-2	http://www.phosphosite.org/proteinAction.do?id=8525&showAllSites=true	103.9	CIRVDKItEYLCEPL			VDKIT*EYLCEPLRK	3	615.306				20570	20999											64.4908	65.0247											2.5284	1.6585
89	87	Adaptor/scaffold	Ap1b1;Ap2b1;Ap2b1	AP1B1;AP2B1;AP2B1 iso 2	121;121;121	AP-1 complex subunit beta-1	O35643;Q9DBG3;Q9DBG3-2	http://www.phosphosite.org/proteinAction.do?id=8525&showAllSites=true	103.9	RVDKITEyLCEPLRK			VDKITEY*LCEPLRK	3	615.306		21015						20764				20515		64.4402						64.6088				64.6294		2.7134						2.6807
90	88	Adaptor/scaffold	Ap1b1;Ap2b1;Ap2b1	AP1B1;AP2B1;AP2B1 iso 2	333;333;333	AP-1 complex subunit beta-1	O35643;Q9DBG3;Q9DBG3-2	http://www.phosphosite.org/proteinAction.do?id=8525&showAllSites=true	103.9	VKYNDPIyVKLEKLD			YNDPIY*VKLEKLDIMIR	3	735.046							30075					30111							90.6335					90.3839							1.4329
91	89	Adaptor/scaffold	Ap2a1;Ap2a1	AP2A1;AP2A1 iso 2	§777;755	AP-2 complex subunit alpha-1	P17426;P17426-2	http://www.phosphosite.org/proteinAction.do?id=6049&showAllSites=true	107.6	RQNLGRMyLFYGNKT			M#Y*LFYGNK	2	566.233		20143	19641	19690				19836	19780	19860				62.0999	62.328	62.1329				62.1256	62.2445	62.2141				1.9025	2.3042	2.2486				2.038	2.1508	1.335
92	90	Adaptor/scaffold	Ap2a1;Ap2a1	AP2A1;AP2A1 iso 2	§777;755	AP-2 complex subunit alpha-1	P17426;P17426-2	http://www.phosphosite.org/proteinAction.do?id=6049&showAllSites=true	107.6	RQNLGRMyLFYGNKT			MY*LFYGNK	2	558.235	24423	24659	24161	24191	24560	24483	24075	24385	24321	24387	24478	24122	74.8745	74.1761	74.5375	74.2397	74.5836	74.2183	74.5102	74.3071	74.4139	74.3281	74.4167	74.3042	2.3919	2.6713	2.456	2.9982	2.7117	3.1095	2.8216	2.9482	3.1719	2.5089
93	91	Adaptor/scaffold	Ap2a1;Ap2a1	AP2A1;AP2A1 iso 2	250;250	AP-2 complex subunit alpha-1	P17426;P17426-2	http://www.phosphosite.org/proteinAction.do?id=6049&showAllSites=true	107.6	DLQDYTYyFVPAPWL			IVSSASTDLQDYTYY*FVPAPWLSVK	3	977.468		37914		37434		37784	37228	37616	37507	37647	37632	37333		109.773		109.774		109.782	109.839	109.774	109.82	109.838	109.76	109.782		1.5005		1.4134		2.3682	1.5461	2.722	3.3283	1.4423
94	92	Adaptor/scaffold	Ap2a1;Ap2a1	AP2A1;AP2A1 iso 2	394;394	AP-2 complex subunit alpha-1	P17426;P17426-2	http://www.phosphosite.org/proteinAction.do?id=6049&showAllSites=true	107.6	QRAADLLyAMCDRSN			AADLLY*AMCDR	2	689.78											26898	26542											80.8855	80.7669
95	93	Adaptor/scaffold	Ap2a1;Ap2a1	AP2A1;AP2A1 iso 2	418;418	AP-2 complex subunit alpha-1	P17426;P17426-2	http://www.phosphosite.org/proteinAction.do?id=6049&showAllSites=true	107.6	RYLETADyAIREEIV			YLETADY*AIREEIVLK	3	669.334								26547		26570										80.1075		80.1853										1.3502		1.6092
96	94	Adaptor/scaffold	Ap2a1;Ap2a1;Ap2a2	AP2A1;AP2A1 iso 2;AP2A2	347;347;346	AP-2 complex subunit alpha-1	P17426;P17426-2;P17427	http://www.phosphosite.org/proteinAction.do?id=6049&showAllSites=true	107.6	HRETNLRyLALESMC			Y*LALESMCTLASSEFSHEAVK	3	818.364											30398	30060											90.3414	90.249
97	95	Adaptor/scaffold	Ap2a2	AP2A2	§807	AP-2 complex subunit alpha-2	P17427	http://www.phosphosite.org/proteinAction.do?id=20132&showAllSites=true	104	VLNIQFRyGGTFQNV			Y*GGTFQNVSVK	2	640.29	16190		15869	15919	16199		15756		15970	16038	16174	15790	52.3972		52.0976	52.0062	52.1618		52.1043		52.0185	51.9544	52.0525	51.9954	2.1745		3.0203	3.3209	3.4055		1.8585		3.2061	3.747
98	96	Adaptor/scaffold	Ap2a2	AP2A2	§807	AP-2 complex subunit alpha-2	P17427	http://www.phosphosite.org/proteinAction.do?id=20132&showAllSites=true	104	VLNIQFRyGGTFQNV			Y*GGTFQNVSVK	2	640.29											16199												52.1193
99	97	Adaptor/scaffold	Ap2a2	AP2A2	§807	AP-2 complex subunit alpha-2	P17427	http://www.phosphosite.org/proteinAction.do?id=20132&showAllSites=true	104	VLNIQFRyGGTFQNV			Y*GGTFQNVSVKLPITLNK	3	687.026		27948		27476		27816	27426	27685	27676	27743		27452		82.9986		83.0793		83.1494	83.5036	83.1764	83.4086	83.3334		83.2395		5.1425		4.6439		4.6314	3.6233	3.8725	3.0754	1.8692
100	98	Adaptor/scaffold	Ap2a2	AP2A2	250	AP-2 complex subunit alpha-2	P17427	http://www.phosphosite.org/proteinAction.do?id=20132&showAllSites=true	104	DLQDYTYyFVPAPWL			IVTSASTDLQDYTYY*FVPAPWLSVK	3	982.14	37382	37967	37277		37817	37846	37293		37572		37695	37393	110.076	109.916	110.012		110.05	109.946	110.014		109.995		109.93	109.943	3.0456	4.1644	3.2241		3.8653	3.3169	2.1296		3.5354
101	99	Adaptor/scaffold	Ap2m1	AP2M1	204	AP-2 complex subunit mu	P84091	http://www.phosphosite.org/proteinAction.do?id=11190&showAllSites=true	49.6	SGRVVMKsYLSGMPE			S*YLSGM#PECK	2	634.24			10383												37.1541												1.0146
102	100	Adaptor/scaffold	Ap2m1	AP2M1	204	AP-2 complex subunit mu	P84091	http://www.phosphosite.org/proteinAction.do?id=11190&showAllSites=true	49.6	SGRVVMKsYLSGMPE			S*YLSGMPECK	2	626.243		15791									15594			50.391									50.3852			2.8931
103	101	Adaptor/scaffold	Ap2m1	AP2M1	205	AP-2 complex subunit mu	P84091	http://www.phosphosite.org/proteinAction.do?id=11190&showAllSites=true	49.6	GRVVMKSyLSGMPEC			SY*LSGM#PECK	2	634.24				10394					10103							37.0701					36.1489							1.9296					1.8518
104	102	Adaptor/scaffold	Ap2m1	AP2M1	205	AP-2 complex subunit mu	P84091	http://www.phosphosite.org/proteinAction.do?id=11190&showAllSites=true	49.6	GRVVMKSyLSGMPEC			SY*LSGMPECK	2	626.243	15650		15294	15316	15604	15545		15480	15413	15475		15194	50.791		50.4318	50.3077	50.5375	50.3471		50.3763	50.3958	50.3546		50.2875	1.8888		2.6143	2.8761	2.4951	2.9803		3.0423	2.6926	2.684
105	103	Adaptor/scaffold	Ap2m1	AP2M1	205	AP-2 complex subunit mu	P84091	http://www.phosphosite.org/proteinAction.do?id=11190&showAllSites=true	49.6	GRVVMKSyLSGMPEC			VVMKSY*LSGMPECK	3	570.255		17921												56.1437												2.5827
106	104	Adaptor/scaffold	Ap3b1;Ap3b2	AP3B1;AP3B2	565;569	AP-3 complex subunit beta-1	Q9Z1T1;Q9JME5	http://www.phosphosite.org/proteinAction.do?id=16601&showAllSites=true	122.7	YILNLGKyDQNYDIR			Y*DQNYDIR	2	583.729							11651		11904			11706							40.988		40.9999			40.9469							1.7898		1.5603
107	105	Adaptor/scaffold	Ap3b1;Ap3b2	AP3B1;AP3B2	565;569	AP-3 complex subunit beta-1	Q9Z1T1;Q9JME5	http://www.phosphosite.org/proteinAction.do?id=16601&showAllSites=true	122.7	YILNLGKyDQNYDIR			Y*DQNYDIR	2	583.729												11720												40.9824
108	106	Adaptor/scaffold	Ap3m1;Ap3m2	AP3M1;AP3M2	395;395	AP-3 complex subunit mu-1	Q9JKC8;Q8R2R9	http://www.phosphosite.org/proteinAction.do?id=12588&showAllSites=true	46.9	KVNRLDMyGEKYKPF			LDMY*GEKYKPFK	3	533.582	16322	16383	15990	15934	16336	16176	15854	16137	16074		16280	15863	52.7779	52.0362	52.4217	52.0463	52.5295	52.0541	52.3644	52.1989	52.3013		52.3404	52.1882	1.5066	2.9771	1.9615	2.6322	2.4268	2.7162	2.0674	2.6905	2.6827
109	107	Adaptor/scaffold	Ap3m1;Ap3m2	AP3M1;AP3M2	395;395	AP-3 complex subunit mu-1	Q9JKC8;Q8R2R9	http://www.phosphosite.org/proteinAction.do?id=12588&showAllSites=true	46.9	KVNRLDMyGEKYKPF			VNRLDMY*GEKYKPFK	4	492.742		15946			15887	15746								50.8018			51.3081	50.8809								3.7775			2.5722	3.1737
110	108	Adaptor/scaffold	Apba1;Apba1	APBA1;APBA1 iso 3	169, 172, 175;169, 172, 175	Amyloid-beta A4 precursor protein-binding family A member 1	B2RUJ5;B2RUJ5-3	http://www.phosphosite.org/proteinAction.do?id=18185&showAllSites=true	92.9	EEAMNAAySGYVYTH;MNAAYSGyVYTHRLF;AYSGYVYtHRLFHRA			ALPNHLHFHSLEHEEAMNAAY*SGY*VYT*HR	4	909.375												18810												60.0882
111	109	Adaptor/scaffold	Apba1;Apba1	APBA1;APBA1 iso 3	172, 174;172, 174	Amyloid-beta A4 precursor protein-binding family A member 1	B2RUJ5;B2RUJ5-3	http://www.phosphosite.org/proteinAction.do?id=18185&showAllSites=true	92.9	MNAAYSGyVYTHRLF;AAYSGYVyTHRLFHR			ALPNHLHFHSLEHEEAMNAAYSGY*VY*THR	5	711.709											18724	18343											58.9404	58.839
112	110	Adaptor/scaffold	Apbb1ip	RIAM	§343	Amyloid beta A4 precursor protein-binding family B member 1-interacting protein	Q8R5A3	http://www.phosphosite.org/proteinAction.do?id=8963&showAllSites=true	74.3	LLRASGIyYVPKGKT			ASGIY*YVPK	2	539.254		18197	17689	17733	18042				17835	17892	17983	17625		56.8854	57.0569	56.8771	57.1072				57.0333	56.9383	56.9511	56.9074		2.6534	1.8115	2.355	1.6581				1.7138	1.6717
113	111	Adaptor/scaffold	Apbb1ip	RIAM	344	Amyloid beta A4 precursor protein-binding family B member 1-interacting protein	Q8R5A3	http://www.phosphosite.org/proteinAction.do?id=8963&showAllSites=true	74.3	LRASGIYyVPKGKTK			ASGIYY*VPK	2	539.254	17986												57.371												1.3112
114	112	Adaptor/scaffold	Aplp1	APLP1	641	Amyloid-like protein 1	Q03157	http://www.phosphosite.org/proteinAction.do?id=17081&showAllSites=true	72.7	RELQRHGyENPTYRF			HGY*ENPTYR	2	608.743		6999						6683						26.722						26.7427						1.0484						1.3138
115	113	Adaptor/scaffold	Aplp1	APLP1	641, 645	Amyloid-like protein 1	Q03157	http://www.phosphosite.org/proteinAction.do?id=17081&showAllSites=true	72.7	RELQRHGyENPTYRF;RHGYENPtYRFLEER			HGY*ENPT*YRFLEERP	3	689.95				22113							22437					68.6466							68.9234					1.3063
116	114	Adaptor/scaffold	Aplp1	APLP1	645	Amyloid-like protein 1	Q03157	http://www.phosphosite.org/proteinAction.do?id=17081&showAllSites=true	72.7	RHGYENPtYRFLEER			HGYENPT*YRFLEERP	3	663.295				20822				21024								65.1727				65.3151								1.3402				1.5356
117	115	Adaptor/scaffold	Arrb1;Arrb1	ARRB1;ARRB1 iso 2	§47;§47	Beta-arrestin-1	Q8BWG8;Q8BWG8-2	http://www.phosphosite.org/proteinAction.do?id=7464&showAllSites=true	46.9	VVLVDPEyLKERRVY			DFVDHIDLVDPVDGVVLVDPEY*LK	3	931.121	36750	37361	36650	36870	37188	37223	36668	37072	36933	37068	37073	36762	108.377	108.267	108.327	108.264	108.377	108.285	108.346	108.317	108.29	108.296	108.271	108.252	4.0654	6.1306	5.2192	6.2778	4.9776	4.8881	5.5396	4.3419	6.5433	6.3768
118	116	Adaptor/scaffold	Arrb1;Arrb1	ARRB1;ARRB1 iso 2	§47;§47	Beta-arrestin-1	Q8BWG8;Q8BWG8-2	http://www.phosphosite.org/proteinAction.do?id=7464&showAllSites=true	46.9	VVLVDPEyLKERRVY			DFVDHIDLVDPVDGVVLVDPEY*LK	3	931.121	36754												108.39												3.9693
119	117	Adaptor/scaffold	Arrb1;Arrb1	ARRB1;ARRB1 iso 2	§47;§47	Beta-arrestin-1	Q8BWG8;Q8BWG8-2	http://www.phosphosite.org/proteinAction.do?id=7464&showAllSites=true	46.9	VVLVDPEyLKERRVY			DFVDHIDLVDPVDGVVLVDPEY*LKER	3	1026.17		35013	34494	34542				34750		34779	34840	34487		101.957	102.443	101.994				102.111		102.185	102.26	102.143		5.5476	4.4565	6.0393				6.2773		6.3539
120	118	Adaptor/scaffold	Arrb1;Arrb1	ARRB1;ARRB1 iso 2	§47;§47	Beta-arrestin-1	Q8BWG8;Q8BWG8-2	http://www.phosphosite.org/proteinAction.do?id=7464&showAllSites=true	46.9	VVLVDPEyLKERRVY			DFVDHIDLVDPVDGVVLVDPEY*LKER	3	1026.17								34735												102.071												6.4991
121	119	Adaptor/scaffold	Arrb1;Arrb1	ARRB1;ARRB1 iso 2	§47;§47	Beta-arrestin-1	Q8BWG8;Q8BWG8-2	http://www.phosphosite.org/proteinAction.do?id=7464&showAllSites=true	46.9	VVLVDPEyLKERRVY			DFVDHIDLVDPVDGVVLVDPEY*LKER	4	769.878				34558												102.037												2.9679
122	120	Adaptor/scaffold	Arrb1;Arrb1	ARRB1;ARRB1 iso 2	173;173	Beta-arrestin-1	Q8BWG8;Q8BWG8-2	http://www.phosphosite.org/proteinAction.do?id=7464&showAllSites=true	46.9	LVIRKVQyAPERPGP			KVQY*APERPGPQPTAETTR	3	736.027		9394	9024	8897	9180		8831	9082			9304	8827		33.1977	33.4712	33.0211	33.3127		33.381	33.206			33.4548	33.1988		1.9369	1.5843	1.2953	1.3435		1.4151	1.0877
123	121	Adaptor/scaffold	Arrb1;Arrb1	ARRB1;ARRB1 iso 2	238;238	Beta-arrestin-1	Q8BWG8;Q8BWG8-2	http://www.phosphosite.org/proteinAction.do?id=7464&showAllSites=true	46.9	IKISVRQyADICLFN			ISVRQY*ADICLFNTAQYK	3	757.361			25576	25537				25733							78.3525	77.8457				77.9183							1.7871	3.7694				3.1599
124	122	Adaptor/scaffold	Arrb1;Arrb1	ARRB1;ARRB1 iso 2	54;54	Beta-arrestin-1	Q8BWG8;Q8BWG8-2	http://www.phosphosite.org/proteinAction.do?id=7464&showAllSites=true	46.9	YLKERRVyVTLTCAF			RVY*VTLTCAFR	2	733.355											23317												71.3106
125	123	Adaptor/scaffold	Arrb2;Arrb2	ARRB2;ARRB2 iso2	§48;48	Beta-arrestin-2	Q91YI4;Q91YI4-2	http://www.phosphosite.org/proteinAction.do?id=2739&showAllSites=true	46.3	VVLVDPDyLKDRKVF			DFVDHLDKVDPVDGVVLVDPDY*LK	3	931.453			31611				31547				31953	31618			94.6831				94.5856				94.5444	94.4201			1.5175				2.667
126	124	Adaptor/scaffold	Bcar1;Bcar1	P130Cas;P130Cas iso 2	§132;§132	Breast cancer anti-estrogen resistance protein 1	Q61140;Q61140-2	http://www.phosphosite.org/proteinAction.do?id=1791&showAllSites=true	94.2	SKTQQGLyQAPGPNP			TQQGLY*QAPGPNPQFQSPPAK	3	778.702	17322	17620							17177	17304	17341	16996	55.516	55.3433							55.2605	55.3573	55.2106	55.2182	2.3883	4.0997							3.7874	2.4208
127	125	Adaptor/scaffold	Bcar1;Bcar1	P130Cas;P130Cas iso 2	§132;§132	Breast cancer anti-estrogen resistance protein 1	Q61140;Q61140-2	http://www.phosphosite.org/proteinAction.do?id=1791&showAllSites=true	94.2	SKTQQGLyQAPGPNP			TQQGLY*QAPGPNPQFQSPPAK	3	778.702		17604							17215			16972		55.2986							55.3626			55.1523		4.5599							1.9518
128	126	Adaptor/scaffold	Bcar1;Bcar1	P130Cas;P130Cas iso 2	§132;§132	Breast cancer anti-estrogen resistance protein 1	Q61140;Q61140-2	http://www.phosphosite.org/proteinAction.do?id=1791&showAllSites=true	94.2	SKTQQGLyQAPGPNP			TQQGLY*QAPGPNPQFQSPPAK	3	778.702												16984												55.1874
129	127	Adaptor/scaffold	Bcar1;Bcar1	P130Cas;P130Cas iso 2	§196;§196	Breast cancer anti-estrogen resistance protein 1	Q61140;Q61140-2	http://www.phosphosite.org/proteinAction.do?id=1791&showAllSites=true	94.2	AGIGHDIyQVPPSLD			QTPHHSFPSPATDLYQVPPGPGSPAQDIYQVPPSAGIGHDIY*QVPPSLDTR	5	1103.33											26850	26488											80.7583	80.6231
130	128	Adaptor/scaffold	Bcar1;Bcar1	P130Cas;P130Cas iso 2	§238;§238	Breast cancer anti-estrogen resistance protein 1	Q61140;Q61140-2	http://www.phosphosite.org/proteinAction.do?id=1791&showAllSites=true	94.2	AQTEQDEyDTPRHLL			VGQGYVYEAAQTEQDEY*DTPR	3	833.683	18650	19029					18304	18687	18562	18664	18722	18366	59.1826	59.1095					59.008	59.0184	58.973	59.0002	58.9356	58.8986	1.8261	3.9127					4.8078	5.1581	4.6783	5.5749
131	129	Adaptor/scaffold	Bcar1;Bcar1	P130Cas;P130Cas iso 2	§253;§253	Breast cancer anti-estrogen resistance protein 1	Q61140;Q61140-2	http://www.phosphosite.org/proteinAction.do?id=1791&showAllSites=true	94.2	APGPQDIyDVPPVRG			HLLAPGPQDIY*DVPPVR	3	656.331	23918	24482	23855		24277	24084	23684	23921	23817	24087	24104	23566	73.5129	73.7043	73.714		73.8291	73.1525	73.4658	73.0766	73.0698	73.5229	73.4255	72.825	3.0814	3.3127	2.9767		3.6239	3.914	4.6332	4.3233	4.05	4.8277
132	130	Adaptor/scaffold	Bcar1;Bcar1	P130Cas;P130Cas iso 2	§253;§253	Breast cancer anti-estrogen resistance protein 1	Q61140;Q61140-2	http://www.phosphosite.org/proteinAction.do?id=1791&showAllSites=true	94.2	APGPQDIyDVPPVRG			HLLAPGPQDIY*DVPPVR	3	656.331	24118	24210					23883	24145	24051	23847	24305	23765	74.0455	72.9797					73.9968	73.6696	73.6925	72.883	73.9623	73.354	3.3843	4.33					3.7269	4.2446	4.242	3.3925
133	131	Adaptor/scaffold	Bcar1;Bcar1	P130Cas;P130Cas iso 2	§253;§253	Breast cancer anti-estrogen resistance protein 1	Q61140;Q61140-2	http://www.phosphosite.org/proteinAction.do?id=1791&showAllSites=true	94.2	APGPQDIyDVPPVRG			HLLAPGPQDIY*DVPPVR	3	656.331	24315						23607				23902	23974	74.5777						73.2612				72.8852	73.9146	2.4611						4.0296
134	132	Adaptor/scaffold	Bcar1;Bcar1	P130Cas;P130Cas iso 2	§310;§310	Breast cancer anti-estrogen resistance protein 1	Q61140;Q61140-2	http://www.phosphosite.org/proteinAction.do?id=1791&showAllSites=true	94.2	SSSHHSVyDVPPSVS			GLLSSSHHSVY*DVPPSVSK	3	692.665	16771	17217					16587	16745	16638		16896	16334	54.022	54.2666					54.341	53.825	53.8168		54.0174	53.4512	1.7566	2.8859					1.9455	3.0874	2.6345
135	133	Adaptor/scaffold	Bcar1;Bcar1	P130Cas;P130Cas iso 2	§310;§310	Breast cancer anti-estrogen resistance protein 1	Q61140;Q61140-2	http://www.phosphosite.org/proteinAction.do?id=1791&showAllSites=true	94.2	SSSHHSVyDVPPSVS			GLLSSSHHSVY*DVPPSVSK	3	692.665	16998	16840							17066		16690	16135	54.6266	53.259							54.9671		53.4649	52.914	1.7524	2.9622							1.2774
136	134	Adaptor/scaffold	Bcar1;Bcar1	P130Cas;P130Cas iso 2	§310;§310	Breast cancer anti-estrogen resistance protein 1	Q61140;Q61140-2	http://www.phosphosite.org/proteinAction.do?id=1791&showAllSites=true	94.2	SSSHHSVyDVPPSVS			GLLSSSHHSVY*DVPPSVSK	3	692.665		16944									16931	16299		53.5365									54.1139	53.3583		3.9361
137	135	Adaptor/scaffold	Bcar1;Bcar1	P130Cas;P130Cas iso 2	§310;§310	Breast cancer anti-estrogen resistance protein 1	Q61140;Q61140-2	http://www.phosphosite.org/proteinAction.do?id=1791&showAllSites=true	94.2	SSSHHSVyDVPPSVS			GLLSSSHHSVY*DVPPSVSK	3	692.665												16540												54.003
138	136	Adaptor/scaffold	Bcar1;Bcar1	P130Cas;P130Cas iso 2	§331;§331	Breast cancer anti-estrogen resistance protein 1	Q61140;Q61140-2	http://www.phosphosite.org/proteinAction.do?id=1791&showAllSites=true	94.2	PLLREETyDVPPAFA			DVPDGPLLREETY*DVPPAFAK	3	803.717										27500	27573	27219										82.6884	82.703	82.6082										1.8914
139	137	Adaptor/scaffold	Bcar1;Bcar1	P130Cas;P130Cas iso 2	§366, §376;§366, §376	Breast cancer anti-estrogen resistance protein 1	Q61140;Q61140-2	http://www.phosphosite.org/proteinAction.do?id=1791&showAllSites=true	94.2	SPAAEDVyDVPPPAP;PPPAPDLyDVPPGLR			PKPFDPTRHPLILAAPPPDSPAAEDVY*DVPPPAPDLY*DVPPGLR	4	1218.34	30243	30441			30363	30510			30265	30299	30404	29931	90.6515	89.6756			90.1589	90.3436			90.3694	90.1817	90.3557	89.9044	3.1802	3.3504			3.363	3.9989			2.5135	3.4905
140	138	Adaptor/scaffold	Bcar1;Bcar1	P130Cas;P130Cas iso 2	§366, §376;§366, §376	Breast cancer anti-estrogen resistance protein 1	Q61140;Q61140-2	http://www.phosphosite.org/proteinAction.do?id=1791&showAllSites=true	94.2	SPAAEDVyDVPPPAP;PPPAPDLyDVPPGLR			PKPFDPTRHPLILAAPPPDSPAAEDVY*DVPPPAPDLY*DVPPGLR	4	1218.34		30709			30432	30328					30513	30190		90.389			90.3431	89.8588					90.6572	90.5961		3.2461			4.1396	4.0925
141	139	Adaptor/scaffold	Bcar1;Bcar1	P130Cas;P130Cas iso 2	§366, §376;§366, §376	Breast cancer anti-estrogen resistance protein 1	Q61140;Q61140-2	http://www.phosphosite.org/proteinAction.do?id=1791&showAllSites=true	94.2	SPAAEDVyDVPPPAP;PPPAPDLyDVPPGLR			PKPFDPTRHPLILAAPPPDSPAAEDVY*DVPPPAPDLY*DVPPGLR	4	1218.34											30291	30113											90.0563	90.389
142	140	Adaptor/scaffold	Bcar1;Bcar1	P130Cas;P130Cas iso 2	§366, §376;§366, §376	Breast cancer anti-estrogen resistance protein 1	Q61140;Q61140-2	http://www.phosphosite.org/proteinAction.do?id=1791&showAllSites=true	94.2	SPAAEDVyDVPPPAP;PPPAPDLyDVPPGLR			PKPFDPTRHPLILAAPPPDSPAAEDVY*DVPPPAPDLY*DVPPGLR	4	1218.34												29876												89.7572
143	141	Adaptor/scaffold	Bcar1;Bcar1	P130Cas;P130Cas iso 2	§366, §376;§366, §376	Breast cancer anti-estrogen resistance protein 1	Q61140;Q61140-2	http://www.phosphosite.org/proteinAction.do?id=1791&showAllSites=true	94.2	SPAAEDVyDVPPPAP;PPPAPDLyDVPPGLR			PKPFDPTRHPLILAAPPPDSPAAEDVY*DVPPPAPDLY*DVPPGLR	4	1218.34												29903												89.8292
144	142	Adaptor/scaffold	Bcar1;Bcar1	P130Cas;P130Cas iso 2	§366, §376;§366, §376	Breast cancer anti-estrogen resistance protein 1	Q61140;Q61140-2	http://www.phosphosite.org/proteinAction.do?id=1791&showAllSites=true	94.2	SPAAEDVyDVPPPAP;PPPAPDLyDVPPGLR			PKPFDPTRHPLILAAPPPDSPAAEDVY*DVPPPAPDLY*DVPPGLR	4	1218.34												30134												90.4463
145	143	Adaptor/scaffold	Bcar1;Bcar1	P130Cas;P130Cas iso 2	§366, §376;§366, §376	Breast cancer anti-estrogen resistance protein 1	Q61140;Q61140-2	http://www.phosphosite.org/proteinAction.do?id=1791&showAllSites=true	94.2	SPAAEDVyDVPPPAP;PPPAPDLyDVPPGLR			PKPFDPTRHPLILAAPPPDSPAAEDVY*DVPPPAPDLY*DVPPGLR	5	974.877	30223	30557			30446	30305						30003	90.5946	89.9875			90.3785	89.7994						90.0974	3.2164	4.3862			4.8707	4.4628
146	144	Adaptor/scaffold	Bcar1;Bcar1	P130Cas;P130Cas iso 2	§366, §376;§366, §376	Breast cancer anti-estrogen resistance protein 1	Q61140;Q61140-2	http://www.phosphosite.org/proteinAction.do?id=1791&showAllSites=true	94.2	SPAAEDVyDVPPPAP;PPPAPDLyDVPPGLR			PKPFDPTRHPLILAAPPPDSPAAEDVY*DVPPPAPDLY*DVPPGLR	5	974.877	30164	30624											90.4287	90.1634											2.6368	4.5601
147	145	Adaptor/scaffold	Bcar1;Bcar1	P130Cas;P130Cas iso 2	§366, §376;§366, §376	Breast cancer anti-estrogen resistance protein 1	Q61140;Q61140-2	http://www.phosphosite.org/proteinAction.do?id=1791&showAllSites=true	94.2	SPAAEDVyDVPPPAP;PPPAPDLyDVPPGLR			PKPFDPTRHPLILAAPPPDSPAAEDVY*DVPPPAPDLY*DVPPGLR	5	974.877		30433												89.654												4.247
148	146	Adaptor/scaffold	Bcar1;Bcar1	P130Cas;P130Cas iso 2	§366;§366	Breast cancer anti-estrogen resistance protein 1	Q61140;Q61140-2	http://www.phosphosite.org/proteinAction.do?id=1791&showAllSites=true	94.2	SPAAEDVyDVPPPAP			PKPFDPTRHPLILAAPPPDSPAAEDVY*DVPPPAPDLYDVPPGLR	5	958.884	29810												89.4212												1.6737
149	147	Adaptor/scaffold	Bcar1;Bcar1	P130Cas;P130Cas iso 2	§389;§389	Breast cancer anti-estrogen resistance protein 1	Q61140;Q61140-2	http://www.phosphosite.org/proteinAction.do?id=1791&showAllSites=true	94.2	LRRPGPGtLYDVPRE			RPGPGT*LYDVPR	2	704.343	15557		15223		15510	15356			15283				50.542		50.2449		50.2829	49.8425			50.0471				1.8119		2.0211		2.178	2.7128			2.6889
150	148	Adaptor/scaffold	Bcar1;Bcar1	P130Cas;P130Cas iso 2	§391;§391	Breast cancer anti-estrogen resistance protein 1	Q61140;Q61140-2	http://www.phosphosite.org/proteinAction.do?id=1791&showAllSites=true	94.2	RPGPGTLyDVPRERV			RPGPGTLY*DVPR	2	704.343		15551		15131			15057	15305		15316	15461	15053		49.746		49.7942			50.1376	49.8843		49.9056	50.0287	49.9118		2.1676		2.3358			2.3668	2.2065		2.3628
151	149	Adaptor/scaffold	Bcar1;Bcar1	P130Cas;P130Cas iso 2	§391;§391	Breast cancer anti-estrogen resistance protein 1	Q61140;Q61140-2	http://www.phosphosite.org/proteinAction.do?id=1791&showAllSites=true	94.2	RPGPGTLyDVPRERV			RPGPGTLY*DVPR	3	469.898	15573	15553	15222	15130	15518		15054	15307	15279	15307	15440	15052	50.5848	49.7507	50.2426	49.7918	50.305		50.1305	49.889	50.0377	49.8818	49.9743	49.9095	3.498	3.8364	3.1963	3.4317	3.1897		3.7516	3.4226	3.7664	3.4085
152	150	Adaptor/scaffold	Bcar1;Bcar1	P130Cas;P130Cas iso 2	§391;§391	Breast cancer anti-estrogen resistance protein 1	Q61140;Q61140-2	http://www.phosphosite.org/proteinAction.do?id=1791&showAllSites=true	94.2	RPGPGTLyDVPRERV			RPGPGTLY*DVPRER	3	564.945		13209	12904	12811	13166	13006	12733	12967	12948	13004	13143	12741		43.4527	44.0255	43.568	44.0047	43.5585	43.9205	43.6229	43.8161	43.7005	43.8339	43.7202		1.967	2.8836	2.3057	2.8393	2.5306	3.1699	2.5252	2.5568	2.7246
153	151	Adaptor/scaffold	Bcar1;Bcar1	P130Cas;P130Cas iso 2	§414;§414	Breast cancer anti-estrogen resistance protein 1	Q61140;Q61140-2	http://www.phosphosite.org/proteinAction.do?id=1791&showAllSites=true	94.2	SVVDDGVyAVPPPAE			VLPPEVADGSVVDDGVY*AVPPPAER	3	876.758	25566	26051	25424	25538		25969	25283	25756	25777	25721	25920	25415	77.9714	77.8882	77.9475	77.848		78.2005	77.7527	77.9818	78.2968	77.8941	78.2633	77.7636	3.0791	4.4932	3.0289	3.778		3.5557	3.0116	4.3791	4.3667	4.8489
154	152	Adaptor/scaffold	Bcar1;Bcar1	P130Cas;P130Cas iso 2	§414;§414	Breast cancer anti-estrogen resistance protein 1	Q61140;Q61140-2	http://www.phosphosite.org/proteinAction.do?id=1791&showAllSites=true	94.2	SVVDDGVyAVPPPAE			VLPPEVADGSVVDDGVY*AVPPPAER	3	876.758	25821	26249				25841			25564	25912	25830		78.6413	78.4376				77.8589			77.7269	78.4128	78.0253		2.661	3.5405				4.1715			3.7755	3.3192
155	153	Adaptor/scaffold	Bcar1;Bcar1	P130Cas;P130Cas iso 2	§414;§414	Breast cancer anti-estrogen resistance protein 1	Q61140;Q61140-2	http://www.phosphosite.org/proteinAction.do?id=1791&showAllSites=true	94.2	SVVDDGVyAVPPPAE			VLPPEVADGSVVDDGVY*AVPPPAER	3	876.758	25782									25693	25718		78.5391									77.8185	77.729		2.9511									3.9521
156	154	Adaptor/scaffold	Bcar1;Bcar1	P130Cas;P130Cas iso 2	§556;§556	Breast cancer anti-estrogen resistance protein 1	Q61140;Q61140-2	http://www.phosphosite.org/proteinAction.do?id=1791&showAllSites=true	94.2	LQKMEDVyQTLVVHG			M#EDVY*QTLVVHGQVLDSGR	3	748.012										21549												66.7462												1.2014
157	155	Adaptor/scaffold	Bcar1;Bcar1	P130Cas;P130Cas iso 2	§556;§556	Breast cancer anti-estrogen resistance protein 1	Q61140;Q61140-2	http://www.phosphosite.org/proteinAction.do?id=1791&showAllSites=true	94.2	LQKMEDVyQTLVVHG			MEDVY*QTLVVHGQVLDSGR	3	742.68	23077	23340		22889			22758	23069	23000	23070	23142	22786	71.2154	70.6602		70.7443			70.9589	70.8046	70.8782	70.8146	70.8374	70.737	3.4707	5.2715		6.0602			5.0386	4.8098	5.3833	6.161
158	156	Adaptor/scaffold	Bcar1;Bcar1	P130Cas;P130Cas iso 2	183, §196;183, §196	Breast cancer anti-estrogen resistance protein 1	Q61140;Q61140-2	http://www.phosphosite.org/proteinAction.do?id=1791&showAllSites=true	94.2	GSPAQDIyQVPPSAG;AGIGHDIyQVPPSLD			QTPHHSFPSPATDLYQVPPGPGSPAQDIY*QVPPSAGIGHDIY*QVPPSLDTR	5	1119.32	26695	27257											80.986	81.146											1.4549	1.9106
159	157	Adaptor/scaffold	Bcar1;Bcar1	P130Cas;P130Cas iso 2	183;183	Breast cancer anti-estrogen resistance protein 1	Q61140;Q61140-2	http://www.phosphosite.org/proteinAction.do?id=1791&showAllSites=true	94.2	GSPAQDIyQVPPSAG			QTPHHSFPSPATDLYQVPPGPGSPAQDIY*QVPPSAGIGHDIYQVPPSLDTR	5	1103.33	26975												81.7362												1.9394
160	158	Adaptor/scaffold	Bcar1;Bcar1	P130Cas;P130Cas iso 2	183;183	Breast cancer anti-estrogen resistance protein 1	Q61140;Q61140-2	http://www.phosphosite.org/proteinAction.do?id=1791&showAllSites=true	94.2	GSPAQDIyQVPPSAG			QTPHHSFPSPATDLYQVPPGPGSPAQDIY*QVPPSAGIGHDIYQVPPSLDTR	5	1103.33	26915												81.5773												1.7648
161	159	Adaptor/scaffold	Bcar1;Bcar1	P130Cas;P130Cas iso 2	303, §330;303, §330	Breast cancer anti-estrogen resistance protein 1	Q61140;Q61140-2	http://www.phosphosite.org/proteinAction.do?id=1791&showAllSites=true	94.2	SVEKGLLsSSHHSVY;GPLLREEtYDVPPAF			GLLS*SSHHSVYDVPPSVSKDVPDGPLLREET*YDVPPAFAK	4	1117.28											26405												79.5639
162	160	Adaptor/scaffold	Bcar1;Bcar1	P130Cas;P130Cas iso 2	359, §376;359, §376	Breast cancer anti-estrogen resistance protein 1	Q61140;Q61140-2	http://www.phosphosite.org/proteinAction.do?id=1791&showAllSites=true	94.2	LAAPPPDsPAAEDVY;PPPAPDLyDVPPGLR			PKPFDPTRHPLILAAPPPDS*PAAEDVYDVPPPAPDLY*DVPPGLR	4	1218.34											30350												90.2133
163	161	Adaptor/scaffold	Bcar3	BCAR3	§103	Breast cancer anti-estrogen resistance protein 3	Q9QZK2	http://www.phosphosite.org/proteinAction.do?id=7189&showAllSites=true	92.2	NFIFRDPyLLDPTLE			KGENFIFRDPY*LLDPTLEYVK	3	879.772		31428	31045	30938	31458	31286	30947	31160	31162	31217	31288	30930		92.3137	93.1351	92.3447	93.0937	92.4184	92.9734	92.4801	92.7707	92.6365	92.7527	92.581		4.8061	1.9295	4.2056	2.5563	3.9658	2.3141	5.1246	5.4496	5.3106
164	162	Adaptor/scaffold	Bcar3	BCAR3	§103	Breast cancer anti-estrogen resistance protein 3	Q9QZK2	http://www.phosphosite.org/proteinAction.do?id=7189&showAllSites=true	92.2	NFIFRDPyLLDPTLE			KGENFIFRDPY*LLDPTLEYVK	3	879.772			31027												93.0876												3.817
165	163	Adaptor/scaffold	Bcar3	BCAR3	§103, §108	Breast cancer anti-estrogen resistance protein 3	Q9QZK2	http://www.phosphosite.org/proteinAction.do?id=7189&showAllSites=true	92.2	NFIFRDPyLLDPTLE;DPYLLDPtLEYVKFS			KGENFIFRDPY*LLDPT*LEYVKFSK	3	1027.16	30914					30988							92.4488					91.627							1.6247					1.4241
166	164	Adaptor/scaffold	Bcar3	BCAR3	§103, §111	Breast cancer anti-estrogen resistance protein 3	Q9QZK2	http://www.phosphosite.org/proteinAction.do?id=7189&showAllSites=true	92.2	NFIFRDPyLLDPTLE;LLDPTLEyVKFSKER			KGENFIFRDPY*LLDPTLEY*VK	3	906.427	31813	32107		31634	32064	31967		31867		31883			94.9328	94.1566		94.1992	94.7073	94.2323		94.3666		94.42			2.522	4.2945		3.8911	3.5625	5.5835		2.4438		4.2338
167	165	Adaptor/scaffold	Bcar3	BCAR3	§103, §111	Breast cancer anti-estrogen resistance protein 3	Q9QZK2	http://www.phosphosite.org/proteinAction.do?id=7189&showAllSites=true	92.2	NFIFRDPyLLDPTLE;LLDPTLEyVKFSKER			KGENFIFRDPY*LLDPTLEY*VKFSK	3	1027.16												30630												91.7714
168	166	Adaptor/scaffold	Bcar3	BCAR3	§103, §111	Breast cancer anti-estrogen resistance protein 3	Q9QZK2	http://www.phosphosite.org/proteinAction.do?id=7189&showAllSites=true	92.2	NFIFRDPyLLDPTLE;LLDPTLEyVKFSKER			KGENFIFRDPY*LLDPTLEY*VKFSK	4	770.621	30921	31123		30655	31086	30971					30975		92.468	91.5024		91.5921	92.0879	91.582					91.8927		2.3112	5.4629		1.5428	4.9761	6.2906
169	167	Adaptor/scaffold	Bcar3	BCAR3	§103, §111	Breast cancer anti-estrogen resistance protein 3	Q9QZK2	http://www.phosphosite.org/proteinAction.do?id=7189&showAllSites=true	92.2	NFIFRDPyLLDPTLE;LLDPTLEyVKFSKER			KGENFIFRDPY*LLDPTLEY*VKFSK	4	770.621					31107	30977											92.1443	91.5986											4.0949	5.5466
170	168	Adaptor/scaffold	Bcar3	BCAR3	§111	Breast cancer anti-estrogen resistance protein 3	Q9QZK2	http://www.phosphosite.org/proteinAction.do?id=7189&showAllSites=true	92.2	LLDPTLEyVKFSKER			KGENFIFRDPYLLDPTLEY*VK	3	879.772	30834	30962	30611	30494	30991	30831		30724	30734	30757	30840	30991	92.2352	91.063	91.9376	91.155	91.8373	91.2006		91.3085	91.6146	91.396	91.5332	92.7417	1.8469	4.5117	2.2059	3.7489	2.3987	4.3881		6.0635	4.8735	4.8386
171	169	Adaptor/scaffold	Bcar3	BCAR3	§111	Breast cancer anti-estrogen resistance protein 3	Q9QZK2	http://www.phosphosite.org/proteinAction.do?id=7189&showAllSites=true	92.2	LLDPTLEyVKFSKER			KGENFIFRDPYLLDPTLEY*VKFSK	4	750.629	30051	30184	29837	29709	30205	30033	29699	29961	29950	29994	30077	29725	90.132	88.9879	89.8568	89.0696	89.738	89.0656	89.6189	89.2692	89.531	89.3585	89.4878	89.3522	4.1226	5.2487	3.1573	5.0162	5.9542	5.9852	5.0759	3.3634	5.4783	2.5053
172	170	Adaptor/scaffold	Bcar3	BCAR3	§111	Breast cancer anti-estrogen resistance protein 3	Q9QZK2	http://www.phosphosite.org/proteinAction.do?id=7189&showAllSites=true	92.2	LLDPTLEyVKFSKER			KGENFIFRDPYLLDPTLEY*VKFSK	4	750.629										29962												89.2727												5.5247
173	171	Adaptor/scaffold	Bcar3	BCAR3	§111	Breast cancer anti-estrogen resistance protein 3	Q9QZK2	http://www.phosphosite.org/proteinAction.do?id=7189&showAllSites=true	92.2	LLDPTLEyVKFSKER			KGENFIFRDPYLLDPTLEY*VKFSKER	5	657.734		27940				27808								82.9771				83.1281								1.8825				3.6495
174	172	Adaptor/scaffold	Bcar3	BCAR3	§111	Breast cancer anti-estrogen resistance protein 3	Q9QZK2	http://www.phosphosite.org/proteinAction.do?id=7189&showAllSites=true	92.2	LLDPTLEyVKFSKER			KGENFIFRDPYLLDPTLEY*VKFSKER	5	657.734		27928												82.9462												3.6395
175	173	Adaptor/scaffold	Bcar3;Bcar3	BCAR3;BCAR3 iso 2	§206;86	Breast cancer anti-estrogen resistance protein 3	Q9QZK2;Q9QZK2-2	http://www.phosphosite.org/proteinAction.do?id=7189&showAllSites=true	92.2	VLRLSEAySRVQYQF			LSEAY*SR	2	453.192		6111		5581		5806	5419	5868	5732	5832	5914	5557		24.292		23.9153		24.2717	24.0203	24.5469	24.2731	24.3744	24.2474	24.263		1.7635		1.5029		1.866	1.6314	2.0791	1.7366	1.8303
176	174	Adaptor/scaffold	Bcar3;Bcar3	BCAR3;BCAR3 iso 2	§424;304	Breast cancer anti-estrogen resistance protein 3	Q9QZK2;Q9QZK2-2	http://www.phosphosite.org/proteinAction.do?id=7189&showAllSites=true	92.2	WLTSEANyCELNPAF			TPPSPSPWLTSEANY*CELNPAFAVGCDR	3	1072.8	31001	31481		30984		31319					31174	30880	92.6797	92.4547		92.4636		92.5037					92.4459	92.4445	2.935	5.1046		3.8204		4.5464
177	175	Adaptor/scaffold	Bcar3;Bcar3	BCAR3;BCAR3 iso 2	207;87	Breast cancer anti-estrogen resistance protein 3	Q9QZK2;Q9QZK2-2	http://www.phosphosite.org/proteinAction.do?id=7189&showAllSites=true	92.2	LRLSEAYsRVQYQFE			LSEAYS*R	2	453.192					5794												24.169												1.3013
178	176	Adaptor/scaffold	Bin1;Bin1	BIN1;BIN1 iso2	157;157	Myc box-dependent-interacting protein 1	O08539;O08539-2	http://www.phosphosite.org/proteinAction.do?id=6054&showAllSites=true	64.4	YDSARHHyESLQTAK			HHY*ESLQTAK	3	431.859	5262												22.3812												1.6558
179	177	Adaptor/scaffold	Cab39	CAB39	§324	Calcium-binding protein 39	Q06138	http://www.phosphosite.org/proteinAction.do?id=10190&showAllSites=true	39.8	EQFNDEKtYLVKQIR			FQNDRTEDEQFNDEKT*YLVK	3	867.05											16204												52.134
180	178	Adaptor/scaffold	Cab39	CAB39	§325	Calcium-binding protein 39	Q06138	http://www.phosphosite.org/proteinAction.do?id=10190&showAllSites=true	39.8	QFNDEKTyLVKQIRD			FQNDRTEDEQFNDEKTY*LVK	3	867.05												15799												52.0192
181	179	Adaptor/scaffold	Cab39	CAB39	223	Calcium-binding protein 39	Q06138	http://www.phosphosite.org/proteinAction.do?id=10190&showAllSites=true	39.8	KLLHSENyVTKRQSL			LLHSENY*VTKR	3	480.573	8861	8896	8483	8439	8742	8642	8283	8601	8537	8631	8772	8307	32.3082	31.8597	32.0009	31.7938	32.1275	31.8747	31.9031	31.9078	31.9235	31.9439	32.0169	31.7791	1.7669	3.2339	2.2555	2.1001	2.4982	2.8463	2.4904	2.464	2.4873	2.3874
182	180	Adaptor/scaffold	Cacybp	CACYBP	§200	Calcyclin-binding protein	Q9CXW3	http://www.phosphosite.org/proteinAction.do?id=9294&showAllSites=true	26.5	MNVLKKIyEDGDDDM			KIY*EDGDDDMKR	3	522.216		7058												26.88												1.6465
183	181	Adaptor/scaffold	Caskin1;Caskin1;Caskin1	CASKIN1;CASKIN1 iso 2;CASKIN1 iso 3	§891, 909;820, 838;§891, 909	Caskin-1	Q6P9K8;Q6P9K8-2;Q6P9K8-3	http://www.phosphosite.org/proteinAction.do?id=7164&showAllSites=true	150.4	SLNRYAAsDSEPERD;VPAAAGPyATVQRRV			YAAS*DSEPERDELLVPAAAGPY*ATVQR	3	1012.78	24488										24672		75.0615										74.9345		1.9655
184	182	Adaptor/scaffold	Caskin1;Caskin1;Caskin1	CASKIN1;CASKIN1 iso 2;CASKIN1 iso 3	457;457;457	Caskin-1	Q6P9K8;Q6P9K8-2;Q6P9K8-3	http://www.phosphosite.org/proteinAction.do?id=7164&showAllSites=true	150.4	AAHAGQVyGEQPPKK			SQPPAAHAGQVY*GEQPPK	3	647.967		9615				9294								33.793				33.6271								2.5421				2.2123
185	183	Adaptor/scaffold	Caskin1;Caskin1;Caskin1	CASKIN1;CASKIN1 iso 2;CASKIN1 iso 3	457;457;457	Caskin-1	Q6P9K8;Q6P9K8-2;Q6P9K8-3	http://www.phosphosite.org/proteinAction.do?id=7164&showAllSites=true	150.4	AAHAGQVyGEQPPKK			SQPPAAHAGQVY*GEQPPKKLESASASASEGK	4	797.632	11384	11532									11323	10871	39.1682	38.9608									38.9066	38.7053	1.1407	1.1599
186	184	Adaptor/scaffold	Caskin1;Caskin1;Caskin1	CASKIN1;CASKIN1 iso 2;CASKIN1 iso 3	457;457;457	Caskin-1	Q6P9K8;Q6P9K8-2;Q6P9K8-3	http://www.phosphosite.org/proteinAction.do?id=7164&showAllSites=true	150.4	AAHAGQVyGEQPPKK			SQPPAAHAGQVY*GEQPPKKLESASASASEGK	4	797.632											11289												38.8161
187	185	Adaptor/scaffold	Caskin1;Caskin1;Caskin1	CASKIN1;CASKIN1 iso 2;CASKIN1 iso 3	614;543;614	Caskin-1	Q6P9K8;Q6P9K8-2;Q6P9K8-3	http://www.phosphosite.org/proteinAction.do?id=7164&showAllSites=true	150.4	AELQKAEySKYEGGP			AEY*SKYEGGPLR	2	725.324											12527	12134											42.1477	42.0838
188	186	Adaptor/scaffold	Caskin1;Caskin1;Caskin1	CASKIN1;CASKIN1 iso 2;CASKIN1 iso 3	614;543;614	Caskin-1	Q6P9K8;Q6P9K8-2;Q6P9K8-3	http://www.phosphosite.org/proteinAction.do?id=7164&showAllSites=true	150.4	AELQKAEySKYEGGP			AEY*SKYEGGPLR	3	483.885	12644	12681				12426	12095		12341	12404	12515	12121	42.6382	42.0456				42.0124	42.1929		42.178	42.0905	42.1118	42.0478	1.4409	1.9059				1.183	1.7125		2.7508	1.669
189	187	Adaptor/scaffold	Caskin1;Caskin1;Caskin1	CASKIN1;CASKIN1 iso 2;CASKIN1 iso 3	614;543;614	Caskin-1	Q6P9K8;Q6P9K8-2;Q6P9K8-3	http://www.phosphosite.org/proteinAction.do?id=7164&showAllSites=true	150.4	AELQKAEySKYEGGP			AEY*SKYEGGPLR	3	483.885		12672												42.0219												2.319
190	188	Adaptor/scaffold	Caskin1;Caskin1;Caskin1	CASKIN1;CASKIN1 iso 2;CASKIN1 iso 3	614;543;614	Caskin-1	Q6P9K8;Q6P9K8-2;Q6P9K8-3	http://www.phosphosite.org/proteinAction.do?id=7164&showAllSites=true	150.4	AELQKAEySKYEGGP			AEY*SKYEGGPLRR	3	535.919			10207							10278	10414				36.6754							36.3941	36.4629				1.3751							1.474
191	189	Adaptor/scaffold	Caskin1;Caskin1;Caskin1	CASKIN1;CASKIN1 iso 2;CASKIN1 iso 3	614;543;614	Caskin-1	Q6P9K8;Q6P9K8-2;Q6P9K8-3	http://www.phosphosite.org/proteinAction.do?id=7164&showAllSites=true	150.4	AELQKAEySKYEGGP			KLAELQKAEY*SK	3	496.588		9857			9777							9377		34.4432			34.9132							34.6826		2.3984			1.48
192	190	Adaptor/scaffold	Caskin1;Caskin1;Caskin1	CASKIN1;CASKIN1 iso 2;CASKIN1 iso 3	614;543;614	Caskin-1	Q6P9K8;Q6P9K8-2;Q6P9K8-3	http://www.phosphosite.org/proteinAction.do?id=7164&showAllSites=true	150.4	AELQKAEySKYEGGP			KLAELQKAEY*SKYEGGPLR	4	565.79					15288	15114											49.6709	49.2033											1.8359	3.2166
193	191	Adaptor/scaffold	Caskin1;Caskin1;Caskin1	CASKIN1;CASKIN1 iso 2;CASKIN1 iso 3	614;543;614	Caskin-1	Q6P9K8;Q6P9K8-2;Q6P9K8-3	http://www.phosphosite.org/proteinAction.do?id=7164&showAllSites=true	150.4	AELQKAEySKYEGGP			KLAELQKAEY*SKYEGGPLRR	4	604.815	13709			13305	13611	13504							45.5428			44.8897	45.185	44.8842							1.2805			1.469	2.5892	3.5512
194	192	Adaptor/scaffold	Caskin1;Caskin1;Caskin1	CASKIN1;CASKIN1 iso 2;CASKIN1 iso 3	614;543;614	Caskin-1	Q6P9K8;Q6P9K8-2;Q6P9K8-3	http://www.phosphosite.org/proteinAction.do?id=7164&showAllSites=true	150.4	AELQKAEySKYEGGP			KLAELQKAEY*SKYEGGPLRR	5	484.054											13610	13188											45.0811	44.9135
195	193	Adaptor/scaffold	Caskin1;Caskin1;Caskin1	CASKIN1;CASKIN1 iso 2;CASKIN1 iso 3	614;543;614	Caskin-1	Q6P9K8;Q6P9K8-2;Q6P9K8-3	http://www.phosphosite.org/proteinAction.do?id=7164&showAllSites=true	150.4	AELQKAEySKYEGGP			LAELQKAEY*SKYEGGPLR	3	711.352	16622	16631		16213		16433		16392		16393	16528	16108	53.6137	52.7006		52.7977		52.7384		52.882		52.9085	53.0262	52.8421	1.2057	4.6103		1.4517		3.8081		2.3719		2.9613
196	194	Adaptor/scaffold	Caskin1;Caskin1;Caskin1	CASKIN1;CASKIN1 iso 2;CASKIN1 iso 3	614;543;614	Caskin-1	Q6P9K8;Q6P9K8-2;Q6P9K8-3	http://www.phosphosite.org/proteinAction.do?id=7164&showAllSites=true	150.4	AELQKAEySKYEGGP			LAELQKAEY*SKYEGGPLRR	4	572.791	14758	14725			14672			14478	14483	14514	14636	14237	48.3832	47.5163			48.0277			47.6659	47.9181	47.7518	47.8245	47.7282	1.6308	2.3841			3.2842			2.3117	2.0179	1.3948
197	195	Adaptor/scaffold	Caskin1;Caskin1;Caskin1	CASKIN1;CASKIN1 iso 2;CASKIN1 iso 3	614;543;614	Caskin-1	Q6P9K8;Q6P9K8-2;Q6P9K8-3	http://www.phosphosite.org/proteinAction.do?id=7164&showAllSites=true	150.4	AELQKAEySKYEGGP			LAELQKAEY*SKYEGGPLRR	4	572.791											14631												47.8105
198	196	Adaptor/scaffold	Caskin1;Caskin1;Caskin1	CASKIN1;CASKIN1 iso 2;CASKIN1 iso 3	615;544;615	Caskin-1	Q6P9K8;Q6P9K8-2;Q6P9K8-3	http://www.phosphosite.org/proteinAction.do?id=7164&showAllSites=true	150.4	ELQKAEYsKYEGGPL			KLAELQKAEYS*K	3	496.588	9928												35.1966												1.3598
199	197	Adaptor/scaffold	Caskin1;Caskin1;Caskin1	CASKIN1;CASKIN1 iso 2;CASKIN1 iso 3	615;544;615	Caskin-1	Q6P9K8;Q6P9K8-2;Q6P9K8-3	http://www.phosphosite.org/proteinAction.do?id=7164&showAllSites=true	150.4	ELQKAEYsKYEGGPL			KLAELQKAEYS*KYEGGPLR	4	565.79		15310		14901			14831	15081	15071	15090	15200	14811		49.0906		49.1779			49.5332	49.2873	49.4812	49.3013	49.3337	49.2692		4.3165		1.5891			1.7999	2.6134	2.1199	2.7977
200	198	Adaptor/scaffold	Caskin1;Caskin1;Caskin1	CASKIN1;CASKIN1 iso 2;CASKIN1 iso 3	615;544;615	Caskin-1	Q6P9K8;Q6P9K8-2;Q6P9K8-3	http://www.phosphosite.org/proteinAction.do?id=7164&showAllSites=true	150.4	ELQKAEYsKYEGGPL			KLAELQKAEYS*KYEGGPLRR	4	604.815		13720						13489			13603	13184		44.8316						45.0242			45.0619	44.9015		2.8527						1.3944
201	199	Adaptor/scaffold	Caskin1;Caskin1;Caskin1	CASKIN1;CASKIN1 iso 2;CASKIN1 iso 3	615;544;615	Caskin-1	Q6P9K8;Q6P9K8-2;Q6P9K8-3	http://www.phosphosite.org/proteinAction.do?id=7164&showAllSites=true	150.4	ELQKAEYsKYEGGPL			LAELQKAEYS*KYEGGPLR	3	711.352					16588												53.203												2.1108
202	200	Adaptor/scaffold	Caskin1;Caskin1;Caskin1	CASKIN1;CASKIN1 iso 2;CASKIN1 iso 3	615;544;615	Caskin-1	Q6P9K8;Q6P9K8-2;Q6P9K8-3	http://www.phosphosite.org/proteinAction.do?id=7164&showAllSites=true	150.4	ELQKAEYsKYEGGPL			LAELQKAEYS*KYEGGPLRR	4	572.791						14505												47.5569												2.4443
203	201	Adaptor/scaffold	Caskin1;Caskin1;Caskin1	CASKIN1;CASKIN1 iso 2;CASKIN1 iso 3	909;838;909	Caskin-1	Q6P9K8;Q6P9K8-2;Q6P9K8-3	http://www.phosphosite.org/proteinAction.do?id=7164&showAllSites=true	150.4	VPAAAGPyATVQRRV			YAASDSEPERDELLVPAAAGPY*ATVQR	3	986.129		22839	22374	22397	22768	22658	22317	22567	22522	22567	22647	22316		69.3182	69.6847	69.4228	69.7871	69.359	69.778	69.4622	69.5992	69.474	69.5088	69.4855		5.5917	5.1185	5.4272	5.7979	6.2016	4.8706	5.9691	6.1796	6.9495
204	202	Adaptor/scaffold	Caskin1;Caskin1;Caskin1	CASKIN1;CASKIN1 iso 2;CASKIN1 iso 3	909;838;909	Caskin-1	Q6P9K8;Q6P9K8-2;Q6P9K8-3	http://www.phosphosite.org/proteinAction.do?id=7164&showAllSites=true	150.4	VPAAAGPyATVQRRV			YAASDSEPERDELLVPAAAGPY*ATVQR	3	986.129			22408						22518						69.7749						69.5876						4.2613						5.5042
205	203	Adaptor/scaffold	Caskin1;Caskin1;Caskin1	CASKIN1;CASKIN1 iso 2;CASKIN1 iso 3	909;838;909	Caskin-1	Q6P9K8;Q6P9K8-2;Q6P9K8-3	http://www.phosphosite.org/proteinAction.do?id=7164&showAllSites=true	150.4	VPAAAGPyATVQRRV			YAASDSEPERDELLVPAAAGPY*ATVQRR	3	1038.16	20623	20789			20754					20547		20280	64.5677	63.8224			64.3709					64.0501		64.0051	1.7888	5.3043			3.8414					4.366
206	204	Adaptor/scaffold	Caskin1;Caskin1;Caskin1	CASKIN1;CASKIN1 iso 2;CASKIN1 iso 3	909;838;909	Caskin-1	Q6P9K8;Q6P9K8-2;Q6P9K8-3	http://www.phosphosite.org/proteinAction.do?id=7164&showAllSites=true	150.4	VPAAAGPyATVQRRV			YAASDSEPERDELLVPAAAGPY*ATVQRR	4	778.874	20614	20795					20241	20533			20646		64.5435	63.8368					64.213	63.9985			64.1089		2.1922	6.8985					5.3696	6.3345
207	205	Adaptor/scaffold	Caskin1;Caskin1;Caskin1	CASKIN1;CASKIN1 iso 2;CASKIN1 iso 3	909;838;909	Caskin-1	Q6P9K8;Q6P9K8-2;Q6P9K8-3	http://www.phosphosite.org/proteinAction.do?id=7164&showAllSites=true	150.4	VPAAAGPyATVQRRV			YAASDSEPERDELLVPAAAGPY*ATVQRR	4	778.874								20551												64.0462												6.2306
208	206	Adaptor/scaffold	Caskin1;Caskin1;Caskin1	CASKIN1;CASKIN1 iso 2;CASKIN1 iso 3	911;840;911	Caskin-1	Q6P9K8;Q6P9K8-2;Q6P9K8-3	http://www.phosphosite.org/proteinAction.do?id=7164&showAllSites=true	150.4	AAAGPYAtVQRRVGR			YAASDSEPERDELLVPAAAGPYAT*VQR	3	986.129	22732						22322	22617					70.2831						69.7943	69.5965					4.2567						4.9021	4.6449
209	207	Adaptor/scaffold	Caskin1;Caskin1;Caskin1	CASKIN1;CASKIN1 iso 2;CASKIN1 iso 3	911;840;911	Caskin-1	Q6P9K8;Q6P9K8-2;Q6P9K8-3	http://www.phosphosite.org/proteinAction.do?id=7164&showAllSites=true	150.4	AAAGPYAtVQRRVGR			YAASDSEPERDELLVPAAAGPYAT*VQR	3	986.129	22601												69.9263												3.8715
210	208	Adaptor/scaffold	Caskin1;Caskin1;Caskin1	CASKIN1;CASKIN1 iso 2;CASKIN1 iso 3	911;840;911	Caskin-1	Q6P9K8;Q6P9K8-2;Q6P9K8-3	http://www.phosphosite.org/proteinAction.do?id=7164&showAllSites=true	150.4	AAAGPYAtVQRRVGR			YAASDSEPERDELLVPAAAGPYAT*VQRR	3	1038.16			20404	20343				20543	20505		20638				64.3733	63.8826				64.0246	64.1742		64.0877				1.8432	3.6925				4.5422	3.199
211	209	Adaptor/scaffold	Caskin1;Caskin1;Caskin1	CASKIN1;CASKIN1 iso 2;CASKIN1 iso 3	911;840;911	Caskin-1	Q6P9K8;Q6P9K8-2;Q6P9K8-3	http://www.phosphosite.org/proteinAction.do?id=7164&showAllSites=true	150.4	AAAGPYAtVQRRVGR			YAASDSEPERDELLVPAAAGPYAT*VQRR	3	1038.16			20395												64.3495												2.8304
212	210	Adaptor/scaffold	Caskin1;Caskin1;Caskin1	CASKIN1;CASKIN1 iso 2;CASKIN1 iso 3	911;840;911	Caskin-1	Q6P9K8;Q6P9K8-2;Q6P9K8-3	http://www.phosphosite.org/proteinAction.do?id=7164&showAllSites=true	150.4	AAAGPYAtVQRRVGR			YAASDSEPERDELLVPAAAGPYAT*VQRR	4	778.874	20620		20391	20341	20744				20496	20583		20303	64.5607		64.3377	63.8778	64.3447				64.1504	64.1457		64.0666	3.1712		4.5189	5.0999	5.0273				5.3214	1.5856
213	211	Adaptor/scaffold	Caskin1;Caskin1;Caskin1;Caskin1	CASKIN1;CASKIN1 iso 2;CASKIN1 iso 3;CASKIN1 iso 4	§296;§296;§296;§296	Caskin-1	Q6P9K8;Q6P9K8-2;Q6P9K8-3;Q6P9K8-4	http://www.phosphosite.org/proteinAction.do?id=7164&showAllSites=true	150.4	TKDYCNNyDLTSLNV			ATKDYCNNY*DLTSLNVK	2	1049.96											18169	17808											57.4503	57.4033
214	212	Adaptor/scaffold	Caskin1;Caskin1;Caskin1;Caskin1	CASKIN1;CASKIN1 iso 2;CASKIN1 iso 3;CASKIN1 iso 4	§296;§296;§296;§296	Caskin-1	Q6P9K8;Q6P9K8-2;Q6P9K8-3;Q6P9K8-4	http://www.phosphosite.org/proteinAction.do?id=7164&showAllSites=true	150.4	TKDYCNNyDLTSLNV			ATKDYCNNY*DLTSLNVK	3	700.31		18332	17902	17875	18252	18123	17752	18058	18001	18047	18154	17777		57.2503	57.6282	57.2587	57.6707	57.2542	57.5278	57.3391	57.4825	57.3545	57.4125	57.3222		4.5415	3.9247	5.4082	4.6786	5.6077	4.0054	4.8914	5.2054	5.587
215	213	Adaptor/scaffold	Caskin1;Caskin1;Caskin1;Caskin1	CASKIN1;CASKIN1 iso 2;CASKIN1 iso 3;CASKIN1 iso 4	§296;§296;§296;§296	Caskin-1	Q6P9K8;Q6P9K8-2;Q6P9K8-3;Q6P9K8-4	http://www.phosphosite.org/proteinAction.do?id=7164&showAllSites=true	150.4	TKDYCNNyDLTSLNV			DYCNNY*DLTSLNVK	2	899.871	21384	21806	21153	21330				21465	21354	21448	21525	21167	66.6063	66.5566	66.3742	66.5576				66.5159	66.454	66.4797	66.4758	66.3781	2.392	3.7341	3.0485	3.5685				3.6438	3.4541	4.0086
216	214	Adaptor/scaffold	Caskin1;Caskin1;Caskin1;Caskin1	CASKIN1;CASKIN1 iso 2;CASKIN1 iso 3;CASKIN1 iso 4	253;253;253;253	Caskin-1	Q6P9K8;Q6P9K8-2;Q6P9K8-3;Q6P9K8-4	http://www.phosphosite.org/proteinAction.do?id=7164&showAllSites=true	150.4	NAQVRNTySQTALDI			NTY*SQTALDIVHQFTTSQASK	3	807.376		29567	29084	29087	29488	29414	28996	29296	29258	29319	29356	29016		87.3249	87.7923	87.3818	87.7938	87.3914	87.7	87.4748	87.6506	87.5425	87.5271	87.4429		7.1569	7.2084	7.7058	7.5866	7.2939	7.3427	7.6978	7.3234	7.8661
217	215	Adaptor/scaffold	Caskin1;Caskin1;Caskin1;Caskin1	CASKIN1;CASKIN1 iso 2;CASKIN1 iso 3;CASKIN1 iso 4	292;292;292;292	Caskin-1	Q6P9K8;Q6P9K8-2;Q6P9K8-3;Q6P9K8-4	http://www.phosphosite.org/proteinAction.do?id=7164&showAllSites=true	150.4	QVRATKDyCNNYDLT			ATKDY*CNNYDLTSLNVK	2	1049.96											19787	19411											61.8105	61.6992
218	216	Adaptor/scaffold	Caskin1;Caskin1;Caskin1;Caskin1	CASKIN1;CASKIN1 iso 2;CASKIN1 iso 3;CASKIN1 iso 4	292;292;292;292	Caskin-1	Q6P9K8;Q6P9K8-2;Q6P9K8-3;Q6P9K8-4	http://www.phosphosite.org/proteinAction.do?id=7164&showAllSites=true	150.4	QVRATKDyCNNYDLT			ATKDY*CNNYDLTSLNVK	2	1049.96												19421												61.7252
219	217	Adaptor/scaffold	Caskin1;Caskin1;Caskin1;Caskin1	CASKIN1;CASKIN1 iso 2;CASKIN1 iso 3;CASKIN1 iso 4	292;292;292;292	Caskin-1	Q6P9K8;Q6P9K8-2;Q6P9K8-3;Q6P9K8-4	http://www.phosphosite.org/proteinAction.do?id=7164&showAllSites=true	150.4	QVRATKDyCNNYDLT			ATKDY*CNNYDLTSLNVK	3	700.31	19755	19924	19486	19472	19837	19721	19363	19647	19613	19656	19771	19392	62.2237	61.516	61.9003	61.5529	61.9261	61.5076	61.8757	61.6274	61.8028	61.6706	61.7675	61.6492	4.1705	5.8825	3.7823	5.8209	4.3959	4.3898	4.602	5.2287	4.5937	5.3392
220	218	Adaptor/scaffold	Caskin1;Caskin1;Caskin1;Caskin1	CASKIN1;CASKIN1 iso 2;CASKIN1 iso 3;CASKIN1 iso 4	336;336;336;336	Caskin-1	Q6P9K8;Q6P9K8-2;Q6P9K8-3;Q6P9K8-4	http://www.phosphosite.org/proteinAction.do?id=7164&showAllSites=true	150.4	TGNDRVGyFPSSLGE			TGNDRVGY*FPSSLGEAIVKR	3	749.37				23187												71.5452												3.9868
221	219	Adaptor/scaffold	Caskin1;Caskin1;Caskin1;Caskin1	CASKIN1;CASKIN1 iso 2;CASKIN1 iso 3;CASKIN1 iso 4	336;336;336;336	Caskin-1	Q6P9K8;Q6P9K8-2;Q6P9K8-3;Q6P9K8-4	http://www.phosphosite.org/proteinAction.do?id=7164&showAllSites=true	150.4	TGNDRVGyFPSSLGE			VGY*FPSSLGEAIVKR	3	568.29	25471	25594	25169	25101			25082	25392	25291	25338	25434	25067	77.7116	76.671	77.2577	76.6775			77.2101	77.0045	76.9978	76.8686	76.9719	76.8334	2.1006	3.8464	3.2463	3.8966			3.489	3.5366	3.2184	4.5731
222	220	Adaptor/scaffold	Caskin1;Caskin1;Caskin1;Caskin1	CASKIN1;CASKIN1 iso 2;CASKIN1 iso 3;CASKIN1 iso 4	336;336;336;336	Caskin-1	Q6P9K8;Q6P9K8-2;Q6P9K8-3;Q6P9K8-4	http://www.phosphosite.org/proteinAction.do?id=7164&showAllSites=true	150.4	TGNDRVGyFPSSLGE			VGY*FPSSLGEAIVKR	3	568.29												25140												77.0343
223	221	Adaptor/scaffold	Cav1	caveolin-1	§14	Caveolin-1	P49817	http://www.phosphosite.org/proteinAction.do?id=1253&showAllSites=true	20.5	VDSEGHLyTVPIREQ	INSR		YVDSEGHLY*TVPIREQGNIYKPNNK	4	754.366		17255												54.3696												1.5688
224	222	Adaptor/scaffold	Cav1	caveolin-1	§15	Caveolin-1	P49817	http://www.phosphosite.org/proteinAction.do?id=1253&showAllSites=true	20.5	DSEGHLYtVPIREQG			YVDSEGHLYT*VPIREQGNIYKPNNK	4	754.366				16827												54.4485												1.2102
225	223	Adaptor/scaffold	Cbl	CBL	§672	E3 ubiquitin-protein ligase CBL	P22682	http://www.phosphosite.org/proteinAction.do?id=1436&showAllSites=true	100.5	SSSANAIySLAARPL			IKPSSSANAIY*SLAARPLPMPK	3	798.087		24156		23738							24083			72.8351		73.0183							73.3708			3.0363		3.0161
226	224	Adaptor/scaffold	Cbl	CBL	§673	E3 ubiquitin-protein ligase CBL	P22682	http://www.phosphosite.org/proteinAction.do?id=1436&showAllSites=true	100.5	SSANAIYsLAARPLP			IKPSSSANAIYS*LAARPLPMPK	3	798.087					24165												73.5304												2.8323
227	225	Adaptor/scaffold	Cbl	CBL	§696	E3 ubiquitin-protein ligase CBL	P22682	http://www.phosphosite.org/proteinAction.do?id=1436&showAllSites=true	100.5	QGESEEDtEYMTPTS			LPPGEQGESEEDT*EYM#TPTSRPVGVQKPEPK	4	877.901											12887												43.1476
228	226	Adaptor/scaffold	Cbl	CBL	§696	E3 ubiquitin-protein ligase CBL	P22682	http://www.phosphosite.org/proteinAction.do?id=1436&showAllSites=true	100.5	QGESEEDtEYMTPTS			LPPGEQGESEEDT*EYM#TPTSRPVGVQKPEPK	4	877.901											12853												43.0573
229	227	Adaptor/scaffold	Cbl	CBL	§698	E3 ubiquitin-protein ligase CBL	P22682	http://www.phosphosite.org/proteinAction.do?id=1436&showAllSites=true	100.5	ESEEDTEyMTPTSRP			LPPGEQGESEEDTEY*M#TPTSRPVGVQKPEPK	4	877.901									12693												43.1356												2.6121
230	228	Adaptor/scaffold	Cbl	CBL	§698	E3 ubiquitin-protein ligase CBL	P22682	http://www.phosphosite.org/proteinAction.do?id=1436&showAllSites=true	100.5	ESEEDTEyMTPTSRP			LPPGEQGESEEDTEY*MTPTSRPVGVQKPEPK	4	873.902	15327	15495	15058				14868		15143		15238	14841	49.9186	49.5963	49.7993				49.6308		49.6748		49.4339	49.3481	3.6795	5.746	3.1654				3.9893		3.9738
231	229	Adaptor/scaffold	Cbl	CBL	§698	E3 ubiquitin-protein ligase CBL	P22682	http://www.phosphosite.org/proteinAction.do?id=1436&showAllSites=true	100.5	ESEEDTEyMTPTSRP			LPPGEQGESEEDTEY*MTPTSRPVGVQKPEPK	4	873.902	15480	15486									15336	14833	50.3292	49.5723									49.6947	49.3264	3.8869	6.0169
232	230	Adaptor/scaffold	Cbl	CBL	§698	E3 ubiquitin-protein ligase CBL	P22682	http://www.phosphosite.org/proteinAction.do?id=1436&showAllSites=true	100.5	ESEEDTEyMTPTSRP			LPPGEQGESEEDTEY*MTPTSRPVGVQKPEPK	4	873.902	15398												50.1147												3.9972
233	231	Adaptor/scaffold	Cbl	CBL	366	E3 ubiquitin-protein ligase CBL	P22682	http://www.phosphosite.org/proteinAction.do?id=1436&showAllSites=true	100.5	IKVTQEQyELYCEMG			NQNPDLTGLCEPTPQDHIKVTQEQY*ELYCEMGSTFQLCK	4	1188.77									27935												84.1064												2.1214
234	232	Adaptor/scaffold	Cbl	CBL	369	E3 ubiquitin-protein ligase CBL	P22682	http://www.phosphosite.org/proteinAction.do?id=1436&showAllSites=true	100.5	TQEQYELyCEMGSTF			NQNPDLTGLCEPTPQDHIKVTQEQYELY*CEMGSTFQLCK	4	1188.77												27702												83.9307
235	233	Adaptor/scaffold	Cblb;Cblb	Cbl-b;Cbl-b iso 2	§889;737	E3 ubiquitin-protein ligase CBL-B	Q3TTA7;Q3TTA7-2	http://www.phosphosite.org/proteinAction.do?id=5045&showAllSites=true	109	ANRASQDyDQLPSSS			ASQDY*DQLPSSSDGSQAPARPPKPRPR	4	747.854		10634										10106		36.5477										36.6574		2.5016
236	234	Adaptor/scaffold	Cblb;Cblb;Cbl	Cbl-b;Cbl-b iso 2;CBL	363;211;369	E3 ubiquitin-protein ligase CBL-B	Q3TTA7;Q3TTA7-2;P22682	http://www.phosphosite.org/proteinAction.do?id=5045&showAllSites=true	109	TQEQYELyCEMGSTF			VTQEQYELY*CEMGSTFQLCK	3	865.36	28521									28651		28349	85.9712									85.7563		85.6612	1.5203									4.0658
237	235	Adaptor/scaffold	Cnksr2;Cnksr2	CNKSR2;CNKSR2 iso 2	§906, 911;857, 862	Connector enhancer of kinase suppressor of ras 2	Q80YA9;Q80YA9-2	http://www.phosphosite.org/proteinAction.do?id=6612&showAllSites=true	117.3	REEKLGDsLQDLYRA;GDSLQDLyRALEEAS			LGDS*LQDLY*RALEEASLSPLGEHR	3	943.767								36284												106.218												1.8041
238	236	Adaptor/scaffold	Cnksr2;Cnksr2	CNKSR2;CNKSR2 iso 2	415;366	Connector enhancer of kinase suppressor of ras 2	Q80YA9;Q80YA9-2	http://www.phosphosite.org/proteinAction.do?id=6612&showAllSites=true	117.3	EDTVLYCyEYEKGRS			FNIVEEDTVLYCY*EYEKGR	3	836.366		27829									27678	27326		82.6782									82.9832	82.9004		2.9236
239	237	Adaptor/scaffold	Cnksr2;Cnksr2	CNKSR2;CNKSR2 iso 2	417;368	Connector enhancer of kinase suppressor of ras 2	Q80YA9;Q80YA9-2	http://www.phosphosite.org/proteinAction.do?id=6612&showAllSites=true	117.3	TVLYCYEyEKGRSSS			RFNIVEEDTVLYCYEY*EKGR	3	888.4											24401												74.2137
240	238	Adaptor/scaffold	Cnksr2;Cnksr2	CNKSR2;CNKSR2 iso 2	452;403	Connector enhancer of kinase suppressor of ras 2	Q80YA9;Q80YA9-2	http://www.phosphosite.org/proteinAction.do?id=6612&showAllSites=true	117.3	EYNWVGDyEDPNKMK			LRPISMPVEYNWVGDY*EDPNKMK	3	954.439											26316	25954											79.3244	79.2042
241	239	Adaptor/scaffold	Cnksr2;Cnksr2	CNKSR2;CNKSR2 iso 2	452;403	Connector enhancer of kinase suppressor of ras 2	Q80YA9;Q80YA9-2	http://www.phosphosite.org/proteinAction.do?id=6612&showAllSites=true	117.3	EYNWVGDyEDPNKMK			LRPISMPVEYNWVGDY*EDPNKMKR	4	755.107	24462	24552			24556		24057		24296		24444	24088	74.99	73.8914			74.5739		74.4623		74.3461		74.3278	74.2134	2.1762	5.3593			3.747		2.5873		4.5575
242	240	Adaptor/scaffold	Cnksr2;Cnksr2	CNKSR2;CNKSR2 iso 2	452;403	Connector enhancer of kinase suppressor of ras 2	Q80YA9;Q80YA9-2	http://www.phosphosite.org/proteinAction.do?id=6612&showAllSites=true	117.3	EYNWVGDyEDPNKMK			LRPISMPVEYNWVGDY*EDPNKMKR	4	755.107												24064												74.1486
243	241	Adaptor/scaffold	Cnksr2;Cnksr2	CNKSR2;CNKSR2 iso 2	509;460	Connector enhancer of kinase suppressor of ras 2	Q80YA9;Q80YA9-2	http://www.phosphosite.org/proteinAction.do?id=6612&showAllSites=true	117.3	KSNSPAHySLLPSLQ			SNSPAHY*SLLPSLQMDALR	3	727.345		29393		28925				29163			29254	28916		86.866		86.9485				87.1172			87.2576	87.1787		3.4702		2.7925				2.6451
244	242	Adaptor/scaffold	Cnksr2;Cnksr2	CNKSR2;CNKSR2 iso 2	510;461	Connector enhancer of kinase suppressor of ras 2	Q80YA9;Q80YA9-2	http://www.phosphosite.org/proteinAction.do?id=6612&showAllSites=true	117.3	SNSPAHYsLLPSLQM			SNSPAHYS*LLPSLQMDALR	3	727.345			29030			29275									87.6457			87.0195									1.9968			2.9344
245	243	Adaptor/scaffold	Cnksr2;Cnksr2	CNKSR2;CNKSR2 iso 2	533, 542;484, 493	Connector enhancer of kinase suppressor of ras 2	Q80YA9;Q80YA9-2	http://www.phosphosite.org/proteinAction.do?id=6612&showAllSites=true	117.3	GTPVPETtLYHTFQQ;YHTFQQSsLQHKSKK			QDIMGTPVPETT*LYHTFQQSS*LQHK	3	1016.12		26417												78.8909												2.1126
246	244	Adaptor/scaffold	Cnksr2;Cnksr2	CNKSR2;CNKSR2 iso 2	533;484	Connector enhancer of kinase suppressor of ras 2	Q80YA9;Q80YA9-2	http://www.phosphosite.org/proteinAction.do?id=6612&showAllSites=true	117.3	GTPVPETtLYHTFQQ			QDIMGTPVPETT*LYHTFQQSSLQHK	3	989.463											25813												77.9804
247	245	Adaptor/scaffold	Cnksr2;Cnksr2	CNKSR2;CNKSR2 iso 2	586;537	Connector enhancer of kinase suppressor of ras 2	Q80YA9;Q80YA9-2	http://www.phosphosite.org/proteinAction.do?id=6612&showAllSites=true	117.3	KKKDAKSyFSQKWKK			SY*FSQKWK	2	577.258	14417		14032	13921							14283	13874	47.4572		47.0362	46.5379							46.8768	46.7519	1.6068		1.5161	1.9504
248	246	Adaptor/scaffold	Cnksr2;Cnksr2	CNKSR2;CNKSR2 iso 2	648;599	Connector enhancer of kinase suppressor of ras 2	Q80YA9;Q80YA9-2	http://www.phosphosite.org/proteinAction.do?id=6612&showAllSites=true	117.3	HPKIKSFyFAAEHLD			IKSFY*FAAEHLDDMNR	3	679.636		23762		23340							23658	23298		71.7822		71.9543							72.2264	72.1014		3.6463		3.1709
249	247	Adaptor/scaffold	Cnksr2;Cnksr2	CNKSR2;CNKSR2 iso 2	648;599	Connector enhancer of kinase suppressor of ras 2	Q80YA9;Q80YA9-2	http://www.phosphosite.org/proteinAction.do?id=6612&showAllSites=true	117.3	HPKIKSFyFAAEHLD			SFY*FAAEHLDDMNR	2	898.361		25410										24883		76.1832										76.3471		1.1193
250	248	Adaptor/scaffold	Cnksr2;Cnksr2	CNKSR2;CNKSR2 iso 2	648;599	Connector enhancer of kinase suppressor of ras 2	Q80YA9;Q80YA9-2	http://www.phosphosite.org/proteinAction.do?id=6612&showAllSites=true	117.3	HPKIKSFyFAAEHLD			SFY*FAAEHLDDMNR	3	599.243	25204	25390	24948	24915	25337	25226	24839		25097	25139	25240	24863	76.9973	76.1307	76.6649	76.1831	76.6724	76.2224	76.5675		76.4864	76.3431	76.4594	76.2948	1.0239	3.659	1.511	3.9975	2.971	3.6141	2.6893		2.9916	2.83
251	249	Adaptor/scaffold	Cnksr2;Cnksr2;Dsg3;Dsg3;Jrkl	CNKSR2;CNKSR2 iso 2;DSG3;DSG3 iso 2;JRKL	586;537;771;771;249	Connector enhancer of kinase suppressor of ras 2	Q80YA9;Q80YA9-2;O35902;O35902-2;B2RRL2	http://www.phosphosite.org/proteinAction.do?id=6612&showAllSites=true	117.3	KKKDAKSyFSQKWKK			SY*FSQK	2	420.17		8323		7871			7650	8010		8044	8126	7753		30.3021		30.263			30.1868	30.3173		30.3502	30.2772	30.279		1.4015		1.4479			1.0182	1.8075		1.0698
252	250	Adaptor/scaffold	Cnksr2;Cnksr2;Pheta2	CNKSR2;CNKSR2 iso 2;FAM109B	594;545;43	Connector enhancer of kinase suppressor of ras 2	Q80YA9;Q80YA9-2;Q14B98	http://www.phosphosite.org/proteinAction.do?id=6612&showAllSites=true	117.3	FSQKWKKyWFVLKDA			Y*WFVLK	2	468.225	30771	31008	30549	30520	30960	30859	30461	30737	30709	30768	30837	30496	92.0694	91.1856	91.7712	91.2249	91.7557	91.2736	91.6585	91.3424	91.5477	91.4271	91.526	91.4122	1.959	2.2343	1.9893	2.1092	2.4272	2.1901	2.1364	2.5575	2.0051	2.2968
253	251	Adaptor/scaffold	Crk	CRK	§194, §221	Adapter molecule crk	Q64010	http://www.phosphosite.org/proteinAction.do?id=1495&showAllSites=true	33.8	VEKYRPAsASVSALI;GGPEPGPyAQPSVNT	Abl	CRK	YRPAS*ASVSALIGGNQEGSHPQPLGGPEPGPY*AQPSVNTPLPNLQNGPIYAR	5	1097.13									29367												87.9404												4.7483
254	252	Adaptor/scaffold	Crk	CRK	§198, §221	Adapter molecule crk	Q64010	http://www.phosphosite.org/proteinAction.do?id=1495&showAllSites=true	33.8	RPASASVsALIGGNQ;GGPEPGPyAQPSVNT	Abl	CRK	YRPASASVS*ALIGGNQEGSHPQPLGGPEPGPY*AQPSVNTPLPNLQNGPIYAR	4	1371.16				29250												87.8171												4.3386
255	253	Adaptor/scaffold	Crk	CRK	§198, §221	Adapter molecule crk	Q64010	http://www.phosphosite.org/proteinAction.do?id=1495&showAllSites=true	33.8	RPASASVsALIGGNQ;GGPEPGPyAQPSVNT	Abl	CRK	YRPASASVS*ALIGGNQEGSHPQPLGGPEPGPY*AQPSVNTPLPNLQNGPIYAR	5	1097.13												29169												87.8461
256	254	Adaptor/scaffold	Crk	CRK	§208, §221	Adapter molecule crk	Q64010	http://www.phosphosite.org/proteinAction.do?id=1495&showAllSites=true	33.8	IGGNQEGsHPQPLGG;GGPEPGPyAQPSVNT	Abl	CRK	YRPASASVSALIGGNQEGS*HPQPLGGPEPGPY*AQPSVNTPLPNLQNGPIYAR	4	1371.16											29551												88.0443
257	255	Adaptor/scaffold	Crk	CRK	§221	Adapter molecule crk	Q64010	http://www.phosphosite.org/proteinAction.do?id=1495&showAllSites=true	33.8	GGPEPGPyAQPSVNT	Abl	CRK	IGGNQEGSHPQPLGGPEPGPY*AQPSVNTPLPNLQNGPIYAR	4	1075.52	26170								26126	26206	26237	25932	79.5794								79.2327	79.2	79.1176	79.145	3.1295								4.69	4.8808
258	256	Adaptor/scaffold	Crk	CRK	§221	Adapter molecule crk	Q64010	http://www.phosphosite.org/proteinAction.do?id=1495&showAllSites=true	33.8	GGPEPGPyAQPSVNT	Abl	CRK	YRPASASVSALIGGNQEGSHPQPLGGPEPGPY*AQPSVNTPLPN	4	1098.03							25497					25533							78.3265					78.0759							3.1496
259	257	Adaptor/scaffold	Crk	CRK	§221	Adapter molecule crk	Q64010	http://www.phosphosite.org/proteinAction.do?id=1495&showAllSites=true	33.8	GGPEPGPyAQPSVNT	Abl	CRK	YRPASASVSALIGGNQEGSHPQPLGGPEPGPY*AQPSVNTPLPNLQNGPIYAR	4	1351.17	39968	42385	27519	27408	27873	42547	27304	43286	27534	27617	27694	41972	117.893	123.102	83.5831	82.8991	83.4826	124.086	83.1782	127.626	83.0261	82.9957	83.0241	125.093	5.7611	3.3918	4.7201	5.0569	4.5361	3.8232	9.3201	2.0412	8.1071	7.9615
260	258	Adaptor/scaffold	Crk	CRK	§221	Adapter molecule crk	Q64010	http://www.phosphosite.org/proteinAction.do?id=1495&showAllSites=true	33.8	GGPEPGPyAQPSVNT	Abl	CRK	YRPASASVSALIGGNQEGSHPQPLGGPEPGPY*AQPSVNTPLPNLQNGPIYAR	4	1351.17	27608	27871	40780			27732	44207	43296		41854		27347	83.5346	82.7889	121.517			82.925	138.349	127.659		121.976		82.9554	8.9093	8.0258	2.1745			7.8254	3.9291	4.6449		6.4421
261	259	Adaptor/scaffold	Crk	CRK	§221	Adapter molecule crk	Q64010	http://www.phosphosite.org/proteinAction.do?id=1495&showAllSites=true	33.8	GGPEPGPyAQPSVNT	Abl	CRK	YRPASASVSALIGGNQEGSHPQPLGGPEPGPY*AQPSVNTPLPNLQNGPIYAR	4	1351.17	27808							27619					84.0708							82.9978					6.3451							4.7197
262	260	Adaptor/scaffold	Crk	CRK	§221	Adapter molecule crk	Q64010	http://www.phosphosite.org/proteinAction.do?id=1495&showAllSites=true	33.8	GGPEPGPyAQPSVNT	Abl	CRK	YRPASASVSALIGGNQEGSHPQPLGGPEPGPY*AQPSVNTPLPNLQNGPIYAR	4	1351.17	27596												83.499												4.3902
263	261	Adaptor/scaffold	Crk	CRK	§221	Adapter molecule crk	Q64010	http://www.phosphosite.org/proteinAction.do?id=1495&showAllSites=true	33.8	GGPEPGPyAQPSVNT	Abl	CRK	YRPASASVSALIGGNQEGSHPQPLGGPEPGPY*AQPSVNTPLPNLQNGPIYAR	5	1081.13	39996	42402	27432	27371		42548	28014	27600	27542	27643	27829	42029	117.969	123.151	83.352	82.7996		124.088	85.0686	82.9458	83.0477	83.0664	83.3875	125.246	4.1055	6.53	8.7989	8.8513		6.7863	4.6493	8.494	9.4069	7.838
264	262	Adaptor/scaffold	Crk	CRK	§221	Adapter molecule crk	Q64010	http://www.phosphosite.org/proteinAction.do?id=1495&showAllSites=true	33.8	GGPEPGPyAQPSVNT	Abl	CRK	YRPASASVSALIGGNQEGSHPQPLGGPEPGPY*AQPSVNTPLPNLQNGPIYAR	5	1081.13	27632					42524	27331						83.5963					124.016	83.2509						7.5647					3.6645	6.9289
265	263	Adaptor/scaffold	Crk	CRK	§221	Adapter molecule crk	Q64010	http://www.phosphosite.org/proteinAction.do?id=1495&showAllSites=true	33.8	GGPEPGPyAQPSVNT	Abl	CRK	YRPASASVSALIGGNQEGSHPQPLGGPEPGPY*AQPSVNTPLPNLQNGPIYAR	5	1081.13						27723												82.9012												9.341
266	264	Adaptor/scaffold	Crk	CRK	§221	Adapter molecule crk	Q64010	http://www.phosphosite.org/proteinAction.do?id=1495&showAllSites=true	33.8	GGPEPGPyAQPSVNT	Abl	CRK	YRPASASVSALIGGNQEGSHPQPLGGPEPGPY*AQPSVNTPLPNLQNGPIYAR	6	901.113							27338		27577	27641		27349							83.2718		83.1444	83.0616		82.9623							7.7796		7.5835	8.0478
267	265	Adaptor/scaffold	Crk	CRK	§221	Adapter molecule crk	Q64010	http://www.phosphosite.org/proteinAction.do?id=1495&showAllSites=true	33.8	GGPEPGPyAQPSVNT	Abl	CRK	YRPASASVSALIGGNQEGSHPQPLGGPEPGPY*AQPSVNTPLPNLQNGPIYAR	6	901.113										27660												83.1112												6.2489
268	266	Adaptor/scaffold	Crk	CRK	§221	Adapter molecule crk	Q64010	http://www.phosphosite.org/proteinAction.do?id=1495&showAllSites=true	33.8	GGPEPGPyAQPSVNT	Abl	CRK	YRPASASVSALIGGNQEGSHPQPLGGPEPGPY*AQPSVNTPLPNLQNGPIYAR	7	772.526		27923	27482	27415			27339		27576	27679	27753	27399		82.932	83.487	82.9179			83.2744		83.1419	83.1611	83.1862	83.0969		6.5865	5.0788	7.2551			8.1635		7.7637	5.9821
269	267	Adaptor/scaffold	Crk	CRK	§221	Adapter molecule crk	Q64010	http://www.phosphosite.org/proteinAction.do?id=1495&showAllSites=true	33.8	GGPEPGPyAQPSVNT	Abl	CRK	YRPASASVSALIGGNQEGSHPQPLGGPEPGPY*AQPSVNTPLPNLQNGPIYAR	7	772.526												27365												83.0068
270	268	Adaptor/scaffold	Crk	CRK	§221, §239	Adapter molecule crk	Q64010	http://www.phosphosite.org/proteinAction.do?id=1495&showAllSites=true	33.8	GGPEPGPyAQPSVNT;NLQNGPIyARVIQKR	Abl	CRK	YRPASASVSALIGGNQEGSHPQPLGGPEPGPY*AQPSVNTPLPNLQNGPIY*AR	4	1371.16			27851	27867	28185	28197			28046	28084		27796			84.4644	84.1227	84.3122	84.1564			84.4011	84.2435		84.1795			3.2944	6.3378	6.4019	7.6344			2.9527	6.8443
271	269	Adaptor/scaffold	Crk	CRK	§221, §239	Adapter molecule crk	Q64010	http://www.phosphosite.org/proteinAction.do?id=1495&showAllSites=true	33.8	GGPEPGPyAQPSVNT;NLQNGPIyARVIQKR	Abl	CRK	YRPASASVSALIGGNQEGSHPQPLGGPEPGPY*AQPSVNTPLPNLQNGPIY*AR	4	1371.16				27885	28177											84.1705	84.2905											6.9731	5.6536
272	270	Adaptor/scaffold	Crk	CRK	§221, §239	Adapter molecule crk	Q64010	http://www.phosphosite.org/proteinAction.do?id=1495&showAllSites=true	33.8	GGPEPGPyAQPSVNT;NLQNGPIyARVIQKR	Abl	CRK	YRPASASVSALIGGNQEGSHPQPLGGPEPGPY*AQPSVNTPLPNLQNGPIY*AR	5	1097.13	28039		27852	27894	28184	28200	27738	28077	28061	28091			84.6895		84.4688	84.1923	84.3098	84.1635	84.3336	84.2243	84.4414	84.2602			5.489		6.0646	6.0727	8.6395	8.6907	7.8532	8.9774	2.9158	7.7652
273	271	Adaptor/scaffold	Crk	CRK	§221, §239	Adapter molecule crk	Q64010	http://www.phosphosite.org/proteinAction.do?id=1495&showAllSites=true	33.8	GGPEPGPyAQPSVNT;NLQNGPIyARVIQKR	Abl	CRK	YRPASASVSALIGGNQEGSHPQPLGGPEPGPY*AQPSVNTPLPNLQNGPIY*AR	5	1097.13	28051												84.7205												4.7465
274	272	Adaptor/scaffold	Crk	CRK	§239	Adapter molecule crk	Q64010	http://www.phosphosite.org/proteinAction.do?id=1495&showAllSites=true	33.8	NLQNGPIyARVIQKR			YRPASASVSALIGGNQEGSHPQPLGGPEPGPYAQPSVNTPLPNLQNGPIY*AR	4	1351.17	27489	27751	27256	27214	27642	27529	27106	27388	27386	27393	27493	27149	83.1875	82.4684	82.8788	82.378	82.8666	82.384	82.6492	82.3809	82.633	82.4059	82.4921	82.4114	4.1111	2.778	4.6837	4.6076	3.2663	6.1371	4.8642	8.3215	2.6286	6.5582
275	273	Adaptor/scaffold	Crk	CRK	§239	Adapter molecule crk	Q64010	http://www.phosphosite.org/proteinAction.do?id=1495&showAllSites=true	33.8	NLQNGPIyARVIQKR			YRPASASVSALIGGNQEGSHPQPLGGPEPGPYAQPSVNTPLPNLQNGPIY*AR	4	1351.17	27418	27671											82.9984	82.257											5.7952	8.2806
276	274	Adaptor/scaffold	Crk	CRK	§239	Adapter molecule crk	Q64010	http://www.phosphosite.org/proteinAction.do?id=1495&showAllSites=true	33.8	NLQNGPIyARVIQKR			YRPASASVSALIGGNQEGSHPQPLGGPEPGPYAQPSVNTPLPNLQNGPIY*AR	5	1081.13	27436	27679	27235	27215	27654	27522	27131	27389			27524	27208	83.0461	82.2767	82.8219	82.3824	82.8999	82.3651	82.7162	82.3836			82.5748	82.5757	6.1122	9.4921	4.9425	10.1928	5.0526	9.3913	5.3245	10.871
277	275	Adaptor/scaffold	Crk	CRK	§239	Adapter molecule crk	Q64010	http://www.phosphosite.org/proteinAction.do?id=1495&showAllSites=true	33.8	NLQNGPIyARVIQKR			YRPASASVSALIGGNQEGSHPQPLGGPEPGPYAQPSVNTPLPNLQNGPIY*AR	5	1081.13					27636			27415			27564	27143					82.8518			82.4494			82.6791	82.3969					7.7881			6.6315
278	276	Adaptor/scaffold	Crk	CRK	§251	Adapter molecule crk	Q64010	http://www.phosphosite.org/proteinAction.do?id=1495&showAllSites=true	33.8	QKRVPNAyDKTALAL			RVPNAY*DKTALALEVGELVK	3	756.066	26720	26794	26547	26330	26822	26657	26374	26569	26599	26608	26698	26351	81.0566	79.9056	80.9521	79.9868	80.6591	80.0335	80.6724	80.1703	80.4938	80.293	80.3552	80.2612	3.8144	6.0976	2.9182	7.2092	4.1998	5.9808	5.7248	5.8735	5.9487	6.6244
279	277	Adaptor/scaffold	Crk	CRK	§251	Adapter molecule crk	Q64010	http://www.phosphosite.org/proteinAction.do?id=1495&showAllSites=true	33.8	QKRVPNAyDKTALAL			RVPNAY*DKTALALEVGELVK	3	756.066	26708		26470				26339						81.0259		80.7455				80.5795						3.4224		4.8918				5.2815
280	278	Adaptor/scaffold	Crk	CRK	§251	Adapter molecule crk	Q64010	http://www.phosphosite.org/proteinAction.do?id=1495&showAllSites=true	33.8	QKRVPNAyDKTALAL			VPNAY*DKTALALEVGELVK	3	704.033	29353	29537	29127	29064	29520	29401	29029	29272	29274	29315	29381	29032	88.2007	87.2456	87.9123	87.3193	87.8793	87.3557	87.7888	87.4101	87.6931	87.5308	87.5973	87.4829	3.0422	5.4771	3.5805	5.0025	4.614	5.7345	5.1101	4.3728	4.1841	4.1844
281	279	Adaptor/scaffold	Crk	CRK	§251	Adapter molecule crk	Q64010	http://www.phosphosite.org/proteinAction.do?id=1495&showAllSites=true	33.8	QKRVPNAyDKTALAL			VPNAY*DKTALALEVGELVK	3	704.033	29349												88.189												3.1401
282	280	Adaptor/scaffold	Crk	CRK	190, §239	Adapter molecule crk	Q64010	http://www.phosphosite.org/proteinAction.do?id=1495&showAllSites=true	33.8	PVPYVEKyRPASASV;NLQNGPIyARVIQKR			Y*RPASASVSALIGGNQEGSHPQPLGGPEPGPYAQPSVNTPLPNLQNGPIY*AR	4	1371.16												28932												87.2215
283	281	Adaptor/scaffold	Crk	CRK	196, §221	Adapter molecule crk	Q64010	http://www.phosphosite.org/proteinAction.do?id=1495&showAllSites=true	33.8	KYRPASAsVSALIGG;GGPEPGPyAQPSVNT	Abl	CRK	YRPASAS*VSALIGGNQEGSHPQPLGGPEPGPY*AQPSVNTPLPNLQNGPIYAR	4	1371.16		29702		29234		29556			29354	29439	29449	29150		87.687		87.7746		87.769			87.907	87.8578	87.7755	87.7941		5.7524		5.9058		6.0722			5.4281	5.5935
284	282	Adaptor/scaffold	Crk	CRK	196, §221	Adapter molecule crk	Q64010	http://www.phosphosite.org/proteinAction.do?id=1495&showAllSites=true	33.8	KYRPASAsVSALIGG;GGPEPGPyAQPSVNT	Abl	CRK	YRPASAS*VSALIGGNQEGSHPQPLGGPEPGPY*AQPSVNTPLPNLQNGPIYAR	4	1371.16											29480												87.8587
285	283	Adaptor/scaffold	Crk	CRK	196, §221	Adapter molecule crk	Q64010	http://www.phosphosite.org/proteinAction.do?id=1495&showAllSites=true	33.8	KYRPASAsVSALIGG;GGPEPGPyAQPSVNT	Abl	CRK	YRPASAS*VSALIGGNQEGSHPQPLGGPEPGPY*AQPSVNTPLPNLQNGPIYAR	5	1097.13						29560												87.7784												6.4499
286	284	Adaptor/scaffold	Crk;Crk	CRK;CRK iso3	§136;136	Adapter molecule crk	Q64010;Q64010-2	http://www.phosphosite.org/proteinAction.do?id=1495&showAllSites=true	33.8	LRQEEAEyVRALFDF			QEEAEY*VR	2	552.224										7693												29.3994												1.143
287	285	Adaptor/scaffold	Crk;Crk	CRK;CRK iso3	§136;136	Adapter molecule crk	Q64010;Q64010-2	http://www.phosphosite.org/proteinAction.do?id=1495&showAllSites=true	33.8	LRQEEAEyVRALFDF			QGSGVILRQEEAEY*VR	3	638.642	16289	16409	15958	15946	16328		15826	16140	16053	16117	16268	15887	52.6861	52.1058	52.3384	52.077	52.5079		52.2905	52.206	52.2465	52.1651	52.3071	52.252	1.5043	2.784	3.2059	3.3552	1.5255		2.3248	3.623	3.158	3.2793
288	286	Adaptor/scaffold	Crkl	CRKL	§195, §197	Crk-like protein	P47941	http://www.phosphosite.org/proteinAction.do?id=1497&showAllSites=true	33.8	GKHGNRNsNSYGIPE;HGNRNSNsYGIPEPA			HGNRNS*NS*YGIPEPAHAYAQPQTTTPLPTVASTPGAAINPLPSTQNGPVFAK	5	1100.33	26592								26548		26644		80.7108								80.3573		80.2023		4.5109								5.5665
289	287	Adaptor/scaffold	Crkl	CRKL	§195, §197	Crk-like protein	P47941	http://www.phosphosite.org/proteinAction.do?id=1497&showAllSites=true	33.8	GKHGNRNsNSYGIPE;HGNRNSNsYGIPEPA			HGNRNS*NS*YGIPEPAHAYAQPQTTTPLPTVASTPGAAINPLPSTQNGPVFAK	5	1100.33									26540		26656										80.3382		80.2362										4.7138
290	288	Adaptor/scaffold	Crkl	CRKL	§195, §197	Crk-like protein	P47941	http://www.phosphosite.org/proteinAction.do?id=1497&showAllSites=true	33.8	GKHGNRNsNSYGIPE;HGNRNSNsYGIPEPA			NS*NS*YGIPEPAHAYAQPQTTTPLPTVASTPGAAINPLPSTQNGPVFAK	4	1259.1		29892												88.2086												1.9481
291	289	Adaptor/scaffold	Crkl	CRKL	§195, §207	Crk-like protein	P47941	http://www.phosphosite.org/proteinAction.do?id=1497&showAllSites=true	33.8	GKHGNRNsNSYGIPE;IPEPAHAyAQPQTTT			HGNRNS*NSYGIPEPAHAY*AQPQTTTPLPTVASTPGAAINPLPSTQNGPVFAK	4	1375.16	26646	26926				26747							80.8573	80.2575				80.2743							4.6973	5.2945				6.2544
292	290	Adaptor/scaffold	Crkl	CRKL	§195, §207	Crk-like protein	P47941	http://www.phosphosite.org/proteinAction.do?id=1497&showAllSites=true	33.8	GKHGNRNsNSYGIPE;IPEPAHAyAQPQTTT			HGNRNS*NSYGIPEPAHAY*AQPQTTTPLPTVASTPGAAINPLPSTQNGPVFAK	5	1100.33				26398	26801		26287				26807					80.1697	80.602		80.4413				80.6433					6.1501	4.8278		6.7744
293	291	Adaptor/scaffold	Crkl	CRKL	§195, §207	Crk-like protein	P47941	http://www.phosphosite.org/proteinAction.do?id=1497&showAllSites=true	33.8	GKHGNRNsNSYGIPE;IPEPAHAyAQPQTTT			NS*NSYGIPEPAHAY*AQPQTTTPLPTVASTPGAAINPLPSTQNGPVFAK	4	1259.1											30377												90.2846
294	292	Adaptor/scaffold	Crkl	CRKL	§197	Crk-like protein	P47941	http://www.phosphosite.org/proteinAction.do?id=1497&showAllSites=true	33.8	HGNRNSNsYGIPEPA			NSNS*YGIPEPAHAYAQPQTTTPLPTVASTPGAAINPLPSTQNGPVFAK	4	1239.11		28877						28566	41812					85.4817						85.5287	122.59					4.1846						5.4259	1.354
295	293	Adaptor/scaffold	Crkl	CRKL	§197	Crk-like protein	P47941	http://www.phosphosite.org/proteinAction.do?id=1497&showAllSites=true	33.8	HGNRNSNsYGIPEPA			NSNS*YGIPEPAHAYAQPQTTTPLPTVASTPGAAINPLPSTQNGPVFAK	4	1239.11									28546												85.7384												1.9266
296	294	Adaptor/scaffold	Crkl	CRKL	§197	Crk-like protein	P47941	http://www.phosphosite.org/proteinAction.do?id=1497&showAllSites=true	33.8	HGNRNSNsYGIPEPA			SNS*YGIPEPAHAYAQPQTTTPLPTVASTPGAAINPLPSTQNGPVFAK	4	1210.6			28566												86.3911												1.5125
297	295	Adaptor/scaffold	Crkl	CRKL	§197, §198	Crk-like protein	P47941	http://www.phosphosite.org/proteinAction.do?id=1497&showAllSites=true	33.8	HGNRNSNsYGIPEPA;GNRNSNSyGIPEPAH			HGNRNSNS*Y*GIPEPAHAYAQPQTTTPLPTVASTPGAAINPLPSTQNGPVFAK	4	1375.16									26553			26312									80.3717			80.1548									1.9008
298	296	Adaptor/scaffold	Crkl	CRKL	§197, §198	Crk-like protein	P47941	http://www.phosphosite.org/proteinAction.do?id=1497&showAllSites=true	33.8	HGNRNSNsYGIPEPA;GNRNSNSyGIPEPAH			HGNRNSNS*Y*GIPEPAHAYAQPQTTTPLPTVASTPGAAINPLPSTQNGPVFAK	5	1100.33		26840						26578						80.0267						80.1948						6.0336						5.5958
299	297	Adaptor/scaffold	Crkl	CRKL	§197, §207	Crk-like protein	P47941	http://www.phosphosite.org/proteinAction.do?id=1497&showAllSites=true	33.8	HGNRNSNsYGIPEPA;IPEPAHAyAQPQTTT			HGNRNSNS*YGIPEPAHAY*AQPQTTTPLPTVASTPGAAINPLPSTQNGPVFAK	5	1100.33					26773				26582								80.5303				80.4486								6.604				6.8972
300	298	Adaptor/scaffold	Crkl	CRKL	§197, §207	Crk-like protein	P47941	http://www.phosphosite.org/proteinAction.do?id=1497&showAllSites=true	33.8	HGNRNSNsYGIPEPA;IPEPAHAyAQPQTTT			NSNS*YGIPEPAHAY*AQPQTTTPLPTVASTPGAAINPLPSTQNGPVFAK	4	1259.1		30682												90.3172												2.6912
301	299	Adaptor/scaffold	Crkl	CRKL	§198	Crk-like protein	P47941	http://www.phosphosite.org/proteinAction.do?id=1497&showAllSites=true	33.8	GNRNSNSyGIPEPAH			NSNSY*GIPEPAHAYAQPQTTTPLPTVASTPGAAINPLPSTQNGPVFAK	4	1239.11	28476		28317	28365	28717	28671	28222		28481		28594	28265	85.8519		85.7057	85.4526	85.7336	85.415	85.6288		85.5668		85.4718	85.4362	5.4248		5.5823	5.6904	5.1125	6.2454	6.9134		6.4596
302	300	Adaptor/scaffold	Crkl	CRKL	§198	Crk-like protein	P47941	http://www.phosphosite.org/proteinAction.do?id=1497&showAllSites=true	33.8	GNRNSNSyGIPEPAH			NSNSY*GIPEPAHAYAQPQTTTPLPTVASTPGAAINPLPSTQNGPVFAK	4	1239.11											28623												85.5523
303	301	Adaptor/scaffold	Crkl	CRKL	§198	Crk-like protein	P47941	http://www.phosphosite.org/proteinAction.do?id=1497&showAllSites=true	33.8	GNRNSNSyGIPEPAH			NSNSY*GIPEPAHAYAQPQTTTPLPTVASTPGAAINPLPSTQNGPVFAK	5	991.488	28510												85.9424												2.4435
304	302	Adaptor/scaffold	Crkl	CRKL	§198, §207	Crk-like protein	P47941	http://www.phosphosite.org/proteinAction.do?id=1497&showAllSites=true	33.8	GNRNSNSyGIPEPAH;IPEPAHAyAQPQTTT			HGNRNSNSY*GIPEPAHAY*AQPQTTTPLPTVASTPGAAINPLPSTQNGPVFAK	4	1375.16	26698	26877	26458		26824		26312		26628	26641	26765		80.9953	80.1243	80.7143		80.6639		80.5058		80.5706	80.3789	80.5338		1.652	5.3492	3.1453		4.4671		4.3802		2.2924	5.2324
305	303	Adaptor/scaffold	Crkl	CRKL	§198, §207	Crk-like protein	P47941	http://www.phosphosite.org/proteinAction.do?id=1497&showAllSites=true	33.8	GNRNSNSyGIPEPAH;IPEPAHAyAQPQTTT			HGNRNSNSY*GIPEPAHAY*AQPQTTTPLPTVASTPGAAINPLPSTQNGPVFAK	4	1375.16							26282												80.4268												3.8733
306	304	Adaptor/scaffold	Crkl	CRKL	§198, §207	Crk-like protein	P47941	http://www.phosphosite.org/proteinAction.do?id=1497&showAllSites=true	33.8	GNRNSNSyGIPEPAH;IPEPAHAyAQPQTTT			HGNRNSNSY*GIPEPAHAY*AQPQTTTPLPTVASTPGAAINPLPSTQNGPVFAK	5	1100.33	26644	26925	26486	26427			26329						80.8501	80.2531	80.7886	80.2454			80.5513						5.5084	3.9856	2.822	5.3799			4.2737
307	305	Adaptor/scaffold	Crkl	CRKL	§198, §212	Crk-like protein	P47941	http://www.phosphosite.org/proteinAction.do?id=1497&showAllSites=true	33.8	GNRNSNSyGIPEPAH;HAYAQPQtTTPLPTV			HGNRNSNSY*GIPEPAHAYAQPQT*TTPLPTVASTPGAAINPLPSTQNGPVFAK	4	1375.16	26691		26443										80.9766		80.6721										2.4763		4.0635
308	306	Adaptor/scaffold	Crkl	CRKL	§207	Crk-like protein	P47941	http://www.phosphosite.org/proteinAction.do?id=1497&showAllSites=true	33.8	IPEPAHAyAQPQTTT			NSNSYGIPEPAHAY*AQPQTTTPLPTVASTPGAAINPLPSTQNGPVFAK	4	1239.11	28593	42386	28517	29293	28840	28879	44102	29480	28627	28698	42713	41975	86.1625	123.106	86.2588	87.9311	86.0643	85.9644	137.964	87.9626	85.9532	85.8777	127.672	125.103	5.8637	4.7726	3.1083	2.8834	6.2565	3.2346	1.2582	4.8593	5.8191	6.627
309	307	Adaptor/scaffold	Crkl	CRKL	§207	Crk-like protein	P47941	http://www.phosphosite.org/proteinAction.do?id=1497&showAllSites=true	33.8	IPEPAHAyAQPQTTT			NSNSYGIPEPAHAY*AQPQTTTPLPTVASTPGAAINPLPSTQNGPVFAK	4	1239.11	28678		40924			42459	28356	28758		41760	28942	41984	86.3981		122.039			123.812	85.9818	86.0407		121.7	86.4218	125.127	3.9483		1.983			4.8043	6.761	2.83		3.109
310	308	Adaptor/scaffold	Crkl	CRKL	§207	Crk-like protein	P47941	http://www.phosphosite.org/proteinAction.do?id=1497&showAllSites=true	33.8	IPEPAHAyAQPQTTT			NSNSYGIPEPAHAY*AQPQTTTPLPTVASTPGAAINPLPSTQNGPVFAK	4	1239.11	39969		28627					43250			28830	28576	117.897		86.5548					127.494			86.113	86.2729	4.158		3.2677					1.7463
311	309	Adaptor/scaffold	Crkl	CRKL	§207	Crk-like protein	P47941	http://www.phosphosite.org/proteinAction.do?id=1497&showAllSites=true	33.8	IPEPAHAyAQPQTTT			NSNSYGIPEPAHAY*AQPQTTTPLPTVASTPGAAINPLPSTQNGPVFAK	4	1239.11			40880									28495			121.922									86.0545			5.2303
312	310	Adaptor/scaffold	Crkl	CRKL	§207	Crk-like protein	P47941	http://www.phosphosite.org/proteinAction.do?id=1497&showAllSites=true	33.8	IPEPAHAyAQPQTTT			NSNSYGIPEPAHAY*AQPQTTTPLPTVASTPGAAINPLPSTQNGPVFAK	5	991.488	28617	28989	28465	28496	28837	28843			28644	28783	28743	28399	86.2309	85.7855	86.118	85.8009	86.0571	85.8719			86.0032	86.1064	85.8772	85.7944	6.4127	7.4441	4.9967	6.3818	6.192	7.1448			5.9307	4.541
313	311	Adaptor/scaffold	Crkl	CRKL	§207	Crk-like protein	P47941	http://www.phosphosite.org/proteinAction.do?id=1497&showAllSites=true	33.8	IPEPAHAyAQPQTTT			NSNSYGIPEPAHAY*AQPQTTTPLPTVASTPGAAINPLPSTQNGPVFAK	5	991.488		28970	28486	28588	28866	28895				28727		28459		85.7314	86.1769	86.049	86.1347	86.0076				85.9535		85.9594		5.9125	4.811	3.7277	6.8677	4.2979				6.7688
314	312	Adaptor/scaffold	Crkl	CRKL	§207	Crk-like protein	P47941	http://www.phosphosite.org/proteinAction.do?id=1497&showAllSites=true	33.8	IPEPAHAyAQPQTTT			NSNSYGIPEPAHAY*AQPQTTTPLPTVASTPGAAINPLPSTQNGPVFAK	5	991.488					28899												86.2202												3.9497
315	313	Adaptor/scaffold	Crkl	CRKL	§207	Crk-like protein	P47941	http://www.phosphosite.org/proteinAction.do?id=1497&showAllSites=true	33.8	IPEPAHAyAQPQTTT			NSNSYGIPEPAHAY*AQPQTTTPLPTVASTPGAAINPLPSTQNGPVFAK	6	826.408	28646	29021					28404	28732	28664	28766		28468	86.3131	85.8722					86.1137	85.9737	86.0551	86.0633		85.9851	3.9746	4.4926					5.3937	5.0958	4.2588	4.6572
316	314	Adaptor/scaffold	Crkl	CRKL	§207	Crk-like protein	P47941	http://www.phosphosite.org/proteinAction.do?id=1497&showAllSites=true	33.8	IPEPAHAyAQPQTTT			NSNSYGIPEPAHAY*AQPQTTTPLPTVASTPGAAINPLPSTQNGPVFAK	6	826.408												28478												86.0114
317	315	Adaptor/scaffold	Crkl	CRKL	§207	Crk-like protein	P47941	http://www.phosphosite.org/proteinAction.do?id=1497&showAllSites=true	33.8	IPEPAHAyAQPQTTT			NSNSYGIPEPAHAY*AQPQTTTPLPTVASTPGAAINPLPSTQNGPVFAK	6	826.408												28436												85.8956
318	316	Adaptor/scaffold	Crkl	CRKL	§207	Crk-like protein	P47941	http://www.phosphosite.org/proteinAction.do?id=1497&showAllSites=true	33.8	IPEPAHAyAQPQTTT			SNSYGIPEPAHAY*AQPQTTTPLPTVASTPGAAINPLPSTQNGPVFAK	4	1210.6							28514												86.4039												2.9859
319	317	Adaptor/scaffold	Crkl	CRKL	§207, §212	Crk-like protein	P47941	http://www.phosphosite.org/proteinAction.do?id=1497&showAllSites=true	33.8	IPEPAHAyAQPQTTT;HAYAQPQtTTPLPTV			NSNSYGIPEPAHAY*AQPQT*TTPLPTVASTPGAAINPLPSTQNGPVFAK	4	1259.1	29325												88.1249												3.3499
320	318	Adaptor/scaffold	Crkl	CRKL	§207, §218	Crk-like protein	P47941	http://www.phosphosite.org/proteinAction.do?id=1497&showAllSites=true	33.8	IPEPAHAyAQPQTTT;QTTTPLPtVASTPGA			NSNSYGIPEPAHAY*AQPQTTTPLPT*VASTPGAAINPLPSTQNGPVFAK	4	1259.1						29665			29390									88.0608			88.0023									4.8071			4.287
321	319	Adaptor/scaffold	Crkl	CRKL	§207, §222	Crk-like protein	P47941	http://www.phosphosite.org/proteinAction.do?id=1497&showAllSites=true	33.8	IPEPAHAyAQPQTTT;PLPTVAStPGAAINP			NSNSYGIPEPAHAY*AQPQTTTPLPTVAST*PGAAINPLPSTQNGPVFAK	4	1259.1								29529		29541		29208								88.0949		88.1283		87.9483								4.1463		3.9187
322	320	Adaptor/scaffold	Crkl	CRKL	§207, §222	Crk-like protein	P47941	http://www.phosphosite.org/proteinAction.do?id=1497&showAllSites=true	33.8	IPEPAHAyAQPQTTT;PLPTVAStPGAAINP			NSNSYGIPEPAHAY*AQPQTTTPLPTVAST*PGAAINPLPSTQNGPVFAK	4	1259.1												29218												87.9741
323	321	Adaptor/scaffold	Crkl	CRKL	§251	Crk-like protein	P47941	http://www.phosphosite.org/proteinAction.do?id=1497&showAllSites=true	33.8	QKRVPCAyDKTALAL			RVPCAY*DKTALALEVGDIVK	3	766.724	25372	25444	25121	25014	25478	25307	24998	25226	25241	25245	25357	25001	77.4488	76.2734	77.1288	76.4481	77.0476	76.4385	76.9887	76.5641	76.8667	76.6235	76.7692	76.6586	3.1009	4.9803	4.2508	3.9138	5.0959	5.5241	4.6429	5.2315	5.3406	5.1637
324	322	Adaptor/scaffold	Crkl	CRKL	§251	Crk-like protein	P47941	http://www.phosphosite.org/proteinAction.do?id=1497&showAllSites=true	33.8	QKRVPCAyDKTALAL			RVPCAY*DKTALALEVGDIVK	3	766.724	25404									25264			77.5345									76.6736			3.1499									5.0669
325	323	Adaptor/scaffold	Ctnnd1	CTNND1	§904	Catenin delta-1	P30999	http://www.phosphosite.org/proteinAction.do?id=3337&showAllSites=true	104.9	TKSLDNNySTLNERG			SLDNNY*STLNER	2	753.317	12790	12973	12465	12523	12760	12705	12310	12642	12562	12647	12752	12362	43.0334	42.8265	42.7943	42.7906	42.9197	42.7524	42.7668	42.7559	42.7662	42.7513	42.7729	42.709	2.731	3.6312	3.3211	3.5222	2.54	3.5831	3.4475	3.4796	3.0146	3.4151
326	324	Adaptor/scaffold	Ctnnd1	CTNND1	§904	Catenin delta-1	P30999	http://www.phosphosite.org/proteinAction.do?id=3337&showAllSites=true	104.9	TKSLDNNySTLNERG			SLDNNY*STLNERGDHNR	3	695.631		8943	8482	8491		8678			8556	8649	8787	8324		31.9871	31.9985	31.9334		31.9734			31.9739	31.992	32.0579	31.8253		1.9198	1.755	1.3651		1.8942			1.0087	1.0174
327	325	Adaptor/scaffold	Ctnnd1;Ctnnd1	CTNND1 iso3;CTNND1 iso3	877;§883	Catenin delta-1	P30999-2;P30999-3	http://www.phosphosite.org/proteinAction.do?id=4247600&showAllSites=true	101.7	NQKSDNNySTLNERG			SDNNY*STLNER	2	696.775			8548				8356	8710	8628	8721	8858	8415			32.1764				32.0971	32.2132	32.1671	32.1853	32.248	32.0777			1.7783				2.009	2.2292	2.2028	1.8043
328	326	Adaptor/scaffold	Ctnnd1;Ctnnd1;Ctnnd1	CTNND1;CTNND1 iso3;CTNND1 iso3	§228;§228;§228	Catenin delta-1	P30999;P30999-2;P30999-3	http://www.phosphosite.org/proteinAction.do?id=3337&showAllSites=true	104.9	YPGGSDNyGSLSRVT	Src	CDH1	HYEDGYPGGSDNY*GSLSR	3	685.269	13176	13322	12850				12724	12980	12953	13010	13136	12743	44.092	43.7658	43.8655				43.8947	43.6582	43.8303	43.7169	43.8172	43.7251	3.279	5.0809	4.3072				2.1673	4.488	4.8005	5.3466
329	327	Adaptor/scaffold	Ctnnd1;Ctnnd1;Ctnnd1	CTNND1;CTNND1 iso3;CTNND1 iso3	§228;§228;§228	Catenin delta-1	P30999;P30999-2;P30999-3	http://www.phosphosite.org/proteinAction.do?id=3337&showAllSites=true	104.9	YPGGSDNyGSLSRVT	Src	CDH1	HYEDGYPGGSDNY*GSLSR	3	685.269										13029												43.7667												5.1103
330	328	Adaptor/scaffold	Ctnnd1;Ctnnd1;Ctnnd1	CTNND1;CTNND1 iso3;CTNND1 iso3	§257;§257;§257	Catenin delta-1	P30999;P30999-2;P30999-3	http://www.phosphosite.org/proteinAction.do?id=3337&showAllSites=true	104.9	APSRQDVyGPQPQVR	Src,PTP1B		APSRQDVY*GPQPQVR	3	593.284				10429												37.1628												2.3194
331	329	Adaptor/scaffold	Ctnnd1;Ctnnd1;Ctnnd1	CTNND1;CTNND1 iso3;CTNND1 iso3	§257;§257;§257	Catenin delta-1	P30999;P30999-2;P30999-3	http://www.phosphosite.org/proteinAction.do?id=3337&showAllSites=true	104.9	APSRQDVyGPQPQVR	Src,PTP1B		QDVY*GPQPQVR	2	683.811		12305		11798	12018				11808			11620		41.0395		40.8401	40.9328				40.7439			40.7154		1.7357		1.934	1.3979				2.1001
332	330	Adaptor/scaffold	Ctnnd1;Ctnnd1;Ctnnd1	CTNND1;CTNND1 iso3;CTNND1 iso3	§96;§96;§96	Catenin delta-1	P30999;P30999-2;P30999-3	http://www.phosphosite.org/proteinAction.do?id=3337&showAllSites=true	104.9	QDHNHLLySTIPRMQ	Src		LNGPQDHNHLLY*STIPR	3	685.665	18527	18573	18233	18123	18582	18399	18094	18350	18333	18340	18475	18082	58.8394	57.8875	58.5161	57.9242	58.5542	57.9868	58.4461	58.116	58.3668	58.1402	58.271	58.1402	2.915	4.1656	4.1425	3.8952	4.7578	4.5011	4.6333	4.9483	4.4092	4.2457
333	331	Adaptor/scaffold	Ctnnd1;Ctnnd1;Ctnnd1	CTNND1;CTNND1 iso3;CTNND1 iso3	§96;§96;§96	Catenin delta-1	P30999;P30999-2;P30999-3	http://www.phosphosite.org/proteinAction.do?id=3337&showAllSites=true	104.9	QDHNHLLySTIPRMQ	Src		LNGPQDHNHLLY*STIPR	3	685.665	18531												58.8514												3.4535
334	332	Adaptor/scaffold	Dab1;Dab1;Dab1;Dab1	DAB1;DAB1 iso3;DAB1 iso 8;DAB1 iso2	§232;232;197;§232	Disabled homolog 1	P97318;P97318-3;P97318-8;P97318-2	http://www.phosphosite.org/proteinAction.do?id=1266&showAllSites=true	63.5	SQKKEGVyDVPKSQP	Src,Fyn	NCK2	EGVY*DVPK	2	493.715	13199	13337	12876	12917	13150		12713		12957		13155	12767	44.1613	43.8041	43.9521	43.8477	43.9622		43.8665		43.8419		43.8716	43.789	2.1262	2.5496	1.8081	1.7264	2.0915		2.2206		2.3246
335	333	Adaptor/scaffold	Dab1;Dab1;Dab1;Dab1	DAB1;DAB1 iso3;DAB1 iso 8;DAB1 iso2	§232;232;197;§232	Disabled homolog 1	P97318;P97318-3;P97318-8;P97318-2	http://www.phosphosite.org/proteinAction.do?id=1266&showAllSites=true	63.5	SQKKEGVyDVPKSQP	Src,Fyn	NCK2	KEGVY*DVPK	2	557.763	9477	9493		9035		9211	8928	9215	9166	9232	9397	8953	33.9736	33.4609		33.3946		33.4025	33.6501	33.5665	33.6262	33.5651	33.7096	33.5403	2.0427	2.9532		2.0452		2.8562	2.3953	2.0119	2.2884	2.3948
336	334	Adaptor/scaffold	Dlg1;Dlg1;Dlg1	DLG1;DLG1 iso2;DLG1 iso3	§399;366;399	Disks large homolog 1	Q811D0;Q811D0-2;Q811D0-3	http://www.phosphosite.org/proteinAction.do?id=5282&showAllSites=true	100.1	KNTSDFVyLKVAKPT			LLAVNSVCLEEVTHEEAVTALKNTSDFVY*LK	4	893.945			34321												101.96												2.0274
337	335	Adaptor/scaffold	Dlg1;Dlg1;Dlg1	DLG1;DLG1 iso2;DLG1 iso3	§399;366;399	Disks large homolog 1	Q811D0;Q811D0-2;Q811D0-3	http://www.phosphosite.org/proteinAction.do?id=5282&showAllSites=true	100.1	KNTSDFVyLKVAKPT			LLAVNSVCLEEVTHEEAVTALKNTSDFVY*LK	4	893.945			34338												102.006												1.5614
338	336	Adaptor/scaffold	Dlg1;Dlg1;Dlg1	DLG1;DLG1 iso2;DLG1 iso3	§399;366;399	Disks large homolog 1	Q811D0;Q811D0-2;Q811D0-3	http://www.phosphosite.org/proteinAction.do?id=5282&showAllSites=true	100.1	KNTSDFVyLKVAKPT			LQIGDKLLAVNSVCLEEVTHEEAVTALKNTSDFVY*LK	4	1057.54									34998			34762									103.073			102.878									3.6189
339	337	Adaptor/scaffold	Dlg1;Dlg1;Dlg1	DLG1;DLG1 iso2;DLG1 iso3	§399;366;399	Disks large homolog 1	Q811D0;Q811D0-2;Q811D0-3	http://www.phosphosite.org/proteinAction.do?id=5282&showAllSites=true	100.1	KNTSDFVyLKVAKPT			NTSDFVY*LK	2	583.76	21883	22121	21631	21655	22005	21919	21525	21834	21768	21832	21924	21575	67.9733	67.3981	67.6717	67.4242	67.7321	67.3864	67.6551	67.5034	67.5861	67.5098	67.5505	67.4916	1.681	2.8606	2.3654	2.6444	2.4554	2.5703	2.5394	3.2414	2.6202	2.6752
340	338	Adaptor/scaffold	Dlg1;Dlg1;Dlg1	DLG1;DLG1 iso2;DLG1 iso3	§761;749;783	Disks large homolog 1	Q811D0;Q811D0-2;Q811D0-3	http://www.phosphosite.org/proteinAction.do?id=5282&showAllSites=true	100.1	YEVDGRDyHFVTSRE			DYEVDGRDY*HFVTSR	3	646.939		16019	15538	15544	15838	15783					15858	15449		50.9948	51.1151	50.9295	51.1701	50.9797					51.1248	50.9951		3.507	3.3237	3.4	3.459	3.8216
341	339	Adaptor/scaffold	Dlg1;Dlg1;Dlg1	DLG1;DLG1 iso2;DLG1 iso3	§761;749;783	Disks large homolog 1	Q811D0;Q811D0-2;Q811D0-3	http://www.phosphosite.org/proteinAction.do?id=5282&showAllSites=true	100.1	YEVDGRDyHFVTSRE			DYEVDGRDY*HFVTSR	3	646.939				15559								15444				50.9737								50.9744				3.7462
342	340	Adaptor/scaffold	Dlg1;Dlg1;Dlg1	DLG1;DLG1 iso2;DLG1 iso3	§761;749;783	Disks large homolog 1	Q811D0;Q811D0-2;Q811D0-3	http://www.phosphosite.org/proteinAction.do?id=5282&showAllSites=true	100.1	YEVDGRDyHFVTSRE			RDYEVDGRDY*HFVTSR	3	698.972		13664	13267	13241	13534	13449	13079	13410	13288	13418	13542	13121		44.6809	44.9921	44.7204	44.9799	44.7361	44.839	44.8124	44.7223	44.8079	44.9001	44.7349		3.0913	2.1146	3.1752	2.7656	3.6944	2.186	1.9185	2.2202	2.8589
343	341	Adaptor/scaffold	Dlg1;Dlg1;Dlg1	DLG1;DLG1 iso2;DLG1 iso3	§761;749;783	Disks large homolog 1	Q811D0;Q811D0-2;Q811D0-3	http://www.phosphosite.org/proteinAction.do?id=5282&showAllSites=true	100.1	YEVDGRDyHFVTSRE			RDYEVDGRDY*HFVTSR	4	524.481	13663	13653	13258	13239	13524	13442	13071	13403	13277	13410	13533	13122	45.4192	44.6523	44.9682	44.7132	44.9512	44.7168	44.8176	44.7918	44.6916	44.7866	44.8767	44.7373	1.4878	3.2692	3.59	3.1687	3.6228	3.5586	3.5027	3.5164	3.5244	3.0788
344	342	Adaptor/scaffold	Dlg1;Dlg1;Dlg1	DLG1;DLG1 iso2;DLG1 iso3	§761;749;783	Disks large homolog 1	Q811D0;Q811D0-2;Q811D0-3	http://www.phosphosite.org/proteinAction.do?id=5282&showAllSites=true	100.1	YEVDGRDyHFVTSRE			RDYEVDGRDY*HFVTSR	4	524.481	13588												45.2185												2.7262
345	343	Adaptor/scaffold	Dlg1;Dlg1;Dlg1	DLG1;DLG1 iso2;DLG1 iso3	790;778;812	Disks large homolog 1	Q811D0;Q811D0-2;Q811D0-3	http://www.phosphosite.org/proteinAction.do?id=5282&showAllSites=true	100.1	GQYNNHLyGTSVQSV			FIEAGQYNNHLY*GTSVQSVR	3	788.365												18433												59.0785
346	344	Adaptor/scaffold	Dlg1;Dlg1;Dlg1	DLG1;DLG1 iso2;DLG1 iso3	792;780;814	Disks large homolog 1	Q811D0;Q811D0-2;Q811D0-3	http://www.phosphosite.org/proteinAction.do?id=5282&showAllSites=true	100.1	YNNHLYGtSVQSVRA			FIEAGQYNNHLYGT*SVQSVR	3	788.365				18538							18806	18439				59.0255							59.1583	59.0952				1.1489
347	345	Adaptor/scaffold	Dlg1;Dlg2;Dlg2;Dlg2;Dlg2;Dlg2;Dlg2;Dlg2;Dlg4;Dlg4;Dlg4;Dlg1;Dlg1;Dlg2	DLG1;PSD-93;PSD-93 iso2;PSD-93 iso2;PSD-93 iso2;PSD-93 iso2;PSD-93 iso2;PSD-93 iso2;PSD-95;PSD-95 iso 2;PSD-95 iso 3;DLG1 iso2;DLG1 iso3;PSD-93 iso2	349;223;230;162;258;181;347;223;190;233;187;316;349;258	Disks large homolog 1	Q811D0;Q91XM9;Q91XM9-2;Q91XM9-3;Q91XM9-4;Q91XM9-6;Q91XM9-7;Q91XM9-8;Q62108;Q62108-2;Q62108-3;Q811D0-2;Q811D0-3;Q91XM9-5	http://www.phosphosite.org/proteinAction.do?id=5282&showAllSites=true	100.1	IPGDNSIyVTKIIEG			GLGFSIAGGVGNQHIPGDNSIY*VTK	3	861.086	26493	26662	26183	26180	26576	26498	26110	26407	26463	26422	26493	26142	80.4384	79.5525	79.9723	79.5751	79.9833	79.6106	79.9616	79.7245	80.1339	79.7834	79.8002	79.7033	4.9828	5.6802	4.6932	5.8835	5.8424	6.8689	5.6322	6.6287	4.2645	6.0126
348	346	Adaptor/scaffold	Dlg1;Dlg2;Dlg2;Dlg2;Dlg2;Dlg2;Dlg2;Dlg2;Dlg4;Dlg4;Dlg4;Dlg1;Dlg1;Dlg2	DLG1;PSD-93;PSD-93 iso2;PSD-93 iso2;PSD-93 iso2;PSD-93 iso2;PSD-93 iso2;PSD-93 iso2;PSD-95;PSD-95 iso 2;PSD-95 iso 3;DLG1 iso2;DLG1 iso3;PSD-93 iso2	349;223;230;162;258;181;347;223;190;233;187;316;349;258	Disks large homolog 1	Q811D0;Q91XM9;Q91XM9-2;Q91XM9-3;Q91XM9-4;Q91XM9-6;Q91XM9-7;Q91XM9-8;Q62108;Q62108-2;Q62108-3;Q811D0-2;Q811D0-3;Q91XM9-5	http://www.phosphosite.org/proteinAction.do?id=5282&showAllSites=true	100.1	IPGDNSIyVTKIIEG			GLGFSIAGGVGNQHIPGDNSIY*VTK	3	861.086	26417								26369	26411			80.2351								79.8801	79.7516			3.0432								5.5827	5.1317
349	347	Adaptor/scaffold	Dlg1;Dlg2;Dlg2;Dlg2;Dlg2;Dlg2;Dlg2;Dlg2;Dlg4;Dlg4;Dlg4;Dlg1;Dlg1;Dlg2	DLG1;PSD-93;PSD-93 iso2;PSD-93 iso2;PSD-93 iso2;PSD-93 iso2;PSD-93 iso2;PSD-93 iso2;PSD-95;PSD-95 iso 2;PSD-95 iso 3;DLG1 iso2;DLG1 iso3;PSD-93 iso2	349;223;230;162;258;181;347;223;190;233;187;316;349;258	Disks large homolog 1	Q811D0;Q91XM9;Q91XM9-2;Q91XM9-3;Q91XM9-4;Q91XM9-6;Q91XM9-7;Q91XM9-8;Q62108;Q62108-2;Q62108-3;Q811D0-2;Q811D0-3;Q91XM9-5	http://www.phosphosite.org/proteinAction.do?id=5282&showAllSites=true	100.1	IPGDNSIyVTKIIEG			GLGFSIAGGVGNQHIPGDNSIY*VTK	3	861.086	26618												80.7829												1.698
350	348	Adaptor/scaffold	Dlg1;Dlg4;Dlg4;Dlg4;Dlg1;Dlg1	DLG1;PSD-95;PSD-95 iso 2;PSD-95 iso 3;DLG1 iso2;DLG1 iso3	592;439;§482;436;559;592	Disks large homolog 1	Q811D0;Q62108;Q62108-2;Q62108-3;Q811D0-2;Q811D0-3	http://www.phosphosite.org/proteinAction.do?id=5282&showAllSites=true	100.1	YVRALFDyDKTKDSG			ALFDY*DKTK	2	590.768		15162		14737		14945				14928		14663		48.6857		48.7338		48.7518				48.8645		48.8669		1.4264		1.3193		1.2417				1.1551
351	349	Adaptor/scaffold	Dlg2;Dlg2;Dlg2;Dlg2	PSD-93 iso2;PSD-93;PSD-93 iso2;PSD-93 iso2	158, 170;16, §28;23, 35;16, 28	Disks large homolog 2	Q91XM9-7;Q91XM9;Q91XM9-2;Q91XM9-8	http://www.phosphosite.org/proteinAction.do?id=17674200&showAllSites=true	109.2	PVHHCTKyRYQDEDG;EDGPHDHsLPRLTHE			Y*RYQDEDGPHDHS*LPR	3	715.612							9522			9790		9516							35.2636			35.0565		35.0536							1.3586			1.1259
352	350	Adaptor/scaffold	Dlg2;Dlg2;Dlg2;Dlg2	PSD-93 iso2;PSD-93;PSD-93 iso2;PSD-93 iso2	158;16;23;16	Disks large homolog 2	Q91XM9-7;Q91XM9;Q91XM9-2;Q91XM9-8	http://www.phosphosite.org/proteinAction.do?id=17674200&showAllSites=true	109.2	PVHHCTKyRYQDEDG			Y*RYQDEDGPHDHSLPR	4	516.969		8974	8498	8505								8310		32.0713	32.0418	31.9717								31.7865		4.3353	1.2392	3.9732
353	351	Adaptor/scaffold	Dlg2;Dlg2;Dlg2;Dlg2	PSD-93 iso2;PSD-93;PSD-93 iso2;PSD-93 iso2	160, 170;18, §28;25, 35;18, 28	Disks large homolog 2	Q91XM9-7;Q91XM9;Q91XM9-2;Q91XM9-8	http://www.phosphosite.org/proteinAction.do?id=17674200&showAllSites=true	109.2	HHCTKYRyQDEDGPH;EDGPHDHsLPRLTHE			YRY*QDEDGPHDHS*LPR	3	715.612											9945												35.185
354	352	Adaptor/scaffold	Dlg2;Dlg2;Dlg2;Dlg2	PSD-93 iso2;PSD-93;PSD-93 iso2;PSD-93 iso2	160;18;25;18	Disks large homolog 2	Q91XM9-7;Q91XM9;Q91XM9-2;Q91XM9-8	http://www.phosphosite.org/proteinAction.do?id=17674200&showAllSites=true	109.2	HHCTKYRyQDEDGPH			Y*QDEDGPHDHSLPR	3	582.569		8336					7680		8004		8128			30.3354					30.2715		30.4789		30.2819			1.227					1.3478		1.0494
355	353	Adaptor/scaffold	Dlg2;Dlg2;Dlg2;Dlg2	PSD-93 iso2;PSD-93;PSD-93 iso2;PSD-93 iso2	200, 207;§58, §65;65, 72;58, 65	Disks large homolog 2	Q91XM9-7;Q91XM9;Q91XM9-2;Q91XM9-8	http://www.phosphosite.org/proteinAction.do?id=17674200&showAllSites=true	109.2	QIENVHGyVLQSHIS;YVLQSHIsPLKVNGT			NLSQIENVHGY*VLQSHIS*PLK	3	846.071	24189	24425	23955	23965	24336	24262	23871	24159	24100	24165	24261	23906	74.234	73.5514	73.984	73.628	73.9865	73.6292	73.9636	73.7078	73.8211	73.7299	73.8426	73.7303	3.7592	4.6719	4.8045	5.1139	5.2692	4.7866	4.5905	5.5539	4.9962	4.8187
356	354	Adaptor/scaffold	Dlg2;Dlg2;Dlg2;Dlg2	PSD-93 iso2;PSD-93;PSD-93 iso2;PSD-93 iso2	200, 207;§58, §65;65, 72;58, 65	Disks large homolog 2	Q91XM9-7;Q91XM9;Q91XM9-2;Q91XM9-8	http://www.phosphosite.org/proteinAction.do?id=17674200&showAllSites=true	109.2	QIENVHGyVLQSHIS;YVLQSHIsPLKVNGT			NLSQIENVHGY*VLQSHIS*PLK	4	634.805	24209	24447	23966	23979		24275	23873			24181	24265	23918	74.289	73.6115	74.0149	73.6665		73.6629	73.9708			73.7708	73.8545	73.7639	2.4093	3.938	2.917	2.5993		3.9562	3.2756			4.2629
357	355	Adaptor/scaffold	Dlg2;Dlg2;Dlg2;Dlg2	PSD-93 iso2;PSD-93;PSD-93 iso2;PSD-93 iso2	200;§58;65;58	Disks large homolog 2	Q91XM9-7;Q91XM9;Q91XM9-2;Q91XM9-8	http://www.phosphosite.org/proteinAction.do?id=17674200&showAllSites=true	109.2	QIENVHGyVLQSHIS			GPELVHVSEKNLSQIENVHGY*VLQSHISPLK	5	707.166		24131		23665										72.7683		72.8207										4.6823		2.7288
358	356	Adaptor/scaffold	Dlg2;Dlg2;Dlg2;Dlg2	PSD-93 iso2;PSD-93;PSD-93 iso2;PSD-93 iso2	200;§58;65;58	Disks large homolog 2	Q91XM9-7;Q91XM9;Q91XM9-2;Q91XM9-8	http://www.phosphosite.org/proteinAction.do?id=17674200&showAllSites=true	109.2	QIENVHGyVLQSHIS			NLSQIENVHGY*VLQSHISPLK	3	819.416	22911	23082	22689	22620	23025	22925	22552	22812	22779	22822	22922	22548	70.7712	69.9646	70.529	70.0215	70.4667	70.0703	70.407	70.1249	70.2827	70.1556	70.2476	70.1021	4.3688	4.84	4.3336	4.5012	5.3119	4.536	4.8008	4.944	5.4085	4.6777
359	357	Adaptor/scaffold	Dlg2;Dlg2;Dlg2;Dlg2	PSD-93 iso2;PSD-93;PSD-93 iso2;PSD-93 iso2	200;§58;65;58	Disks large homolog 2	Q91XM9-7;Q91XM9;Q91XM9-2;Q91XM9-8	http://www.phosphosite.org/proteinAction.do?id=17674200&showAllSites=true	109.2	QIENVHGyVLQSHIS			NLSQIENVHGY*VLQSHISPLK	3	819.416	23002				23042			22808					71.0146				70.5117			70.1127					3.152				4.5807			5.0288
360	358	Adaptor/scaffold	Dlg2;Dlg2;Dlg2;Dlg2	PSD-93 iso2;PSD-93;PSD-93 iso2;PSD-93 iso2	200;§58;65;58	Disks large homolog 2	Q91XM9-7;Q91XM9;Q91XM9-2;Q91XM9-8	http://www.phosphosite.org/proteinAction.do?id=17674200&showAllSites=true	109.2	QIENVHGyVLQSHIS			NLSQIENVHGY*VLQSHISPLK	4	614.814	22922		22701		23039			22827	22781	22828	22937	22567	70.8003		70.5627		70.5045			70.1632	70.2896	70.172	70.2883	70.15	4.2486		4.2013		4.453			3.7212	4.4034	4.4006
361	359	Adaptor/scaffold	Dlg2;Dlg2;Dlg2;Dlg2;Dlg2;Dlg2	PSD-93 iso2;PSD-93;PSD-93 iso2;PSD-93 iso2;PSD-93 iso2;PSD-93 iso2	629;§505;512;444;540;463	Disks large homolog 2	Q91XM9-7;Q91XM9;Q91XM9-2;Q91XM9-3;Q91XM9-4;Q91XM9-6	http://www.phosphosite.org/proteinAction.do?id=17674200&showAllSites=true	109.2	AQYQPEDyARFEAKI			GAGQTVTIIAQYQPEDY*AR	3	721.004								23661												72.382												1.7043
362	360	Adaptor/scaffold	Dlg2;Dlg2;Dlg2;Dlg2;Dlg2;Dlg2	PSD-93 iso2;PSD-93;PSD-93 iso2;PSD-93 iso2;PSD-93 iso2;PSD-93 iso2	629;§505;512;444;540;463	Disks large homolog 2	Q91XM9-7;Q91XM9;Q91XM9-2;Q91XM9-3;Q91XM9-4;Q91XM9-6	http://www.phosphosite.org/proteinAction.do?id=17674200&showAllSites=true	109.2	AQYQPEDyARFEAKI			GAGQTVTIIAQYQPEDY*ARFEAK	3	879.418							23794												73.7578												4.7536
363	361	Adaptor/scaffold	Dlg2;Dlg2;Dlg2;Dlg2;Dlg2;Dlg2;Dlg2	PSD-93 iso2;PSD-93;PSD-93 iso2;PSD-93 iso2;PSD-93 iso2;PSD-93 iso2;PSD-93 iso2	484, 488, 489;§360, §364, §365;367, 371, 372;299, 303, 304;395, 399, 400;318, 322, 323;360, 364, 365	Disks large homolog 2	Q91XM9-7;Q91XM9;Q91XM9-2;Q91XM9-3;Q91XM9-4;Q91XM9-6;Q91XM9-8	http://www.phosphosite.org/proteinAction.do?id=17674200&showAllSites=true	109.2	KLCDKPAsPRHYSPV;KPASPRHySPVECDK;PASPRHYsPVECDKS			LCDKPAS*PRHY*S*PVECDKSFLLSTPYPHYHLGLLPDSDMTSHSQHSTATR	6	996.94							23810					23833							73.8012					73.5372							5.5574
364	362	Adaptor/scaffold	Dlg2;Dlg2;Dlg2;Dlg2;Dlg2;Dlg2;Dlg2	PSD-93 iso2;PSD-93;PSD-93 iso2;PSD-93 iso2;PSD-93 iso2;PSD-93 iso2;PSD-93 iso2	488, 489, 496;§364, §365, 372;371, 372, 379;303, 304, 311;399, 400, 407;322, 323, 330;364, 365, 372	Disks large homolog 2	Q91XM9-7;Q91XM9;Q91XM9-2;Q91XM9-3;Q91XM9-4;Q91XM9-6;Q91XM9-8	http://www.phosphosite.org/proteinAction.do?id=17674200&showAllSites=true	109.2	KPASPRHySPVECDK;PASPRHYsPVECDKS;SPVECDKsFLLSTPY			LCDKPASPRHY*S*PVECDKS*FLLSTPYPHYHLGLLPDSDMTSHSQHSTATR	6	996.94	24249	24330											74.3957	73.3006											4.4486	2.516
365	363	Adaptor/scaffold	Dlg2;Dlg2;Dlg2;Dlg2;Dlg2;Dlg2;Dlg2	PSD-93 iso2;PSD-93;PSD-93 iso2;PSD-93 iso2;PSD-93 iso2;PSD-93 iso2;PSD-93 iso2	488, 489, 496;§364, §365, 372;371, 372, 379;303, 304, 311;399, 400, 407;322, 323, 330;364, 365, 372	Disks large homolog 2	Q91XM9-7;Q91XM9;Q91XM9-2;Q91XM9-3;Q91XM9-4;Q91XM9-6;Q91XM9-8	http://www.phosphosite.org/proteinAction.do?id=17674200&showAllSites=true	109.2	KPASPRHySPVECDK;PASPRHYsPVECDKS;SPVECDKsFLLSTPY			LCDKPASPRHY*S*PVECDKS*FLLSTPYPHYHLGLLPDSDMTSHSQHSTATR	6	996.94	24239												74.3662												4.4156
366	364	Adaptor/scaffold	Dlg2;Dlg2;Dlg2;Dlg2;Dlg2;Dlg2;Dlg2	PSD-93 iso2;PSD-93;PSD-93 iso2;PSD-93 iso2;PSD-93 iso2;PSD-93 iso2;PSD-93 iso2	488, 489;§364, §365;371, 372;303, 304;399, 400;322, 323;364, 365	Disks large homolog 2	Q91XM9-7;Q91XM9;Q91XM9-2;Q91XM9-3;Q91XM9-4;Q91XM9-6;Q91XM9-8	http://www.phosphosite.org/proteinAction.do?id=17674200&showAllSites=true	109.2	KPASPRHySPVECDK;PASPRHYsPVECDKS			HY*S*PVECDKSFLLSTPYPHYHLGLLPDSDM#TSHSQHSTATR	5	978.43				24153												74.137												6.8832
367	365	Adaptor/scaffold	Dlg2;Dlg2;Dlg2;Dlg2;Dlg2;Dlg2;Dlg2	PSD-93 iso2;PSD-93;PSD-93 iso2;PSD-93 iso2;PSD-93 iso2;PSD-93 iso2;PSD-93 iso2	488, 489;§364, §365;371, 372;303, 304;399, 400;322, 323;364, 365	Disks large homolog 2	Q91XM9-7;Q91XM9;Q91XM9-2;Q91XM9-3;Q91XM9-4;Q91XM9-6;Q91XM9-8	http://www.phosphosite.org/proteinAction.do?id=17674200&showAllSites=true	109.2	KPASPRHySPVECDK;PASPRHYsPVECDKS			HY*S*PVECDKSFLLSTPYPHYHLGLLPDSDMTSHSQHSTATR	5	975.231		25332		24876							25220	24862		75.9776		76.0808							76.407	76.2922		8.7377		8.0086
368	366	Adaptor/scaffold	Dlg2;Dlg2;Dlg2;Dlg2;Dlg2;Dlg2;Dlg2	PSD-93 iso2;PSD-93;PSD-93 iso2;PSD-93 iso2;PSD-93 iso2;PSD-93 iso2;PSD-93 iso2	488, 489;§364, §365;371, 372;303, 304;399, 400;322, 323;364, 365	Disks large homolog 2	Q91XM9-7;Q91XM9;Q91XM9-2;Q91XM9-3;Q91XM9-4;Q91XM9-6;Q91XM9-8	http://www.phosphosite.org/proteinAction.do?id=17674200&showAllSites=true	109.2	KPASPRHySPVECDK;PASPRHYsPVECDKS			HY*S*PVECDKSFLLSTPYPHYHLGLLPDSDMTSHSQHSTATR	5	975.231												24879												76.3374
369	367	Adaptor/scaffold	Dlg2;Dlg2;Dlg2;Dlg2;Dlg2;Dlg2;Dlg2	PSD-93 iso2;PSD-93;PSD-93 iso2;PSD-93 iso2;PSD-93 iso2;PSD-93 iso2;PSD-93 iso2	488, 489;§364, §365;371, 372;303, 304;399, 400;322, 323;364, 365	Disks large homolog 2	Q91XM9-7;Q91XM9;Q91XM9-2;Q91XM9-3;Q91XM9-4;Q91XM9-6;Q91XM9-8	http://www.phosphosite.org/proteinAction.do?id=17674200&showAllSites=true	109.2	KPASPRHySPVECDK;PASPRHYsPVECDKS			HY*S*PVECDKSFLLSTPYPHYHLGLLPDSDMTSHSQHSTATR	6	812.86		25331				25198				25131	25229	24868		75.9751				76.1484				76.3217	76.4285	76.3068		7.347				5.4616				5.1197
370	368	Adaptor/scaffold	Dlg2;Dlg2;Dlg2;Dlg2;Dlg2;Dlg2;Dlg2	PSD-93 iso2;PSD-93;PSD-93 iso2;PSD-93 iso2;PSD-93 iso2;PSD-93 iso2;PSD-93 iso2	488, 489;§364, §365;371, 372;303, 304;399, 400;322, 323;364, 365	Disks large homolog 2	Q91XM9-7;Q91XM9;Q91XM9-2;Q91XM9-3;Q91XM9-4;Q91XM9-6;Q91XM9-8	http://www.phosphosite.org/proteinAction.do?id=17674200&showAllSites=true	109.2	KPASPRHySPVECDK;PASPRHYsPVECDKS			HY*S*PVECDKSFLLSTPYPHYHLGLLPDSDMTSHSQHSTATR	6	812.86		25324				25205						24899		75.9564				76.1677						76.3899		7.4603				3.5327
371	369	Adaptor/scaffold	Dlg2;Dlg2;Dlg2;Dlg2;Dlg2;Dlg2;Dlg2	PSD-93 iso2;PSD-93;PSD-93 iso2;PSD-93 iso2;PSD-93 iso2;PSD-93 iso2;PSD-93 iso2	488;§364;371;303;399;322;364	Disks large homolog 2	Q91XM9-7;Q91XM9;Q91XM9-2;Q91XM9-3;Q91XM9-4;Q91XM9-6;Q91XM9-8	http://www.phosphosite.org/proteinAction.do?id=17674200&showAllSites=true	109.2	KPASPRHySPVECDK			HY*SPVECDKSFLLSTPYPHYHLGLLPDSDMTSHSQHSTATR	6	799.533	24359	24423	24095									23957	74.6974	73.5466	74.3602									73.869	3.0251	6.0609	2.8094
372	370	Adaptor/scaffold	Dlg2;Dlg2;Dlg2;Dlg2;Dlg2;Dlg2;Dlg2	PSD-93 iso2;PSD-93;PSD-93 iso2;PSD-93 iso2;PSD-93 iso2;PSD-93 iso2;PSD-93 iso2	488;§364;371;303;399;322;364	Disks large homolog 2	Q91XM9-7;Q91XM9;Q91XM9-2;Q91XM9-3;Q91XM9-4;Q91XM9-6;Q91XM9-8	http://www.phosphosite.org/proteinAction.do?id=17674200&showAllSites=true	109.2	KPASPRHySPVECDK			HY*SPVECDKSFLLSTPYPHYHLGLLPDSDMTSHSQHSTATR	6	799.533	24344												74.6577												3.4941
373	371	Adaptor/scaffold	Dlg2;Dlg2;Dlg2;Dlg2;Dlg2;Dlg2;Dlg2	PSD-93 iso2;PSD-93;PSD-93 iso2;PSD-93 iso2;PSD-93 iso2;PSD-93 iso2;PSD-93 iso2	489, 503, 530;§365, 379, §406;372, 386, 413;304, 318, 345;400, 414, 441;323, 337, 364;365, 379, 406	Disks large homolog 2	Q91XM9-7;Q91XM9;Q91XM9-2;Q91XM9-3;Q91XM9-4;Q91XM9-6;Q91XM9-8	http://www.phosphosite.org/proteinAction.do?id=17674200&showAllSites=true	109.2	PASPRHYsPVECDKS;SFLLSTPyPHYHLGL;STATRQPsVTLQRAI			HYS*PVECDKSFLLSTPY*PHYHLGLLPDSDMTSHSQHSTATRQPS*VTLQR	6	977.772	24646												75.488												1.438
374	372	Adaptor/scaffold	Dlg2;Dlg2;Dlg2;Dlg2;Dlg2;Dlg2;Dlg2	PSD-93 iso2;PSD-93;PSD-93 iso2;PSD-93 iso2;PSD-93 iso2;PSD-93 iso2;PSD-93 iso2	489, 506;§365, 382;372, 389;304, 321;400, 417;323, 340;365, 382	Disks large homolog 2	Q91XM9-7;Q91XM9;Q91XM9-2;Q91XM9-3;Q91XM9-4;Q91XM9-6;Q91XM9-8	http://www.phosphosite.org/proteinAction.do?id=17674200&showAllSites=true	109.2	PASPRHYsPVECDKS;LSTPYPHyHLGLLPD			HYS*PVECDKSFLLSTPYPHY*HLGLLPDSDMTSHSQHSTATR	5	975.231					24562	24402			24309		24854						74.5907	73.9987			74.3822		75.4199						4.3807	8.4742			5.9174
375	373	Adaptor/scaffold	Dlg2;Dlg2;Dlg2;Dlg2;Dlg2;Dlg2;Dlg2	PSD-93 iso2;PSD-93;PSD-93 iso2;PSD-93 iso2;PSD-93 iso2;PSD-93 iso2;PSD-93 iso2	489, 506;§365, 382;372, 389;304, 321;400, 417;323, 340;365, 382	Disks large homolog 2	Q91XM9-7;Q91XM9;Q91XM9-2;Q91XM9-3;Q91XM9-4;Q91XM9-6;Q91XM9-8	http://www.phosphosite.org/proteinAction.do?id=17674200&showAllSites=true	109.2	PASPRHYsPVECDKS;LSTPYPHyHLGLLPD			HYS*PVECDKSFLLSTPYPHY*HLGLLPDSDMTSHSQHSTATR	6	812.86									24300		24453										74.358		74.3496										6.5645
376	374	Adaptor/scaffold	Dlg2;Dlg2;Dlg2;Dlg2;Dlg2;Dlg2;Dlg2	PSD-93 iso2;PSD-93;PSD-93 iso2;PSD-93 iso2;PSD-93 iso2;PSD-93 iso2;PSD-93 iso2	489, 506;§365, 382;372, 389;304, 321;400, 417;323, 340;365, 382	Disks large homolog 2	Q91XM9-7;Q91XM9;Q91XM9-2;Q91XM9-3;Q91XM9-4;Q91XM9-6;Q91XM9-8	http://www.phosphosite.org/proteinAction.do?id=17674200&showAllSites=true	109.2	PASPRHYsPVECDKS;LSTPYPHyHLGLLPD			HYS*PVECDKSFLLSTPYPHY*HLGLLPDSDMTSHSQHSTATR	6	812.86											24448												74.3375
377	375	Adaptor/scaffold	Dlg2;Dlg2;Dlg2;Dlg2;Dlg2;Dlg2;Dlg2	PSD-93 iso2;PSD-93;PSD-93 iso2;PSD-93 iso2;PSD-93 iso2;PSD-93 iso2;PSD-93 iso2	489, 506;§365, 382;372, 389;304, 321;400, 417;323, 340;365, 382	Disks large homolog 2	Q91XM9-7;Q91XM9;Q91XM9-2;Q91XM9-3;Q91XM9-4;Q91XM9-6;Q91XM9-8	http://www.phosphosite.org/proteinAction.do?id=17674200&showAllSites=true	109.2	PASPRHYsPVECDKS;LSTPYPHyHLGLLPD			HYS*PVECDKSFLLSTPYPHY*HLGLLPDSDMTSHSQHSTATR	6	812.86											25270												76.5379
378	376	Adaptor/scaffold	Dlg2;Dlg2;Dlg2;Dlg2;Dlg2;Dlg2;Dlg2	PSD-93 iso2;PSD-93;PSD-93 iso2;PSD-93 iso2;PSD-93 iso2;PSD-93 iso2;PSD-93 iso2	506;382;389;321;417;340;382	Disks large homolog 2	Q91XM9-7;Q91XM9;Q91XM9-2;Q91XM9-3;Q91XM9-4;Q91XM9-6;Q91XM9-8	http://www.phosphosite.org/proteinAction.do?id=17674200&showAllSites=true	109.2	LSTPYPHyHLGLLPD			HYSPVECDKSFLLSTPYPHY*HLGLLPDSDMTSHSQHSTATR	5	959.238												23161												71.7386
379	377	Adaptor/scaffold	Dlg2;Dlg2;Dlg2;Dlg2;Dlg2;Dlg2;Dlg2	PSD-93 iso2;PSD-93;PSD-93 iso2;PSD-93 iso2;PSD-93 iso2;PSD-93 iso2;PSD-93 iso2	506;382;389;321;417;340;382	Disks large homolog 2	Q91XM9-7;Q91XM9;Q91XM9-2;Q91XM9-3;Q91XM9-4;Q91XM9-6;Q91XM9-8	http://www.phosphosite.org/proteinAction.do?id=17674200&showAllSites=true	109.2	LSTPYPHyHLGLLPD			HYSPVECDKSFLLSTPYPHY*HLGLLPDSDMTSHSQHSTATR	6	799.533	23527												72.4705												1.8365
380	378	Adaptor/scaffold	Dlg2;Dlg2;Dlg2;Dlg2;Dlg2;Dlg2;Dlg2	PSD-93 iso2;PSD-93;PSD-93 iso2;PSD-93 iso2;PSD-93 iso2;PSD-93 iso2;PSD-93 iso2	506;382;389;321;417;340;382	Disks large homolog 2	Q91XM9-7;Q91XM9;Q91XM9-2;Q91XM9-3;Q91XM9-4;Q91XM9-6;Q91XM9-8	http://www.phosphosite.org/proteinAction.do?id=17674200&showAllSites=true	109.2	LSTPYPHyHLGLLPD			SFLLSTPYPHY*HLGLLPDSDMTSHSQHSTATR	5	736.144											25296												76.6071
381	379	Adaptor/scaffold	Dlg2;Dlg2;Dlg2;Dlg2;Dlg2;Dlg2;Dlg2	PSD-93 iso2;PSD-93;PSD-93 iso2;PSD-93 iso2;PSD-93 iso2;PSD-93 iso2;PSD-93 iso2	760;§636;643;575;671;594;636	Disks large homolog 2	Q91XM9-7;Q91XM9;Q91XM9-2;Q91XM9-3;Q91XM9-4;Q91XM9-6;Q91XM9-8	http://www.phosphosite.org/proteinAction.do?id=17674200&showAllSites=true	109.2	PGLGDDGyGTKTLRG			FNAKPGVIDSKGDIPGLGDDGY*GTK	3	867.746	20306	20559	20055	20014	20415	20301	19905	20210	20177	20189	20316	19956	63.7028	63.2093	63.4417	62.9999	63.4674	63.0767	63.3176	63.1325	63.3011	63.0914	63.2259	63.1481	4.7305	2.5408	5.8105	5.7979	6.7711	6.4956	4.7119	6.7805	6.6715	6.1129
382	380	Adaptor/scaffold	Dlg2;Dlg2;Dlg2;Dlg2;Dlg2;Dlg2;Dlg2	PSD-93 iso2;PSD-93;PSD-93 iso2;PSD-93 iso2;PSD-93 iso2;PSD-93 iso2;PSD-93 iso2	760;§636;643;575;671;594;636	Disks large homolog 2	Q91XM9-7;Q91XM9;Q91XM9-2;Q91XM9-3;Q91XM9-4;Q91XM9-6;Q91XM9-8	http://www.phosphosite.org/proteinAction.do?id=17674200&showAllSites=true	109.2	PGLGDDGyGTKTLRG			FNAKPGVIDSKGDIPGLGDDGY*GTK	3	867.746	20386	20463	20110				19937						63.9268	62.9556	63.5884				63.4024						2.6305	6.2547	4.9236				6.9125
383	381	Adaptor/scaffold	Dlg2;Dlg2;Dlg2;Dlg2;Dlg2;Dlg2;Dlg2	PSD-93 iso2;PSD-93;PSD-93 iso2;PSD-93 iso2;PSD-93 iso2;PSD-93 iso2;PSD-93 iso2	760;§636;643;575;671;594;636	Disks large homolog 2	Q91XM9-7;Q91XM9;Q91XM9-2;Q91XM9-3;Q91XM9-4;Q91XM9-6;Q91XM9-8	http://www.phosphosite.org/proteinAction.do?id=17674200&showAllSites=true	109.2	PGLGDDGyGTKTLRG			FNAKPGVIDSKGDIPGLGDDGY*GTK	4	651.061	20330	20507	20070	20070	20429		19959		20191		20334	19987	63.7712	63.07	63.4819	63.1514	63.503		63.4593		63.3392		63.2732	63.2265	3.7463	5.6778	4.2387	3.5746	4.5834		2.9782		4.0557
384	382	Adaptor/scaffold	Dlg2;Dlg2;Dlg2;Dlg2;Dlg2;Dlg2;Dlg2	PSD-93 iso2;PSD-93;PSD-93 iso2;PSD-93 iso2;PSD-93 iso2;PSD-93 iso2;PSD-93 iso2	760;§636;643;575;671;594;636	Disks large homolog 2	Q91XM9-7;Q91XM9;Q91XM9-2;Q91XM9-3;Q91XM9-4;Q91XM9-6;Q91XM9-8	http://www.phosphosite.org/proteinAction.do?id=17674200&showAllSites=true	109.2	PGLGDDGyGTKTLRG			FNAKPGVIDSKGDIPGLGDDGY*GTKTLR	4	743.619		20172	19804	19738	20137	20019	19666	19955			20061	19695		62.1779	62.7639	62.2609	62.7229	62.3224	62.6789	62.4502			62.5445	62.4529		6.3774	4.0583	7.2807	6.7844	7.1005	5.2446	3.431
385	383	Adaptor/scaffold	Dlg2;Dlg2;Dlg2;Dlg2;Dlg2;Dlg2;Dlg2	PSD-93 iso2;PSD-93;PSD-93 iso2;PSD-93 iso2;PSD-93 iso2;PSD-93 iso2;PSD-93 iso2	760;§636;643;575;671;594;636	Disks large homolog 2	Q91XM9-7;Q91XM9;Q91XM9-2;Q91XM9-3;Q91XM9-4;Q91XM9-6;Q91XM9-8	http://www.phosphosite.org/proteinAction.do?id=17674200&showAllSites=true	109.2	PGLGDDGyGTKTLRG			GDIPGLGDDGY*GTK	2	722.803		19481	18937	19023	19303	19261	18807	19183	19096	19177	19280	18894		60.3248	60.4038	60.3437	60.4827	60.2762	60.3808	60.3705	60.4102	60.3803	60.4525	60.3144		2.922	3.054	2.9364	2.9854	2.706	3.1666	2.984	3.1609	3.0484
386	384	Adaptor/scaffold	Dlg2;Dlg2;Dlg2;Dlg2;Dlg2;Dlg2;Dlg2	PSD-93 iso2;PSD-93;PSD-93 iso2;PSD-93 iso2;PSD-93 iso2;PSD-93 iso2;PSD-93 iso2	760;§636;643;575;671;594;636	Disks large homolog 2	Q91XM9-7;Q91XM9;Q91XM9-2;Q91XM9-3;Q91XM9-4;Q91XM9-6;Q91XM9-8	http://www.phosphosite.org/proteinAction.do?id=17674200&showAllSites=true	109.2	PGLGDDGyGTKTLRG			GDIPGLGDDGY*GTKTLR	3	605.616		19751		19298	19672	19556	19187	19494		19484	19588	19231		61.053		61.0891	61.4769	61.0661	61.4012	61.214		61.2067	61.2806	61.2173		3.776		3.2959	3.491	4.1084	2.5961	3.1977		3.5917
387	385	Adaptor/scaffold	Dlg2;Dlg2;Dlg2;Dlg2;Dlg2;Dlg2;Dlg2	PSD-93 iso2;PSD-93;PSD-93 iso2;PSD-93 iso2;PSD-93 iso2;PSD-93 iso2;PSD-93 iso2	762;638;645;577;673;596;638	Disks large homolog 2	Q91XM9-7;Q91XM9;Q91XM9-2;Q91XM9-3;Q91XM9-4;Q91XM9-6;Q91XM9-8	http://www.phosphosite.org/proteinAction.do?id=17674200&showAllSites=true	109.2	LGDDGYGtKTLRGQE			GDIPGLGDDGYGT*KTLR	3	605.616	19566		19293						19474				61.7093		61.375						61.4284				2.7714		2.0794						2.4317
388	386	Adaptor/scaffold	Dlg2;Dlg2;Dlg2;Dlg2;Dlg2;Dlg2;Dlg2	PSD-93 iso2;PSD-93;PSD-93 iso2;PSD-93 iso2;PSD-93 iso2;PSD-93 iso2;PSD-93 iso2	832;§708;715;647;743;666;708	Disks large homolog 2	Q91XM9-7;Q91XM9;Q91XM9-2;Q91XM9-3;Q91XM9-4;Q91XM9-6;Q91XM9-8	http://www.phosphosite.org/proteinAction.do?id=17674200&showAllSites=true	109.2	YEVDGRDyHFVISRE			DY*HFVISR	2	558.747		17096												53.9456												1.6424
389	387	Adaptor/scaffold	Dlg2;Dlg2;Dlg2;Dlg2;Dlg2;Dlg2;Dlg2	PSD-93 iso2;PSD-93;PSD-93 iso2;PSD-93 iso2;PSD-93 iso2;PSD-93 iso2;PSD-93 iso2	832;§708;715;647;743;666;708	Disks large homolog 2	Q91XM9-7;Q91XM9;Q91XM9-2;Q91XM9-3;Q91XM9-4;Q91XM9-6;Q91XM9-8	http://www.phosphosite.org/proteinAction.do?id=17674200&showAllSites=true	109.2	YEVDGRDyHFVISRE			DYEVDGRDY*HFVISR	3	650.951	18950	19139	18665	18683	19027	18938	18547	18875	18791	18848	18954	18593	59.996	59.4065	59.6721	59.4275	59.7373	59.416	59.6567	59.5465	59.5918	59.5014	59.5597	59.5077	3.7602	4.1367	3.8162	4.268	4.1043	4.0255	4.078	4.3062	4.0037	4.1801
390	388	Adaptor/scaffold	Dlg2;Dlg2;Dlg2;Dlg2;Dlg2;Dlg2;Dlg2	PSD-93 iso2;PSD-93;PSD-93 iso2;PSD-93 iso2;PSD-93 iso2;PSD-93 iso2;PSD-93 iso2	832;§708;715;647;743;666;708	Disks large homolog 2	Q91XM9-7;Q91XM9;Q91XM9-2;Q91XM9-3;Q91XM9-4;Q91XM9-6;Q91XM9-8	http://www.phosphosite.org/proteinAction.do?id=17674200&showAllSites=true	109.2	YEVDGRDyHFVISRE			RDYEVDGRDY*HFVISR	3	702.985	16435	16494	16095	16051	16431	16271	15971	16243	16184	16236	16374	15961	53.085	52.3328	52.7016	52.3657	52.7826	52.3045	52.6739	52.4792	52.5923	52.4804	52.6067	52.4486	1.95	3.3308	3.3314	3.8758	3.327	3.2583	3.0895	3.0538	2.8617	3.5279
391	389	Adaptor/scaffold	Dlg2;Dlg2;Dlg2;Dlg2;Dlg2;Dlg2;Dlg2	PSD-93 iso2;PSD-93;PSD-93 iso2;PSD-93 iso2;PSD-93 iso2;PSD-93 iso2;PSD-93 iso2	832;§708;715;647;743;666;708	Disks large homolog 2	Q91XM9-7;Q91XM9;Q91XM9-2;Q91XM9-3;Q91XM9-4;Q91XM9-6;Q91XM9-8	http://www.phosphosite.org/proteinAction.do?id=17674200&showAllSites=true	109.2	YEVDGRDyHFVISRE			RDYEVDGRDY*HFVISR	4	527.49	16429	16492	16085	16040	16424	16267	15965	16239	16181	16228	16371	15954	53.0664	52.3281	52.6734	52.3352	52.7616	52.2949	52.6597	52.4697	52.5849	52.4588	52.5991	52.4299	3.6974	3.2404	3.6982	3.6494	3.2349	3.8736	3.638	3.7155	3.8194	3.6661
392	390	Adaptor/scaffold	Dlg2;Dlg2;Dlg2;Dlg2;Dlg2;Dlg2;Dlg2	PSD-93 iso2;PSD-93;PSD-93 iso2;PSD-93 iso2;PSD-93 iso2;PSD-93 iso2;PSD-93 iso2	856;§732;739;671;767;690;732	Disks large homolog 2	Q91XM9-7;Q91XM9;Q91XM9-2;Q91XM9-3;Q91XM9-4;Q91XM9-6;Q91XM9-8	http://www.phosphosite.org/proteinAction.do?id=17674200&showAllSites=true	109.2	KFIEAGQyNDNLYGT			FIEAGQY*NDNLYGTSVQSVR	2	1171.03												22108												68.9178
393	391	Adaptor/scaffold	Dlg2;Dlg2;Dlg2;Dlg2;Dlg2;Dlg2;Dlg2	PSD-93 iso2;PSD-93;PSD-93 iso2;PSD-93 iso2;PSD-93 iso2;PSD-93 iso2;PSD-93 iso2	856;§732;739;671;767;690;732	Disks large homolog 2	Q91XM9-7;Q91XM9;Q91XM9-2;Q91XM9-3;Q91XM9-4;Q91XM9-6;Q91XM9-8	http://www.phosphosite.org/proteinAction.do?id=17674200&showAllSites=true	109.2	KFIEAGQyNDNLYGT			FIEAGQY*NDNLYGTSVQSVR	3	781.021	22340	22695	22097	22211	22498	22496	22019	22385	22282	22362	22455	22093	69.2208	68.9307	68.9426	68.9163	69.0545	68.9253	68.9835	68.9727	68.9525	68.9218	68.9734	68.8771	2.5992	4.3536	4.0047	4.7492	3.9146	4.2757	4.8201	4.568	4.224	5.141
394	392	Adaptor/scaffold	Dlg2;Dlg2;Dlg2;Dlg2;Dlg2;Dlg2;Dlg2	PSD-93 iso2;PSD-93;PSD-93 iso2;PSD-93 iso2;PSD-93 iso2;PSD-93 iso2;PSD-93 iso2	861;§737;744;676;772;695;737	Disks large homolog 2	Q91XM9-7;Q91XM9;Q91XM9-2;Q91XM9-3;Q91XM9-4;Q91XM9-6;Q91XM9-8	http://www.phosphosite.org/proteinAction.do?id=17674200&showAllSites=true	109.2	GQYNDNLyGTSVQSV			FIEAGQYNDNLY*GTSVQSVR	2	1171.03	21456	21820	21213	21352		21604	21139	21484		21498	21577	21218	66.7975	66.5953	66.5538	66.6183		66.5448	66.6177	66.5654		66.6134	66.6144	66.5147	3.6314	5.5026	4.6869	5.2086		5.7213	4.6504	5.019		5.4075
395	393	Adaptor/scaffold	Dlg2;Dlg2;Dlg2;Dlg2;Dlg2;Dlg2;Dlg2	PSD-93 iso2;PSD-93;PSD-93 iso2;PSD-93 iso2;PSD-93 iso2;PSD-93 iso2;PSD-93 iso2	861;§737;744;676;772;695;737	Disks large homolog 2	Q91XM9-7;Q91XM9;Q91XM9-2;Q91XM9-3;Q91XM9-4;Q91XM9-6;Q91XM9-8	http://www.phosphosite.org/proteinAction.do?id=17674200&showAllSites=true	109.2	GQYNDNLyGTSVQSV			FIEAGQYNDNLY*GTSVQSVR	2	1171.03			21219												66.5702												4.5595
396	394	Adaptor/scaffold	Dlg2;Dlg2;Dlg2;Dlg2;Dlg2;Dlg2;Dlg2	PSD-93 iso2;PSD-93;PSD-93 iso2;PSD-93 iso2;PSD-93 iso2;PSD-93 iso2;PSD-93 iso2	861;§737;744;676;772;695;737	Disks large homolog 2	Q91XM9-7;Q91XM9;Q91XM9-2;Q91XM9-3;Q91XM9-4;Q91XM9-6;Q91XM9-8	http://www.phosphosite.org/proteinAction.do?id=17674200&showAllSites=true	109.2	GQYNDNLyGTSVQSV			FIEAGQYNDNLY*GTSVQSVR	3	781.021	21425	21799	21195	21340	21602	21584		21525		21489		21224	66.7163	66.5371	66.504	66.5865	66.6562	66.4917		66.6751		66.5896		66.5296	3.3943	5.824	5.4237	5.9268	5.7871	5.7062		3.1675		5.0781
397	395	Adaptor/scaffold	Dlg2;Dlg2;Dlg2;Dlg2;Dlg2;Dlg2;Dlg2	PSD-93 iso2;PSD-93;PSD-93 iso2;PSD-93 iso2;PSD-93 iso2;PSD-93 iso2;PSD-93 iso2	861;§737;744;676;772;695;737	Disks large homolog 2	Q91XM9-7;Q91XM9;Q91XM9-2;Q91XM9-3;Q91XM9-4;Q91XM9-6;Q91XM9-8	http://www.phosphosite.org/proteinAction.do?id=17674200&showAllSites=true	109.2	GQYNDNLyGTSVQSV			FIEAGQYNDNLY*GTSVQSVR	3	781.021								21478												66.5512												5.5874
398	396	Adaptor/scaffold	Dlg2;Dlg2;Dlg2;Dlg2;Dlg2;Dlg2;Dlg2	PSD-93 iso2;PSD-93;PSD-93 iso2;PSD-93 iso2;PSD-93 iso2;PSD-93 iso2;PSD-93 iso2	926;802;809;741;837;760;802	Disks large homolog 2	Q91XM9-7;Q91XM9;Q91XM9-2;Q91XM9-3;Q91XM9-4;Q91XM9-6;Q91XM9-8	http://www.phosphosite.org/proteinAction.do?id=17674200&showAllSites=true	109.2	EEQAKKTyDRAIKLE			LTEEQAKKTY*DR	3	521.247	4706	4957	4399	4537			4314	4490	4534	4483	4727		20.8612	21.1537	20.6885	21.0877			20.9948	20.7127	20.9506	20.7101	20.913		1.9864	2.5794	2.4097	2.3715			1.8787	2.3961	1.8354	1.6257
399	397	Adaptor/scaffold	Dlg2;Dlg2;Dlg2;Dlg2;Dlg2;Dlg2;Dlg2	PSD-93 iso2;PSD-93;PSD-93 iso2;PSD-93 iso2;PSD-93 iso2;PSD-93 iso2;PSD-93 iso2	939;815;822;754;850;773;815	Disks large homolog 2	Q91XM9-7;Q91XM9;Q91XM9-2;Q91XM9-3;Q91XM9-4;Q91XM9-6;Q91XM9-8	http://www.phosphosite.org/proteinAction.do?id=17674200&showAllSites=true	109.2	LEQEFGEyFTAIVQG			AIKLEQEFGEY*FTAIVQGDTLEDIYNQCK	3	1168.21							36407												107.637												3.209
400	398	Adaptor/scaffold	Dlg2;Dlg2;Dlg2;Dlg2;Dlg2;Dlg2;Dlg2	PSD-93 iso2;PSD-93;PSD-93 iso2;PSD-93 iso2;PSD-93 iso2;PSD-93 iso2;PSD-93 iso2	941;817;824;756;852;775;817	Disks large homolog 2	Q91XM9-7;Q91XM9;Q91XM9-2;Q91XM9-3;Q91XM9-4;Q91XM9-6;Q91XM9-8	http://www.phosphosite.org/proteinAction.do?id=17674200&showAllSites=true	109.2	QEFGEYFtAIVQGDT			AIKLEQEFGEYFT*AIVQGDTLEDIYNQCK	3	1168.21					36926												107.68												2.0973
401	399	Adaptor/scaffold	Dlg2;Dlg2;Dlg2;Dlg2;Dlg2;Dlg2;Dlg2	PSD-93 iso2;PSD-93;PSD-93 iso2;PSD-93 iso2;PSD-93 iso2;PSD-93 iso2;PSD-93 iso2	86;86;93;25;121;44;121	Disks large homolog 2	Q91XM9-8;Q91XM9;Q91XM9-2;Q91XM9-3;Q91XM9-4;Q91XM9-6;Q91XM9-5	http://www.phosphosite.org/proteinAction.do?id=17674200&showAllSites=true	95	DTLDTIPyVNGTEIE			ASPAPIIVNTDTLDTIPY*VNGTEIEYEFEEITLER	3	1344.98		38701			38522		37997	38388	38280		38415			111.922			111.985		111.925	111.912	111.912		111.898			4.7839			5.748		6.0478	6.0288	6.013
402	400	Adaptor/scaffold	Dlg2;Dlg2;Dlg2;Dlg2;Dlg2;Dlg2;Dlg2;Dlg2	PSD-93 iso2;PSD-93;PSD-93 iso2;PSD-93 iso2;PSD-93 iso2;PSD-93 iso2;PSD-93 iso2;PSD-93 iso2	397;273;280;212;308;231;273;308	Disks large homolog 2	Q91XM9-7;Q91XM9;Q91XM9-2;Q91XM9-3;Q91XM9-4;Q91XM9-6;Q91XM9-8;Q91XM9-5	http://www.phosphosite.org/proteinAction.do?id=17674200&showAllSites=true	109.2	KNTSDVVyLKVGKPT			NTSDVVY*LK	2	559.76				17299			17171									55.7139			55.9466									2.0396			1.5404
403	401	Adaptor/scaffold	Dlg2;Dlg2;Dlg2;Dlg2;Dlg2;Dlg2;Dlg2;Dlg2	PSD-93 iso2;PSD-93;PSD-93 iso2;PSD-93 iso2;PSD-93 iso2;PSD-93 iso2;PSD-93 iso2;PSD-93 iso2	407, 418, 431;283, 294, 307;290, 301, 314;222, 233, 246;318, 329, 342;241, 252, 265;283, 294, 307;318, 329, 342	Disks large homolog 2	Q91XM9-7;Q91XM9;Q91XM9-2;Q91XM9-3;Q91XM9-4;Q91XM9-6;Q91XM9-8;Q91XM9-5	http://www.phosphosite.org/proteinAction.do?id=17674200&showAllSites=true	109.2	VGKPTTIyMTDPYGP;PYGPPDItHSYSPPM;PMENHLLsGNNGTLE			VGKPTTIY*MTDPYGPPDIT*HSYSPPMENHLLS*GNNGTLEYK	4	1194.52												27681												83.8756
404	402	Adaptor/scaffold	Dlg2;Dlg2;Dlg2;Dlg2;Dlg2;Dlg2;Dlg2;Dlg2	PSD-93 iso2;PSD-93;PSD-93 iso2;PSD-93 iso2;PSD-93 iso2;PSD-93 iso2;PSD-93 iso2;PSD-93 iso2	407, 418;283, 294;290, 301;222, 233;318, 329;241, 252;283, 294;318, 329	Disks large homolog 2	Q91XM9-7;Q91XM9;Q91XM9-2;Q91XM9-3;Q91XM9-4;Q91XM9-6;Q91XM9-8;Q91XM9-5	http://www.phosphosite.org/proteinAction.do?id=17674200&showAllSites=true	109.2	VGKPTTIyMTDPYGP;PYGPPDItHSYSPPM			VGKPTTIY*MTDPYGPPDIT*HSYSPPM#ENHLLSGNNGTLEYK	4	1178.53							25047					25083							77.117					76.8765							2.2213
405	403	Adaptor/scaffold	Dlg2;Dlg2;Dlg2;Dlg2;Dlg2;Dlg2;Dlg2;Dlg2	PSD-93 iso2;PSD-93;PSD-93 iso2;PSD-93 iso2;PSD-93 iso2;PSD-93 iso2;PSD-93 iso2;PSD-93 iso2	407, 420;283, 296;290, 303;222, 235;318, 331;241, 254;283, 296;318, 331	Disks large homolog 2	Q91XM9-7;Q91XM9;Q91XM9-2;Q91XM9-3;Q91XM9-4;Q91XM9-6;Q91XM9-8;Q91XM9-5	http://www.phosphosite.org/proteinAction.do?id=17674200&showAllSites=true	109.2	VGKPTTIyMTDPYGP;GPPDITHsYSPPMEN			VGKPTTIY*MTDPYGPPDITHS*YSPPMENHLLSGNNGTLEYK	4	1174.53			26611							26860					81.1233							80.9682					2.1447							2.815
406	404	Adaptor/scaffold	Dlg2;Dlg2;Dlg2;Dlg2;Dlg2;Dlg2;Dlg2;Dlg2	PSD-93 iso2;PSD-93;PSD-93 iso2;PSD-93 iso2;PSD-93 iso2;PSD-93 iso2;PSD-93 iso2;PSD-93 iso2	407, 421, 436;283, 297, 312;290, 304, 319;222, 236, 251;318, 332, 347;241, 255, 270;283, 297, 312;318, 332, 347	Disks large homolog 2	Q91XM9-7;Q91XM9;Q91XM9-2;Q91XM9-3;Q91XM9-4;Q91XM9-6;Q91XM9-8;Q91XM9-5	http://www.phosphosite.org/proteinAction.do?id=17674200&showAllSites=true	109.2	VGKPTTIyMTDPYGP;PPDITHSySPPMENH;LLSGNNGtLEYKTSL			VGKPTTIY*MTDPYGPPDITHSY*SPPMENHLLSGNNGT*LEYK	4	1194.52												27692												83.9042
407	405	Adaptor/scaffold	Dlg2;Dlg2;Dlg2;Dlg2;Dlg2;Dlg2;Dlg2;Dlg2	PSD-93 iso2;PSD-93;PSD-93 iso2;PSD-93 iso2;PSD-93 iso2;PSD-93 iso2;PSD-93 iso2;PSD-93 iso2	407, 422;283, 298;290, 305;222, 237;318, 333;241, 256;283, 298;318, 333	Disks large homolog 2	Q91XM9-7;Q91XM9;Q91XM9-2;Q91XM9-3;Q91XM9-4;Q91XM9-6;Q91XM9-8;Q91XM9-5	http://www.phosphosite.org/proteinAction.do?id=17674200&showAllSites=true	109.2	VGKPTTIyMTDPYGP;PDITHSYsPPMENHL			VGKPTTIY*M#TDPYGPPDITHSYS*PPMENHLLSGNNGTLEYK	4	1178.53								25098												76.2251												1.8208
408	406	Adaptor/scaffold	Dlg2;Dlg2;Dlg2;Dlg2;Dlg2;Dlg2;Dlg2;Dlg2	PSD-93 iso2;PSD-93;PSD-93 iso2;PSD-93 iso2;PSD-93 iso2;PSD-93 iso2;PSD-93 iso2;PSD-93 iso2	407, 422;283, 298;290, 305;222, 237;318, 333;241, 256;283, 298;318, 333	Disks large homolog 2	Q91XM9-7;Q91XM9;Q91XM9-2;Q91XM9-3;Q91XM9-4;Q91XM9-6;Q91XM9-8;Q91XM9-5	http://www.phosphosite.org/proteinAction.do?id=17674200&showAllSites=true	109.2	VGKPTTIyMTDPYGP;PDITHSYsPPMENHL			VGKPTTIY*MTDPYGPPDITHSYS*PPMENHLLSGNNGTLEYK	4	1174.53						26918	26499											80.7309	81.0053											4.5741	3.7258
409	407	Adaptor/scaffold	Dlg2;Dlg2;Dlg2;Dlg2;Dlg2;Dlg2;Dlg2;Dlg2	PSD-93 iso2;PSD-93;PSD-93 iso2;PSD-93 iso2;PSD-93 iso2;PSD-93 iso2;PSD-93 iso2;PSD-93 iso2	407, 422;283, 298;290, 305;222, 237;318, 333;241, 256;283, 298;318, 333	Disks large homolog 2	Q91XM9-7;Q91XM9;Q91XM9-2;Q91XM9-3;Q91XM9-4;Q91XM9-6;Q91XM9-8;Q91XM9-5	http://www.phosphosite.org/proteinAction.do?id=17674200&showAllSites=true	109.2	VGKPTTIyMTDPYGP;PDITHSYsPPMENHL			VGKPTTIY*MTDPYGPPDITHSYS*PPMENHLLSGNNGTLEYK	5	939.823	26881											26553	81.4884											80.7954	1.1792
410	408	Adaptor/scaffold	Dlg2;Dlg2;Dlg2;Dlg2;Dlg2;Dlg2;Dlg2;Dlg2	PSD-93 iso2;PSD-93;PSD-93 iso2;PSD-93 iso2;PSD-93 iso2;PSD-93 iso2;PSD-93 iso2;PSD-93 iso2	407, 431;283, 307;290, 314;222, 246;318, 342;241, 265;283, 307;318, 342	Disks large homolog 2	Q91XM9-7;Q91XM9;Q91XM9-2;Q91XM9-3;Q91XM9-4;Q91XM9-6;Q91XM9-8;Q91XM9-5	http://www.phosphosite.org/proteinAction.do?id=17674200&showAllSites=true	109.2	VGKPTTIyMTDPYGP;PMENHLLsGNNGTLE			VGKPTTIY*M#TDPYGPPDITHSYSPPMENHLLS*GNNGTLEYK	4	1178.53				24859												76.0353												2.3818
411	409	Adaptor/scaffold	Dlg2;Dlg2;Dlg2;Dlg2;Dlg2;Dlg2;Dlg2;Dlg2	PSD-93 iso2;PSD-93;PSD-93 iso2;PSD-93 iso2;PSD-93 iso2;PSD-93 iso2;PSD-93 iso2;PSD-93 iso2	407, 431;283, 307;290, 314;222, 246;318, 342;241, 265;283, 307;318, 342	Disks large homolog 2	Q91XM9-7;Q91XM9;Q91XM9-2;Q91XM9-3;Q91XM9-4;Q91XM9-6;Q91XM9-8;Q91XM9-5	http://www.phosphosite.org/proteinAction.do?id=17674200&showAllSites=true	109.2	VGKPTTIyMTDPYGP;PMENHLLsGNNGTLE			VGKPTTIY*MTDPYGPPDITHSYSPPMENHLLS*GNNGTLEYK	4	1174.53					26967		26487	26780									81.0473		80.9743	80.7332									4.8162		3.7322	4.5297
412	410	Adaptor/scaffold	Dlg2;Dlg2;Dlg2;Dlg2;Dlg2;Dlg2;Dlg2;Dlg2	PSD-93 iso2;PSD-93;PSD-93 iso2;PSD-93 iso2;PSD-93 iso2;PSD-93 iso2;PSD-93 iso2;PSD-93 iso2	407, 431;283, 307;290, 314;222, 246;318, 342;241, 265;283, 307;318, 342	Disks large homolog 2	Q91XM9-7;Q91XM9;Q91XM9-2;Q91XM9-3;Q91XM9-4;Q91XM9-6;Q91XM9-8;Q91XM9-5	http://www.phosphosite.org/proteinAction.do?id=17674200&showAllSites=true	109.2	VGKPTTIyMTDPYGP;PMENHLLsGNNGTLE			VGKPTTIY*MTDPYGPPDITHSYSPPMENHLLS*GNNGTLEYK	5	939.823											26873												80.8205
413	411	Adaptor/scaffold	Dlg2;Dlg2;Dlg2;Dlg2;Dlg2;Dlg2;Dlg2;Dlg2	PSD-93 iso2;PSD-93;PSD-93 iso2;PSD-93 iso2;PSD-93 iso2;PSD-93 iso2;PSD-93 iso2;PSD-93 iso2	407, 436;283, 312;290, 319;222, 251;318, 347;241, 270;283, 312;318, 347	Disks large homolog 2	Q91XM9-7;Q91XM9;Q91XM9-2;Q91XM9-3;Q91XM9-4;Q91XM9-6;Q91XM9-8;Q91XM9-5	http://www.phosphosite.org/proteinAction.do?id=17674200&showAllSites=true	109.2	VGKPTTIyMTDPYGP;LLSGNNGtLEYKTSL			VGKPTTIY*M#TDPYGPPDITHSYSPPMENHLLSGNNGT*LEYK	4	1178.53		25349												76.0203												1.6287
414	412	Adaptor/scaffold	Dlg2;Dlg2;Dlg2;Dlg2;Dlg2;Dlg2;Dlg2;Dlg2	PSD-93 iso2;PSD-93;PSD-93 iso2;PSD-93 iso2;PSD-93 iso2;PSD-93 iso2;PSD-93 iso2;PSD-93 iso2	407, 436;283, 312;290, 319;222, 251;318, 347;241, 270;283, 312;318, 347	Disks large homolog 2	Q91XM9-7;Q91XM9;Q91XM9-2;Q91XM9-3;Q91XM9-4;Q91XM9-6;Q91XM9-8;Q91XM9-5	http://www.phosphosite.org/proteinAction.do?id=17674200&showAllSites=true	109.2	VGKPTTIyMTDPYGP;LLSGNNGtLEYKTSL			VGKPTTIY*MTDPYGPPDITHSYSPPM#ENHLLSGNNGT*LEYK	4	1178.53		25501												76.4244												1.3831
415	413	Adaptor/scaffold	Dlg2;Dlg2;Dlg2;Dlg2;Dlg2;Dlg2;Dlg2;Dlg2	PSD-93 iso2;PSD-93;PSD-93 iso2;PSD-93 iso2;PSD-93 iso2;PSD-93 iso2;PSD-93 iso2;PSD-93 iso2	407, 436;283, 312;290, 319;222, 251;318, 347;241, 270;283, 312;318, 347	Disks large homolog 2	Q91XM9-7;Q91XM9;Q91XM9-2;Q91XM9-3;Q91XM9-4;Q91XM9-6;Q91XM9-8;Q91XM9-5	http://www.phosphosite.org/proteinAction.do?id=17674200&showAllSites=true	109.2	VGKPTTIyMTDPYGP;LLSGNNGtLEYKTSL			VGKPTTIY*MTDPYGPPDITHSYSPPMENHLLSGNNGT*LEYK	4	1174.53	26781	27042				26892		26749			26848	26493	81.2213	80.5676				80.6623		80.6515			80.7532	80.6352	3.3438	5.8282				5.6055		4.4516
416	414	Adaptor/scaffold	Dlg2;Dlg2;Dlg2;Dlg2;Dlg2;Dlg2;Dlg2;Dlg2	PSD-93 iso2;PSD-93;PSD-93 iso2;PSD-93 iso2;PSD-93 iso2;PSD-93 iso2;PSD-93 iso2;PSD-93 iso2	407, 436;283, 312;290, 319;222, 251;318, 347;241, 270;283, 312;318, 347	Disks large homolog 2	Q91XM9-7;Q91XM9;Q91XM9-2;Q91XM9-3;Q91XM9-4;Q91XM9-6;Q91XM9-8;Q91XM9-5	http://www.phosphosite.org/proteinAction.do?id=17674200&showAllSites=true	109.2	VGKPTTIyMTDPYGP;LLSGNNGtLEYKTSL			VGKPTTIY*MTDPYGPPDITHSYSPPMENHLLSGNNGT*LEYK	4	1174.53	26793										26844		81.252										80.7414		3.3375
417	415	Adaptor/scaffold	Dlg2;Dlg2;Dlg2;Dlg2;Dlg2;Dlg2;Dlg2;Dlg2	PSD-93 iso2;PSD-93;PSD-93 iso2;PSD-93 iso2;PSD-93 iso2;PSD-93 iso2;PSD-93 iso2;PSD-93 iso2	407, 436;283, 312;290, 319;222, 251;318, 347;241, 270;283, 312;318, 347	Disks large homolog 2	Q91XM9-7;Q91XM9;Q91XM9-2;Q91XM9-3;Q91XM9-4;Q91XM9-6;Q91XM9-8;Q91XM9-5	http://www.phosphosite.org/proteinAction.do?id=17674200&showAllSites=true	109.2	VGKPTTIyMTDPYGP;LLSGNNGtLEYKTSL			VGKPTTIY*MTDPYGPPDITHSYSPPMENHLLSGNNGT*LEYK	5	939.823												26522												80.7146
418	416	Adaptor/scaffold	Dlg2;Dlg2;Dlg2;Dlg2;Dlg2;Dlg2;Dlg2;Dlg2	PSD-93 iso2;PSD-93;PSD-93 iso2;PSD-93 iso2;PSD-93 iso2;PSD-93 iso2;PSD-93 iso2;PSD-93 iso2	407, 436;283, 312;290, 319;222, 251;318, 347;241, 270;283, 312;318, 347	Disks large homolog 2	Q91XM9-7;Q91XM9;Q91XM9-2;Q91XM9-3;Q91XM9-4;Q91XM9-6;Q91XM9-8;Q91XM9-5	http://www.phosphosite.org/proteinAction.do?id=17674200&showAllSites=true	109.2	VGKPTTIyMTDPYGP;LLSGNNGtLEYKTSL			VGKPTTIY*MTDPYGPPDITHSYSPPMENHLLSGNNGT*LEYK	5	939.823												26512												80.6877
419	417	Adaptor/scaffold	Dlg2;Dlg2;Dlg2;Dlg2;Dlg2;Dlg2;Dlg2;Dlg2	PSD-93 iso2;PSD-93;PSD-93 iso2;PSD-93 iso2;PSD-93 iso2;PSD-93 iso2;PSD-93 iso2;PSD-93 iso2	407;283;290;222;318;241;283;318	Disks large homolog 2	Q91XM9-7;Q91XM9;Q91XM9-2;Q91XM9-3;Q91XM9-4;Q91XM9-6;Q91XM9-8;Q91XM9-5	http://www.phosphosite.org/proteinAction.do?id=17674200&showAllSites=true	109.2	VGKPTTIyMTDPYGP			VGKPTTIY*M#TDPYGPPDITHSYSPPMENHLLSGNNGTLEYK	4	1158.53		24312		23835				24067		24052	24142	23789		73.2529		73.2831				73.4646		73.4243	73.5261	73.4212		3.49		4.433				3.2913		4.0607
420	418	Adaptor/scaffold	Dlg2;Dlg2;Dlg2;Dlg2;Dlg2;Dlg2;Dlg2;Dlg2	PSD-93 iso2;PSD-93;PSD-93 iso2;PSD-93 iso2;PSD-93 iso2;PSD-93 iso2;PSD-93 iso2;PSD-93 iso2	407;283;290;222;318;241;283;318	Disks large homolog 2	Q91XM9-7;Q91XM9;Q91XM9-2;Q91XM9-3;Q91XM9-4;Q91XM9-6;Q91XM9-8;Q91XM9-5	http://www.phosphosite.org/proteinAction.do?id=17674200&showAllSites=true	109.2	VGKPTTIyMTDPYGP			VGKPTTIY*MTDPYGPPDITHSYSPPM#ENHLLSGNNGTLEYK	4	1158.53										24189												73.7924												3.2257
421	419	Adaptor/scaffold	Dlg2;Dlg2;Dlg2;Dlg2;Dlg2;Dlg2;Dlg2;Dlg2	PSD-93 iso2;PSD-93;PSD-93 iso2;PSD-93 iso2;PSD-93 iso2;PSD-93 iso2;PSD-93 iso2;PSD-93 iso2	407;283;290;222;318;241;283;318	Disks large homolog 2	Q91XM9-7;Q91XM9;Q91XM9-2;Q91XM9-3;Q91XM9-4;Q91XM9-6;Q91XM9-8;Q91XM9-5	http://www.phosphosite.org/proteinAction.do?id=17674200&showAllSites=true	109.2	VGKPTTIyMTDPYGP			VGKPTTIY*MTDPYGPPDITHSYSPPMENHLLSGNNGTLEYK	4	1154.54	25712	25973	25498	25466		25784	25419	25669	25654	25714	25756		78.3555	77.6804	78.1467	77.6557		77.7035	78.1133	77.7458	77.9644	77.8749	77.8264		5.1358	5.7212	5.6247	7.7355		9.0058	4.3934	7.9594	6.2983	6.1403
422	420	Adaptor/scaffold	Dlg2;Dlg2;Dlg2;Dlg2;Dlg2;Dlg2;Dlg2;Dlg2	PSD-93 iso2;PSD-93;PSD-93 iso2;PSD-93 iso2;PSD-93 iso2;PSD-93 iso2;PSD-93 iso2;PSD-93 iso2	407;283;290;222;318;241;283;318	Disks large homolog 2	Q91XM9-7;Q91XM9;Q91XM9-2;Q91XM9-3;Q91XM9-4;Q91XM9-6;Q91XM9-8;Q91XM9-5	http://www.phosphosite.org/proteinAction.do?id=17674200&showAllSites=true	109.2	VGKPTTIyMTDPYGP			VGKPTTIY*MTDPYGPPDITHSYSPPMENHLLSGNNGTLEYK	4	1154.54									25647												77.9452												6.6961
423	421	Adaptor/scaffold	Dlg2;Dlg2;Dlg2;Dlg2;Dlg2;Dlg2;Dlg2;Dlg2	PSD-93 iso2;PSD-93;PSD-93 iso2;PSD-93 iso2;PSD-93 iso2;PSD-93 iso2;PSD-93 iso2;PSD-93 iso2	407;283;290;222;318;241;283;318	Disks large homolog 2	Q91XM9-7;Q91XM9;Q91XM9-2;Q91XM9-3;Q91XM9-4;Q91XM9-6;Q91XM9-8;Q91XM9-5	http://www.phosphosite.org/proteinAction.do?id=17674200&showAllSites=true	109.2	VGKPTTIyMTDPYGP			VGKPTTIY*MTDPYGPPDITHSYSPPMENHLLSGNNGTLEYK	5	923.83	25736										25764		78.4174										77.8499		3.3547
424	422	Adaptor/scaffold	Dlg2;Dlg2;Dlg2;Dlg2;Dlg2;Dlg2;Dlg2;Dlg2	PSD-93 iso2;PSD-93;PSD-93 iso2;PSD-93 iso2;PSD-93 iso2;PSD-93 iso2;PSD-93 iso2;PSD-93 iso2	407;283;290;222;318;241;283;318	Disks large homolog 2	Q91XM9-7;Q91XM9;Q91XM9-2;Q91XM9-3;Q91XM9-4;Q91XM9-6;Q91XM9-8;Q91XM9-5	http://www.phosphosite.org/proteinAction.do?id=17674200&showAllSites=true	109.2	VGKPTTIyMTDPYGP			VGKPTTIY*MTDPYGPPDITHSYSPPMENHLLSGNNGTLEYK	5	923.83	25717												78.3673												4.2573
425	423	Adaptor/scaffold	Dlg2;Dlg2;Dlg2;Dlg2;Dlg2;Dlg2;Dlg2;Dlg2	PSD-93 iso2;PSD-93;PSD-93 iso2;PSD-93 iso2;PSD-93 iso2;PSD-93 iso2;PSD-93 iso2;PSD-93 iso2	409, 436;285, 312;292, 319;224, 251;320, 347;243, 270;285, 312;320, 347	Disks large homolog 2	Q91XM9-7;Q91XM9;Q91XM9-2;Q91XM9-3;Q91XM9-4;Q91XM9-6;Q91XM9-8;Q91XM9-5	http://www.phosphosite.org/proteinAction.do?id=17674200&showAllSites=true	109.2	KPTTIYMtDPYGPPD;LLSGNNGtLEYKTSL			VGKPTTIYMT*DPYGPPDITHSYSPPMENHLLSGNNGT*LEYK	4	1174.53			26596	26562											81.0823	80.6078											1.5593	3.1531
426	424	Adaptor/scaffold	Dlg2;Dlg2;Dlg2;Dlg2;Dlg2;Dlg2;Dlg2;Dlg2	PSD-93 iso2;PSD-93;PSD-93 iso2;PSD-93 iso2;PSD-93 iso2;PSD-93 iso2;PSD-93 iso2;PSD-93 iso2	409;285;292;224;320;243;285;320	Disks large homolog 2	Q91XM9-7;Q91XM9;Q91XM9-2;Q91XM9-3;Q91XM9-4;Q91XM9-6;Q91XM9-8;Q91XM9-5	http://www.phosphosite.org/proteinAction.do?id=17674200&showAllSites=true	109.2	KPTTIYMtDPYGPPD			VGKPTTIYM#T*DPYGPPDITHSYSPPMENHLLSGNNGTLEYK	4	1158.53			23870	23861					24004						73.7543	73.3521					73.5645						1.4857	1.8958					2.8044
427	425	Adaptor/scaffold	Dlg2;Dlg2;Dlg2;Dlg2;Dlg2;Dlg2;Dlg2;Dlg2	PSD-93 iso2;PSD-93;PSD-93 iso2;PSD-93 iso2;PSD-93 iso2;PSD-93 iso2;PSD-93 iso2;PSD-93 iso2	412, 418;288, 294;295, 301;227, 233;323, 329;246, 252;288, 294;323, 329	Disks large homolog 2	Q91XM9-7;Q91XM9;Q91XM9-2;Q91XM9-3;Q91XM9-4;Q91XM9-6;Q91XM9-8;Q91XM9-5	http://www.phosphosite.org/proteinAction.do?id=17674200&showAllSites=true	109.2	TIYMTDPyGPPDITH;PYGPPDItHSYSPPM			VGKPTTIYMTDPY*GPPDIT*HSYSPPMENHLLSGNNGTLEYK	4	1174.53		26483												79.0668												1.5992
428	426	Adaptor/scaffold	Dlg2;Dlg2;Dlg2;Dlg2;Dlg2;Dlg2;Dlg2;Dlg2	PSD-93 iso2;PSD-93;PSD-93 iso2;PSD-93 iso2;PSD-93 iso2;PSD-93 iso2;PSD-93 iso2;PSD-93 iso2	412, 421;288, 297;295, 304;227, 236;323, 332;246, 255;288, 297;323, 332	Disks large homolog 2	Q91XM9-7;Q91XM9;Q91XM9-2;Q91XM9-3;Q91XM9-4;Q91XM9-6;Q91XM9-8;Q91XM9-5	http://www.phosphosite.org/proteinAction.do?id=17674200&showAllSites=true	109.2	TIYMTDPyGPPDITH;PPDITHSySPPMENH			VGKPTTIYMTDPY*GPPDITHSY*SPPMENHLLSGNNGTLEYK	4	1174.53				25928												78.8915												1.957
429	427	Adaptor/scaffold	Dlg2;Dlg2;Dlg2;Dlg2;Dlg2;Dlg2;Dlg2;Dlg2	PSD-93 iso2;PSD-93;PSD-93 iso2;PSD-93 iso2;PSD-93 iso2;PSD-93 iso2;PSD-93 iso2;PSD-93 iso2	412, 422;288, 298;295, 305;227, 237;323, 333;246, 256;288, 298;323, 333	Disks large homolog 2	Q91XM9-7;Q91XM9;Q91XM9-2;Q91XM9-3;Q91XM9-4;Q91XM9-6;Q91XM9-8;Q91XM9-5	http://www.phosphosite.org/proteinAction.do?id=17674200&showAllSites=true	109.2	TIYMTDPyGPPDITH;PDITHSYsPPMENHL			VGKPTTIYMTDPY*GPPDITHSYS*PPMENHLLSGNNGTLEYK	4	1174.53									26090												79.1369												1.9409
430	428	Adaptor/scaffold	Dlg2;Dlg2;Dlg2;Dlg2;Dlg2;Dlg2;Dlg2;Dlg2	PSD-93 iso2;PSD-93;PSD-93 iso2;PSD-93 iso2;PSD-93 iso2;PSD-93 iso2;PSD-93 iso2;PSD-93 iso2	412, 436;288, 312;295, 319;227, 251;323, 347;246, 270;288, 312;323, 347	Disks large homolog 2	Q91XM9-7;Q91XM9;Q91XM9-2;Q91XM9-3;Q91XM9-4;Q91XM9-6;Q91XM9-8;Q91XM9-5	http://www.phosphosite.org/proteinAction.do?id=17674200&showAllSites=true	109.2	TIYMTDPyGPPDITH;LLSGNNGtLEYKTSL			VGKPTTIYMTDPY*GPPDITHSYSPPMENHLLSGNNGT*LEYK	4	1174.53		26401									26174			78.8482									78.9472			4.2392
431	429	Adaptor/scaffold	Dlg2;Dlg2;Dlg2;Dlg2;Dlg2;Dlg2;Dlg2;Dlg2	PSD-93 iso2;PSD-93;PSD-93 iso2;PSD-93 iso2;PSD-93 iso2;PSD-93 iso2;PSD-93 iso2;PSD-93 iso2	412;288;295;227;323;246;288;323	Disks large homolog 2	Q91XM9-7;Q91XM9;Q91XM9-2;Q91XM9-3;Q91XM9-4;Q91XM9-6;Q91XM9-8;Q91XM9-5	http://www.phosphosite.org/proteinAction.do?id=17674200&showAllSites=true	109.2	TIYMTDPyGPPDITH			VGKPTTIYMTDPY*GPPDITHSYSPPMENHLLSGNNGTLEYK	4	1154.54	25157											24833	76.8721											76.2161	1.9881
432	430	Adaptor/scaffold	Dlg2;Dlg2;Dlg2;Dlg2;Dlg2;Dlg2;Dlg2;Dlg2	PSD-93 iso2;PSD-93;PSD-93 iso2;PSD-93 iso2;PSD-93 iso2;PSD-93 iso2;PSD-93 iso2;PSD-93 iso2	412;288;295;227;323;246;288;323	Disks large homolog 2	Q91XM9-7;Q91XM9;Q91XM9-2;Q91XM9-3;Q91XM9-4;Q91XM9-6;Q91XM9-8;Q91XM9-5	http://www.phosphosite.org/proteinAction.do?id=17674200&showAllSites=true	109.2	TIYMTDPyGPPDITH			VGKPTTIYMTDPY*GPPDITHSYSPPMENHLLSGNNGTLEYK	4	1154.54	25173											24829	76.9122											76.2045	2.2678
433	431	Adaptor/scaffold	Dlg2;Dlg2;Dlg2;Dlg2;Dlg2;Dlg2;Dlg2;Dlg2	PSD-93 iso2;PSD-93;PSD-93 iso2;PSD-93 iso2;PSD-93 iso2;PSD-93 iso2;PSD-93 iso2;PSD-93 iso2	412;288;295;227;323;246;288;323	Disks large homolog 2	Q91XM9-7;Q91XM9;Q91XM9-2;Q91XM9-3;Q91XM9-4;Q91XM9-6;Q91XM9-8;Q91XM9-5	http://www.phosphosite.org/proteinAction.do?id=17674200&showAllSites=true	109.2	TIYMTDPyGPPDITH			VGKPTTIYMTDPY*GPPDITHSYSPPMENHLLSGNNGTLEYK	5	923.83		25366										24837		76.0657										76.2259		4.5312
434	432	Adaptor/scaffold	Dlg2;Dlg2;Dlg2;Dlg2;Dlg2;Dlg2;Dlg2;Dlg2	PSD-93 iso2;PSD-93;PSD-93 iso2;PSD-93 iso2;PSD-93 iso2;PSD-93 iso2;PSD-93 iso2;PSD-93 iso2	412;288;295;227;323;246;288;323	Disks large homolog 2	Q91XM9-7;Q91XM9;Q91XM9-2;Q91XM9-3;Q91XM9-4;Q91XM9-6;Q91XM9-8;Q91XM9-5	http://www.phosphosite.org/proteinAction.do?id=17674200&showAllSites=true	109.2	TIYMTDPyGPPDITH			VGKPTTIYMTDPY*GPPDITHSYSPPMENHLLSGNNGTLEYK	5	923.83												24854												76.271
435	433	Adaptor/scaffold	Dlg2;Dlg2;Dlg2;Dlg2;Dlg2;Dlg2;Dlg2;Dlg2	PSD-93 iso2;PSD-93;PSD-93 iso2;PSD-93 iso2;PSD-93 iso2;PSD-93 iso2;PSD-93 iso2;PSD-93 iso2	412;288;295;227;323;246;288;323	Disks large homolog 2	Q91XM9-7;Q91XM9;Q91XM9-2;Q91XM9-3;Q91XM9-4;Q91XM9-6;Q91XM9-8;Q91XM9-5	http://www.phosphosite.org/proteinAction.do?id=17674200&showAllSites=true	109.2	TIYMTDPyGPPDITH			VGKPTTIYMTDPY*GPPDITHSYSPPMENHLLSGNNGTLEYK	5	923.83												24847												76.2521
436	434	Adaptor/scaffold	Dlg2;Dlg2;Dlg2;Dlg2;Dlg2;Dlg2;Dlg2;Dlg2	PSD-93 iso2;PSD-93;PSD-93 iso2;PSD-93 iso2;PSD-93 iso2;PSD-93 iso2;PSD-93 iso2;PSD-93 iso2	420, 431;296, 307;303, 314;235, 246;331, 342;254, 265;296, 307;331, 342	Disks large homolog 2	Q91XM9-7;Q91XM9;Q91XM9-2;Q91XM9-3;Q91XM9-4;Q91XM9-6;Q91XM9-8;Q91XM9-5	http://www.phosphosite.org/proteinAction.do?id=17674200&showAllSites=true	109.2	GPPDITHsYSPPMEN;PMENHLLsGNNGTLE			VGKPTTIYMTDPYGPPDITHS*YSPPMENHLLS*GNNGTLEYK	4	1174.53											26152												78.8899
437	435	Adaptor/scaffold	Dlg2;Dlg2;Dlg2;Dlg2;Dlg2;Dlg2;Dlg2;Dlg2	PSD-93 iso2;PSD-93;PSD-93 iso2;PSD-93 iso2;PSD-93 iso2;PSD-93 iso2;PSD-93 iso2;PSD-93 iso2	420, 436;296, 312;303, 319;235, 251;331, 347;254, 270;296, 312;331, 347	Disks large homolog 2	Q91XM9-7;Q91XM9;Q91XM9-2;Q91XM9-3;Q91XM9-4;Q91XM9-6;Q91XM9-8;Q91XM9-5	http://www.phosphosite.org/proteinAction.do?id=17674200&showAllSites=true	109.2	GPPDITHsYSPPMEN;LLSGNNGtLEYKTSL			VGKPTTIYMTDPYGPPDITHS*YSPPMENHLLSGNNGT*LEYK	4	1174.53									26077												79.1037												2.1735
438	436	Adaptor/scaffold	Dlg2;Dlg2;Dlg2;Dlg2;Dlg2;Dlg2;Dlg2;Dlg2	PSD-93 iso2;PSD-93;PSD-93 iso2;PSD-93 iso2;PSD-93 iso2;PSD-93 iso2;PSD-93 iso2;PSD-93 iso2	421, 422;297, 298;304, 305;236, 237;332, 333;255, 256;297, 298;332, 333	Disks large homolog 2	Q91XM9-7;Q91XM9;Q91XM9-2;Q91XM9-3;Q91XM9-4;Q91XM9-6;Q91XM9-8;Q91XM9-5	http://www.phosphosite.org/proteinAction.do?id=17674200&showAllSites=true	109.2	PPDITHSySPPMENH;PDITHSYsPPMENHL			VGKPTTIYMTDPYGPPDITHSY*S*PPMENHLLSGNNGTLEYK	4	1174.53				25946	26309											78.9391	79.2603											2.039	1.7698
439	437	Adaptor/scaffold	Dlg2;Dlg2;Dlg2;Dlg2;Dlg2;Dlg2;Dlg2;Dlg2	PSD-93 iso2;PSD-93;PSD-93 iso2;PSD-93 iso2;PSD-93 iso2;PSD-93 iso2;PSD-93 iso2;PSD-93 iso2	421, 431;297, 307;304, 314;236, 246;332, 342;255, 265;297, 307;332, 342	Disks large homolog 2	Q91XM9-7;Q91XM9;Q91XM9-2;Q91XM9-3;Q91XM9-4;Q91XM9-6;Q91XM9-8;Q91XM9-5	http://www.phosphosite.org/proteinAction.do?id=17674200&showAllSites=true	109.2	PPDITHSySPPMENH;PMENHLLsGNNGTLE			VGKPTTIYMTDPYGPPDITHSY*SPPMENHLLS*GNNGTLEYK	4	1174.53	26118											25823	79.4434											78.8558	1.7088
440	438	Adaptor/scaffold	Dlg2;Dlg2;Dlg2;Dlg2;Dlg2;Dlg2;Dlg2;Dlg2	PSD-93 iso2;PSD-93;PSD-93 iso2;PSD-93 iso2;PSD-93 iso2;PSD-93 iso2;PSD-93 iso2;PSD-93 iso2	451, 452;327, §328;334, 335;266, 267;362, 363;285, 286;327, 328;362, 363	Disks large homolog 2	Q91XM9-7;Q91XM9;Q91XM9-2;Q91XM9-3;Q91XM9-4;Q91XM9-6;Q91XM9-8;Q91XM9-5	http://www.phosphosite.org/proteinAction.do?id=17674200&showAllSites=true	109.2	PPISPGRySPIPKHM;PISPGRYsPIPKHML			TSLPPISPGRY*S*PIPK	3	623.969												21549												67.4207
441	439	Adaptor/scaffold	Dlg2;Dlg2;Dlg2;Dlg2;Dlg2;Dlg2;Dlg2;Dlg2	PSD-93 iso2;PSD-93;PSD-93 iso2;PSD-93 iso2;PSD-93 iso2;PSD-93 iso2;PSD-93 iso2;PSD-93 iso2	451;327;334;266;362;285;327;362	Disks large homolog 2	Q91XM9-7;Q91XM9;Q91XM9-2;Q91XM9-3;Q91XM9-4;Q91XM9-6;Q91XM9-8;Q91XM9-5	http://www.phosphosite.org/proteinAction.do?id=17674200&showAllSites=true	109.2	PPISPGRySPIPKHM			Y*SPIPK	2	392.686	10760		10423		10649								37.4798		37.2618		37.2678								1.0497		1.3868		1.5613
442	440	Adaptor/scaffold	Dlg2;Dlg2;Dlg2;Dlg2;Dlg2;Dlg2;Dlg2;Dlg2	PSD-93 iso2;PSD-93;PSD-93 iso2;PSD-93 iso2;PSD-93 iso2;PSD-93 iso2;PSD-93 iso2;PSD-93 iso2	464, 465;§340, §341;347, 348;279, 280;375, 376;298, 299;340, 341;375, 376	Disks large homolog 2	Q91XM9-7;Q91XM9;Q91XM9-2;Q91XM9-3;Q91XM9-4;Q91XM9-6;Q91XM9-8;Q91XM9-5	http://www.phosphosite.org/proteinAction.do?id=17674200&showAllSites=true	109.2	HMLGEDDyTRPPEPV;MLGEDDYtRPPEPVY			HM#LGEDDY*T*RPPEPVYSTVNKLCDKPASPR	4	912.903	19856											19449	62.4904											61.7987	1.4057
443	441	Adaptor/scaffold	Dlg2;Dlg2;Dlg2;Dlg2;Dlg2;Dlg2;Dlg2;Dlg2	PSD-93 iso2;PSD-93;PSD-93 iso2;PSD-93 iso2;PSD-93 iso2;PSD-93 iso2;PSD-93 iso2;PSD-93 iso2	464, 465;§340, §341;347, 348;279, 280;375, 376;298, 299;340, 341;375, 376	Disks large homolog 2	Q91XM9-7;Q91XM9;Q91XM9-2;Q91XM9-3;Q91XM9-4;Q91XM9-6;Q91XM9-8;Q91XM9-5	http://www.phosphosite.org/proteinAction.do?id=17674200&showAllSites=true	109.2	HMLGEDDyTRPPEPV;MLGEDDYtRPPEPVY			HMLGEDDY*T*RPPEPVYSTVNKLCDKPASPR	4	908.904							20539												64.9961												1.371
444	442	Adaptor/scaffold	Dlg2;Dlg2;Dlg2;Dlg2;Dlg2;Dlg2;Dlg2;Dlg2	PSD-93 iso2;PSD-93;PSD-93 iso2;PSD-93 iso2;PSD-93 iso2;PSD-93 iso2;PSD-93 iso2;PSD-93 iso2	464, 472, 484;§340, §348, §360;347, 355, 367;279, 287, 299;375, 383, 395;298, 306, 318;340, 348, 360;375, 383, 395	Disks large homolog 2	Q91XM9-7;Q91XM9;Q91XM9-2;Q91XM9-3;Q91XM9-4;Q91XM9-6;Q91XM9-8;Q91XM9-5	http://www.phosphosite.org/proteinAction.do?id=17674200&showAllSites=true	109.2	HMLGEDDyTRPPEPV;TRPPEPVySTVNKLC;KLCDKPAsPRHYSPV	Fyn	CSK	HM#LGEDDY*TRPPEPVY*STVNKLCDKPAS*PR	4	932.895	20790	20929	20372	20483	20821	20646		20595			20667	20397	65.0169	64.2017	64.2867	64.2557	64.5534	63.9932		64.163			64.1637	64.3179	1.1222	3.9823	1.1032	2.1851	1.9471	2.8553		2.6683
445	443	Adaptor/scaffold	Dlg2;Dlg2;Dlg2;Dlg2;Dlg2;Dlg2;Dlg2;Dlg2	PSD-93 iso2;PSD-93;PSD-93 iso2;PSD-93 iso2;PSD-93 iso2;PSD-93 iso2;PSD-93 iso2;PSD-93 iso2	464, 472, 484;§340, §348, §360;347, 355, 367;279, 287, 299;375, 383, 395;298, 306, 318;340, 348, 360;375, 383, 395	Disks large homolog 2	Q91XM9-7;Q91XM9;Q91XM9-2;Q91XM9-3;Q91XM9-4;Q91XM9-6;Q91XM9-8;Q91XM9-5	http://www.phosphosite.org/proteinAction.do?id=17674200&showAllSites=true	109.2	HMLGEDDyTRPPEPV;TRPPEPVySTVNKLC;KLCDKPAsPRHYSPV	Fyn	CSK	HM#LGEDDY*TRPPEPVY*STVNKLCDKPAS*PR	4	932.895				20385							20866	20545				63.9942							64.6923	64.7082				1.5892
446	444	Adaptor/scaffold	Dlg2;Dlg2;Dlg2;Dlg2;Dlg2;Dlg2;Dlg2;Dlg2	PSD-93 iso2;PSD-93;PSD-93 iso2;PSD-93 iso2;PSD-93 iso2;PSD-93 iso2;PSD-93 iso2;PSD-93 iso2	464, 472, 484;§340, §348, §360;347, 355, 367;279, 287, 299;375, 383, 395;298, 306, 318;340, 348, 360;375, 383, 395	Disks large homolog 2	Q91XM9-7;Q91XM9;Q91XM9-2;Q91XM9-3;Q91XM9-4;Q91XM9-6;Q91XM9-8;Q91XM9-5	http://www.phosphosite.org/proteinAction.do?id=17674200&showAllSites=true	109.2	HMLGEDDyTRPPEPV;TRPPEPVySTVNKLC;KLCDKPAsPRHYSPV	Fyn	CSK	HM#LGEDDY*TRPPEPVY*STVNKLCDKPAS*PR	4	932.895												20313												64.0927
447	445	Adaptor/scaffold	Dlg2;Dlg2;Dlg2;Dlg2;Dlg2;Dlg2;Dlg2;Dlg2	PSD-93 iso2;PSD-93;PSD-93 iso2;PSD-93 iso2;PSD-93 iso2;PSD-93 iso2;PSD-93 iso2;PSD-93 iso2	464, 472, 484;§340, §348, §360;347, 355, 367;279, 287, 299;375, 383, 395;298, 306, 318;340, 348, 360;375, 383, 395	Disks large homolog 2	Q91XM9-7;Q91XM9;Q91XM9-2;Q91XM9-3;Q91XM9-4;Q91XM9-6;Q91XM9-8;Q91XM9-5	http://www.phosphosite.org/proteinAction.do?id=17674200&showAllSites=true	109.2	HMLGEDDyTRPPEPV;TRPPEPVySTVNKLC;KLCDKPAsPRHYSPV	Fyn	CSK	HMLGEDDY*TRPPEPVY*STVNKLCDKPAS*PR	4	928.896		22304	21757		22093	21967	21658	22155						67.8843	68.02		67.972	67.5156	68.0155	68.3601						4.3879	2.0228		3.4833	3.6919	3.0545	2.5069
448	446	Adaptor/scaffold	Dlg2;Dlg2;Dlg2;Dlg2;Dlg2;Dlg2;Dlg2;Dlg2	PSD-93 iso2;PSD-93;PSD-93 iso2;PSD-93 iso2;PSD-93 iso2;PSD-93 iso2;PSD-93 iso2;PSD-93 iso2	464, 472, 484;§340, §348, §360;347, 355, 367;279, 287, 299;375, 383, 395;298, 306, 318;340, 348, 360;375, 383, 395	Disks large homolog 2	Q91XM9-7;Q91XM9;Q91XM9-2;Q91XM9-3;Q91XM9-4;Q91XM9-6;Q91XM9-8;Q91XM9-5	http://www.phosphosite.org/proteinAction.do?id=17674200&showAllSites=true	109.2	HMLGEDDyTRPPEPV;TRPPEPVySTVNKLC;KLCDKPAsPRHYSPV	Fyn	CSK	HMLGEDDY*TRPPEPVY*STVNKLCDKPAS*PR	4	928.896			21666		22087	22173	21599	21937							67.7649		67.9576	68.0617	67.8551	67.7776							1.2296		3.4065	3.5854	2.7028	2.9693
449	447	Adaptor/scaffold	Dlg2;Dlg2;Dlg2;Dlg2;Dlg2;Dlg2;Dlg2;Dlg2	PSD-93 iso2;PSD-93;PSD-93 iso2;PSD-93 iso2;PSD-93 iso2;PSD-93 iso2;PSD-93 iso2;PSD-93 iso2	464, 472;§340, §348;347, 355;279, 287;375, 383;298, 306;340, 348;375, 383	Disks large homolog 2	Q91XM9-7;Q91XM9;Q91XM9-2;Q91XM9-3;Q91XM9-4;Q91XM9-6;Q91XM9-8;Q91XM9-5	http://www.phosphosite.org/proteinAction.do?id=17674200&showAllSites=true	109.2	HMLGEDDyTRPPEPV;TRPPEPVySTVNKLC	Fyn	CSK	HM#LGEDDY*TRPPEPVY*STVNK	3	875.364	16529	17664		16562	16483	16421	15982			16145	16452	16041	53.3511	55.459		53.7372	52.9199	52.7048	52.7045			52.2384	52.821	52.6657	2.4778	1.8557		1.6943	5.1634	5.206	5.2077			4.2588
450	448	Adaptor/scaffold	Dlg2;Dlg2;Dlg2;Dlg2;Dlg2;Dlg2;Dlg2;Dlg2	PSD-93 iso2;PSD-93;PSD-93 iso2;PSD-93 iso2;PSD-93 iso2;PSD-93 iso2;PSD-93 iso2;PSD-93 iso2	464, 472;§340, §348;347, 355;279, 287;375, 383;298, 306;340, 348;375, 383	Disks large homolog 2	Q91XM9-7;Q91XM9;Q91XM9-2;Q91XM9-3;Q91XM9-4;Q91XM9-6;Q91XM9-8;Q91XM9-5	http://www.phosphosite.org/proteinAction.do?id=17674200&showAllSites=true	109.2	HMLGEDDyTRPPEPV;TRPPEPVySTVNKLC	Fyn	CSK	HM#LGEDDY*TRPPEPVY*STVNK	3	875.364	16849			15926						16340		16449	54.2285			52.025						52.7677		53.7569	1.6738			2.081						5.8183
451	449	Adaptor/scaffold	Dlg2;Dlg2;Dlg2;Dlg2;Dlg2;Dlg2;Dlg2;Dlg2	PSD-93 iso2;PSD-93;PSD-93 iso2;PSD-93 iso2;PSD-93 iso2;PSD-93 iso2;PSD-93 iso2;PSD-93 iso2	464, 472;§340, §348;347, 355;279, 287;375, 383;298, 306;340, 348;375, 383	Disks large homolog 2	Q91XM9-7;Q91XM9;Q91XM9-2;Q91XM9-3;Q91XM9-4;Q91XM9-6;Q91XM9-8;Q91XM9-5	http://www.phosphosite.org/proteinAction.do?id=17674200&showAllSites=true	109.2	HMLGEDDyTRPPEPV;TRPPEPVySTVNKLC	Fyn	CSK	HM#LGEDDY*TRPPEPVY*STVNK	3	875.364	16237												52.5319												2.4127
452	450	Adaptor/scaffold	Dlg2;Dlg2;Dlg2;Dlg2;Dlg2;Dlg2;Dlg2;Dlg2	PSD-93 iso2;PSD-93;PSD-93 iso2;PSD-93 iso2;PSD-93 iso2;PSD-93 iso2;PSD-93 iso2;PSD-93 iso2	464, 472;§340, §348;347, 355;279, 287;375, 383;298, 306;340, 348;375, 383	Disks large homolog 2	Q91XM9-7;Q91XM9;Q91XM9-2;Q91XM9-3;Q91XM9-4;Q91XM9-6;Q91XM9-8;Q91XM9-5	http://www.phosphosite.org/proteinAction.do?id=17674200&showAllSites=true	109.2	HMLGEDDyTRPPEPV;TRPPEPVySTVNKLC	Fyn	CSK	HM#LGEDDY*TRPPEPVY*STVNK	3	875.364	16637												53.6543												1.92
453	451	Adaptor/scaffold	Dlg2;Dlg2;Dlg2;Dlg2;Dlg2;Dlg2;Dlg2;Dlg2	PSD-93 iso2;PSD-93;PSD-93 iso2;PSD-93 iso2;PSD-93 iso2;PSD-93 iso2;PSD-93 iso2;PSD-93 iso2	464, 472;§340, §348;347, 355;279, 287;375, 383;298, 306;340, 348;375, 383	Disks large homolog 2	Q91XM9-7;Q91XM9;Q91XM9-2;Q91XM9-3;Q91XM9-4;Q91XM9-6;Q91XM9-8;Q91XM9-5	http://www.phosphosite.org/proteinAction.do?id=17674200&showAllSites=true	109.2	HMLGEDDyTRPPEPV;TRPPEPVySTVNKLC	Fyn	CSK	HM#LGEDDY*TRPPEPVY*STVNKLCDKPASPR	4	912.903					19932												62.1755												2.6637
454	452	Adaptor/scaffold	Dlg2;Dlg2;Dlg2;Dlg2;Dlg2;Dlg2;Dlg2;Dlg2	PSD-93 iso2;PSD-93;PSD-93 iso2;PSD-93 iso2;PSD-93 iso2;PSD-93 iso2;PSD-93 iso2;PSD-93 iso2	464, 472;§340, §348;347, 355;279, 287;375, 383;298, 306;340, 348;375, 383	Disks large homolog 2	Q91XM9-7;Q91XM9;Q91XM9-2;Q91XM9-3;Q91XM9-4;Q91XM9-6;Q91XM9-8;Q91XM9-5	http://www.phosphosite.org/proteinAction.do?id=17674200&showAllSites=true	109.2	HMLGEDDyTRPPEPV;TRPPEPVySTVNKLC	Fyn	CSK	HMLGEDDY*TRPPEPVY*STVNK	3	870.032	18438	18547	18050	18137	18459	18403	17804	18291	18027	18300	18457	18148	58.6018	57.8171	58.0252	57.9599	58.2224	57.9964	57.665	57.9603	57.5512	58.0295	58.2216	58.3218	4.8295	5.2592	5.6386	5.8202	4.9474	5.7866	5.4066	5.4112	3.8703	5.1005
455	453	Adaptor/scaffold	Dlg2;Dlg2;Dlg2;Dlg2;Dlg2;Dlg2;Dlg2;Dlg2	PSD-93 iso2;PSD-93;PSD-93 iso2;PSD-93 iso2;PSD-93 iso2;PSD-93 iso2;PSD-93 iso2;PSD-93 iso2	464, 472;§340, §348;347, 355;279, 287;375, 383;298, 306;340, 348;375, 383	Disks large homolog 2	Q91XM9-7;Q91XM9;Q91XM9-2;Q91XM9-3;Q91XM9-4;Q91XM9-6;Q91XM9-8;Q91XM9-5	http://www.phosphosite.org/proteinAction.do?id=17674200&showAllSites=true	109.2	HMLGEDDyTRPPEPV;TRPPEPVySTVNKLC	Fyn	CSK	HMLGEDDY*TRPPEPVY*STVNK	3	870.032	18252				18389		17998		18229	18100	18265	17951	58.0864				58.0353		58.1874		58.0877	57.4979	57.708	57.7903	5.3578				6.0449		6.5345		5.442	5.0674
456	454	Adaptor/scaffold	Dlg2;Dlg2;Dlg2;Dlg2;Dlg2;Dlg2;Dlg2;Dlg2	PSD-93 iso2;PSD-93;PSD-93 iso2;PSD-93 iso2;PSD-93 iso2;PSD-93 iso2;PSD-93 iso2;PSD-93 iso2	464, 472;§340, §348;347, 355;279, 287;375, 383;298, 306;340, 348;375, 383	Disks large homolog 2	Q91XM9-7;Q91XM9;Q91XM9-2;Q91XM9-3;Q91XM9-4;Q91XM9-6;Q91XM9-8;Q91XM9-5	http://www.phosphosite.org/proteinAction.do?id=17674200&showAllSites=true	109.2	HMLGEDDyTRPPEPV;TRPPEPVySTVNKLC	Fyn	CSK	HMLGEDDY*TRPPEPVY*STVNK	3	870.032									18081												57.6957												5.4056
457	455	Adaptor/scaffold	Dlg2;Dlg2;Dlg2;Dlg2;Dlg2;Dlg2;Dlg2;Dlg2	PSD-93 iso2;PSD-93;PSD-93 iso2;PSD-93 iso2;PSD-93 iso2;PSD-93 iso2;PSD-93 iso2;PSD-93 iso2	464, 472;§340, §348;347, 355;279, 287;375, 383;298, 306;340, 348;375, 383	Disks large homolog 2	Q91XM9-7;Q91XM9;Q91XM9-2;Q91XM9-3;Q91XM9-4;Q91XM9-6;Q91XM9-8;Q91XM9-5	http://www.phosphosite.org/proteinAction.do?id=17674200&showAllSites=true	109.2	HMLGEDDyTRPPEPV;TRPPEPVySTVNKLC	Fyn	CSK	HMLGEDDY*TRPPEPVY*STVNKLCDKPASPR	4	908.904								20910			21203									65.0013			65.5941									2.8461
458	456	Adaptor/scaffold	Dlg2;Dlg2;Dlg2;Dlg2;Dlg2;Dlg2;Dlg2;Dlg2	PSD-93 iso2;PSD-93;PSD-93 iso2;PSD-93 iso2;PSD-93 iso2;PSD-93 iso2;PSD-93 iso2;PSD-93 iso2	464, 473, 484;§340, §349, §360;347, 356, 367;279, 288, 299;375, 384, 395;298, 307, 318;340, 349, 360;375, 384, 395	Disks large homolog 2	Q91XM9-7;Q91XM9;Q91XM9-2;Q91XM9-3;Q91XM9-4;Q91XM9-6;Q91XM9-8;Q91XM9-5	http://www.phosphosite.org/proteinAction.do?id=17674200&showAllSites=true	109.2	HMLGEDDyTRPPEPV;RPPEPVYsTVNKLCD;KLCDKPAsPRHYSPV			HM#LGEDDY*TRPPEPVYS*TVNKLCDKPAS*PR	4	932.895				20667							20725					64.7523							64.3161					1.554
459	457	Adaptor/scaffold	Dlg2;Dlg2;Dlg2;Dlg2;Dlg2;Dlg2;Dlg2;Dlg2	PSD-93 iso2;PSD-93;PSD-93 iso2;PSD-93 iso2;PSD-93 iso2;PSD-93 iso2;PSD-93 iso2;PSD-93 iso2	464, 473, 484;§340, §349, §360;347, 356, 367;279, 288, 299;375, 384, 395;298, 307, 318;340, 349, 360;375, 384, 395	Disks large homolog 2	Q91XM9-7;Q91XM9;Q91XM9-2;Q91XM9-3;Q91XM9-4;Q91XM9-6;Q91XM9-8;Q91XM9-5	http://www.phosphosite.org/proteinAction.do?id=17674200&showAllSites=true	109.2	HMLGEDDyTRPPEPV;RPPEPVYsTVNKLCD;KLCDKPAsPRHYSPV			HMLGEDDY*TRPPEPVYS*TVNKLCDKPAS*PR	4	928.896		22092	21818	21975					21925		21944	21611		67.3224	68.1837	68.2777					68.0024		67.6032	67.5906		1.9183	2.3947	2.5563					3.3701
460	458	Adaptor/scaffold	Dlg2;Dlg2;Dlg2;Dlg2;Dlg2;Dlg2;Dlg2;Dlg2	PSD-93 iso2;PSD-93;PSD-93 iso2;PSD-93 iso2;PSD-93 iso2;PSD-93 iso2;PSD-93 iso2;PSD-93 iso2	464, 473, 484;§340, §349, §360;347, 356, 367;279, 288, 299;375, 384, 395;298, 307, 318;340, 349, 360;375, 384, 395	Disks large homolog 2	Q91XM9-7;Q91XM9;Q91XM9-2;Q91XM9-3;Q91XM9-4;Q91XM9-6;Q91XM9-8;Q91XM9-5	http://www.phosphosite.org/proteinAction.do?id=17674200&showAllSites=true	109.2	HMLGEDDyTRPPEPV;RPPEPVYsTVNKLCD;KLCDKPAsPRHYSPV			HMLGEDDY*TRPPEPVYS*TVNKLCDKPAS*PR	4	928.896				21756												67.6921												2.9689
461	459	Adaptor/scaffold	Dlg2;Dlg2;Dlg2;Dlg2;Dlg2;Dlg2;Dlg2;Dlg2	PSD-93 iso2;PSD-93;PSD-93 iso2;PSD-93 iso2;PSD-93 iso2;PSD-93 iso2;PSD-93 iso2;PSD-93 iso2	464, 473;§340, §349;347, 356;279, 288;375, 384;298, 307;340, 349;375, 384	Disks large homolog 2	Q91XM9-7;Q91XM9;Q91XM9-2;Q91XM9-3;Q91XM9-4;Q91XM9-6;Q91XM9-8;Q91XM9-5	http://www.phosphosite.org/proteinAction.do?id=17674200&showAllSites=true	109.2	HMLGEDDyTRPPEPV;RPPEPVYsTVNKLCD			HM#LGEDDY*TRPPEPVYS*TVNK	3	875.364			15893		16818		16207				16898	16672			52.1634		53.8177		53.3071				54.0223	54.3546			2.4272		2.3437		1.8758
462	460	Adaptor/scaffold	Dlg2;Dlg2;Dlg2;Dlg2;Dlg2;Dlg2;Dlg2;Dlg2	PSD-93 iso2;PSD-93;PSD-93 iso2;PSD-93 iso2;PSD-93 iso2;PSD-93 iso2;PSD-93 iso2;PSD-93 iso2	464, 473;§340, §349;347, 356;279, 288;375, 384;298, 307;340, 349;375, 384	Disks large homolog 2	Q91XM9-7;Q91XM9;Q91XM9-2;Q91XM9-3;Q91XM9-4;Q91XM9-6;Q91XM9-8;Q91XM9-5	http://www.phosphosite.org/proteinAction.do?id=17674200&showAllSites=true	109.2	HMLGEDDyTRPPEPV;RPPEPVYsTVNKLCD			HM#LGEDDY*TRPPEPVYS*TVNK	3	875.364			15902				15783				17658	17629			52.187				52.1762				56.0775	56.9168			2.2289				2.0146
463	461	Adaptor/scaffold	Dlg2;Dlg2;Dlg2;Dlg2;Dlg2;Dlg2;Dlg2;Dlg2	PSD-93 iso2;PSD-93;PSD-93 iso2;PSD-93 iso2;PSD-93 iso2;PSD-93 iso2;PSD-93 iso2;PSD-93 iso2	464, 473;§340, §349;347, 356;279, 288;375, 384;298, 307;340, 349;375, 384	Disks large homolog 2	Q91XM9-7;Q91XM9;Q91XM9-2;Q91XM9-3;Q91XM9-4;Q91XM9-6;Q91XM9-8;Q91XM9-5	http://www.phosphosite.org/proteinAction.do?id=17674200&showAllSites=true	109.2	HMLGEDDyTRPPEPV;RPPEPVYsTVNKLCD			HM#LGEDDY*TRPPEPVYS*TVNK	3	875.364											16855												53.9081
464	462	Adaptor/scaffold	Dlg2;Dlg2;Dlg2;Dlg2;Dlg2;Dlg2;Dlg2;Dlg2	PSD-93 iso2;PSD-93;PSD-93 iso2;PSD-93 iso2;PSD-93 iso2;PSD-93 iso2;PSD-93 iso2;PSD-93 iso2	464, 473;§340, §349;347, 356;279, 288;375, 384;298, 307;340, 349;375, 384	Disks large homolog 2	Q91XM9-7;Q91XM9;Q91XM9-2;Q91XM9-3;Q91XM9-4;Q91XM9-6;Q91XM9-8;Q91XM9-5	http://www.phosphosite.org/proteinAction.do?id=17674200&showAllSites=true	109.2	HMLGEDDyTRPPEPV;RPPEPVYsTVNKLCD			HM#LGEDDY*TRPPEPVYS*TVNK	3	875.364											17553												55.7936
465	463	Adaptor/scaffold	Dlg2;Dlg2;Dlg2;Dlg2;Dlg2;Dlg2;Dlg2;Dlg2	PSD-93 iso2;PSD-93;PSD-93 iso2;PSD-93 iso2;PSD-93 iso2;PSD-93 iso2;PSD-93 iso2;PSD-93 iso2	464, 473;§340, §349;347, 356;279, 288;375, 384;298, 307;340, 349;375, 384	Disks large homolog 2	Q91XM9-7;Q91XM9;Q91XM9-2;Q91XM9-3;Q91XM9-4;Q91XM9-6;Q91XM9-8;Q91XM9-5	http://www.phosphosite.org/proteinAction.do?id=17674200&showAllSites=true	109.2	HMLGEDDyTRPPEPV;RPPEPVYsTVNKLCD			HMLGEDDY*TRPPEPVYS*TVNK	3	870.032			17857		18193						18132				57.505		57.5104						57.3531				1.8642		1.3669
466	464	Adaptor/scaffold	Dlg2;Dlg2;Dlg2;Dlg2;Dlg2;Dlg2;Dlg2;Dlg2	PSD-93 iso2;PSD-93;PSD-93 iso2;PSD-93 iso2;PSD-93 iso2;PSD-93 iso2;PSD-93 iso2;PSD-93 iso2	464, 473;§340, §349;347, 356;279, 288;375, 384;298, 307;340, 349;375, 384	Disks large homolog 2	Q91XM9-7;Q91XM9;Q91XM9-2;Q91XM9-3;Q91XM9-4;Q91XM9-6;Q91XM9-8;Q91XM9-5	http://www.phosphosite.org/proteinAction.do?id=17674200&showAllSites=true	109.2	HMLGEDDyTRPPEPV;RPPEPVYsTVNKLCD			HMLGEDDY*TRPPEPVYS*TVNKLCDKPASPR	4	908.904	21096	21330								20961			65.832	65.2884								65.1558			2.2189	3.7499								2.263
467	465	Adaptor/scaffold	Dlg2;Dlg2;Dlg2;Dlg2;Dlg2;Dlg2;Dlg2;Dlg2	PSD-93 iso2;PSD-93;PSD-93 iso2;PSD-93 iso2;PSD-93 iso2;PSD-93 iso2;PSD-93 iso2;PSD-93 iso2	464, 474, 484;§340, §350, §360;347, 357, 367;279, 289, 299;375, 385, 395;298, 308, 318;340, 350, 360;375, 385, 395	Disks large homolog 2	Q91XM9-7;Q91XM9;Q91XM9-2;Q91XM9-3;Q91XM9-4;Q91XM9-6;Q91XM9-8;Q91XM9-5	http://www.phosphosite.org/proteinAction.do?id=17674200&showAllSites=true	109.2	HMLGEDDyTRPPEPV;PPEPVYStVNKLCDK;KLCDKPAsPRHYSPV			HM#LGEDDY*TRPPEPVYST*VNKLCDKPAS*PR	4	932.895							20333				20935								64.4551				64.873								1.9028
468	466	Adaptor/scaffold	Dlg2;Dlg2;Dlg2;Dlg2;Dlg2;Dlg2;Dlg2;Dlg2	PSD-93 iso2;PSD-93;PSD-93 iso2;PSD-93 iso2;PSD-93 iso2;PSD-93 iso2;PSD-93 iso2;PSD-93 iso2	464, 474, 484;§340, §350, §360;347, 357, 367;279, 289, 299;375, 385, 395;298, 308, 318;340, 350, 360;375, 385, 395	Disks large homolog 2	Q91XM9-7;Q91XM9;Q91XM9-2;Q91XM9-3;Q91XM9-4;Q91XM9-6;Q91XM9-8;Q91XM9-5	http://www.phosphosite.org/proteinAction.do?id=17674200&showAllSites=true	109.2	HMLGEDDyTRPPEPV;PPEPVYStVNKLCDK;KLCDKPAsPRHYSPV			HMLGEDDY*TRPPEPVYST*VNKLCDKPAS*PR	4	928.896					22300												68.5234												3.5039
469	467	Adaptor/scaffold	Dlg2;Dlg2;Dlg2;Dlg2;Dlg2;Dlg2;Dlg2;Dlg2	PSD-93 iso2;PSD-93;PSD-93 iso2;PSD-93 iso2;PSD-93 iso2;PSD-93 iso2;PSD-93 iso2;PSD-93 iso2	464, 474;§340, §350;347, 357;279, 289;375, 385;298, 308;340, 350;375, 385	Disks large homolog 2	Q91XM9-7;Q91XM9;Q91XM9-2;Q91XM9-3;Q91XM9-4;Q91XM9-6;Q91XM9-8;Q91XM9-5	http://www.phosphosite.org/proteinAction.do?id=17674200&showAllSites=true	109.2	HMLGEDDyTRPPEPV;PPEPVYStVNKLCDK			HM#LGEDDY*TRPPEPVYST*VNK	3	875.364											17393	16507											55.3487	53.9131
470	468	Adaptor/scaffold	Dlg2;Dlg2;Dlg2;Dlg2;Dlg2;Dlg2;Dlg2;Dlg2	PSD-93 iso2;PSD-93;PSD-93 iso2;PSD-93 iso2;PSD-93 iso2;PSD-93 iso2;PSD-93 iso2;PSD-93 iso2	464, 474;§340, §350;347, 357;279, 289;375, 385;298, 308;340, 350;375, 385	Disks large homolog 2	Q91XM9-7;Q91XM9;Q91XM9-2;Q91XM9-3;Q91XM9-4;Q91XM9-6;Q91XM9-8;Q91XM9-5	http://www.phosphosite.org/proteinAction.do?id=17674200&showAllSites=true	109.2	HMLGEDDyTRPPEPV;PPEPVYStVNKLCDK			HMLGEDDY*TRPPEPVYST*VNK	3	870.032			17885												57.5827												2.3579
471	469	Adaptor/scaffold	Dlg2;Dlg2;Dlg2;Dlg2;Dlg2;Dlg2;Dlg2;Dlg2	PSD-93 iso2;PSD-93;PSD-93 iso2;PSD-93 iso2;PSD-93 iso2;PSD-93 iso2;PSD-93 iso2;PSD-93 iso2	464, 484;§340, §360;347, 367;279, 299;375, 395;298, 318;340, 360;375, 395	Disks large homolog 2	Q91XM9-7;Q91XM9;Q91XM9-2;Q91XM9-3;Q91XM9-4;Q91XM9-6;Q91XM9-8;Q91XM9-5	http://www.phosphosite.org/proteinAction.do?id=17674200&showAllSites=true	109.2	HMLGEDDyTRPPEPV;KLCDKPAsPRHYSPV			HMLGEDDY*TRPPEPVYSTVNKLCDKPAS*PR	3	1211.54											21984												67.7094
472	470	Adaptor/scaffold	Dlg2;Dlg2;Dlg2;Dlg2;Dlg2;Dlg2;Dlg2;Dlg2	PSD-93 iso2;PSD-93;PSD-93 iso2;PSD-93 iso2;PSD-93 iso2;PSD-93 iso2;PSD-93 iso2;PSD-93 iso2	464;§340;347;279;375;298;340;375	Disks large homolog 2	Q91XM9-7;Q91XM9;Q91XM9-2;Q91XM9-3;Q91XM9-4;Q91XM9-6;Q91XM9-8;Q91XM9-5	http://www.phosphosite.org/proteinAction.do?id=17674200&showAllSites=true	109.2	HMLGEDDyTRPPEPV			HM#LGEDDY*TRPPEPVYSTVNK	3	848.709	17525		15887	15877	16244		15736				16227	15797	56.1151		52.1469	51.8951	52.2824		52.0521				52.197	52.0145	1.9775		2.8958	4.0111	3.6048		3.1886
473	471	Adaptor/scaffold	Dlg2;Dlg2;Dlg2;Dlg2;Dlg2;Dlg2;Dlg2;Dlg2	PSD-93 iso2;PSD-93;PSD-93 iso2;PSD-93 iso2;PSD-93 iso2;PSD-93 iso2;PSD-93 iso2;PSD-93 iso2	464;§340;347;279;375;298;340;375	Disks large homolog 2	Q91XM9-7;Q91XM9;Q91XM9-2;Q91XM9-3;Q91XM9-4;Q91XM9-6;Q91XM9-8;Q91XM9-5	http://www.phosphosite.org/proteinAction.do?id=17674200&showAllSites=true	109.2	HMLGEDDyTRPPEPV			HM#LGEDDY*TRPPEPVYSTVNK	3	848.709											16214												52.1602
474	472	Adaptor/scaffold	Dlg2;Dlg2;Dlg2;Dlg2;Dlg2;Dlg2;Dlg2;Dlg2	PSD-93 iso2;PSD-93;PSD-93 iso2;PSD-93 iso2;PSD-93 iso2;PSD-93 iso2;PSD-93 iso2;PSD-93 iso2	464;§340;347;279;375;298;340;375	Disks large homolog 2	Q91XM9-7;Q91XM9;Q91XM9-2;Q91XM9-3;Q91XM9-4;Q91XM9-6;Q91XM9-8;Q91XM9-5	http://www.phosphosite.org/proteinAction.do?id=17674200&showAllSites=true	109.2	HMLGEDDyTRPPEPV			HMLGEDDY*TRPPEPVYSTVNK	3	843.377		18126			18083	17909	17569	17850		17854	17945			56.6925			57.2166	56.6767	57.0334	56.782		56.8368	56.8509			4.6215			5.3987	2.8424	4.3306	4.4086		5.3124
475	473	Adaptor/scaffold	Dlg2;Dlg2;Dlg2;Dlg2;Dlg2;Dlg2;Dlg2;Dlg2	PSD-93 iso2;PSD-93;PSD-93 iso2;PSD-93 iso2;PSD-93 iso2;PSD-93 iso2;PSD-93 iso2;PSD-93 iso2	464;§340;347;279;375;298;340;375	Disks large homolog 2	Q91XM9-7;Q91XM9;Q91XM9-2;Q91XM9-3;Q91XM9-4;Q91XM9-6;Q91XM9-8;Q91XM9-5	http://www.phosphosite.org/proteinAction.do?id=17674200&showAllSites=true	109.2	HMLGEDDyTRPPEPV			HMLGEDDY*TRPPEPVYSTVNK	3	843.377					18040	17930		17874									57.1025	56.7338		56.846									1.5366	5.0868		5.1372
476	474	Adaptor/scaffold	Dlg2;Dlg2;Dlg2;Dlg2;Dlg2;Dlg2;Dlg2;Dlg2	PSD-93 iso2;PSD-93;PSD-93 iso2;PSD-93 iso2;PSD-93 iso2;PSD-93 iso2;PSD-93 iso2;PSD-93 iso2	465, 472, 484;§341, §348, §360;348, 355, 367;280, 287, 299;376, 383, 395;299, 306, 318;341, 348, 360;376, 383, 395	Disks large homolog 2	Q91XM9-7;Q91XM9;Q91XM9-2;Q91XM9-3;Q91XM9-4;Q91XM9-6;Q91XM9-8;Q91XM9-5	http://www.phosphosite.org/proteinAction.do?id=17674200&showAllSites=true	109.2	MLGEDDYtRPPEPVY;TRPPEPVySTVNKLC;KLCDKPAsPRHYSPV	Fyn	CSK	HM#LGEDDYT*RPPEPVY*STVNKLCDKPAS*PR	4	932.895						20663				20730								64.0382				64.534								3.2743				2.0324
477	475	Adaptor/scaffold	Dlg2;Dlg2;Dlg2;Dlg2;Dlg2;Dlg2;Dlg2;Dlg2	PSD-93 iso2;PSD-93;PSD-93 iso2;PSD-93 iso2;PSD-93 iso2;PSD-93 iso2;PSD-93 iso2;PSD-93 iso2	465, 472, 484;§341, §348, §360;348, 355, 367;280, 287, 299;376, 383, 395;299, 306, 318;341, 348, 360;376, 383, 395	Disks large homolog 2	Q91XM9-7;Q91XM9;Q91XM9-2;Q91XM9-3;Q91XM9-4;Q91XM9-6;Q91XM9-8;Q91XM9-5	http://www.phosphosite.org/proteinAction.do?id=17674200&showAllSites=true	109.2	MLGEDDYtRPPEPVY;TRPPEPVySTVNKLC;KLCDKPAsPRHYSPV	Fyn	CSK	HMLGEDDYT*RPPEPVY*STVNKLCDKPAS*PR	4	928.896	22050									22136	22168		68.4348									68.3203	68.1996		3.4735									2.3772
478	476	Adaptor/scaffold	Dlg2;Dlg2;Dlg2;Dlg2;Dlg2;Dlg2;Dlg2;Dlg2	PSD-93 iso2;PSD-93;PSD-93 iso2;PSD-93 iso2;PSD-93 iso2;PSD-93 iso2;PSD-93 iso2;PSD-93 iso2	465, 472;§341, §348;348, 355;280, 287;376, 383;299, 306;341, 348;376, 383	Disks large homolog 2	Q91XM9-7;Q91XM9;Q91XM9-2;Q91XM9-3;Q91XM9-4;Q91XM9-6;Q91XM9-8;Q91XM9-5	http://www.phosphosite.org/proteinAction.do?id=17674200&showAllSites=true	109.2	MLGEDDYtRPPEPVY;TRPPEPVySTVNKLC	Fyn	CSK	HM#LGEDDYT*RPPEPVY*STVNK	3	875.364	16432	17248	16186	15974	16285	17291		16322	16254		17066	17879	53.0757	54.3505	52.9578	52.1532	52.3926	55.0186		52.6943	52.7835		54.4798	57.5969	5.3437	2.5609	2.5519	3.9638	4.2964	1.8064		5.0038	5.4399
479	477	Adaptor/scaffold	Dlg2;Dlg2;Dlg2;Dlg2;Dlg2;Dlg2;Dlg2;Dlg2	PSD-93 iso2;PSD-93;PSD-93 iso2;PSD-93 iso2;PSD-93 iso2;PSD-93 iso2;PSD-93 iso2;PSD-93 iso2	465, 472;§341, §348;348, 355;280, 287;376, 383;299, 306;341, 348;376, 383	Disks large homolog 2	Q91XM9-7;Q91XM9;Q91XM9-2;Q91XM9-3;Q91XM9-4;Q91XM9-6;Q91XM9-8;Q91XM9-5	http://www.phosphosite.org/proteinAction.do?id=17674200&showAllSites=true	109.2	MLGEDDYtRPPEPVY;TRPPEPVySTVNKLC	Fyn	CSK	HM#LGEDDYT*RPPEPVY*STVNK	3	875.364		16912	16105	16172		16222		16128	16043		16267	16242		53.4516	52.7299	52.6876		52.1753		52.1731	52.2198		52.3047	53.2063		3.3509	4.2645	5.1838		5.6629		3.0112	4.2497
480	478	Adaptor/scaffold	Dlg2;Dlg2;Dlg2;Dlg2;Dlg2;Dlg2;Dlg2;Dlg2	PSD-93 iso2;PSD-93;PSD-93 iso2;PSD-93 iso2;PSD-93 iso2;PSD-93 iso2;PSD-93 iso2;PSD-93 iso2	465, 472;§341, §348;348, 355;280, 287;376, 383;299, 306;341, 348;376, 383	Disks large homolog 2	Q91XM9-7;Q91XM9;Q91XM9-2;Q91XM9-3;Q91XM9-4;Q91XM9-6;Q91XM9-8;Q91XM9-5	http://www.phosphosite.org/proteinAction.do?id=17674200&showAllSites=true	109.2	MLGEDDYtRPPEPVY;TRPPEPVySTVNKLC	Fyn	CSK	HM#LGEDDYT*RPPEPVY*STVNK	3	875.364		16424									16288	15838		52.1466									52.3618	52.1219		3.6064
481	479	Adaptor/scaffold	Dlg2;Dlg2;Dlg2;Dlg2;Dlg2;Dlg2;Dlg2;Dlg2	PSD-93 iso2;PSD-93;PSD-93 iso2;PSD-93 iso2;PSD-93 iso2;PSD-93 iso2;PSD-93 iso2;PSD-93 iso2	465, 472;§341, §348;348, 355;280, 287;376, 383;299, 306;341, 348;376, 383	Disks large homolog 2	Q91XM9-7;Q91XM9;Q91XM9-2;Q91XM9-3;Q91XM9-4;Q91XM9-6;Q91XM9-8;Q91XM9-5	http://www.phosphosite.org/proteinAction.do?id=17674200&showAllSites=true	109.2	MLGEDDYtRPPEPVY;TRPPEPVySTVNKLC	Fyn	CSK	HM#LGEDDYT*RPPEPVY*STVNK	3	875.364		16618										17313		52.6644										56.0713		4.8736
482	480	Adaptor/scaffold	Dlg2;Dlg2;Dlg2;Dlg2;Dlg2;Dlg2;Dlg2;Dlg2	PSD-93 iso2;PSD-93;PSD-93 iso2;PSD-93 iso2;PSD-93 iso2;PSD-93 iso2;PSD-93 iso2;PSD-93 iso2	465, 472;§341, §348;348, 355;280, 287;376, 383;299, 306;341, 348;376, 383	Disks large homolog 2	Q91XM9-7;Q91XM9;Q91XM9-2;Q91XM9-3;Q91XM9-4;Q91XM9-6;Q91XM9-8;Q91XM9-5	http://www.phosphosite.org/proteinAction.do?id=17674200&showAllSites=true	109.2	MLGEDDYtRPPEPVY;TRPPEPVySTVNKLC	Fyn	CSK	HM#LGEDDYT*RPPEPVY*STVNK	3	875.364		16817										15869		53.1963										52.2025		2.8599
483	481	Adaptor/scaffold	Dlg2;Dlg2;Dlg2;Dlg2;Dlg2;Dlg2;Dlg2;Dlg2	PSD-93 iso2;PSD-93;PSD-93 iso2;PSD-93 iso2;PSD-93 iso2;PSD-93 iso2;PSD-93 iso2;PSD-93 iso2	465, 472;§341, §348;348, 355;280, 287;376, 383;299, 306;341, 348;376, 383	Disks large homolog 2	Q91XM9-7;Q91XM9;Q91XM9-2;Q91XM9-3;Q91XM9-4;Q91XM9-6;Q91XM9-8;Q91XM9-5	http://www.phosphosite.org/proteinAction.do?id=17674200&showAllSites=true	109.2	MLGEDDYtRPPEPVY;TRPPEPVySTVNKLC	Fyn	CSK	HM#LGEDDYT*RPPEPVY*STVNK	3	875.364		17463												54.9188												2.1463
484	482	Adaptor/scaffold	Dlg2;Dlg2;Dlg2;Dlg2;Dlg2;Dlg2;Dlg2;Dlg2	PSD-93 iso2;PSD-93;PSD-93 iso2;PSD-93 iso2;PSD-93 iso2;PSD-93 iso2;PSD-93 iso2;PSD-93 iso2	465, 472;§341, §348;348, 355;280, 287;376, 383;299, 306;341, 348;376, 383	Disks large homolog 2	Q91XM9-7;Q91XM9;Q91XM9-2;Q91XM9-3;Q91XM9-4;Q91XM9-6;Q91XM9-8;Q91XM9-5	http://www.phosphosite.org/proteinAction.do?id=17674200&showAllSites=true	109.2	MLGEDDYtRPPEPVY;TRPPEPVySTVNKLC	Fyn	CSK	HM#LGEDDYT*RPPEPVY*STVNK	3	875.364		17041												53.7965												2.3646
485	483	Adaptor/scaffold	Dlg2;Dlg2;Dlg2;Dlg2;Dlg2;Dlg2;Dlg2;Dlg2	PSD-93 iso2;PSD-93;PSD-93 iso2;PSD-93 iso2;PSD-93 iso2;PSD-93 iso2;PSD-93 iso2;PSD-93 iso2	465, 472;§341, §348;348, 355;280, 287;376, 383;299, 306;341, 348;376, 383	Disks large homolog 2	Q91XM9-7;Q91XM9;Q91XM9-2;Q91XM9-3;Q91XM9-4;Q91XM9-6;Q91XM9-8;Q91XM9-5	http://www.phosphosite.org/proteinAction.do?id=17674200&showAllSites=true	109.2	MLGEDDYtRPPEPVY;TRPPEPVySTVNKLC	Fyn	CSK	HMLGEDDYT*RPPEPVY*STVNK	3	870.032				17942	18264	18159		18092	18031							57.44	57.7058	57.3495		57.4296	57.563							4.8554	4.696	3.1836		2.3233	4.526
486	484	Adaptor/scaffold	Dlg2;Dlg2;Dlg2;Dlg2;Dlg2;Dlg2;Dlg2;Dlg2	PSD-93 iso2;PSD-93;PSD-93 iso2;PSD-93 iso2;PSD-93 iso2;PSD-93 iso2;PSD-93 iso2;PSD-93 iso2	465, 472;§341, §348;348, 355;280, 287;376, 383;299, 306;341, 348;376, 383	Disks large homolog 2	Q91XM9-7;Q91XM9;Q91XM9-2;Q91XM9-3;Q91XM9-4;Q91XM9-6;Q91XM9-8;Q91XM9-5	http://www.phosphosite.org/proteinAction.do?id=17674200&showAllSites=true	109.2	MLGEDDYtRPPEPVY;TRPPEPVySTVNKLC	Fyn	CSK	HMLGEDDYT*RPPEPVY*STVNK	3	870.032						18204												57.4682												5.4005
487	485	Adaptor/scaffold	Dlg2;Dlg2;Dlg2;Dlg2;Dlg2;Dlg2;Dlg2;Dlg2	PSD-93 iso2;PSD-93;PSD-93 iso2;PSD-93 iso2;PSD-93 iso2;PSD-93 iso2;PSD-93 iso2;PSD-93 iso2	465, 472;§341, §348;348, 355;280, 287;376, 383;299, 306;341, 348;376, 383	Disks large homolog 2	Q91XM9-7;Q91XM9;Q91XM9-2;Q91XM9-3;Q91XM9-4;Q91XM9-6;Q91XM9-8;Q91XM9-5	http://www.phosphosite.org/proteinAction.do?id=17674200&showAllSites=true	109.2	MLGEDDYtRPPEPVY;TRPPEPVySTVNKLC	Fyn	CSK	HMLGEDDYT*RPPEPVY*STVNKLCDKPASPR	4	908.904	20887				21271	20972	20718				20892		65.2766				65.7736	64.8562	65.4834				64.7588		1.205				2.4224	3.4491	1.6462
488	486	Adaptor/scaffold	Dlg2;Dlg2;Dlg2;Dlg2;Dlg2;Dlg2;Dlg2;Dlg2	PSD-93 iso2;PSD-93;PSD-93 iso2;PSD-93 iso2;PSD-93 iso2;PSD-93 iso2;PSD-93 iso2;PSD-93 iso2	465, 472;§341, §348;348, 355;280, 287;376, 383;299, 306;341, 348;376, 383	Disks large homolog 2	Q91XM9-7;Q91XM9;Q91XM9-2;Q91XM9-3;Q91XM9-4;Q91XM9-6;Q91XM9-8;Q91XM9-5	http://www.phosphosite.org/proteinAction.do?id=17674200&showAllSites=true	109.2	MLGEDDYtRPPEPVY;TRPPEPVySTVNKLC	Fyn	CSK	HMLGEDDYT*RPPEPVY*STVNKLCDKPASPR	4	908.904											20963												64.947
489	487	Adaptor/scaffold	Dlg2;Dlg2;Dlg2;Dlg2;Dlg2;Dlg2;Dlg2;Dlg2	PSD-93 iso2;PSD-93;PSD-93 iso2;PSD-93 iso2;PSD-93 iso2;PSD-93 iso2;PSD-93 iso2;PSD-93 iso2	465, 473, 484;§341, §349, §360;348, 356, 367;280, 288, 299;376, 384, 395;299, 307, 318;341, 349, 360;376, 384, 395	Disks large homolog 2	Q91XM9-7;Q91XM9;Q91XM9-2;Q91XM9-3;Q91XM9-4;Q91XM9-6;Q91XM9-8;Q91XM9-5	http://www.phosphosite.org/proteinAction.do?id=17674200&showAllSites=true	109.2	MLGEDDYtRPPEPVY;RPPEPVYsTVNKLCD;KLCDKPAsPRHYSPV			HMLGEDDYT*RPPEPVYS*TVNKLCDKPAS*PR	4	928.896	21906	22523				21926	21646		21998	21912	22245		68.033	68.4702				67.4054	67.9825		68.1962	67.7205	68.4061		1.4896	2.3203				2.8454	3.3975		2.7581	1.9052
490	488	Adaptor/scaffold	Dlg2;Dlg2;Dlg2;Dlg2;Dlg2;Dlg2;Dlg2;Dlg2	PSD-93 iso2;PSD-93;PSD-93 iso2;PSD-93 iso2;PSD-93 iso2;PSD-93 iso2;PSD-93 iso2;PSD-93 iso2	465, 473;§341, §349;348, 356;280, 288;376, 384;299, 307;341, 349;376, 384	Disks large homolog 2	Q91XM9-7;Q91XM9;Q91XM9-2;Q91XM9-3;Q91XM9-4;Q91XM9-6;Q91XM9-8;Q91XM9-5	http://www.phosphosite.org/proteinAction.do?id=17674200&showAllSites=true	109.2	MLGEDDYtRPPEPVY;RPPEPVYsTVNKLCD			HM#LGEDDYT*RPPEPVYS*TVNK	3	875.364		17765						17084			17254			55.7272						54.7318			54.9778			1.5563						1.4261
491	489	Adaptor/scaffold	Dlg2;Dlg2;Dlg2;Dlg2;Dlg2;Dlg2;Dlg2;Dlg2	PSD-93 iso2;PSD-93;PSD-93 iso2;PSD-93 iso2;PSD-93 iso2;PSD-93 iso2;PSD-93 iso2;PSD-93 iso2	465, 473;§341, §349;348, 356;280, 288;376, 384;299, 307;341, 349;376, 384	Disks large homolog 2	Q91XM9-7;Q91XM9;Q91XM9-2;Q91XM9-3;Q91XM9-4;Q91XM9-6;Q91XM9-8;Q91XM9-5	http://www.phosphosite.org/proteinAction.do?id=17674200&showAllSites=true	109.2	MLGEDDYtRPPEPVY;RPPEPVYsTVNKLCD			HM#LGEDDYT*RPPEPVYS*TVNK	3	875.364											16659												53.3783
492	490	Adaptor/scaffold	Dlg2;Dlg2;Dlg2;Dlg2;Dlg2;Dlg2;Dlg2;Dlg2	PSD-93 iso2;PSD-93;PSD-93 iso2;PSD-93 iso2;PSD-93 iso2;PSD-93 iso2;PSD-93 iso2;PSD-93 iso2	465, 473;§341, §349;348, 356;280, 288;376, 384;299, 307;341, 349;376, 384	Disks large homolog 2	Q91XM9-7;Q91XM9;Q91XM9-2;Q91XM9-3;Q91XM9-4;Q91XM9-6;Q91XM9-8;Q91XM9-5	http://www.phosphosite.org/proteinAction.do?id=17674200&showAllSites=true	109.2	MLGEDDYtRPPEPVY;RPPEPVYsTVNKLCD			HMLGEDDYT*RPPEPVYS*TVNK	3	870.032											18071												57.1878
493	491	Adaptor/scaffold	Dlg2;Dlg2;Dlg2;Dlg2;Dlg2;Dlg2;Dlg2;Dlg2	PSD-93 iso2;PSD-93;PSD-93 iso2;PSD-93 iso2;PSD-93 iso2;PSD-93 iso2;PSD-93 iso2;PSD-93 iso2	465, 473;§341, §349;348, 356;280, 288;376, 384;299, 307;341, 349;376, 384	Disks large homolog 2	Q91XM9-7;Q91XM9;Q91XM9-2;Q91XM9-3;Q91XM9-4;Q91XM9-6;Q91XM9-8;Q91XM9-5	http://www.phosphosite.org/proteinAction.do?id=17674200&showAllSites=true	109.2	MLGEDDYtRPPEPVY;RPPEPVYsTVNKLCD			HMLGEDDYT*RPPEPVYS*TVNKLCDKPASPR	4	908.904	21074	21126			21201						21159	20764	65.7753	64.7411			65.5828						65.4714	65.2919	3.0132	3.4457			3.723
494	492	Adaptor/scaffold	Dlg2;Dlg2;Dlg2;Dlg2;Dlg2;Dlg2;Dlg2;Dlg2	PSD-93 iso2;PSD-93;PSD-93 iso2;PSD-93 iso2;PSD-93 iso2;PSD-93 iso2;PSD-93 iso2;PSD-93 iso2	465, 473;§341, §349;348, 356;280, 288;376, 384;299, 307;341, 349;376, 384	Disks large homolog 2	Q91XM9-7;Q91XM9;Q91XM9-2;Q91XM9-3;Q91XM9-4;Q91XM9-6;Q91XM9-8;Q91XM9-5	http://www.phosphosite.org/proteinAction.do?id=17674200&showAllSites=true	109.2	MLGEDDYtRPPEPVY;RPPEPVYsTVNKLCD			HMLGEDDYT*RPPEPVYS*TVNKLCDKPASPR	4	908.904												20669												65.0405
495	493	Adaptor/scaffold	Dlg2;Dlg2;Dlg2;Dlg2;Dlg2;Dlg2;Dlg2;Dlg2	PSD-93 iso2;PSD-93;PSD-93 iso2;PSD-93 iso2;PSD-93 iso2;PSD-93 iso2;PSD-93 iso2;PSD-93 iso2	465, 474, 484;§341, §350, §360;348, 357, 367;280, 289, 299;376, 385, 395;299, 308, 318;341, 350, 360;376, 385, 395	Disks large homolog 2	Q91XM9-7;Q91XM9;Q91XM9-2;Q91XM9-3;Q91XM9-4;Q91XM9-6;Q91XM9-8;Q91XM9-5	http://www.phosphosite.org/proteinAction.do?id=17674200&showAllSites=true	109.2	MLGEDDYtRPPEPVY;PPEPVYStVNKLCDK;KLCDKPAsPRHYSPV			HMLGEDDYT*RPPEPVYST*VNKLCDKPAS*PR	4	928.896	22277		21973					22067				21783	69.0478		68.6016					68.1246				68.0469	1.0217		1.3487					4.43
496	494	Adaptor/scaffold	Dlg2;Dlg2;Dlg2;Dlg2;Dlg2;Dlg2;Dlg2;Dlg2	PSD-93 iso2;PSD-93;PSD-93 iso2;PSD-93 iso2;PSD-93 iso2;PSD-93 iso2;PSD-93 iso2;PSD-93 iso2	465, 474, 484;§341, §350, §360;348, 357, 367;280, 289, 299;376, 385, 395;299, 308, 318;341, 350, 360;376, 385, 395	Disks large homolog 2	Q91XM9-7;Q91XM9;Q91XM9-2;Q91XM9-3;Q91XM9-4;Q91XM9-6;Q91XM9-8;Q91XM9-5	http://www.phosphosite.org/proteinAction.do?id=17674200&showAllSites=true	109.2	MLGEDDYtRPPEPVY;PPEPVYStVNKLCDK;KLCDKPAsPRHYSPV			HMLGEDDYT*RPPEPVYST*VNKLCDKPAS*PR	4	928.896	22250		21955									21958	68.976		68.5544									68.5177	1.094		1.1481
497	495	Adaptor/scaffold	Dlg2;Dlg2;Dlg2;Dlg2;Dlg2;Dlg2;Dlg2;Dlg2	PSD-93 iso2;PSD-93;PSD-93 iso2;PSD-93 iso2;PSD-93 iso2;PSD-93 iso2;PSD-93 iso2;PSD-93 iso2	465, 474;§341, §350;348, 357;280, 289;376, 385;299, 308;341, 350;376, 385	Disks large homolog 2	Q91XM9-7;Q91XM9;Q91XM9-2;Q91XM9-3;Q91XM9-4;Q91XM9-6;Q91XM9-8;Q91XM9-5	http://www.phosphosite.org/proteinAction.do?id=17674200&showAllSites=true	109.2	MLGEDDYtRPPEPVY;PPEPVYStVNKLCDK			HMLGEDDYT*RPPEPVYST*VNK	3	870.032		18346										17754		57.2859										57.2608		3.0769
498	496	Adaptor/scaffold	Dlg2;Dlg2;Dlg2;Dlg2;Dlg2;Dlg2;Dlg2;Dlg2	PSD-93 iso2;PSD-93;PSD-93 iso2;PSD-93 iso2;PSD-93 iso2;PSD-93 iso2;PSD-93 iso2;PSD-93 iso2	465, 474;§341, §350;348, 357;280, 289;376, 385;299, 308;341, 350;376, 385	Disks large homolog 2	Q91XM9-7;Q91XM9;Q91XM9-2;Q91XM9-3;Q91XM9-4;Q91XM9-6;Q91XM9-8;Q91XM9-5	http://www.phosphosite.org/proteinAction.do?id=17674200&showAllSites=true	109.2	MLGEDDYtRPPEPVY;PPEPVYStVNKLCDK			HMLGEDDYT*RPPEPVYST*VNKLCDKPASPR	4	908.904			20743				20751								65.2757				65.5714								1.735				1.3772
499	497	Adaptor/scaffold	Dlg2;Dlg2;Dlg2;Dlg2;Dlg2;Dlg2;Dlg2;Dlg2	PSD-93 iso2;PSD-93;PSD-93 iso2;PSD-93 iso2;PSD-93 iso2;PSD-93 iso2;PSD-93 iso2;PSD-93 iso2	465;§341;348;280;376;299;341;376	Disks large homolog 2	Q91XM9-7;Q91XM9;Q91XM9-2;Q91XM9-3;Q91XM9-4;Q91XM9-6;Q91XM9-8;Q91XM9-5	http://www.phosphosite.org/proteinAction.do?id=17674200&showAllSites=true	109.2	MLGEDDYtRPPEPVY			HM#LGEDDYT*RPPEPVYSTVNK	3	848.709		16352				16152		16043	15973	16037	16219	15872		51.9534				51.9902		51.9483	52.0256	51.952	52.1751	52.2118		3.6566				5.3559		3.3498	3.6999	4.3335
500	498	Adaptor/scaffold	Dlg2;Dlg2;Dlg2;Dlg2;Dlg2;Dlg2;Dlg2;Dlg2	PSD-93 iso2;PSD-93;PSD-93 iso2;PSD-93 iso2;PSD-93 iso2;PSD-93 iso2;PSD-93 iso2;PSD-93 iso2	465;§341;348;280;376;299;341;376	Disks large homolog 2	Q91XM9-7;Q91XM9;Q91XM9-2;Q91XM9-3;Q91XM9-4;Q91XM9-6;Q91XM9-8;Q91XM9-5	http://www.phosphosite.org/proteinAction.do?id=17674200&showAllSites=true	109.2	MLGEDDYtRPPEPVY			HM#LGEDDYT*RPPEPVYSTVNKLCDKPASPR	4	892.911	20000										19794	19370	62.8773										61.8294	61.5892	1.2357
501	499	Adaptor/scaffold	Dlg2;Dlg2;Dlg2;Dlg2;Dlg2;Dlg2;Dlg2;Dlg2	PSD-93 iso2;PSD-93;PSD-93 iso2;PSD-93 iso2;PSD-93 iso2;PSD-93 iso2;PSD-93 iso2;PSD-93 iso2	465;§341;348;280;376;299;341;376	Disks large homolog 2	Q91XM9-7;Q91XM9;Q91XM9-2;Q91XM9-3;Q91XM9-4;Q91XM9-6;Q91XM9-8;Q91XM9-5	http://www.phosphosite.org/proteinAction.do?id=17674200&showAllSites=true	109.2	MLGEDDYtRPPEPVY			HMLGEDDYT*RPPEPVYSTVNK	3	843.377	18009		17703	17662					17823			17567	57.435		57.0948	56.6878					57			56.7513	3.0876		2.3927	4.0079					4.0633
502	500	Adaptor/scaffold	Dlg2;Dlg2;Dlg2;Dlg2;Dlg2;Dlg2;Dlg2;Dlg2	PSD-93 iso2;PSD-93;PSD-93 iso2;PSD-93 iso2;PSD-93 iso2;PSD-93 iso2;PSD-93 iso2;PSD-93 iso2	465;§341;348;280;376;299;341;376	Disks large homolog 2	Q91XM9-7;Q91XM9;Q91XM9-2;Q91XM9-3;Q91XM9-4;Q91XM9-6;Q91XM9-8;Q91XM9-5	http://www.phosphosite.org/proteinAction.do?id=17674200&showAllSites=true	109.2	MLGEDDYtRPPEPVY			HMLGEDDYT*RPPEPVYSTVNK	3	843.377	17992												57.3876												1.7013
503	501	Adaptor/scaffold	Dlg2;Dlg2;Dlg2;Dlg2;Dlg2;Dlg2;Dlg2;Dlg2	PSD-93 iso2;PSD-93;PSD-93 iso2;PSD-93 iso2;PSD-93 iso2;PSD-93 iso2;PSD-93 iso2;PSD-93 iso2	465;§341;348;280;376;299;341;376	Disks large homolog 2	Q91XM9-7;Q91XM9;Q91XM9-2;Q91XM9-3;Q91XM9-4;Q91XM9-6;Q91XM9-8;Q91XM9-5	http://www.phosphosite.org/proteinAction.do?id=17674200&showAllSites=true	109.2	MLGEDDYtRPPEPVY			HMLGEDDYT*RPPEPVYSTVNK	4	632.785	18092										18028		57.6558										57.0721		1.2341
504	502	Adaptor/scaffold	Dlg2;Dlg2;Dlg2;Dlg2;Dlg2;Dlg2;Dlg2;Dlg2	PSD-93 iso2;PSD-93;PSD-93 iso2;PSD-93 iso2;PSD-93 iso2;PSD-93 iso2;PSD-93 iso2;PSD-93 iso2	465;§341;348;280;376;299;341;376	Disks large homolog 2	Q91XM9-7;Q91XM9;Q91XM9-2;Q91XM9-3;Q91XM9-4;Q91XM9-6;Q91XM9-8;Q91XM9-5	http://www.phosphosite.org/proteinAction.do?id=17674200&showAllSites=true	109.2	MLGEDDYtRPPEPVY			HMLGEDDYT*RPPEPVYSTVNKLCDKPASPR	4	888.913											20755												64.3942
505	503	Adaptor/scaffold	Dlg2;Dlg2;Dlg2;Dlg2;Dlg2;Dlg2;Dlg2;Dlg2	PSD-93 iso2;PSD-93;PSD-93 iso2;PSD-93 iso2;PSD-93 iso2;PSD-93 iso2;PSD-93 iso2;PSD-93 iso2	472, 473, 484;§348, §349, §360;355, 356, 367;287, 288, 299;383, 384, 395;306, 307, 318;348, 349, 360;383, 384, 395	Disks large homolog 2	Q91XM9-7;Q91XM9;Q91XM9-2;Q91XM9-3;Q91XM9-4;Q91XM9-6;Q91XM9-8;Q91XM9-5	http://www.phosphosite.org/proteinAction.do?id=17674200&showAllSites=true	109.2	TRPPEPVySTVNKLC;RPPEPVYsTVNKLCD;KLCDKPAsPRHYSPV	Fyn	CSK	HM#LGEDDYTRPPEPVY*S*TVNKLCDKPAS*PR	4	932.895		21163								20709				64.8386								64.4795				1.2309								2.5307
506	504	Adaptor/scaffold	Dlg2;Dlg2;Dlg2;Dlg2;Dlg2;Dlg2;Dlg2;Dlg2	PSD-93 iso2;PSD-93;PSD-93 iso2;PSD-93 iso2;PSD-93 iso2;PSD-93 iso2;PSD-93 iso2;PSD-93 iso2	472, 473;§348, §349;355, 356;287, 288;383, 384;306, 307;348, 349;383, 384	Disks large homolog 2	Q91XM9-7;Q91XM9;Q91XM9-2;Q91XM9-3;Q91XM9-4;Q91XM9-6;Q91XM9-8;Q91XM9-5	http://www.phosphosite.org/proteinAction.do?id=17674200&showAllSites=true	109.2	TRPPEPVySTVNKLC;RPPEPVYsTVNKLCD	Fyn	CSK	HM#LGEDDYTRPPEPVY*S*TVNKLCDKPASPR	5	730.524			20507												64.6471												1.4312
507	505	Adaptor/scaffold	Dlg2;Dlg2;Dlg2;Dlg2;Dlg2;Dlg2;Dlg2;Dlg2	PSD-93 iso2;PSD-93;PSD-93 iso2;PSD-93 iso2;PSD-93 iso2;PSD-93 iso2;PSD-93 iso2;PSD-93 iso2	472, 473;§348, §349;355, 356;287, 288;383, 384;306, 307;348, 349;383, 384	Disks large homolog 2	Q91XM9-7;Q91XM9;Q91XM9-2;Q91XM9-3;Q91XM9-4;Q91XM9-6;Q91XM9-8;Q91XM9-5	http://www.phosphosite.org/proteinAction.do?id=17674200&showAllSites=true	109.2	TRPPEPVySTVNKLC;RPPEPVYsTVNKLCD	Fyn	CSK	HMLGEDDYTRPPEPVY*S*TVNKLCDKPASPR	5	727.325					22170												68.1759												2.1309
508	506	Adaptor/scaffold	Dlg2;Dlg2;Dlg2;Dlg2;Dlg2;Dlg2;Dlg2;Dlg2	PSD-93 iso2;PSD-93;PSD-93 iso2;PSD-93 iso2;PSD-93 iso2;PSD-93 iso2;PSD-93 iso2;PSD-93 iso2	472, 474, 484;§348, §350, §360;355, 357, 367;287, 289, 299;383, 385, 395;306, 308, 318;348, 350, 360;383, 385, 395	Disks large homolog 2	Q91XM9-7;Q91XM9;Q91XM9-2;Q91XM9-3;Q91XM9-4;Q91XM9-6;Q91XM9-8;Q91XM9-5	http://www.phosphosite.org/proteinAction.do?id=17674200&showAllSites=true	109.2	TRPPEPVySTVNKLC;PPEPVYStVNKLCDK;KLCDKPAsPRHYSPV	Fyn	CSK	HM#LGEDDYTRPPEPVY*ST*VNKLCDKPAS*PR	4	932.895	20819												65.095												1.2314
509	507	Adaptor/scaffold	Dlg2;Dlg2;Dlg2;Dlg2;Dlg2;Dlg2;Dlg2;Dlg2	PSD-93 iso2;PSD-93;PSD-93 iso2;PSD-93 iso2;PSD-93 iso2;PSD-93 iso2;PSD-93 iso2;PSD-93 iso2	472, 474, 484;§348, §350, §360;355, 357, 367;287, 289, 299;383, 385, 395;306, 308, 318;348, 350, 360;383, 385, 395	Disks large homolog 2	Q91XM9-7;Q91XM9;Q91XM9-2;Q91XM9-3;Q91XM9-4;Q91XM9-6;Q91XM9-8;Q91XM9-5	http://www.phosphosite.org/proteinAction.do?id=17674200&showAllSites=true	109.2	TRPPEPVySTVNKLC;PPEPVYStVNKLCDK;KLCDKPAsPRHYSPV	Fyn	CSK	HMLGEDDYTRPPEPVY*ST*VNKLCDKPAS*PR	4	928.896	22321												69.1709												1.0738
510	508	Adaptor/scaffold	Dlg2;Dlg2;Dlg2;Dlg2;Dlg2;Dlg2;Dlg2;Dlg2	PSD-93 iso2;PSD-93;PSD-93 iso2;PSD-93 iso2;PSD-93 iso2;PSD-93 iso2;PSD-93 iso2;PSD-93 iso2	472, 474;§348, §350;355, 357;287, 289;383, 385;306, 308;348, 350;383, 385	Disks large homolog 2	Q91XM9-7;Q91XM9;Q91XM9-2;Q91XM9-3;Q91XM9-4;Q91XM9-6;Q91XM9-8;Q91XM9-5	http://www.phosphosite.org/proteinAction.do?id=17674200&showAllSites=true	109.2	TRPPEPVySTVNKLC;PPEPVYStVNKLCDK	Fyn	CSK	HMLGEDDYTRPPEPVY*ST*VNKLCDKPASPR	4	908.904											18062												57.1619
511	509	Adaptor/scaffold	Dlg2;Dlg2;Dlg2;Dlg2;Dlg2;Dlg2;Dlg2;Dlg2	PSD-93 iso2;PSD-93;PSD-93 iso2;PSD-93 iso2;PSD-93 iso2;PSD-93 iso2;PSD-93 iso2;PSD-93 iso2	472, 484;§348, §360;355, 367;287, 299;383, 395;306, 318;348, 360;383, 395	Disks large homolog 2	Q91XM9-7;Q91XM9;Q91XM9-2;Q91XM9-3;Q91XM9-4;Q91XM9-6;Q91XM9-8;Q91XM9-5	http://www.phosphosite.org/proteinAction.do?id=17674200&showAllSites=true	109.2	TRPPEPVySTVNKLC;KLCDKPAsPRHYSPV	Fyn	CSK	HM#LGEDDYTRPPEPVY*STVNKLCDKPAS*PR	4	912.903	21175	21752	20246	20745	20621	20932	20126	20965	20803	20664	21633	21099	66.0492	66.4125	63.9493	64.9606	64.0171	64.7482	63.9032	65.1521	64.9631	64.3607	66.7635	66.1995	1.2198	1.9975	2.1044	3.6949	2.4596	4.1982	2.7092	2.5867	2.7737	5.9679
512	510	Adaptor/scaffold	Dlg2;Dlg2;Dlg2;Dlg2;Dlg2;Dlg2;Dlg2;Dlg2	PSD-93 iso2;PSD-93;PSD-93 iso2;PSD-93 iso2;PSD-93 iso2;PSD-93 iso2;PSD-93 iso2;PSD-93 iso2	472, 484;§348, §360;355, 367;287, 299;383, 395;306, 318;348, 360;383, 395	Disks large homolog 2	Q91XM9-7;Q91XM9;Q91XM9-2;Q91XM9-3;Q91XM9-4;Q91XM9-6;Q91XM9-8;Q91XM9-5	http://www.phosphosite.org/proteinAction.do?id=17674200&showAllSites=true	109.2	TRPPEPVySTVNKLC;KLCDKPAsPRHYSPV	Fyn	CSK	HM#LGEDDYTRPPEPVY*STVNKLCDKPAS*PR	4	912.903		21376	20484	20653	21049	20689	20312	20388	20389	20373	20959	20905		65.4149	64.585	64.7164	65.1603	64.1067	64.3979	63.6051	63.8645	63.578	64.9351	65.673		2.812	3.9625	4.3112	3.0711	5.6675	3.1235	2.0515	2.4003	2.6419
513	511	Adaptor/scaffold	Dlg2;Dlg2;Dlg2;Dlg2;Dlg2;Dlg2;Dlg2;Dlg2	PSD-93 iso2;PSD-93;PSD-93 iso2;PSD-93 iso2;PSD-93 iso2;PSD-93 iso2;PSD-93 iso2;PSD-93 iso2	472, 484;§348, §360;355, 367;287, 299;383, 395;306, 318;348, 360;383, 395	Disks large homolog 2	Q91XM9-7;Q91XM9;Q91XM9-2;Q91XM9-3;Q91XM9-4;Q91XM9-6;Q91XM9-8;Q91XM9-5	http://www.phosphosite.org/proteinAction.do?id=17674200&showAllSites=true	109.2	TRPPEPVySTVNKLC;KLCDKPAsPRHYSPV	Fyn	CSK	HM#LGEDDYTRPPEPVY*STVNKLCDKPAS*PR	4	912.903		21285		20195	20638	21317	20570				21681	20923		65.1654		63.4817	64.0624	65.7751	65.08				66.8921	65.7204		3.1397		1.714	2.4974	2.1299	2.544
514	512	Adaptor/scaffold	Dlg2;Dlg2;Dlg2;Dlg2;Dlg2;Dlg2;Dlg2;Dlg2	PSD-93 iso2;PSD-93;PSD-93 iso2;PSD-93 iso2;PSD-93 iso2;PSD-93 iso2;PSD-93 iso2;PSD-93 iso2	472, 484;§348, §360;355, 367;287, 299;383, 395;306, 318;348, 360;383, 395	Disks large homolog 2	Q91XM9-7;Q91XM9;Q91XM9-2;Q91XM9-3;Q91XM9-4;Q91XM9-6;Q91XM9-8;Q91XM9-5	http://www.phosphosite.org/proteinAction.do?id=17674200&showAllSites=true	109.2	TRPPEPVySTVNKLC;KLCDKPAsPRHYSPV	Fyn	CSK	HM#LGEDDYTRPPEPVY*STVNKLCDKPAS*PR	4	912.903		20858			21719						20524	21130		64.0079			66.967						63.776	66.2807		6.0469			2.0332
515	513	Adaptor/scaffold	Dlg2;Dlg2;Dlg2;Dlg2;Dlg2;Dlg2;Dlg2;Dlg2	PSD-93 iso2;PSD-93;PSD-93 iso2;PSD-93 iso2;PSD-93 iso2;PSD-93 iso2;PSD-93 iso2;PSD-93 iso2	472, 484;§348, §360;355, 367;287, 299;383, 395;306, 318;348, 360;383, 395	Disks large homolog 2	Q91XM9-7;Q91XM9;Q91XM9-2;Q91XM9-3;Q91XM9-4;Q91XM9-6;Q91XM9-8;Q91XM9-5	http://www.phosphosite.org/proteinAction.do?id=17674200&showAllSites=true	109.2	TRPPEPVySTVNKLC;KLCDKPAsPRHYSPV	Fyn	CSK	HM#LGEDDYTRPPEPVY*STVNKLCDKPAS*PR	4	912.903		21089			21245						21011	20472		64.6406			65.7044						65.0771	64.5127		4.6437			2.0225
516	514	Adaptor/scaffold	Dlg2;Dlg2;Dlg2;Dlg2;Dlg2;Dlg2;Dlg2;Dlg2	PSD-93 iso2;PSD-93;PSD-93 iso2;PSD-93 iso2;PSD-93 iso2;PSD-93 iso2;PSD-93 iso2;PSD-93 iso2	472, 484;§348, §360;355, 367;287, 299;383, 395;306, 318;348, 360;383, 395	Disks large homolog 2	Q91XM9-7;Q91XM9;Q91XM9-2;Q91XM9-3;Q91XM9-4;Q91XM9-6;Q91XM9-8;Q91XM9-5	http://www.phosphosite.org/proteinAction.do?id=17674200&showAllSites=true	109.2	TRPPEPVySTVNKLC;KLCDKPAsPRHYSPV	Fyn	CSK	HM#LGEDDYTRPPEPVY*STVNKLCDKPAS*PR	4	912.903					21129												65.3871												2.5417
517	515	Adaptor/scaffold	Dlg2;Dlg2;Dlg2;Dlg2;Dlg2;Dlg2;Dlg2;Dlg2	PSD-93 iso2;PSD-93;PSD-93 iso2;PSD-93 iso2;PSD-93 iso2;PSD-93 iso2;PSD-93 iso2;PSD-93 iso2	472, 484;§348, §360;355, 367;287, 299;383, 395;306, 318;348, 360;383, 395	Disks large homolog 2	Q91XM9-7;Q91XM9;Q91XM9-2;Q91XM9-3;Q91XM9-4;Q91XM9-6;Q91XM9-8;Q91XM9-5	http://www.phosphosite.org/proteinAction.do?id=17674200&showAllSites=true	109.2	TRPPEPVySTVNKLC;KLCDKPAsPRHYSPV	Fyn	CSK	HM#LGEDDYTRPPEPVY*STVNKLCDKPAS*PR	4	912.903					21506												66.4007												1.9682
518	516	Adaptor/scaffold	Dlg2;Dlg2;Dlg2;Dlg2;Dlg2;Dlg2;Dlg2;Dlg2	PSD-93 iso2;PSD-93;PSD-93 iso2;PSD-93 iso2;PSD-93 iso2;PSD-93 iso2;PSD-93 iso2;PSD-93 iso2	472, 484;§348, §360;355, 367;287, 299;383, 395;306, 318;348, 360;383, 395	Disks large homolog 2	Q91XM9-7;Q91XM9;Q91XM9-2;Q91XM9-3;Q91XM9-4;Q91XM9-6;Q91XM9-8;Q91XM9-5	http://www.phosphosite.org/proteinAction.do?id=17674200&showAllSites=true	109.2	TRPPEPVySTVNKLC;KLCDKPAsPRHYSPV	Fyn	CSK	HMLGEDDYTRPPEPVY*STVNKLCDKPAS*PR	3	1211.54		22059				21918								67.2346				67.384								2.1409				2.8082
519	517	Adaptor/scaffold	Dlg2;Dlg2;Dlg2;Dlg2;Dlg2;Dlg2;Dlg2;Dlg2	PSD-93 iso2;PSD-93;PSD-93 iso2;PSD-93 iso2;PSD-93 iso2;PSD-93 iso2;PSD-93 iso2;PSD-93 iso2	472, 484;§348, §360;355, 367;287, 299;383, 395;306, 318;348, 360;383, 395	Disks large homolog 2	Q91XM9-7;Q91XM9;Q91XM9-2;Q91XM9-3;Q91XM9-4;Q91XM9-6;Q91XM9-8;Q91XM9-5	http://www.phosphosite.org/proteinAction.do?id=17674200&showAllSites=true	109.2	TRPPEPVySTVNKLC;KLCDKPAsPRHYSPV	Fyn	CSK	HMLGEDDYTRPPEPVY*STVNKLCDKPAS*PR	3	1211.54		22205												67.6212												2.4436
520	518	Adaptor/scaffold	Dlg2;Dlg2;Dlg2;Dlg2;Dlg2;Dlg2;Dlg2;Dlg2	PSD-93 iso2;PSD-93;PSD-93 iso2;PSD-93 iso2;PSD-93 iso2;PSD-93 iso2;PSD-93 iso2;PSD-93 iso2	472, 484;§348, §360;355, 367;287, 299;383, 395;306, 318;348, 360;383, 395	Disks large homolog 2	Q91XM9-7;Q91XM9;Q91XM9-2;Q91XM9-3;Q91XM9-4;Q91XM9-6;Q91XM9-8;Q91XM9-5	http://www.phosphosite.org/proteinAction.do?id=17674200&showAllSites=true	109.2	TRPPEPVySTVNKLC;KLCDKPAsPRHYSPV	Fyn	CSK	HMLGEDDYTRPPEPVY*STVNKLCDKPAS*PR	4	908.904	22201	22341	21796	21368	22153	21662	21448	22236	21723	21794	22217	21506	68.8439	67.9815	68.1223	66.6619	68.1307	66.7038	67.448	68.5746	67.4634	67.4081	68.3282	67.3048	3.6681	4.6083	3.8297	2.6178	4.601	4.1942	4.388	2.2795	5.2381	6.18
521	519	Adaptor/scaffold	Dlg2;Dlg2;Dlg2;Dlg2;Dlg2;Dlg2;Dlg2;Dlg2	PSD-93 iso2;PSD-93;PSD-93 iso2;PSD-93 iso2;PSD-93 iso2;PSD-93 iso2;PSD-93 iso2;PSD-93 iso2	472, 484;§348, §360;355, 367;287, 299;383, 395;306, 318;348, 360;383, 395	Disks large homolog 2	Q91XM9-7;Q91XM9;Q91XM9-2;Q91XM9-3;Q91XM9-4;Q91XM9-6;Q91XM9-8;Q91XM9-5	http://www.phosphosite.org/proteinAction.do?id=17674200&showAllSites=true	109.2	TRPPEPVySTVNKLC;KLCDKPAsPRHYSPV	Fyn	CSK	HMLGEDDYTRPPEPVY*STVNKLCDKPAS*PR	4	908.904	22012	21950	21601	21771		22289	21653	21941	21921	21680	21614	21699	68.3262	66.9418	67.59	67.7305		68.3719	68.0015	67.7895	67.9905	67.0948	66.7132	67.8238	3.7043	5.4783	3.9601	4.1606		2.5421	3.954	4.7634	3.7751	4.5898
522	520	Adaptor/scaffold	Dlg2;Dlg2;Dlg2;Dlg2;Dlg2;Dlg2;Dlg2;Dlg2	PSD-93 iso2;PSD-93;PSD-93 iso2;PSD-93 iso2;PSD-93 iso2;PSD-93 iso2;PSD-93 iso2;PSD-93 iso2	472, 484;§348, §360;355, 367;287, 299;383, 395;306, 318;348, 360;383, 395	Disks large homolog 2	Q91XM9-7;Q91XM9;Q91XM9-2;Q91XM9-3;Q91XM9-4;Q91XM9-6;Q91XM9-8;Q91XM9-5	http://www.phosphosite.org/proteinAction.do?id=17674200&showAllSites=true	109.2	TRPPEPVySTVNKLC;KLCDKPAsPRHYSPV	Fyn	CSK	HMLGEDDYTRPPEPVY*STVNKLCDKPAS*PR	4	908.904	21814	22538	21407	21569		21861	21848	21750		21989	22427	21324	67.7889	68.5109	67.0734	67.1947		67.2307	68.5291	67.2737		67.9285	68.8962	66.7979	4.4089	1.9108	1.9135	3.9127		4.921	3.9181	4.4666		4.2275
523	521	Adaptor/scaffold	Dlg2;Dlg2;Dlg2;Dlg2;Dlg2;Dlg2;Dlg2;Dlg2	PSD-93 iso2;PSD-93;PSD-93 iso2;PSD-93 iso2;PSD-93 iso2;PSD-93 iso2;PSD-93 iso2;PSD-93 iso2	472, 484;§348, §360;355, 367;287, 299;383, 395;306, 318;348, 360;383, 395	Disks large homolog 2	Q91XM9-7;Q91XM9;Q91XM9-2;Q91XM9-3;Q91XM9-4;Q91XM9-6;Q91XM9-8;Q91XM9-5	http://www.phosphosite.org/proteinAction.do?id=17674200&showAllSites=true	109.2	TRPPEPVySTVNKLC;KLCDKPAsPRHYSPV	Fyn	CSK	HMLGEDDYTRPPEPVY*STVNKLCDKPAS*PR	4	908.904	21617					22060	21252				22021		67.2605					67.7613	66.9177				67.8069		2.3073					4.7961	2.8134
524	522	Adaptor/scaffold	Dlg2;Dlg2;Dlg2;Dlg2;Dlg2;Dlg2;Dlg2;Dlg2	PSD-93 iso2;PSD-93;PSD-93 iso2;PSD-93 iso2;PSD-93 iso2;PSD-93 iso2;PSD-93 iso2;PSD-93 iso2	472, 484;§348, §360;355, 367;287, 299;383, 395;306, 318;348, 360;383, 395	Disks large homolog 2	Q91XM9-7;Q91XM9;Q91XM9-2;Q91XM9-3;Q91XM9-4;Q91XM9-6;Q91XM9-8;Q91XM9-5	http://www.phosphosite.org/proteinAction.do?id=17674200&showAllSites=true	109.2	TRPPEPVySTVNKLC;KLCDKPAsPRHYSPV	Fyn	CSK	HMLGEDDYTRPPEPVY*STVNKLCDKPAS*PR	4	908.904											21823												67.2756
525	523	Adaptor/scaffold	Dlg2;Dlg2;Dlg2;Dlg2;Dlg2;Dlg2;Dlg2;Dlg2	PSD-93 iso2;PSD-93;PSD-93 iso2;PSD-93 iso2;PSD-93 iso2;PSD-93 iso2;PSD-93 iso2;PSD-93 iso2	472, 484;§348, §360;355, 367;287, 299;383, 395;306, 318;348, 360;383, 395	Disks large homolog 2	Q91XM9-7;Q91XM9;Q91XM9-2;Q91XM9-3;Q91XM9-4;Q91XM9-6;Q91XM9-8;Q91XM9-5	http://www.phosphosite.org/proteinAction.do?id=17674200&showAllSites=true	109.2	TRPPEPVySTVNKLC;KLCDKPAsPRHYSPV	Fyn	CSK	HMLGEDDYTRPPEPVY*STVNKLCDKPAS*PR	4	908.904											22250												68.4223
526	524	Adaptor/scaffold	Dlg2;Dlg2;Dlg2;Dlg2;Dlg2;Dlg2;Dlg2;Dlg2	PSD-93 iso2;PSD-93;PSD-93 iso2;PSD-93 iso2;PSD-93 iso2;PSD-93 iso2;PSD-93 iso2;PSD-93 iso2	472, 484;§348, §360;355, 367;287, 299;383, 395;306, 318;348, 360;383, 395	Disks large homolog 2	Q91XM9-7;Q91XM9;Q91XM9-2;Q91XM9-3;Q91XM9-4;Q91XM9-6;Q91XM9-8;Q91XM9-5	http://www.phosphosite.org/proteinAction.do?id=17674200&showAllSites=true	109.2	TRPPEPVySTVNKLC;KLCDKPAsPRHYSPV	Fyn	CSK	HMLGEDDYTRPPEPVY*STVNKLCDKPAS*PR	5	727.325		22067		21672				21782			22072	21565		67.2559		67.4691				67.364			67.9421	67.465		3.805		2.4379				3.0481
527	525	Adaptor/scaffold	Dlg2;Dlg2;Dlg2;Dlg2;Dlg2;Dlg2;Dlg2;Dlg2	PSD-93 iso2;PSD-93;PSD-93 iso2;PSD-93 iso2;PSD-93 iso2;PSD-93 iso2;PSD-93 iso2;PSD-93 iso2	472, 484;§348, §360;355, 367;287, 299;383, 395;306, 318;348, 360;383, 395	Disks large homolog 2	Q91XM9-7;Q91XM9;Q91XM9-2;Q91XM9-3;Q91XM9-4;Q91XM9-6;Q91XM9-8;Q91XM9-5	http://www.phosphosite.org/proteinAction.do?id=17674200&showAllSites=true	109.2	TRPPEPVySTVNKLC;KLCDKPAsPRHYSPV	Fyn	CSK	HMLGEDDYTRPPEPVY*STVNKLCDKPAS*PR	5	727.325											22060	21582											67.9112	67.5106
528	526	Adaptor/scaffold	Dlg2;Dlg2;Dlg2;Dlg2;Dlg2;Dlg2;Dlg2;Dlg2	PSD-93 iso2;PSD-93;PSD-93 iso2;PSD-93 iso2;PSD-93 iso2;PSD-93 iso2;PSD-93 iso2;PSD-93 iso2	472, 484;§348, §360;355, 367;287, 299;383, 395;306, 318;348, 360;383, 395	Disks large homolog 2	Q91XM9-7;Q91XM9;Q91XM9-2;Q91XM9-3;Q91XM9-4;Q91XM9-6;Q91XM9-8;Q91XM9-5	http://www.phosphosite.org/proteinAction.do?id=17674200&showAllSites=true	109.2	TRPPEPVySTVNKLC;KLCDKPAsPRHYSPV	Fyn	CSK	HMLGEDDYTRPPEPVY*STVNKLCDKPAS*PR	5	727.325											21999	21790											67.7494	68.0658
529	527	Adaptor/scaffold	Dlg2;Dlg2;Dlg2;Dlg2;Dlg2;Dlg2;Dlg2;Dlg2	PSD-93 iso2;PSD-93;PSD-93 iso2;PSD-93 iso2;PSD-93 iso2;PSD-93 iso2;PSD-93 iso2;PSD-93 iso2	472;§348;355;287;383;306;348;383	Disks large homolog 2	Q91XM9-7;Q91XM9;Q91XM9-2;Q91XM9-3;Q91XM9-4;Q91XM9-6;Q91XM9-8;Q91XM9-5	http://www.phosphosite.org/proteinAction.do?id=17674200&showAllSites=true	109.2	TRPPEPVySTVNKLC	Fyn	CSK	HM#LGEDDYTRPPEPVY*STVNK	3	848.709	16601	17562	16739	16099	17073	16384	16556	16250	16396	16436	16428	17762	53.5571	55.1816	54.4652	52.4943	54.5005	52.6065	54.2557	52.498	53.1608	53.0226	52.7546	57.2821	5.7509	3.2176	2.5533	4.0252	3.2166	5.2724	3.3135	3.6782	4.97	6.387
530	528	Adaptor/scaffold	Dlg2;Dlg2;Dlg2;Dlg2;Dlg2;Dlg2;Dlg2;Dlg2	PSD-93 iso2;PSD-93;PSD-93 iso2;PSD-93 iso2;PSD-93 iso2;PSD-93 iso2;PSD-93 iso2;PSD-93 iso2	472;§348;355;287;383;306;348;383	Disks large homolog 2	Q91XM9-7;Q91XM9;Q91XM9-2;Q91XM9-3;Q91XM9-4;Q91XM9-6;Q91XM9-8;Q91XM9-5	http://www.phosphosite.org/proteinAction.do?id=17674200&showAllSites=true	109.2	TRPPEPVySTVNKLC	Fyn	CSK	HM#LGEDDYTRPPEPVY*STVNK	3	848.709	16789	17751	17698	16496	16944	16579	16401	17038	16590	16634	17407	16401	54.0695	55.6916	57.0807	53.558	54.1589	53.1246	53.832	54.6107	53.6903	53.5601	55.3868	53.628	5.3463	3.3231	1.3074	4.2137	3.3487	5.1504	4.1394	3.3157	5.1667	4.8419
531	529	Adaptor/scaffold	Dlg2;Dlg2;Dlg2;Dlg2;Dlg2;Dlg2;Dlg2;Dlg2	PSD-93 iso2;PSD-93;PSD-93 iso2;PSD-93 iso2;PSD-93 iso2;PSD-93 iso2;PSD-93 iso2;PSD-93 iso2	472;§348;355;287;383;306;348;383	Disks large homolog 2	Q91XM9-7;Q91XM9;Q91XM9-2;Q91XM9-3;Q91XM9-4;Q91XM9-6;Q91XM9-8;Q91XM9-5	http://www.phosphosite.org/proteinAction.do?id=17674200&showAllSites=true	109.2	TRPPEPVySTVNKLC	Fyn	CSK	HM#LGEDDYTRPPEPVY*STVNK	3	848.709	17810	17158	17412	16298	17277	17098	16198	17300	16753	17365	17002	16598	56.8942	54.1117	56.3082	53.0264	55.0471	54.5065	53.2834	55.3099	54.1274	55.5278	54.3084	54.1564	1.1232	4.0321	1.5195	5.5279	3.4551	2.8161	5.5618	3.1862	3.7691	3.2624
532	530	Adaptor/scaffold	Dlg2;Dlg2;Dlg2;Dlg2;Dlg2;Dlg2;Dlg2;Dlg2	PSD-93 iso2;PSD-93;PSD-93 iso2;PSD-93 iso2;PSD-93 iso2;PSD-93 iso2;PSD-93 iso2;PSD-93 iso2	472;§348;355;287;383;306;348;383	Disks large homolog 2	Q91XM9-7;Q91XM9;Q91XM9-2;Q91XM9-3;Q91XM9-4;Q91XM9-6;Q91XM9-8;Q91XM9-5	http://www.phosphosite.org/proteinAction.do?id=17674200&showAllSites=true	109.2	TRPPEPVySTVNKLC	Fyn	CSK	HM#LGEDDYTRPPEPVY*STVNK	3	848.709	16521	16552	16954	16699	16848	16930	16717	17710	16994	17101	17462	16202	53.3275	52.4897	55.0565	54.108	53.8959	54.0602	54.6861	56.4073	54.7763	54.8164	55.5436	53.0992	3.661	4.0349	2.7768	4.2931	3.5239	4.1556	2.8047	2.6065	2.7686	3.0694
533	531	Adaptor/scaffold	Dlg2;Dlg2;Dlg2;Dlg2;Dlg2;Dlg2;Dlg2;Dlg2	PSD-93 iso2;PSD-93;PSD-93 iso2;PSD-93 iso2;PSD-93 iso2;PSD-93 iso2;PSD-93 iso2;PSD-93 iso2	472;§348;355;287;383;306;348;383	Disks large homolog 2	Q91XM9-7;Q91XM9;Q91XM9-2;Q91XM9-3;Q91XM9-4;Q91XM9-6;Q91XM9-8;Q91XM9-5	http://www.phosphosite.org/proteinAction.do?id=17674200&showAllSites=true	109.2	TRPPEPVySTVNKLC	Fyn	CSK	HM#LGEDDYTRPPEPVY*STVNK	3	848.709		16962	16526	16083	16439	17238	16872	16273	16100	17237	17603	16997		53.5862	53.875	52.4511	52.8041	54.8781	55.1132	52.5593	52.3698	55.1779	55.9249	55.2206		5.1138	3.7958	4.0549	2.3777	3.6898	1.8973	4.3588	1.5321	3.756
534	532	Adaptor/scaffold	Dlg2;Dlg2;Dlg2;Dlg2;Dlg2;Dlg2;Dlg2;Dlg2	PSD-93 iso2;PSD-93;PSD-93 iso2;PSD-93 iso2;PSD-93 iso2;PSD-93 iso2;PSD-93 iso2;PSD-93 iso2	472;§348;355;287;383;306;348;383	Disks large homolog 2	Q91XM9-7;Q91XM9;Q91XM9-2;Q91XM9-3;Q91XM9-4;Q91XM9-6;Q91XM9-8;Q91XM9-5	http://www.phosphosite.org/proteinAction.do?id=17674200&showAllSites=true	109.2	TRPPEPVySTVNKLC	Fyn	CSK	HM#LGEDDYTRPPEPVY*STVNK	3	848.709		16750	16324	17184	16638	16728		16838	16199	16239	17805	16794		53.0179	53.3252	55.4056	53.336	53.5212		54.0748	52.6328	52.4874	56.4718	54.6771		5.4177	6.2691	1.6069	5.299	3.7182		4.9426	2.5524	3.8938
535	533	Adaptor/scaffold	Dlg2;Dlg2;Dlg2;Dlg2;Dlg2;Dlg2;Dlg2;Dlg2	PSD-93 iso2;PSD-93;PSD-93 iso2;PSD-93 iso2;PSD-93 iso2;PSD-93 iso2;PSD-93 iso2;PSD-93 iso2	472;§348;355;287;383;306;348;383	Disks large homolog 2	Q91XM9-7;Q91XM9;Q91XM9-2;Q91XM9-3;Q91XM9-4;Q91XM9-6;Q91XM9-8;Q91XM9-5	http://www.phosphosite.org/proteinAction.do?id=17674200&showAllSites=true	109.2	TRPPEPVySTVNKLC	Fyn	CSK	HM#LGEDDYTRPPEPVY*STVNK	3	848.709		17762	16130	17651		17482		16437	17087		16620	17093		55.7201	52.7979	56.659		55.5319		53.0006	55.0237		53.2743	55.4837		3.8699	2.986	1.8989		3.1181		5.3922	2.4849
536	534	Adaptor/scaffold	Dlg2;Dlg2;Dlg2;Dlg2;Dlg2;Dlg2;Dlg2;Dlg2	PSD-93 iso2;PSD-93;PSD-93 iso2;PSD-93 iso2;PSD-93 iso2;PSD-93 iso2;PSD-93 iso2;PSD-93 iso2	472;§348;355;287;383;306;348;383	Disks large homolog 2	Q91XM9-7;Q91XM9;Q91XM9-2;Q91XM9-3;Q91XM9-4;Q91XM9-6;Q91XM9-8;Q91XM9-5	http://www.phosphosite.org/proteinAction.do?id=17674200&showAllSites=true	109.2	TRPPEPVySTVNKLC	Fyn	CSK	HM#LGEDDYTRPPEPVY*STVNK	3	848.709		17359				16781		16635			16812	17590		54.6438				53.6628		53.5295			53.7902	56.8129		3.754				4.4222		6.4523
537	535	Adaptor/scaffold	Dlg2;Dlg2;Dlg2;Dlg2;Dlg2;Dlg2;Dlg2;Dlg2	PSD-93 iso2;PSD-93;PSD-93 iso2;PSD-93 iso2;PSD-93 iso2;PSD-93 iso2;PSD-93 iso2;PSD-93 iso2	472;§348;355;287;383;306;348;383	Disks large homolog 2	Q91XM9-7;Q91XM9;Q91XM9-2;Q91XM9-3;Q91XM9-4;Q91XM9-6;Q91XM9-8;Q91XM9-5	http://www.phosphosite.org/proteinAction.do?id=17674200&showAllSites=true	109.2	TRPPEPVySTVNKLC	Fyn	CSK	HM#LGEDDYTRPPEPVY*STVNK	3	848.709		17972						17007				16006		56.2769						54.5281				52.569		3.448						4.2192
538	536	Adaptor/scaffold	Dlg2;Dlg2;Dlg2;Dlg2;Dlg2;Dlg2;Dlg2;Dlg2	PSD-93 iso2;PSD-93;PSD-93 iso2;PSD-93 iso2;PSD-93 iso2;PSD-93 iso2;PSD-93 iso2;PSD-93 iso2	472;§348;355;287;383;306;348;383	Disks large homolog 2	Q91XM9-7;Q91XM9;Q91XM9-2;Q91XM9-3;Q91XM9-4;Q91XM9-6;Q91XM9-8;Q91XM9-5	http://www.phosphosite.org/proteinAction.do?id=17674200&showAllSites=true	109.2	TRPPEPVySTVNKLC	Fyn	CSK	HM#LGEDDYTRPPEPVY*STVNK	3	848.709		17499												55.0134												3.7275
539	537	Adaptor/scaffold	Dlg2;Dlg2;Dlg2;Dlg2;Dlg2;Dlg2;Dlg2;Dlg2	PSD-93 iso2;PSD-93;PSD-93 iso2;PSD-93 iso2;PSD-93 iso2;PSD-93 iso2;PSD-93 iso2;PSD-93 iso2	472;§348;355;287;383;306;348;383	Disks large homolog 2	Q91XM9-7;Q91XM9;Q91XM9-2;Q91XM9-3;Q91XM9-4;Q91XM9-6;Q91XM9-8;Q91XM9-5	http://www.phosphosite.org/proteinAction.do?id=17674200&showAllSites=true	109.2	TRPPEPVySTVNKLC	Fyn	CSK	HM#LGEDDYTRPPEPVY*STVNK	4	636.783	16606			16320			16169	16493	16375		16551	16122	53.5712			53.0859			53.2061	53.1495	53.1056		53.0863	52.8806	1.889			3.7803			3.2111	3.3799	3.5092
540	538	Adaptor/scaffold	Dlg2;Dlg2;Dlg2;Dlg2;Dlg2;Dlg2;Dlg2;Dlg2	PSD-93 iso2;PSD-93;PSD-93 iso2;PSD-93 iso2;PSD-93 iso2;PSD-93 iso2;PSD-93 iso2;PSD-93 iso2	472;§348;355;287;383;306;348;383	Disks large homolog 2	Q91XM9-7;Q91XM9;Q91XM9-2;Q91XM9-3;Q91XM9-4;Q91XM9-6;Q91XM9-8;Q91XM9-5	http://www.phosphosite.org/proteinAction.do?id=17674200&showAllSites=true	109.2	TRPPEPVySTVNKLC	Fyn	CSK	HM#LGEDDYTRPPEPVY*STVNK	4	636.783	16671										16652		53.7451										53.3595		2.5009
541	539	Adaptor/scaffold	Dlg2;Dlg2;Dlg2;Dlg2;Dlg2;Dlg2;Dlg2;Dlg2	PSD-93 iso2;PSD-93;PSD-93 iso2;PSD-93 iso2;PSD-93 iso2;PSD-93 iso2;PSD-93 iso2;PSD-93 iso2	472;§348;355;287;383;306;348;383	Disks large homolog 2	Q91XM9-7;Q91XM9;Q91XM9-2;Q91XM9-3;Q91XM9-4;Q91XM9-6;Q91XM9-8;Q91XM9-5	http://www.phosphosite.org/proteinAction.do?id=17674200&showAllSites=true	109.2	TRPPEPVySTVNKLC	Fyn	CSK	HM#LGEDDYTRPPEPVY*STVNKLCDKPASPR	4	892.911						19918	19316											62.0483	61.7482											4.2738	1.7107
542	540	Adaptor/scaffold	Dlg2;Dlg2;Dlg2;Dlg2;Dlg2;Dlg2;Dlg2;Dlg2	PSD-93 iso2;PSD-93;PSD-93 iso2;PSD-93 iso2;PSD-93 iso2;PSD-93 iso2;PSD-93 iso2;PSD-93 iso2	472;§348;355;287;383;306;348;383	Disks large homolog 2	Q91XM9-7;Q91XM9;Q91XM9-2;Q91XM9-3;Q91XM9-4;Q91XM9-6;Q91XM9-8;Q91XM9-5	http://www.phosphosite.org/proteinAction.do?id=17674200&showAllSites=true	109.2	TRPPEPVySTVNKLC	Fyn	CSK	HM#LGEDDYTRPPEPVY*STVNKLCDKPASPR	4	892.911						19741	19507											61.5624	62.2567											3.5768	2.9911
543	541	Adaptor/scaffold	Dlg2;Dlg2;Dlg2;Dlg2;Dlg2;Dlg2;Dlg2;Dlg2	PSD-93 iso2;PSD-93;PSD-93 iso2;PSD-93 iso2;PSD-93 iso2;PSD-93 iso2;PSD-93 iso2;PSD-93 iso2	472;§348;355;287;383;306;348;383	Disks large homolog 2	Q91XM9-7;Q91XM9;Q91XM9-2;Q91XM9-3;Q91XM9-4;Q91XM9-6;Q91XM9-8;Q91XM9-5	http://www.phosphosite.org/proteinAction.do?id=17674200&showAllSites=true	109.2	TRPPEPVySTVNKLC	Fyn	CSK	HM#LGEDDYTRPPEPVY*STVNKLCDKPASPR	4	892.911						19848												61.8526												3.8034
544	542	Adaptor/scaffold	Dlg2;Dlg2;Dlg2;Dlg2;Dlg2;Dlg2;Dlg2;Dlg2	PSD-93 iso2;PSD-93;PSD-93 iso2;PSD-93 iso2;PSD-93 iso2;PSD-93 iso2;PSD-93 iso2;PSD-93 iso2	472;§348;355;287;383;306;348;383	Disks large homolog 2	Q91XM9-7;Q91XM9;Q91XM9-2;Q91XM9-3;Q91XM9-4;Q91XM9-6;Q91XM9-8;Q91XM9-5	http://www.phosphosite.org/proteinAction.do?id=17674200&showAllSites=true	109.2	TRPPEPVySTVNKLC	Fyn	CSK	HM#LGEDDYTRPPEPVY*STVNKLCDKPASPR	5	714.531	19783	19930	19679	19600	19827	19907	19523	19572	19777	19665	19722	19473	62.2981	61.5304	62.4284	61.8902	61.8976	62.018	62.2997	61.4271	62.2374	61.6942	61.6378	61.8626	4.1402	7.5101	5.5864	7.5599	4.6649	7.2105	6.6157	5.6637	5.2381	7.958
545	543	Adaptor/scaffold	Dlg2;Dlg2;Dlg2;Dlg2;Dlg2;Dlg2;Dlg2;Dlg2	PSD-93 iso2;PSD-93;PSD-93 iso2;PSD-93 iso2;PSD-93 iso2;PSD-93 iso2;PSD-93 iso2;PSD-93 iso2	472;§348;355;287;383;306;348;383	Disks large homolog 2	Q91XM9-7;Q91XM9;Q91XM9-2;Q91XM9-3;Q91XM9-4;Q91XM9-6;Q91XM9-8;Q91XM9-5	http://www.phosphosite.org/proteinAction.do?id=17674200&showAllSites=true	109.2	TRPPEPVySTVNKLC	Fyn	CSK	HM#LGEDDYTRPPEPVY*STVNKLCDKPASPR	5	714.531	19986	19819	19589	19473	20127	19816	19408	19789	19566	19581	19936	19350	62.8371	61.2349	62.1801	61.5554	62.6966	61.7676	61.9944	62.002	61.6753	61.4696	62.2129	61.5362	4.0267	4.7423	5.3077	6.4809	4.1162	8.4566	5.5435	6.5482	3.3545	4.8703
546	544	Adaptor/scaffold	Dlg2;Dlg2;Dlg2;Dlg2;Dlg2;Dlg2;Dlg2;Dlg2	PSD-93 iso2;PSD-93;PSD-93 iso2;PSD-93 iso2;PSD-93 iso2;PSD-93 iso2;PSD-93 iso2;PSD-93 iso2	472;§348;355;287;383;306;348;383	Disks large homolog 2	Q91XM9-7;Q91XM9;Q91XM9-2;Q91XM9-3;Q91XM9-4;Q91XM9-6;Q91XM9-8;Q91XM9-5	http://www.phosphosite.org/proteinAction.do?id=17674200&showAllSites=true	109.2	TRPPEPVySTVNKLC	Fyn	CSK	HM#LGEDDYTRPPEPVY*STVNKLCDKPASPR	5	714.531	20154	20003	19487		20064	19686	19301	19818		19850	19897	19557	63.2912	61.7254	61.9027		62.5268	61.4139	61.7096	62.0781		62.183	62.1083	62.0873	1.6716	7.1867	3.4564		6.6613	6.5725	2.3626	6.8067		6.7852
547	545	Adaptor/scaffold	Dlg2;Dlg2;Dlg2;Dlg2;Dlg2;Dlg2;Dlg2;Dlg2	PSD-93 iso2;PSD-93;PSD-93 iso2;PSD-93 iso2;PSD-93 iso2;PSD-93 iso2;PSD-93 iso2;PSD-93 iso2	472;§348;355;287;383;306;348;383	Disks large homolog 2	Q91XM9-7;Q91XM9;Q91XM9-2;Q91XM9-3;Q91XM9-4;Q91XM9-6;Q91XM9-8;Q91XM9-5	http://www.phosphosite.org/proteinAction.do?id=17674200&showAllSites=true	109.2	TRPPEPVySTVNKLC	Fyn	CSK	HM#LGEDDYTRPPEPVY*STVNKLCDKPASPR	5	714.531	19797	20057								19803			62.3338	61.8678								62.0593			4.4808	6.2222								6.8916
548	546	Adaptor/scaffold	Dlg2;Dlg2;Dlg2;Dlg2;Dlg2;Dlg2;Dlg2;Dlg2	PSD-93 iso2;PSD-93;PSD-93 iso2;PSD-93 iso2;PSD-93 iso2;PSD-93 iso2;PSD-93 iso2;PSD-93 iso2	472;§348;355;287;383;306;348;383	Disks large homolog 2	Q91XM9-7;Q91XM9;Q91XM9-2;Q91XM9-3;Q91XM9-4;Q91XM9-6;Q91XM9-8;Q91XM9-5	http://www.phosphosite.org/proteinAction.do?id=17674200&showAllSites=true	109.2	TRPPEPVySTVNKLC	Fyn	CSK	HM#LGEDDYTRPPEPVY*STVNKLCDKPASPR	5	714.531		20325												62.585												2.1217
549	547	Adaptor/scaffold	Dlg2;Dlg2;Dlg2;Dlg2;Dlg2;Dlg2;Dlg2;Dlg2	PSD-93 iso2;PSD-93;PSD-93 iso2;PSD-93 iso2;PSD-93 iso2;PSD-93 iso2;PSD-93 iso2;PSD-93 iso2	472;§348;355;287;383;306;348;383	Disks large homolog 2	Q91XM9-7;Q91XM9;Q91XM9-2;Q91XM9-3;Q91XM9-4;Q91XM9-6;Q91XM9-8;Q91XM9-5	http://www.phosphosite.org/proteinAction.do?id=17674200&showAllSites=true	109.2	TRPPEPVySTVNKLC	Fyn	CSK	HMLGEDDYTRPPEPVY*STVNK	2	1264.56						18370												57.9092												1.8192
550	548	Adaptor/scaffold	Dlg2;Dlg2;Dlg2;Dlg2;Dlg2;Dlg2;Dlg2;Dlg2	PSD-93 iso2;PSD-93;PSD-93 iso2;PSD-93 iso2;PSD-93 iso2;PSD-93 iso2;PSD-93 iso2;PSD-93 iso2	472;§348;355;287;383;306;348;383	Disks large homolog 2	Q91XM9-7;Q91XM9;Q91XM9-2;Q91XM9-3;Q91XM9-4;Q91XM9-6;Q91XM9-8;Q91XM9-5	http://www.phosphosite.org/proteinAction.do?id=17674200&showAllSites=true	109.2	TRPPEPVySTVNKLC	Fyn	CSK	HMLGEDDYTRPPEPVY*STVNK	3	843.377	40093	42545	18323	18056	18274	18130	17747	18077	18373	18264	18336	17959	118.309	123.536	58.7561	57.743	57.7319	57.2736	57.5117	57.3893	58.4733	57.9346	57.9004	57.8116	3.4605	3.9298	2.8572	5.6428	5.6248	5.8689	5.6355	6.2741	2.3128	5.7276
551	549	Adaptor/scaffold	Dlg2;Dlg2;Dlg2;Dlg2;Dlg2;Dlg2;Dlg2;Dlg2	PSD-93 iso2;PSD-93;PSD-93 iso2;PSD-93 iso2;PSD-93 iso2;PSD-93 iso2;PSD-93 iso2;PSD-93 iso2	472;§348;355;287;383;306;348;383	Disks large homolog 2	Q91XM9-7;Q91XM9;Q91XM9-2;Q91XM9-3;Q91XM9-4;Q91XM9-6;Q91XM9-8;Q91XM9-5	http://www.phosphosite.org/proteinAction.do?id=17674200&showAllSites=true	109.2	TRPPEPVySTVNKLC	Fyn	CSK	HMLGEDDYTRPPEPVY*STVNK	3	843.377	18389	18520	17901	17856	18478	18328	17766	18275	18214	18507	18538	17766	58.4623	57.7462	57.6255	57.2058	58.2725	57.798	57.5654	57.9176	58.0472	58.5842	58.4408	57.2917	4.9209	5.6598	5.3537	4.6953	5.4933	5.4002	6.3787	5.3642	5.5369	2.2439
552	550	Adaptor/scaffold	Dlg2;Dlg2;Dlg2;Dlg2;Dlg2;Dlg2;Dlg2;Dlg2	PSD-93 iso2;PSD-93;PSD-93 iso2;PSD-93 iso2;PSD-93 iso2;PSD-93 iso2;PSD-93 iso2;PSD-93 iso2	472;§348;355;287;383;306;348;383	Disks large homolog 2	Q91XM9-7;Q91XM9;Q91XM9-2;Q91XM9-3;Q91XM9-4;Q91XM9-6;Q91XM9-8;Q91XM9-5	http://www.phosphosite.org/proteinAction.do?id=17674200&showAllSites=true	109.2	TRPPEPVySTVNKLC	Fyn	CSK	HMLGEDDYTRPPEPVY*STVNK	3	843.377	18202	18320	18224	18234			17963	18475	18015	18066	18143	18162	57.9558	57.2192	58.4923	58.2177			58.0922	58.4504	57.5181	57.408	57.3818	58.3595	6.2127	5.6935	3.149	4.3373			5.6019	2.994	5.6048	5.8847
553	551	Adaptor/scaffold	Dlg2;Dlg2;Dlg2;Dlg2;Dlg2;Dlg2;Dlg2;Dlg2	PSD-93 iso2;PSD-93;PSD-93 iso2;PSD-93 iso2;PSD-93 iso2;PSD-93 iso2;PSD-93 iso2;PSD-93 iso2	472;§348;355;287;383;306;348;383	Disks large homolog 2	Q91XM9-7;Q91XM9;Q91XM9-2;Q91XM9-3;Q91XM9-4;Q91XM9-6;Q91XM9-8;Q91XM9-5	http://www.phosphosite.org/proteinAction.do?id=17674200&showAllSites=true	109.2	TRPPEPVySTVNKLC	Fyn	CSK	HMLGEDDYTRPPEPVY*STVNK	3	843.377			17860												57.5143												4.2756
554	552	Adaptor/scaffold	Dlg2;Dlg2;Dlg2;Dlg2;Dlg2;Dlg2;Dlg2;Dlg2	PSD-93 iso2;PSD-93;PSD-93 iso2;PSD-93 iso2;PSD-93 iso2;PSD-93 iso2;PSD-93 iso2;PSD-93 iso2	472;§348;355;287;383;306;348;383	Disks large homolog 2	Q91XM9-7;Q91XM9;Q91XM9-2;Q91XM9-3;Q91XM9-4;Q91XM9-6;Q91XM9-8;Q91XM9-5	http://www.phosphosite.org/proteinAction.do?id=17674200&showAllSites=true	109.2	TRPPEPVySTVNKLC	Fyn	CSK	HMLGEDDYTRPPEPVY*STVNK	3	843.377			18100												58.1598												5.3022
555	553	Adaptor/scaffold	Dlg2;Dlg2;Dlg2;Dlg2;Dlg2;Dlg2;Dlg2;Dlg2	PSD-93 iso2;PSD-93;PSD-93 iso2;PSD-93 iso2;PSD-93 iso2;PSD-93 iso2;PSD-93 iso2;PSD-93 iso2	472;§348;355;287;383;306;348;383	Disks large homolog 2	Q91XM9-7;Q91XM9;Q91XM9-2;Q91XM9-3;Q91XM9-4;Q91XM9-6;Q91XM9-8;Q91XM9-5	http://www.phosphosite.org/proteinAction.do?id=17674200&showAllSites=true	109.2	TRPPEPVySTVNKLC	Fyn	CSK	HMLGEDDYTRPPEPVY*STVNK	4	632.785	18391	18474	18030	17972		18295		18176	18139	18161	18256	17809	58.4692	57.6256	57.9691	57.522		57.7126		57.6532	57.8498	57.6595	57.6841	57.4057	2.9356	5.3589	3.519	3.8171		4.2658		4.3797	3.858	4.3739
556	554	Adaptor/scaffold	Dlg2;Dlg2;Dlg2;Dlg2;Dlg2;Dlg2;Dlg2;Dlg2	PSD-93 iso2;PSD-93;PSD-93 iso2;PSD-93 iso2;PSD-93 iso2;PSD-93 iso2;PSD-93 iso2;PSD-93 iso2	472;§348;355;287;383;306;348;383	Disks large homolog 2	Q91XM9-7;Q91XM9;Q91XM9-2;Q91XM9-3;Q91XM9-4;Q91XM9-6;Q91XM9-8;Q91XM9-5	http://www.phosphosite.org/proteinAction.do?id=17674200&showAllSites=true	109.2	TRPPEPVySTVNKLC	Fyn	CSK	HMLGEDDYTRPPEPVY*STVNK	4	632.785	18307	18404											58.2356	57.4406											3.494	4.4118
557	555	Adaptor/scaffold	Dlg2;Dlg2;Dlg2;Dlg2;Dlg2;Dlg2;Dlg2;Dlg2	PSD-93 iso2;PSD-93;PSD-93 iso2;PSD-93 iso2;PSD-93 iso2;PSD-93 iso2;PSD-93 iso2;PSD-93 iso2	472;§348;355;287;383;306;348;383	Disks large homolog 2	Q91XM9-7;Q91XM9;Q91XM9-2;Q91XM9-3;Q91XM9-4;Q91XM9-6;Q91XM9-8;Q91XM9-5	http://www.phosphosite.org/proteinAction.do?id=17674200&showAllSites=true	109.2	TRPPEPVySTVNKLC	Fyn	CSK	HMLGEDDYTRPPEPVY*STVNKLCDKPASPR	4	888.913		21343	20784		21043	20905	20645	20781	20821	20874				65.3238	65.386		65.1459	64.6767	65.2882	64.6543	65.0132	64.9216				4.68	3.2604		4.5466	6.0865	4.2562	4.741	3.8572	4.7655
558	556	Adaptor/scaffold	Dlg2;Dlg2;Dlg2;Dlg2;Dlg2;Dlg2;Dlg2;Dlg2	PSD-93 iso2;PSD-93;PSD-93 iso2;PSD-93 iso2;PSD-93 iso2;PSD-93 iso2;PSD-93 iso2;PSD-93 iso2	472;§348;355;287;383;306;348;383	Disks large homolog 2	Q91XM9-7;Q91XM9;Q91XM9-2;Q91XM9-3;Q91XM9-4;Q91XM9-6;Q91XM9-8;Q91XM9-5	http://www.phosphosite.org/proteinAction.do?id=17674200&showAllSites=true	109.2	TRPPEPVySTVNKLC	Fyn	CSK	HMLGEDDYTRPPEPVY*STVNKLCDKPASPR	4	888.913		21005	20570			20841				21001				64.412	64.8176			64.5085				65.2642				5.361	3.0889			5.2566				5.2423
559	557	Adaptor/scaffold	Dlg2;Dlg2;Dlg2;Dlg2;Dlg2;Dlg2;Dlg2;Dlg2	PSD-93 iso2;PSD-93;PSD-93 iso2;PSD-93 iso2;PSD-93 iso2;PSD-93 iso2;PSD-93 iso2;PSD-93 iso2	472;§348;355;287;383;306;348;383	Disks large homolog 2	Q91XM9-7;Q91XM9;Q91XM9-2;Q91XM9-3;Q91XM9-4;Q91XM9-6;Q91XM9-8;Q91XM9-5	http://www.phosphosite.org/proteinAction.do?id=17674200&showAllSites=true	109.2	TRPPEPVySTVNKLC	Fyn	CSK	HMLGEDDYTRPPEPVY*STVNKLCDKPASPR	5	711.332	20957	21048	20562	20520	21166	21242	20425	20907	20682	20770	20970	20391	65.4645	64.5329	64.7964	64.3532	65.4855	65.5788	64.697	64.9909	64.6428	64.641	64.9639	64.2991	8.5654	9.4132	4.4565	5.8107	6.8995	3.3765	4.7539	8.8095	4.8065	7.4076
560	558	Adaptor/scaffold	Dlg2;Dlg2;Dlg2;Dlg2;Dlg2;Dlg2;Dlg2;Dlg2	PSD-93 iso2;PSD-93;PSD-93 iso2;PSD-93 iso2;PSD-93 iso2;PSD-93 iso2;PSD-93 iso2;PSD-93 iso2	472;§348;355;287;383;306;348;383	Disks large homolog 2	Q91XM9-7;Q91XM9;Q91XM9-2;Q91XM9-3;Q91XM9-4;Q91XM9-6;Q91XM9-8;Q91XM9-5	http://www.phosphosite.org/proteinAction.do?id=17674200&showAllSites=true	109.2	TRPPEPVySTVNKLC	Fyn	CSK	HMLGEDDYTRPPEPVY*STVNKLCDKPASPR	5	711.332	21216	21112	20792	20701	20871	21028	20663	20708	20909	20975	20772	20661	66.1563	64.703	65.4073	64.8439	64.6868	65.006	65.3355	64.4616	65.2505	65.1948	64.4415	65.0169	3.6471	8.1584	6.5258	6.9409	4.169	7.321	7.9476	6.6435	6.687	7.7351
561	559	Adaptor/scaffold	Dlg2;Dlg2;Dlg2;Dlg2;Dlg2;Dlg2;Dlg2;Dlg2	PSD-93 iso2;PSD-93;PSD-93 iso2;PSD-93 iso2;PSD-93 iso2;PSD-93 iso2;PSD-93 iso2;PSD-93 iso2	472;§348;355;287;383;306;348;383	Disks large homolog 2	Q91XM9-7;Q91XM9;Q91XM9-2;Q91XM9-3;Q91XM9-4;Q91XM9-6;Q91XM9-8;Q91XM9-5	http://www.phosphosite.org/proteinAction.do?id=17674200&showAllSites=true	109.2	TRPPEPVySTVNKLC	Fyn	CSK	HMLGEDDYTRPPEPVY*STVNKLCDKPASPR	5	711.332	20762	20921	20534	20510	20892	20904	20836		21028	20983	21202	20430	64.9427	64.1774	64.7204	64.3272	64.7414	64.6744	65.7998		65.57	65.2142	65.5917	64.4034	3.3823	6.2927	4.0754	5.4424	4.8766	8.1408	2.8533		4.999	6.1596
562	560	Adaptor/scaffold	Dlg2;Dlg2;Dlg2;Dlg2;Dlg2;Dlg2;Dlg2;Dlg2	PSD-93 iso2;PSD-93;PSD-93 iso2;PSD-93 iso2;PSD-93 iso2;PSD-93 iso2;PSD-93 iso2;PSD-93 iso2	472;§348;355;287;383;306;348;383	Disks large homolog 2	Q91XM9-7;Q91XM9;Q91XM9-2;Q91XM9-3;Q91XM9-4;Q91XM9-6;Q91XM9-8;Q91XM9-5	http://www.phosphosite.org/proteinAction.do?id=17674200&showAllSites=true	109.2	TRPPEPVySTVNKLC	Fyn	CSK	HMLGEDDYTRPPEPVY*STVNKLCDKPASPR	5	711.332	21090	20900	20765		21089	20826					20740		65.8155	64.1195	65.3339		65.2731	64.468					64.3562		7.847	4.5836	6.7022		8.4719	8.3853
563	561	Adaptor/scaffold	Dlg2;Dlg2;Dlg2;Dlg2;Dlg2;Dlg2;Dlg2;Dlg2	PSD-93 iso2;PSD-93;PSD-93 iso2;PSD-93 iso2;PSD-93 iso2;PSD-93 iso2;PSD-93 iso2;PSD-93 iso2	472;§348;355;287;383;306;348;383	Disks large homolog 2	Q91XM9-7;Q91XM9;Q91XM9-2;Q91XM9-3;Q91XM9-4;Q91XM9-6;Q91XM9-8;Q91XM9-5	http://www.phosphosite.org/proteinAction.do?id=17674200&showAllSites=true	109.2	TRPPEPVySTVNKLC	Fyn	CSK	HMLGEDDYTRPPEPVY*STVNKLCDKPASPR	5	711.332	20746	21337											64.8975	65.3071											3.4559	7.2961
564	562	Adaptor/scaffold	Dlg2;Dlg2;Dlg2;Dlg2;Dlg2;Dlg2;Dlg2;Dlg2	PSD-93 iso2;PSD-93;PSD-93 iso2;PSD-93 iso2;PSD-93 iso2;PSD-93 iso2;PSD-93 iso2;PSD-93 iso2	472;§348;355;287;383;306;348;383	Disks large homolog 2	Q91XM9-7;Q91XM9;Q91XM9-2;Q91XM9-3;Q91XM9-4;Q91XM9-6;Q91XM9-8;Q91XM9-5	http://www.phosphosite.org/proteinAction.do?id=17674200&showAllSites=true	109.2	TRPPEPVySTVNKLC	Fyn	CSK	PEPVY*STVNK	2	607.279		10525												36.2555												1.0374
565	563	Adaptor/scaffold	Dlg2;Dlg2;Dlg2;Dlg2;Dlg2;Dlg2;Dlg2;Dlg2	PSD-93 iso2;PSD-93;PSD-93 iso2;PSD-93 iso2;PSD-93 iso2;PSD-93 iso2;PSD-93 iso2;PSD-93 iso2	473, 474;§349, §350;356, 357;288, 289;384, 385;307, 308;349, 350;384, 385	Disks large homolog 2	Q91XM9-7;Q91XM9;Q91XM9-2;Q91XM9-3;Q91XM9-4;Q91XM9-6;Q91XM9-8;Q91XM9-5	http://www.phosphosite.org/proteinAction.do?id=17674200&showAllSites=true	109.2	RPPEPVYsTVNKLCD;PPEPVYStVNKLCDK			HMLGEDDYTRPPEPVYS*T*VNKLCDKPASPR	4	908.904			20679												65.1058												1.3129
566	564	Adaptor/scaffold	Dlg2;Dlg2;Dlg2;Dlg2;Dlg2;Dlg2;Dlg2;Dlg2	PSD-93 iso2;PSD-93;PSD-93 iso2;PSD-93 iso2;PSD-93 iso2;PSD-93 iso2;PSD-93 iso2;PSD-93 iso2	473, 484;§349, §360;356, 367;288, 299;384, 395;307, 318;349, 360;384, 395	Disks large homolog 2	Q91XM9-7;Q91XM9;Q91XM9-2;Q91XM9-3;Q91XM9-4;Q91XM9-6;Q91XM9-8;Q91XM9-5	http://www.phosphosite.org/proteinAction.do?id=17674200&showAllSites=true	109.2	RPPEPVYsTVNKLCD;KLCDKPAsPRHYSPV			HM#LGEDDYTRPPEPVYS*TVNKLCDKPAS*PR	4	912.903	20836		20712	20389	20845	20490		20842		20441	20739	20268	65.1403		65.1917	64.0038	64.6157	63.5781		64.8198		63.7607	64.3518	63.972	3.8782		2.2039	4.2025	3.9461	4.0484		4.1713		3.8742
567	565	Adaptor/scaffold	Dlg2;Dlg2;Dlg2;Dlg2;Dlg2;Dlg2;Dlg2;Dlg2	PSD-93 iso2;PSD-93;PSD-93 iso2;PSD-93 iso2;PSD-93 iso2;PSD-93 iso2;PSD-93 iso2;PSD-93 iso2	473, 484;§349, §360;356, 367;288, 299;384, 395;307, 318;349, 360;384, 395	Disks large homolog 2	Q91XM9-7;Q91XM9;Q91XM9-2;Q91XM9-3;Q91XM9-4;Q91XM9-6;Q91XM9-8;Q91XM9-5	http://www.phosphosite.org/proteinAction.do?id=17674200&showAllSites=true	109.2	RPPEPVYsTVNKLCD;KLCDKPAsPRHYSPV			HM#LGEDDYTRPPEPVYS*TVNKLCDKPAS*PR	4	912.903				20893		21008						20694				65.3704		64.9515						65.1056				1.7795		3.3975
568	566	Adaptor/scaffold	Dlg2;Dlg2;Dlg2;Dlg2;Dlg2;Dlg2;Dlg2;Dlg2	PSD-93 iso2;PSD-93;PSD-93 iso2;PSD-93 iso2;PSD-93 iso2;PSD-93 iso2;PSD-93 iso2;PSD-93 iso2	473, 484;§349, §360;356, 367;288, 299;384, 395;307, 318;349, 360;384, 395	Disks large homolog 2	Q91XM9-7;Q91XM9;Q91XM9-2;Q91XM9-3;Q91XM9-4;Q91XM9-6;Q91XM9-8;Q91XM9-5	http://www.phosphosite.org/proteinAction.do?id=17674200&showAllSites=true	109.2	RPPEPVYsTVNKLCD;KLCDKPAsPRHYSPV			HM#LGEDDYTRPPEPVYS*TVNKLCDKPAS*PR	4	912.903												21407												67.026
569	567	Adaptor/scaffold	Dlg2;Dlg2;Dlg2;Dlg2;Dlg2;Dlg2;Dlg2;Dlg2	PSD-93 iso2;PSD-93;PSD-93 iso2;PSD-93 iso2;PSD-93 iso2;PSD-93 iso2;PSD-93 iso2;PSD-93 iso2	473, 484;§349, §360;356, 367;288, 299;384, 395;307, 318;349, 360;384, 395	Disks large homolog 2	Q91XM9-7;Q91XM9;Q91XM9-2;Q91XM9-3;Q91XM9-4;Q91XM9-6;Q91XM9-8;Q91XM9-5	http://www.phosphosite.org/proteinAction.do?id=17674200&showAllSites=true	109.2	RPPEPVYsTVNKLCD;KLCDKPAsPRHYSPV			HMLGEDDYTRPPEPVYS*TVNKLCDKPAS*PR	3	1211.54							21573	21822			21887	21774							67.7828	67.4701			67.447	68.0229							2.1511	1.3282
570	568	Adaptor/scaffold	Dlg2;Dlg2;Dlg2;Dlg2;Dlg2;Dlg2;Dlg2;Dlg2	PSD-93 iso2;PSD-93;PSD-93 iso2;PSD-93 iso2;PSD-93 iso2;PSD-93 iso2;PSD-93 iso2;PSD-93 iso2	473, 484;§349, §360;356, 367;288, 299;384, 395;307, 318;349, 360;384, 395	Disks large homolog 2	Q91XM9-7;Q91XM9;Q91XM9-2;Q91XM9-3;Q91XM9-4;Q91XM9-6;Q91XM9-8;Q91XM9-5	http://www.phosphosite.org/proteinAction.do?id=17674200&showAllSites=true	109.2	RPPEPVYsTVNKLCD;KLCDKPAsPRHYSPV			HMLGEDDYTRPPEPVYS*TVNKLCDKPAS*PR	3	1211.54											22119	21521											68.0653	67.3453
571	569	Adaptor/scaffold	Dlg2;Dlg2;Dlg2;Dlg2;Dlg2;Dlg2;Dlg2;Dlg2	PSD-93 iso2;PSD-93;PSD-93 iso2;PSD-93 iso2;PSD-93 iso2;PSD-93 iso2;PSD-93 iso2;PSD-93 iso2	473, 484;§349, §360;356, 367;288, 299;384, 395;307, 318;349, 360;384, 395	Disks large homolog 2	Q91XM9-7;Q91XM9;Q91XM9-2;Q91XM9-3;Q91XM9-4;Q91XM9-6;Q91XM9-8;Q91XM9-5	http://www.phosphosite.org/proteinAction.do?id=17674200&showAllSites=true	109.2	RPPEPVYsTVNKLCD;KLCDKPAsPRHYSPV			HMLGEDDYTRPPEPVYS*TVNKLCDKPAS*PR	3	1211.54											21976												67.688
572	570	Adaptor/scaffold	Dlg2;Dlg2;Dlg2;Dlg2;Dlg2;Dlg2;Dlg2;Dlg2	PSD-93 iso2;PSD-93;PSD-93 iso2;PSD-93 iso2;PSD-93 iso2;PSD-93 iso2;PSD-93 iso2;PSD-93 iso2	473, 484;§349, §360;356, 367;288, 299;384, 395;307, 318;349, 360;384, 395	Disks large homolog 2	Q91XM9-7;Q91XM9;Q91XM9-2;Q91XM9-3;Q91XM9-4;Q91XM9-6;Q91XM9-8;Q91XM9-5	http://www.phosphosite.org/proteinAction.do?id=17674200&showAllSites=true	109.2	RPPEPVYsTVNKLCD;KLCDKPAsPRHYSPV			HMLGEDDYTRPPEPVYS*TVNKLCDKPAS*PR	4	908.904	21611	21738	22023		21753		21271						67.2461	66.3744	68.7349		67.0569		66.9674						2.0726	2.4823	1.4252		3.3711		2.3729
573	571	Adaptor/scaffold	Dlg2;Dlg2;Dlg2;Dlg2;Dlg2;Dlg2;Dlg2;Dlg2	PSD-93 iso2;PSD-93;PSD-93 iso2;PSD-93 iso2;PSD-93 iso2;PSD-93 iso2;PSD-93 iso2;PSD-93 iso2	473;§349;356;288;384;307;349;384	Disks large homolog 2	Q91XM9-7;Q91XM9;Q91XM9-2;Q91XM9-3;Q91XM9-4;Q91XM9-6;Q91XM9-8;Q91XM9-5	http://www.phosphosite.org/proteinAction.do?id=17674200&showAllSites=true	109.2	RPPEPVYsTVNKLCD			HM#LGEDDYTRPPEPVYS*TVNK	3	848.709	17045	18196	17444	16973	17582		17195	17364	17540	16829	17204	17399	54.7591	56.8831	56.3938	54.838	55.8711		56.0148	55.4862	56.2438	54.0831	54.8428	56.3004	2.4824	2.9844	1.3035	2.7998	2.1067		2.5452	2.7991	2.0481	3.9664
574	572	Adaptor/scaffold	Dlg2;Dlg2;Dlg2;Dlg2;Dlg2;Dlg2;Dlg2;Dlg2	PSD-93 iso2;PSD-93;PSD-93 iso2;PSD-93 iso2;PSD-93 iso2;PSD-93 iso2;PSD-93 iso2;PSD-93 iso2	473;§349;356;288;384;307;349;384	Disks large homolog 2	Q91XM9-7;Q91XM9;Q91XM9-2;Q91XM9-3;Q91XM9-4;Q91XM9-6;Q91XM9-8;Q91XM9-5	http://www.phosphosite.org/proteinAction.do?id=17674200&showAllSites=true	109.2	RPPEPVYsTVNKLCD			HM#LGEDDYTRPPEPVYS*TVNK	3	848.709	17295				17685		17143	18013	17316	16193	18299	17895	55.4388				56.1451		55.866	57.2146	55.6387	52.3659	57.8033	57.6397	2.5937				2.0924		2.4219	2.5449	2.5486	2.3148
575	573	Adaptor/scaffold	Dlg2;Dlg2;Dlg2;Dlg2;Dlg2;Dlg2;Dlg2;Dlg2	PSD-93 iso2;PSD-93;PSD-93 iso2;PSD-93 iso2;PSD-93 iso2;PSD-93 iso2;PSD-93 iso2;PSD-93 iso2	473;§349;356;288;384;307;349;384	Disks large homolog 2	Q91XM9-7;Q91XM9;Q91XM9-2;Q91XM9-3;Q91XM9-4;Q91XM9-6;Q91XM9-8;Q91XM9-5	http://www.phosphosite.org/proteinAction.do?id=17674200&showAllSites=true	109.2	RPPEPVYsTVNKLCD			HM#LGEDDYTRPPEPVYS*TVNK	3	848.709	17554						16608	17510	17888	17896	18036	17795	56.1961						54.3959	55.8727	57.1729	56.9478	57.0933	57.3698	1.0522						3.4704	2.4105	1.1128	1.7479
576	574	Adaptor/scaffold	Dlg2;Dlg2;Dlg2;Dlg2;Dlg2;Dlg2;Dlg2;Dlg2	PSD-93 iso2;PSD-93;PSD-93 iso2;PSD-93 iso2;PSD-93 iso2;PSD-93 iso2;PSD-93 iso2;PSD-93 iso2	473;§349;356;288;384;307;349;384	Disks large homolog 2	Q91XM9-7;Q91XM9;Q91XM9-2;Q91XM9-3;Q91XM9-4;Q91XM9-6;Q91XM9-8;Q91XM9-5	http://www.phosphosite.org/proteinAction.do?id=17674200&showAllSites=true	109.2	RPPEPVYsTVNKLCD			HM#LGEDDYTRPPEPVYS*TVNK	3	848.709	17369						16004		16790	17739	17996		55.65						52.7616		54.2289	56.531	56.9867		1.7208						3.1435		3.6468	2.5017
577	575	Adaptor/scaffold	Dlg2;Dlg2;Dlg2;Dlg2;Dlg2;Dlg2;Dlg2;Dlg2	PSD-93 iso2;PSD-93;PSD-93 iso2;PSD-93 iso2;PSD-93 iso2;PSD-93 iso2;PSD-93 iso2;PSD-93 iso2	473;§349;356;288;384;307;349;384	Disks large homolog 2	Q91XM9-7;Q91XM9;Q91XM9-2;Q91XM9-3;Q91XM9-4;Q91XM9-6;Q91XM9-8;Q91XM9-5	http://www.phosphosite.org/proteinAction.do?id=17674200&showAllSites=true	109.2	RPPEPVYsTVNKLCD			HM#LGEDDYTRPPEPVYS*TVNK	3	848.709	17183						17000				18191		55.139						55.4648				57.5098		1.4864						2.7096
578	576	Adaptor/scaffold	Dlg2;Dlg2;Dlg2;Dlg2;Dlg2;Dlg2;Dlg2;Dlg2	PSD-93 iso2;PSD-93;PSD-93 iso2;PSD-93 iso2;PSD-93 iso2;PSD-93 iso2;PSD-93 iso2;PSD-93 iso2	473;§349;356;288;384;307;349;384	Disks large homolog 2	Q91XM9-7;Q91XM9;Q91XM9-2;Q91XM9-3;Q91XM9-4;Q91XM9-6;Q91XM9-8;Q91XM9-5	http://www.phosphosite.org/proteinAction.do?id=17674200&showAllSites=true	109.2	RPPEPVYsTVNKLCD			HM#LGEDDYTRPPEPVYS*TVNK	3	848.709							15959												52.6431												1.3867
579	577	Adaptor/scaffold	Dlg2;Dlg2;Dlg2;Dlg2;Dlg2;Dlg2;Dlg2;Dlg2	PSD-93 iso2;PSD-93;PSD-93 iso2;PSD-93 iso2;PSD-93 iso2;PSD-93 iso2;PSD-93 iso2;PSD-93 iso2	473;§349;356;288;384;307;349;384	Disks large homolog 2	Q91XM9-7;Q91XM9;Q91XM9-2;Q91XM9-3;Q91XM9-4;Q91XM9-6;Q91XM9-8;Q91XM9-5	http://www.phosphosite.org/proteinAction.do?id=17674200&showAllSites=true	109.2	RPPEPVYsTVNKLCD			HM#LGEDDYTRPPEPVYS*TVNK	3	848.709							17405												56.5867												1.855
580	578	Adaptor/scaffold	Dlg2;Dlg2;Dlg2;Dlg2;Dlg2;Dlg2;Dlg2;Dlg2	PSD-93 iso2;PSD-93;PSD-93 iso2;PSD-93 iso2;PSD-93 iso2;PSD-93 iso2;PSD-93 iso2;PSD-93 iso2	473;§349;356;288;384;307;349;384	Disks large homolog 2	Q91XM9-7;Q91XM9;Q91XM9-2;Q91XM9-3;Q91XM9-4;Q91XM9-6;Q91XM9-8;Q91XM9-5	http://www.phosphosite.org/proteinAction.do?id=17674200&showAllSites=true	109.2	RPPEPVYsTVNKLCD			HM#LGEDDYTRPPEPVYS*TVNK	3	848.709							17542												56.9617												1.695
581	579	Adaptor/scaffold	Dlg2;Dlg2;Dlg2;Dlg2;Dlg2;Dlg2;Dlg2;Dlg2	PSD-93 iso2;PSD-93;PSD-93 iso2;PSD-93 iso2;PSD-93 iso2;PSD-93 iso2;PSD-93 iso2;PSD-93 iso2	473;§349;356;288;384;307;349;384	Disks large homolog 2	Q91XM9-7;Q91XM9;Q91XM9-2;Q91XM9-3;Q91XM9-4;Q91XM9-6;Q91XM9-8;Q91XM9-5	http://www.phosphosite.org/proteinAction.do?id=17674200&showAllSites=true	109.2	RPPEPVYsTVNKLCD			HM#LGEDDYTRPPEPVYS*TVNKLCDKPASPR	4	892.911		20017		19601		19719					19944			61.7608		61.8946		61.5027					62.2342			4.2245		3.3648		5.081
582	580	Adaptor/scaffold	Dlg2;Dlg2;Dlg2;Dlg2;Dlg2;Dlg2;Dlg2;Dlg2	PSD-93 iso2;PSD-93;PSD-93 iso2;PSD-93 iso2;PSD-93 iso2;PSD-93 iso2;PSD-93 iso2;PSD-93 iso2	473;§349;356;288;384;307;349;384	Disks large homolog 2	Q91XM9-7;Q91XM9;Q91XM9-2;Q91XM9-3;Q91XM9-4;Q91XM9-6;Q91XM9-8;Q91XM9-5	http://www.phosphosite.org/proteinAction.do?id=17674200&showAllSites=true	109.2	RPPEPVYsTVNKLCD			HM#LGEDDYTRPPEPVYS*TVNKLCDKPASPR	5	714.531	20160			19341									63.3078			61.2013									1.5959			2.8526
583	581	Adaptor/scaffold	Dlg2;Dlg2;Dlg2;Dlg2;Dlg2;Dlg2;Dlg2;Dlg2	PSD-93 iso2;PSD-93;PSD-93 iso2;PSD-93 iso2;PSD-93 iso2;PSD-93 iso2;PSD-93 iso2;PSD-93 iso2	473;§349;356;288;384;307;349;384	Disks large homolog 2	Q91XM9-7;Q91XM9;Q91XM9-2;Q91XM9-3;Q91XM9-4;Q91XM9-6;Q91XM9-8;Q91XM9-5	http://www.phosphosite.org/proteinAction.do?id=17674200&showAllSites=true	109.2	RPPEPVYsTVNKLCD			HM#LGEDDYTRPPEPVYS*TVNKLCDKPASPR	5	714.531	20198												63.4098												1.3258
584	582	Adaptor/scaffold	Dlg2;Dlg2;Dlg2;Dlg2;Dlg2;Dlg2;Dlg2;Dlg2	PSD-93 iso2;PSD-93;PSD-93 iso2;PSD-93 iso2;PSD-93 iso2;PSD-93 iso2;PSD-93 iso2;PSD-93 iso2	473;§349;356;288;384;307;349;384	Disks large homolog 2	Q91XM9-7;Q91XM9;Q91XM9-2;Q91XM9-3;Q91XM9-4;Q91XM9-6;Q91XM9-8;Q91XM9-5	http://www.phosphosite.org/proteinAction.do?id=17674200&showAllSites=true	109.2	RPPEPVYsTVNKLCD			HMLGEDDYTRPPEPVYS*TVNK	3	843.377		18716		18286	18691				18442					58.266		58.3567	58.8419				58.6559					4.4629		2.824	1.8619				1.3079
585	583	Adaptor/scaffold	Dlg2;Dlg2;Dlg2;Dlg2;Dlg2;Dlg2;Dlg2;Dlg2	PSD-93 iso2;PSD-93;PSD-93 iso2;PSD-93 iso2;PSD-93 iso2;PSD-93 iso2;PSD-93 iso2;PSD-93 iso2	473;§349;356;288;384;307;349;384	Disks large homolog 2	Q91XM9-7;Q91XM9;Q91XM9-2;Q91XM9-3;Q91XM9-4;Q91XM9-6;Q91XM9-8;Q91XM9-5	http://www.phosphosite.org/proteinAction.do?id=17674200&showAllSites=true	109.2	RPPEPVYsTVNKLCD			HMLGEDDYTRPPEPVYS*TVNKLCDKPASPR	4	888.913	21156	21315	20564	20578	21239	21042	20733	20969	20772		21223	20863	65.9971	65.246	64.8011	64.5124	65.6903	65.0417	65.5241	65.1638	64.8821		65.6465	65.5604	2.1218	5.0123	2.4626	3.7733	4.0782	5.0853	3.4447	4.9127	3.4236
586	584	Adaptor/scaffold	Dlg2;Dlg2;Dlg2;Dlg2;Dlg2;Dlg2;Dlg2;Dlg2	PSD-93 iso2;PSD-93;PSD-93 iso2;PSD-93 iso2;PSD-93 iso2;PSD-93 iso2;PSD-93 iso2;PSD-93 iso2	473;§349;356;288;384;307;349;384	Disks large homolog 2	Q91XM9-7;Q91XM9;Q91XM9-2;Q91XM9-3;Q91XM9-4;Q91XM9-6;Q91XM9-8;Q91XM9-5	http://www.phosphosite.org/proteinAction.do?id=17674200&showAllSites=true	109.2	RPPEPVYsTVNKLCD			HMLGEDDYTRPPEPVYS*TVNKLCDKPASPR	4	888.913	21007	21206		20771			20541	20986	20999		20786	20432	65.596	64.9528		65.035			65.0011	65.2072	65.4941		64.4795	64.4081	3.4473	5.2948		4.7651			4.624	4.2263	3.0738
587	585	Adaptor/scaffold	Dlg2;Dlg2;Dlg2;Dlg2;Dlg2;Dlg2;Dlg2;Dlg2	PSD-93 iso2;PSD-93;PSD-93 iso2;PSD-93 iso2;PSD-93 iso2;PSD-93 iso2;PSD-93 iso2;PSD-93 iso2	473;§349;356;288;384;307;349;384	Disks large homolog 2	Q91XM9-7;Q91XM9;Q91XM9-2;Q91XM9-3;Q91XM9-4;Q91XM9-6;Q91XM9-8;Q91XM9-5	http://www.phosphosite.org/proteinAction.do?id=17674200&showAllSites=true	109.2	RPPEPVYsTVNKLCD			HMLGEDDYTRPPEPVYS*TVNKLCDKPASPR	4	888.913	20791			20916							20989	20844	65.0214			65.4371							65.0164	65.5104	2.1691			2.7251
588	586	Adaptor/scaffold	Dlg2;Dlg2;Dlg2;Dlg2;Dlg2;Dlg2;Dlg2;Dlg2	PSD-93 iso2;PSD-93;PSD-93 iso2;PSD-93 iso2;PSD-93 iso2;PSD-93 iso2;PSD-93 iso2;PSD-93 iso2	473;§349;356;288;384;307;349;384	Disks large homolog 2	Q91XM9-7;Q91XM9;Q91XM9-2;Q91XM9-3;Q91XM9-4;Q91XM9-6;Q91XM9-8;Q91XM9-5	http://www.phosphosite.org/proteinAction.do?id=17674200&showAllSites=true	109.2	RPPEPVYsTVNKLCD			HMLGEDDYTRPPEPVYS*TVNKLCDKPASPR	4	888.913												20402												64.3297
589	587	Adaptor/scaffold	Dlg2;Dlg2;Dlg2;Dlg2;Dlg2;Dlg2;Dlg2;Dlg2	PSD-93 iso2;PSD-93;PSD-93 iso2;PSD-93 iso2;PSD-93 iso2;PSD-93 iso2;PSD-93 iso2;PSD-93 iso2	473;§349;356;288;384;307;349;384	Disks large homolog 2	Q91XM9-7;Q91XM9;Q91XM9-2;Q91XM9-3;Q91XM9-4;Q91XM9-6;Q91XM9-8;Q91XM9-5	http://www.phosphosite.org/proteinAction.do?id=17674200&showAllSites=true	109.2	RPPEPVYsTVNKLCD			HMLGEDDYTRPPEPVYS*TVNKLCDKPASPR	4	888.913												20641												64.9646
590	588	Adaptor/scaffold	Dlg2;Dlg2;Dlg2;Dlg2;Dlg2;Dlg2;Dlg2;Dlg2	PSD-93 iso2;PSD-93;PSD-93 iso2;PSD-93 iso2;PSD-93 iso2;PSD-93 iso2;PSD-93 iso2;PSD-93 iso2	474, 484;§350, §360;357, 367;289, 299;385, 395;308, 318;350, 360;385, 395	Disks large homolog 2	Q91XM9-7;Q91XM9;Q91XM9-2;Q91XM9-3;Q91XM9-4;Q91XM9-6;Q91XM9-8;Q91XM9-5	http://www.phosphosite.org/proteinAction.do?id=17674200&showAllSites=true	109.2	PPEPVYStVNKLCDK;KLCDKPAsPRHYSPV			HM#LGEDDYTRPPEPVYST*VNKLCDKPAS*PR	4	912.903	21039	20659	20258				20100	20588	20588	20923	21432	21412	65.6819	63.4746	63.98				63.8346	64.1443	64.3958	65.0529	66.2254	67.0416	2.26	2.2801	2.1767				1.9152	4.3613	5.0274	3.3367
591	589	Adaptor/scaffold	Dlg2;Dlg2;Dlg2;Dlg2;Dlg2;Dlg2;Dlg2;Dlg2	PSD-93 iso2;PSD-93;PSD-93 iso2;PSD-93 iso2;PSD-93 iso2;PSD-93 iso2;PSD-93 iso2;PSD-93 iso2	474, 484;§350, §360;357, 367;289, 299;385, 395;308, 318;350, 360;385, 395	Disks large homolog 2	Q91XM9-7;Q91XM9;Q91XM9-2;Q91XM9-3;Q91XM9-4;Q91XM9-6;Q91XM9-8;Q91XM9-5	http://www.phosphosite.org/proteinAction.do?id=17674200&showAllSites=true	109.2	PPEPVYStVNKLCDK;KLCDKPAsPRHYSPV			HM#LGEDDYTRPPEPVYST*VNKLCDKPAS*PR	4	912.903	20636	21500							20878		21165		64.6018	65.7416							65.1694		65.4879		3.4046	2.6992							1.8609
592	590	Adaptor/scaffold	Dlg2;Dlg2;Dlg2;Dlg2;Dlg2;Dlg2;Dlg2;Dlg2	PSD-93 iso2;PSD-93;PSD-93 iso2;PSD-93 iso2;PSD-93 iso2;PSD-93 iso2;PSD-93 iso2;PSD-93 iso2	474, 484;§350, §360;357, 367;289, 299;385, 395;308, 318;350, 360;385, 395	Disks large homolog 2	Q91XM9-7;Q91XM9;Q91XM9-2;Q91XM9-3;Q91XM9-4;Q91XM9-6;Q91XM9-8;Q91XM9-5	http://www.phosphosite.org/proteinAction.do?id=17674200&showAllSites=true	109.2	PPEPVYStVNKLCDK;KLCDKPAsPRHYSPV			HMLGEDDYTRPPEPVYST*VNKLCDKPAS*PR	3	1211.54												21591												67.5342
593	591	Adaptor/scaffold	Dlg2;Dlg2;Dlg2;Dlg2;Dlg2;Dlg2;Dlg2;Dlg2	PSD-93 iso2;PSD-93;PSD-93 iso2;PSD-93 iso2;PSD-93 iso2;PSD-93 iso2;PSD-93 iso2;PSD-93 iso2	474, 484;§350, §360;357, 367;289, 299;385, 395;308, 318;350, 360;385, 395	Disks large homolog 2	Q91XM9-7;Q91XM9;Q91XM9-2;Q91XM9-3;Q91XM9-4;Q91XM9-6;Q91XM9-8;Q91XM9-5	http://www.phosphosite.org/proteinAction.do?id=17674200&showAllSites=true	109.2	PPEPVYStVNKLCDK;KLCDKPAsPRHYSPV			HMLGEDDYTRPPEPVYST*VNKLCDKPAS*PR	4	908.904	22398	22144			22379			22141	21537	21583			69.381	67.4574			68.7344			68.3238	66.9456	66.837			1.4687	4.6745			2.564			3.6936	2.2496	2.9617
594	592	Adaptor/scaffold	Dlg2;Dlg2;Dlg2;Dlg2;Dlg2;Dlg2;Dlg2;Dlg2	PSD-93 iso2;PSD-93;PSD-93 iso2;PSD-93 iso2;PSD-93 iso2;PSD-93 iso2;PSD-93 iso2;PSD-93 iso2	474, 484;§350, §360;357, 367;289, 299;385, 395;308, 318;350, 360;385, 395	Disks large homolog 2	Q91XM9-7;Q91XM9;Q91XM9-2;Q91XM9-3;Q91XM9-4;Q91XM9-6;Q91XM9-8;Q91XM9-5	http://www.phosphosite.org/proteinAction.do?id=17674200&showAllSites=true	109.2	PPEPVYStVNKLCDK;KLCDKPAsPRHYSPV			HMLGEDDYTRPPEPVYST*VNKLCDKPAS*PR	4	908.904					21954			21549	21668								67.5942			66.7398	67.311								3.9225			3.2951	4.7108
595	593	Adaptor/scaffold	Dlg2;Dlg2;Dlg2;Dlg2;Dlg2;Dlg2;Dlg2;Dlg2	PSD-93 iso2;PSD-93;PSD-93 iso2;PSD-93 iso2;PSD-93 iso2;PSD-93 iso2;PSD-93 iso2;PSD-93 iso2	474, 484;§350, §360;357, 367;289, 299;385, 395;308, 318;350, 360;385, 395	Disks large homolog 2	Q91XM9-7;Q91XM9;Q91XM9-2;Q91XM9-3;Q91XM9-4;Q91XM9-6;Q91XM9-8;Q91XM9-5	http://www.phosphosite.org/proteinAction.do?id=17674200&showAllSites=true	109.2	PPEPVYStVNKLCDK;KLCDKPAsPRHYSPV			HMLGEDDYTRPPEPVYST*VNKLCDKPAS*PR	5	727.325			21657												67.7412												1.3371
596	594	Adaptor/scaffold	Dlg2;Dlg2;Dlg2;Dlg2;Dlg2;Dlg2;Dlg2;Dlg2	PSD-93 iso2;PSD-93;PSD-93 iso2;PSD-93 iso2;PSD-93 iso2;PSD-93 iso2;PSD-93 iso2;PSD-93 iso2	474;§350;357;289;385;308;350;385	Disks large homolog 2	Q91XM9-7;Q91XM9;Q91XM9-2;Q91XM9-3;Q91XM9-4;Q91XM9-6;Q91XM9-8;Q91XM9-5	http://www.phosphosite.org/proteinAction.do?id=17674200&showAllSites=true	109.2	PPEPVYStVNKLCDK			HM#LGEDDYTRPPEPVYST*VNK	3	848.709	16989	18226	16814	17610	18043		17791	17571	17202	17531		17597	54.6029	56.9615	54.6741	56.5448	57.1095		57.6294	56.0337	55.3272	55.9698		56.8338	3.3883	2.3975	3.0264	2.3302	1.5321		1.4542	2.4874	2.3096	2.1937
597	595	Adaptor/scaffold	Dlg2;Dlg2;Dlg2;Dlg2;Dlg2;Dlg2;Dlg2;Dlg2	PSD-93 iso2;PSD-93;PSD-93 iso2;PSD-93 iso2;PSD-93 iso2;PSD-93 iso2;PSD-93 iso2;PSD-93 iso2	474;§350;357;289;385;308;350;385	Disks large homolog 2	Q91XM9-7;Q91XM9;Q91XM9-2;Q91XM9-3;Q91XM9-4;Q91XM9-6;Q91XM9-8;Q91XM9-5	http://www.phosphosite.org/proteinAction.do?id=17674200&showAllSites=true	109.2	PPEPVYStVNKLCDK			HM#LGEDDYTRPPEPVYST*VNK	3	848.709							16807		17647	17027		17191							54.9298		56.5299	54.6169		55.7471							3.0347		2.1112	2.792
598	596	Adaptor/scaffold	Dlg2;Dlg2;Dlg2;Dlg2;Dlg2;Dlg2;Dlg2;Dlg2	PSD-93 iso2;PSD-93;PSD-93 iso2;PSD-93 iso2;PSD-93 iso2;PSD-93 iso2;PSD-93 iso2;PSD-93 iso2	474;§350;357;289;385;308;350;385	Disks large homolog 2	Q91XM9-7;Q91XM9;Q91XM9-2;Q91XM9-3;Q91XM9-4;Q91XM9-6;Q91XM9-8;Q91XM9-5	http://www.phosphosite.org/proteinAction.do?id=17674200&showAllSites=true	109.2	PPEPVYStVNKLCDK			HM#LGEDDYTRPPEPVYST*VNK	3	848.709									17412												55.8997												2.1176
599	597	Adaptor/scaffold	Dlg2;Dlg2;Dlg2;Dlg2;Dlg2;Dlg2;Dlg2;Dlg2	PSD-93 iso2;PSD-93;PSD-93 iso2;PSD-93 iso2;PSD-93 iso2;PSD-93 iso2;PSD-93 iso2;PSD-93 iso2	474;§350;357;289;385;308;350;385	Disks large homolog 2	Q91XM9-7;Q91XM9;Q91XM9-2;Q91XM9-3;Q91XM9-4;Q91XM9-6;Q91XM9-8;Q91XM9-5	http://www.phosphosite.org/proteinAction.do?id=17674200&showAllSites=true	109.2	PPEPVYStVNKLCDK			HM#LGEDDYTRPPEPVYST*VNK	4	636.783			16226												53.0647												2.1507
600	598	Adaptor/scaffold	Dlg2;Dlg2;Dlg2;Dlg2;Dlg2;Dlg2;Dlg2;Dlg2	PSD-93 iso2;PSD-93;PSD-93 iso2;PSD-93 iso2;PSD-93 iso2;PSD-93 iso2;PSD-93 iso2;PSD-93 iso2	474;§350;357;289;385;308;350;385	Disks large homolog 2	Q91XM9-7;Q91XM9;Q91XM9-2;Q91XM9-3;Q91XM9-4;Q91XM9-6;Q91XM9-8;Q91XM9-5	http://www.phosphosite.org/proteinAction.do?id=17674200&showAllSites=true	109.2	PPEPVYStVNKLCDK			HM#LGEDDYTRPPEPVYST*VNKLCDKPASPR	4	892.911	19801	20105	19705	19369	19877		19527	19791	19624	19671	19748	19439	62.3454	61.9955	62.5005	61.2759	62.0309		62.3092	62.0071	61.8318	61.7106	61.7076	61.7725	1.5095	4.0262	2.1577	2.4323	3.024		2.7586	5.0063	1.9145	4.3871
601	599	Adaptor/scaffold	Dlg2;Dlg2;Dlg2;Dlg2;Dlg2;Dlg2;Dlg2;Dlg2	PSD-93 iso2;PSD-93;PSD-93 iso2;PSD-93 iso2;PSD-93 iso2;PSD-93 iso2;PSD-93 iso2;PSD-93 iso2	474;§350;357;289;385;308;350;385	Disks large homolog 2	Q91XM9-7;Q91XM9;Q91XM9-2;Q91XM9-3;Q91XM9-4;Q91XM9-6;Q91XM9-8;Q91XM9-5	http://www.phosphosite.org/proteinAction.do?id=17674200&showAllSites=true	109.2	PPEPVYStVNKLCDK			HM#LGEDDYTRPPEPVYST*VNKLCDKPASPR	4	892.911	19786	19888	19513						19788	19787		19582	62.3051	61.4189	61.974						62.2658	62.0163		62.1521	2.0243	4.1726	1.6483						2.6988	4.1648
602	600	Adaptor/scaffold	Dlg2;Dlg2;Dlg2;Dlg2;Dlg2;Dlg2;Dlg2;Dlg2	PSD-93 iso2;PSD-93;PSD-93 iso2;PSD-93 iso2;PSD-93 iso2;PSD-93 iso2;PSD-93 iso2;PSD-93 iso2	474;§350;357;289;385;308;350;385	Disks large homolog 2	Q91XM9-7;Q91XM9;Q91XM9-2;Q91XM9-3;Q91XM9-4;Q91XM9-6;Q91XM9-8;Q91XM9-5	http://www.phosphosite.org/proteinAction.do?id=17674200&showAllSites=true	109.2	PPEPVYStVNKLCDK			HM#LGEDDYTRPPEPVYST*VNKLCDKPASPR	4	892.911			19655												62.3637												2.6699
603	601	Adaptor/scaffold	Dlg2;Dlg2;Dlg2;Dlg2;Dlg2;Dlg2;Dlg2;Dlg2	PSD-93 iso2;PSD-93;PSD-93 iso2;PSD-93 iso2;PSD-93 iso2;PSD-93 iso2;PSD-93 iso2;PSD-93 iso2	474;§350;357;289;385;308;350;385	Disks large homolog 2	Q91XM9-7;Q91XM9;Q91XM9-2;Q91XM9-3;Q91XM9-4;Q91XM9-6;Q91XM9-8;Q91XM9-5	http://www.phosphosite.org/proteinAction.do?id=17674200&showAllSites=true	109.2	PPEPVYStVNKLCDK			HMLGEDDYTRPPEPVYST*VNK	2	1264.56												17904												57.6634
604	602	Adaptor/scaffold	Dlg2;Dlg2;Dlg2;Dlg2;Dlg2;Dlg2;Dlg2;Dlg2	PSD-93 iso2;PSD-93;PSD-93 iso2;PSD-93 iso2;PSD-93 iso2;PSD-93 iso2;PSD-93 iso2;PSD-93 iso2	474;§350;357;289;385;308;350;385	Disks large homolog 2	Q91XM9-7;Q91XM9;Q91XM9-2;Q91XM9-3;Q91XM9-4;Q91XM9-6;Q91XM9-8;Q91XM9-5	http://www.phosphosite.org/proteinAction.do?id=17674200&showAllSites=true	109.2	PPEPVYStVNKLCDK			HMLGEDDYTRPPEPVYST*VNK	3	843.377	18605				41207	18523			18352		18816	18438	59.0489				120.323	58.3135			58.4186		59.1848	59.0929	2.8808				4.0153	3.2002			1.8408
605	603	Adaptor/scaffold	Dlg2;Dlg2;Dlg2;Dlg2;Dlg2;Dlg2;Dlg2;Dlg2	PSD-93 iso2;PSD-93;PSD-93 iso2;PSD-93 iso2;PSD-93 iso2;PSD-93 iso2;PSD-93 iso2;PSD-93 iso2	474;§350;357;289;385;308;350;385	Disks large homolog 2	Q91XM9-7;Q91XM9;Q91XM9-2;Q91XM9-3;Q91XM9-4;Q91XM9-6;Q91XM9-8;Q91XM9-5	http://www.phosphosite.org/proteinAction.do?id=17674200&showAllSites=true	109.2	PPEPVYStVNKLCDK			HMLGEDDYTRPPEPVYST*VNK	3	843.377	18787												59.5528												1.4359
606	604	Adaptor/scaffold	Dlg2;Dlg2;Dlg2;Dlg2;Dlg2;Dlg2;Dlg2;Dlg2	PSD-93 iso2;PSD-93;PSD-93 iso2;PSD-93 iso2;PSD-93 iso2;PSD-93 iso2;PSD-93 iso2;PSD-93 iso2	474;§350;357;289;385;308;350;385	Disks large homolog 2	Q91XM9-7;Q91XM9;Q91XM9-2;Q91XM9-3;Q91XM9-4;Q91XM9-6;Q91XM9-8;Q91XM9-5	http://www.phosphosite.org/proteinAction.do?id=17674200&showAllSites=true	109.2	PPEPVYStVNKLCDK			HMLGEDDYTRPPEPVYST*VNK	3	843.377	18583												58.9877												2.7825
607	605	Adaptor/scaffold	Dlg2;Dlg2;Dlg2;Dlg2;Dlg2;Dlg2;Dlg2;Dlg2	PSD-93 iso2;PSD-93;PSD-93 iso2;PSD-93 iso2;PSD-93 iso2;PSD-93 iso2;PSD-93 iso2;PSD-93 iso2	474;§350;357;289;385;308;350;385	Disks large homolog 2	Q91XM9-7;Q91XM9;Q91XM9-2;Q91XM9-3;Q91XM9-4;Q91XM9-6;Q91XM9-8;Q91XM9-5	http://www.phosphosite.org/proteinAction.do?id=17674200&showAllSites=true	109.2	PPEPVYStVNKLCDK			HMLGEDDYTRPPEPVYST*VNKLCDKPASPR	5	711.332			20989												65.9325												1.3794
608	606	Adaptor/scaffold	Dlg2;Dlg2;Dlg2;Dlg2;Dlg2;Dlg2;Dlg2;Dlg2	PSD-93 iso2;PSD-93;PSD-93 iso2;PSD-93 iso2;PSD-93 iso2;PSD-93 iso2;PSD-93 iso2;PSD-93 iso2	484, 488, 489;§360, §364, §365;367, 371, 372;299, 303, 304;395, 399, 400;318, 322, 323;360, 364, 365;395, 399, 400	Disks large homolog 2	Q91XM9-7;Q91XM9;Q91XM9-2;Q91XM9-3;Q91XM9-4;Q91XM9-6;Q91XM9-8;Q91XM9-5	http://www.phosphosite.org/proteinAction.do?id=17674200&showAllSites=true	109.2	KLCDKPAsPRHYSPV;KPASPRHySPVECDK;PASPRHYsPVECDKS			LCDKPAS*PRHY*S*PVECDK	3	800.305	8883	9092	8484	8566	8793	8762		8693	8566	8688	8876	8363	32.3658	32.3871	32.0032	32.1338	32.2642	32.1969		32.1553	32.0001	32.0978	32.2958	31.9349	1.0113	1.3216	1.4763	1.7802	1.9417	2.3715		1.921	1.8051	2.1273
609	607	Adaptor/scaffold	Dlg2;Dlg2;Dlg2;Dlg2;Dlg2;Dlg2;Dlg2;Dlg2	PSD-93 iso2;PSD-93;PSD-93 iso2;PSD-93 iso2;PSD-93 iso2;PSD-93 iso2;PSD-93 iso2;PSD-93 iso2	488;§364;371;303;399;322;364;399	Disks large homolog 2	Q91XM9-7;Q91XM9;Q91XM9-2;Q91XM9-3;Q91XM9-4;Q91XM9-6;Q91XM9-8;Q91XM9-5	http://www.phosphosite.org/proteinAction.do?id=17674200&showAllSites=true	109.2	KPASPRHySPVECDK			HY*SPVECDK	2	607.731									5483												23.5485												1.2641
610	608	Adaptor/scaffold	Dlg3	DLG3	§324	Disks large homolog 3	P70175	http://www.phosphosite.org/proteinAction.do?id=5269&showAllSites=true	93.4	KNTSDMVyLKVAKPG			NTSDM#VY*LK	2	583.744		14045	13459	13465			13412		13536					45.6972	45.5019	45.3226			45.7278		45.3815					1.5011	1.2885	1.7918			1.8613		2.1328
611	609	Adaptor/scaffold	Dlg3	DLG3	§324	Disks large homolog 3	P70175	http://www.phosphosite.org/proteinAction.do?id=5269&showAllSites=true	93.4	KNTSDMVyLKVAKPG			NTSDMVY*LK	2	575.746	18620	18818		18362	18702	18629	18225	18558	18475	18530	18636	18255	59.0955	58.5416		58.5595	58.8703	58.5975	58.7983	58.6755	58.7434	58.6458	58.7037	58.605	2.0823	2.9446		2.9644	2.5993	2.7577	2.7945	2.1707	2.85	2.2846
612	610	Adaptor/scaffold	Dlg3	DLG3	§385	Disks large homolog 3	P70175	http://www.phosphosite.org/proteinAction.do?id=5269&showAllSites=true	93.4	PQVPPTRySPIPRHM			Y*SPIPR	2	406.689											11410	10999											39.1413	39.0505
613	611	Adaptor/scaffold	Dlg3	DLG3	§705	Disks large homolog 3	P70175	http://www.phosphosite.org/proteinAction.do?id=5269&showAllSites=true	93.4	NEVDGQDyHFVVSRE			RDNEVDGQDY*HFVVSR	3	672.625	14746	14749	14380	14302			14232	14472	14459	14502	14662	14230	48.3524	47.5787	47.9794	47.5603			47.9236	47.6517	47.8544	47.7187	47.895	47.7093	1.2191	3.8521	2.9984	4.1479			3.84	4.4335	4.7918	4.5706
614	612	Adaptor/scaffold	Dlg3	DLG3	§705	Disks large homolog 3	P70175	http://www.phosphosite.org/proteinAction.do?id=5269&showAllSites=true	93.4	NEVDGQDyHFVVSRE			RDNEVDGQDY*HFVVSR	3	672.625											14653												47.8671
615	613	Adaptor/scaffold	Dlg3	DLG3	14	Disks large homolog 3	P70175	http://www.phosphosite.org/proteinAction.do?id=5269&showAllSites=true	93.4	CCKCPECyEVTRLAA			CPECY*EVTR	2	647.236			9616	9632	9845	9812	9447	9729	9710	9763	9948	9497			35.0688	34.9976	35.0945	35.0269	35.0538	34.9376	35.082	34.9809	35.1924	35.0018			2.3643	2.7498	2.4185	2.2485	2.7477	2.7106	2.5074	2.7232
616	614	Adaptor/scaffold	Dlg3	DLG3	274	Disks large homolog 3	P70175	http://www.phosphosite.org/proteinAction.do?id=5269&showAllSites=true	93.4	IPGDNSIyITKIIEG			GLGFSIAGGIGNQHIPGDNSIY*ITK	3	870.43							28294												85.8175												1.7811
617	615	Adaptor/scaffold	Dlg3	DLG3	276	Disks large homolog 3	P70175	http://www.phosphosite.org/proteinAction.do?id=5269&showAllSites=true	93.4	GDNSIYItKIIEGGA			GLGFSIAGGIGNQHIPGDNSIYIT*K	3	870.43									28556												85.7643												2.039
618	616	Adaptor/scaffold	Dlg3	DLG3	30	Disks large homolog 3	P70175	http://www.phosphosite.org/proteinAction.do?id=5269&showAllSites=true	93.4	RRLEPPGyGDWQVPD			RLEPPGY*GDWQVPDPYGPSGGNGASSGYGGYSSQTLPSQAGATPTPR	4	1205.04		26212												78.3361												5.146
619	617	Adaptor/scaffold	Dlg3	DLG3	339	Disks large homolog 3	P70175	http://www.phosphosite.org/proteinAction.do?id=5269&showAllSites=true	93.4	SIHLNDMyAPPDYAS			VAKPGSIHLNDM#Y*APPDYASTFTALADNHISHNSSLGYLGAVESK	5	971.86					27701												83.0239												3.6881
620	618	Adaptor/scaffold	Dlg3	DLG3	339	Disks large homolog 3	P70175	http://www.phosphosite.org/proteinAction.do?id=5269&showAllSites=true	93.4	SIHLNDMyAPPDYAS			VAKPGSIHLNDMY*APPDYASTFTALADNHISHNSSLGYLGAVESK	4	1210.57											28730												85.8401
621	619	Adaptor/scaffold	Dlg3	DLG3	339	Disks large homolog 3	P70175	http://www.phosphosite.org/proteinAction.do?id=5269&showAllSites=true	93.4	SIHLNDMyAPPDYAS			VAKPGSIHLNDMY*APPDYASTFTALADNHISHNSSLGYLGAVESK	5	968.661	28675	28893		28449			28361	28648		28644		28370	86.3909	85.5268		85.6744			85.9961	85.7493		85.7372		85.7183	5.5409	9.1673		4.4739			6.848	5.6041		7.8549
622	620	Adaptor/scaffold	Dlg3	DLG3	344	Disks large homolog 3	P70175	http://www.phosphosite.org/proteinAction.do?id=5269&showAllSites=true	93.4	DMYAPPDyASTFTAL			VAKPGSIHLNDM#YAPPDY*ASTFTALADNHISHNSSLGYLGAVESK	5	971.86				25828		26145	25743	26034	25994	26086						78.6255		78.6727	78.9894	78.7239	78.8839	78.8799						3.6958		4.9023	6.5041	7.0667	6.7077	3.5419
623	621	Adaptor/scaffold	Dlg3	DLG3	344	Disks large homolog 3	P70175	http://www.phosphosite.org/proteinAction.do?id=5269&showAllSites=true	93.4	DMYAPPDyASTFTAL			VAKPGSIHLNDM#YAPPDY*ASTFTALADNHISHNSSLGYLGAVESK	5	971.86								26068		26054										78.8118		78.7969										2.2479		7.9439
624	622	Adaptor/scaffold	Dlg3	DLG3	344	Disks large homolog 3	P70175	http://www.phosphosite.org/proteinAction.do?id=5269&showAllSites=true	93.4	DMYAPPDyASTFTAL			VAKPGSIHLNDMYAPPDY*ASTFTALADNHISHNSSLGYLGAVESK	5	968.661		27469	27067		27435	27352				27253	27348	26974		81.708	82.3745		82.317	81.9085				82.0257	82.1042	81.9307		9.3157	6.6947		7.9964	7.7958				5.5246
625	623	Adaptor/scaffold	Dlg3	DLG3	344	Disks large homolog 3	P70175	http://www.phosphosite.org/proteinAction.do?id=5269&showAllSites=true	93.4	DMYAPPDyASTFTAL			VAKPGSIHLNDMYAPPDY*ASTFTALADNHISHNSSLGYLGAVESK	5	968.661						27337												81.8686												8.3304
626	624	Adaptor/scaffold	Dlg3	DLG3	39	Disks large homolog 3	P70175	http://www.phosphosite.org/proteinAction.do?id=5269&showAllSites=true	93.4	DWQVPDPyGPSGGNG			RLEPPGYGDWQVPDPY*GPSGGNGASSGYGGYSSQTLPSQAGATPTPR	4	1205.04			26065		26436				24971		25120				79.6574		79.5988				76.1473		76.1352				3.3662		5.3044				3.349
627	625	Adaptor/scaffold	Dlg3	DLG3	39	Disks large homolog 3	P70175	http://www.phosphosite.org/proteinAction.do?id=5269&showAllSites=true	93.4	DWQVPDPyGPSGGNG			RLEPPGYGDWQVPDPY*GPSGGNGASSGYGGYSSQTLPSQAGATPTPR	4	1205.04											26306												79.2981
628	626	Adaptor/scaffold	Dlg3	DLG3	49	Disks large homolog 3	P70175	http://www.phosphosite.org/proteinAction.do?id=5269&showAllSites=true	93.4	SGGNGASsGYGGYSS			RLEPPGYGDWQVPDPYGPSGGNGASS*GYGGYSSQTLPSQAGATPTPR	4	1205.04	26232	26592							24981	26352			79.7456	79.356							76.1733	79.5884			3.9641	5.8395							3.6604	5.274
629	627	Adaptor/scaffold	Dlg3	DLG3	618	Disks large homolog 3	P70175	http://www.phosphosite.org/proteinAction.do?id=5269&showAllSites=true	93.4	FPGLSDDyYGAKNLK			TGM#IESNRDFPGLSDDY*YGAK	3	811.342		21063		20633			20471	20772	20736	20837				64.5736		64.6617			64.8183	64.6304	64.7873	64.8223				4.6322		3.1037			3.7337	4.2154	4.3334	4.1357
630	628	Adaptor/scaffold	Dlg3	DLG3	618	Disks large homolog 3	P70175	http://www.phosphosite.org/proteinAction.do?id=5269&showAllSites=true	93.4	FPGLSDDyYGAKNLK			TGM#IESNRDFPGLSDDY*YGAK	3	811.342										20780												64.667												4.4561
631	629	Adaptor/scaffold	Dlg3	DLG3	618	Disks large homolog 3	P70175	http://www.phosphosite.org/proteinAction.do?id=5269&showAllSites=true	93.4	FPGLSDDyYGAKNLK			TGMIESNRDFPGLSDDY*YGAK	3	806.01	23081	23305	22888	22867	23221	23149	22745	23038	22973	23039	23152	22764	71.2273	70.5675	71.0784	70.6845	71.0015	70.6702	70.9259	70.719	70.8074	70.7318	70.8634	70.678	4.1991	6.7743	4.7065	6.4673	6.223	7.1629	6.1671	6.4261	6.1926	6.624
632	630	Adaptor/scaffold	Dlg3	DLG3	618	Disks large homolog 3	P70175	http://www.phosphosite.org/proteinAction.do?id=5269&showAllSites=true	93.4	FPGLSDDyYGAKNLK			TGMIESNRDFPGLSDDY*YGAK	3	806.01			22879												71.0548												4.7781
633	631	Adaptor/scaffold	Dlg3	DLG3	619	Disks large homolog 3	P70175	http://www.phosphosite.org/proteinAction.do?id=5269&showAllSites=true	93.4	PGLSDDYyGAKNLKG			TGM#IESNRDFPGLSDDYY*GAK	3	811.342	20565	20801	20640	20342			20492					20535	64.414	63.8541	65.0036	63.8802			64.8728					64.682	1.2576	5.0064	1.9476	2.865			2.9337
634	632	Adaptor/scaffold	Dlg3	DLG3	619	Disks large homolog 3	P70175	http://www.phosphosite.org/proteinAction.do?id=5269&showAllSites=true	93.4	PGLSDDYyGAKNLKG			TGMIESNRDFPGLSDDYY*GAK	3	806.01		23084				22944	22807				22921			69.9716				70.1224	71.089				70.2451			6.2461				3.7637	2.0308
635	633	Adaptor/scaffold	Dlg3	DLG3	840	Disks large homolog 3	P70175	http://www.phosphosite.org/proteinAction.do?id=5269&showAllSites=true	93.4	IEDQSGHyIWVPSPE			QIIEDQSGHY*IWVPSPEKL	3	773.707				27710	28125		27640	27905	27890	27928						83.6997	84.1544		84.0758	83.762	83.9867	83.8332						2.2858	2.0099		2.8217	3.0325	3.3318	3.5746
636	634	Adaptor/scaffold	Dlg3	DLG3	840	Disks large homolog 3	P70175	http://www.phosphosite.org/proteinAction.do?id=5269&showAllSites=true	93.4	IEDQSGHyIWVPSPE			QIIEDQSGHY*IWVPSPEKL	3	773.707				27699				27881								83.6714				83.6981								3.1681				3.0923
637	635	Adaptor/scaffold	Dlg4;Dlg4;Dlg4	PSD-95;PSD-95 iso 2;PSD-95 iso 3	§236;279;233	Disks large homolog 4	Q62108;Q62108-2;Q62108-3	http://www.phosphosite.org/proteinAction.do?id=7101&showAllSites=true	80.4	VAALKNTyDVVYLKV			ILAVNSVGLEDVMHEDAVAALKNTY*DVVYLK	3	1157.25						36243	35793			36143	36187	35847						105.669	105.995			105.837	105.892	105.798						4.9947	4.1901			5.2748
638	636	Adaptor/scaffold	Dlg4;Dlg4;Dlg4	PSD-95;PSD-95 iso 2;PSD-95 iso 3	§236;279;233	Disks large homolog 4	Q62108;Q62108-2;Q62108-3	http://www.phosphosite.org/proteinAction.do?id=7101&showAllSites=true	80.4	VAALKNTyDVVYLKV			ILAVNSVGLEDVMHEDAVAALKNTY*DVVYLK	4	868.189	35950	36380	35819	35892	36316	36262	35798		36048	36137	36182	35839	106.22	105.627	106.08	105.638	106.057	105.721	106.01		105.922	105.82	105.88	105.777	3.796	6.125	4.4979	5.7115	5.0951	4.3176	5.3175		7.2007	6.5327
639	637	Adaptor/scaffold	Dlg4;Dlg4;Dlg4	PSD-95;PSD-95 iso 2;PSD-95 iso 3	§236;279;233	Disks large homolog 4	Q62108;Q62108-2;Q62108-3	http://www.phosphosite.org/proteinAction.do?id=7101&showAllSites=true	80.4	VAALKNTyDVVYLKV			LQIGDKILAVNSVGLEDVMHEDAVAALKNTY*DVVYLK	4	1031.78		36364	35793	35882		36229	35769	36078	36021	36125		35818		105.586	106.01	105.614		105.634	105.933	105.675	105.848	105.789		105.721		7.6448	3.5924	6.9933		9.0118	8.0891	7.1327	9.2617	6.4743
640	638	Adaptor/scaffold	Dlg4;Dlg4;Dlg4	PSD-95;PSD-95 iso 2;PSD-95 iso 3	§236;279;233	Disks large homolog 4	Q62108;Q62108-2;Q62108-3	http://www.phosphosite.org/proteinAction.do?id=7101&showAllSites=true	80.4	VAALKNTyDVVYLKV			LQIGDKILAVNSVGLEDVMHEDAVAALKNTY*DVVYLK	4	1031.78								36096				35827								105.723				105.745								6.1806
641	639	Adaptor/scaffold	Dlg4;Dlg4;Dlg4	PSD-95;PSD-95 iso 2;PSD-95 iso 3	§236;279;233	Disks large homolog 4	Q62108;Q62108-2;Q62108-3	http://www.phosphosite.org/proteinAction.do?id=7101&showAllSites=true	80.4	VAALKNTyDVVYLKV			NTY*DVVYLK	2	597.776								20371	20306	20356		20117								63.5592	63.6439	63.5327		63.5682								1.8626	1.5392	2.3667
642	640	Adaptor/scaffold	Dlg4;Dlg4;Dlg4	PSD-95;PSD-95 iso 2;PSD-95 iso 3	§240;283;237	Disks large homolog 4	Q62108;Q62108-2;Q62108-3	http://www.phosphosite.org/proteinAction.do?id=7101&showAllSites=true	80.4	KNTYDVVyLKVAKPS			ILAVNSVGLEDVM#HEDAVAALKNTYDVVY*LK	3	1162.58	31368	31628	31150	31136	31556	31476	31106	31366	31315	31442	31499	31123	93.731	92.8532	93.4161	92.8729	93.3534	92.9201	93.3936	93.0249	93.1786	93.2368	93.3076	93.0923	2.5396	6.1235	5.7205	6.4255	5.8422	6.6798	3.1399	7.2284	6.612	3.7103
643	641	Adaptor/scaffold	Dlg4;Dlg4;Dlg4	PSD-95;PSD-95 iso 2;PSD-95 iso 3	§240;283;237	Disks large homolog 4	Q62108;Q62108-2;Q62108-3	http://www.phosphosite.org/proteinAction.do?id=7101&showAllSites=true	80.4	KNTYDVVyLKVAKPS			ILAVNSVGLEDVM#HEDAVAALKNTYDVVY*LK	3	1162.58	31383	31660		31187			31046		31295	31407			93.7736	92.9399		93.0097			93.2351		93.1244	93.1405			1.9042	6.2973		4.4803			6.0074		6.0803	6.4806
644	642	Adaptor/scaffold	Dlg4;Dlg4;Dlg4	PSD-95;PSD-95 iso 2;PSD-95 iso 3	§240;283;237	Disks large homolog 4	Q62108;Q62108-2;Q62108-3	http://www.phosphosite.org/proteinAction.do?id=7101&showAllSites=true	80.4	KNTYDVVyLKVAKPS			ILAVNSVGLEDVM#HEDAVAALKNTYDVVY*LK	4	872.187	31343	31624	31127	31127	31553	31471	31045	31354	31286	31396	31458	31111	93.6603	92.8413	93.3535	92.8483	93.3438	92.9058	93.2327	92.9912	93.1005	93.1119	93.1968	93.0594	3.3937	7.1409	5.2761	7.5083	6.6293	7.5348	6.7211	7.09	7.19	6.2277
645	643	Adaptor/scaffold	Dlg4;Dlg4;Dlg4	PSD-95;PSD-95 iso 2;PSD-95 iso 3	§240;283;237	Disks large homolog 4	Q62108;Q62108-2;Q62108-3	http://www.phosphosite.org/proteinAction.do?id=7101&showAllSites=true	80.4	KNTYDVVyLKVAKPS			ILAVNSVGLEDVM#HEDAVAALKNTYDVVY*LK	4	872.187									31344												93.2542												5.3854
646	644	Adaptor/scaffold	Dlg4;Dlg4;Dlg4	PSD-95;PSD-95 iso 2;PSD-95 iso 3	§240;283;237	Disks large homolog 4	Q62108;Q62108-2;Q62108-3	http://www.phosphosite.org/proteinAction.do?id=7101&showAllSites=true	80.4	KNTYDVVyLKVAKPS			ILAVNSVGLEDVMHEDAVAALKNTYDVVY*LK	3	1157.25	36134	36633	36029	36143	36519	36493	35989	36403	36248	36352	36396	36070	106.709	106.304	106.642	106.311	106.593	106.335	106.521	106.534	106.448	106.392	106.448	106.393	9.3328	8.2482	5.1748	8.6474	8.7228	8.3778	8.3235	1.6069	7.8435	9.1715
647	645	Adaptor/scaffold	Dlg4;Dlg4;Dlg4	PSD-95;PSD-95 iso 2;PSD-95 iso 3	§240;283;237	Disks large homolog 4	Q62108;Q62108-2;Q62108-3	http://www.phosphosite.org/proteinAction.do?id=7101&showAllSites=true	80.4	KNTYDVVyLKVAKPS			ILAVNSVGLEDVMHEDAVAALKNTYDVVY*LK	3	1157.25								36340												106.369												8.1138
648	646	Adaptor/scaffold	Dlg4;Dlg4;Dlg4	PSD-95;PSD-95 iso 2;PSD-95 iso 3	§240;283;237	Disks large homolog 4	Q62108;Q62108-2;Q62108-3	http://www.phosphosite.org/proteinAction.do?id=7101&showAllSites=true	80.4	KNTYDVVyLKVAKPS			ILAVNSVGLEDVMHEDAVAALKNTYDVVY*LK	4	868.189	36147	36632	36019	36142	36518	36492	35999	36339	36317	36348	36395	36061	106.745	106.3	106.616	106.306	106.589	106.331	106.547	106.364	106.631	106.38	106.443	106.371	6.0853	7.7835	7.8427	7.8248	8.9791	7.875	6.6812	7.8416	2.4136	7.9693
649	647	Adaptor/scaffold	Dlg4;Dlg4;Dlg4	PSD-95;PSD-95 iso 2;PSD-95 iso 3	§240;283;237	Disks large homolog 4	Q62108;Q62108-2;Q62108-3	http://www.phosphosite.org/proteinAction.do?id=7101&showAllSites=true	80.4	KNTYDVVyLKVAKPS			ILAVNSVGLEDVMHEDAVAALKNTYDVVY*LK	4	868.189				36136					36251							106.29					106.455							7.1361					7.9628
650	648	Adaptor/scaffold	Dlg4;Dlg4;Dlg4	PSD-95;PSD-95 iso 2;PSD-95 iso 3	§240;283;237	Disks large homolog 4	Q62108;Q62108-2;Q62108-3	http://www.phosphosite.org/proteinAction.do?id=7101&showAllSites=true	80.4	KNTYDVVyLKVAKPS			LQIGDKILAVNSVGLEDVM#HEDAVAALKNTYDVVY*LK	4	1035.78	31999	32268	31760	31800	32284	32128	31761	31989	32079	32038	32084	31810	95.468	94.5908	95.0879	94.6486	95.2972	94.6582	95.1548	94.6954	95.2276	94.8376	94.8949	94.9323	1.8645	10.0834	7.7019	11.4301	11.1315	11.6787	10.9132	9.9091	2.2609	6.5546
651	649	Adaptor/scaffold	Dlg4;Dlg4;Dlg4	PSD-95;PSD-95 iso 2;PSD-95 iso 3	§240;283;237	Disks large homolog 4	Q62108;Q62108-2;Q62108-3	http://www.phosphosite.org/proteinAction.do?id=7101&showAllSites=true	80.4	KNTYDVVyLKVAKPS			LQIGDKILAVNSVGLEDVM#HEDAVAALKNTYDVVY*LK	4	1035.78	32015				32221	32176			31974				95.5134				95.1298	94.7877			94.9489				3.8334				9.8747	9.6838			10.849
652	650	Adaptor/scaffold	Dlg4;Dlg4;Dlg4	PSD-95;PSD-95 iso 2;PSD-95 iso 3	§240;283;237	Disks large homolog 4	Q62108;Q62108-2;Q62108-3	http://www.phosphosite.org/proteinAction.do?id=7101&showAllSites=true	80.4	KNTYDVVyLKVAKPS			LQIGDKILAVNSVGLEDVMHEDAVAALKNTYDVVY*LK	4	1031.78	36067	36573	35992	36079	36455	36443		36304		36332	36325	36017	106.529	106.145	106.546	106.142	106.422	106.202		106.271		106.339	106.259	106.254	12.0967	10.7449	2.3678	11.8688	8.6973	9.8209		5.1617		8.0241
653	651	Adaptor/scaffold	Dlg4;Dlg4;Dlg4	PSD-95;PSD-95 iso 2;PSD-95 iso 3	§240;283;237	Disks large homolog 4	Q62108;Q62108-2;Q62108-3	http://www.phosphosite.org/proteinAction.do?id=7101&showAllSites=true	80.4	KNTYDVVyLKVAKPS			LQIGDKILAVNSVGLEDVMHEDAVAALKNTYDVVY*LK	4	1031.78				36129												106.273												5.0266
654	652	Adaptor/scaffold	Dlg4;Dlg4;Dlg4	PSD-95;PSD-95 iso 2;PSD-95 iso 3	§240;283;237	Disks large homolog 4	Q62108;Q62108-2;Q62108-3	http://www.phosphosite.org/proteinAction.do?id=7101&showAllSites=true	80.4	KNTYDVVyLKVAKPS			LQIGDKILAVNSVGLEDVMHEDAVAALKNTYDVVY*LK	5	825.626				36096		36444	35945	36308	36184							106.187		106.206	106.406	106.283	106.278							7.0257		7.6645	2.3485	1.9309	7.6518
655	653	Adaptor/scaffold	Dlg4;Dlg4;Dlg4	PSD-95;PSD-95 iso 2;PSD-95 iso 3	§240;283;237	Disks large homolog 4	Q62108;Q62108-2;Q62108-3	http://www.phosphosite.org/proteinAction.do?id=7101&showAllSites=true	80.4	KNTYDVVyLKVAKPS			LQIGDKILAVNSVGLEDVMHEDAVAALKNTYDVVY*LK	5	825.626							35934												106.375												6.0007
656	654	Adaptor/scaffold	Dlg4;Dlg4;Dlg4	PSD-95;PSD-95 iso 2;PSD-95 iso 3	§240;283;237	Disks large homolog 4	Q62108;Q62108-2;Q62108-3	http://www.phosphosite.org/proteinAction.do?id=7101&showAllSites=true	80.4	KNTYDVVyLKVAKPS			NTYDVVY*LK	2	597.776	22031	22292	21994	21824	22159	22086	21689	21992	21946	21998	22104	21754	68.3806	67.8532	68.6586	67.8734	68.1472	67.8308	68.1022	67.925	68.057	67.9523	68.0252	67.9688	2.5079	3.1706	1.9602	3.1705	3.2028	3.1726	3.1719	3.2449	3.0737	3.1501
657	655	Adaptor/scaffold	Dlg4;Dlg4;Dlg4	PSD-95;PSD-95 iso 2;PSD-95 iso 3	§240;283;237	Disks large homolog 4	Q62108;Q62108-2;Q62108-3	http://www.phosphosite.org/proteinAction.do?id=7101&showAllSites=true	80.4	KNTYDVVyLKVAKPS			NTYDVVY*LK	2	597.776	22237		21787									21863	68.9404		68.1009									68.2646	2.8177		2.9066
658	656	Adaptor/scaffold	Dlg4;Dlg4;Dlg4	PSD-95;PSD-95 iso 2;PSD-95 iso 3	§294;337;291	Disks large homolog 4	Q62108;Q62108-2;Q62108-3	http://www.phosphosite.org/proteinAction.do?id=7101&showAllSites=true	80.4	TPTSPRRySPVAKDL			RY*SPVAK	2	450.721				4225		4202			4227	4140						20.2533		19.9459			20.1247	19.7829						1.1614		1.1553			1.3838	1.1778
659	657	Adaptor/scaffold	Dlg4;Dlg4;Dlg4	PSD-95;PSD-95 iso 2;PSD-95 iso 3	§295;338;292	Disks large homolog 4	Q62108;Q62108-2;Q62108-3	http://www.phosphosite.org/proteinAction.do?id=7101&showAllSites=true	80.4	PTSPRRYsPVAKDLL			RYS*PVAK	2	450.721												4072												20.2029
660	658	Adaptor/scaffold	Dlg4;Dlg4;Dlg4	PSD-95;PSD-95 iso 2;PSD-95 iso 3	§398;441;395	Disks large homolog 4	Q62108;Q62108-2;Q62108-3	http://www.phosphosite.org/proteinAction.do?id=7101&showAllSites=true	80.4	QYKPEEYsRFEAKIH			NAGQTVTIIAQYKPEEYS*RFEAK	4	681.582			21006												65.9775												1.7017
661	659	Adaptor/scaffold	Dlg4;Dlg4;Dlg4	PSD-95;PSD-95 iso 2;PSD-95 iso 3	§432;475;429	Disks large homolog 4	Q62108;Q62108-2;Q62108-3	http://www.phosphosite.org/proteinAction.do?id=7101&showAllSites=true	80.4	SNPKRGFyIRALFDY			RGFY*IR	2	446.215		15677		15243						15508				50.0844		50.1044						50.4458				1.9278		2.0437						1.1788
662	660	Adaptor/scaffold	Dlg4;Dlg4;Dlg4	PSD-95;PSD-95 iso 2;PSD-95 iso 3	§580;623;577	Disks large homolog 4	Q62108;Q62108-2;Q62108-3	http://www.phosphosite.org/proteinAction.do?id=7101&showAllSites=true	80.4	YEIDGRDyHFVSSRE			DY*HFVSSR	2	545.721	10485	10539	10133	10108	10369	10290	9985	10255	10225	10273	10381	10019	36.724	36.2936	36.4739	36.2981	36.5173	36.3218	36.5068	36.3694	36.4849	36.3819	36.3729	36.4203	1.9637	2.3584	2.2989	2.3983	2.3675	2.4059	2.2418	2.134	2.1441	2.4402
663	661	Adaptor/scaffold	Dlg4;Dlg4;Dlg4	PSD-95;PSD-95 iso 2;PSD-95 iso 3	§580;623;577	Disks large homolog 4	Q62108;Q62108-2;Q62108-3	http://www.phosphosite.org/proteinAction.do?id=7101&showAllSites=true	80.4	YEIDGRDyHFVSSRE			DY*HFVSSR	3	364.15	10495	10558										10008	36.7508	36.344										36.3938	1.0685	1.2624
664	662	Adaptor/scaffold	Dlg4;Dlg4;Dlg4	PSD-95;PSD-95 iso 2;PSD-95 iso 3	§580;623;577	Disks large homolog 4	Q62108;Q62108-2;Q62108-3	http://www.phosphosite.org/proteinAction.do?id=7101&showAllSites=true	80.4	YEIDGRDyHFVSSRE			EYEIDGRDY*HFVSSR	3	651.611	16194	16329	15863	15879	16228	16108	15752	16066	15976	16036	16186	15782	52.4094	51.8941	52.0789	51.8999	52.2397	51.8744	52.0946	52.0103	52.035	51.9494	52.0836	51.9728	2.9041	4.435	3.708	3.5547	4.6086	4.291	4.1974	3.3355	4.4113	3.4685
665	663	Adaptor/scaffold	Dlg4;Dlg4;Dlg4	PSD-95;PSD-95 iso 2;PSD-95 iso 3	§580;623;577	Disks large homolog 4	Q62108;Q62108-2;Q62108-3	http://www.phosphosite.org/proteinAction.do?id=7101&showAllSites=true	80.4	YEIDGRDyHFVSSRE			REYEIDGRDY*HFVSSR	3	703.644	14253	14287	13869	13799	14162	14025	13700	13955	13969	13995	14155	13776	47.0154	46.3396	46.6	46.2117	46.6538	46.2714	46.4985	46.2685	46.5411	46.351	46.536	46.4854	2.5823	3.1949	2.6253	2.9081	3.0128	2.5892	2.982	2.5847	3.9055	3.1606
666	664	Adaptor/scaffold	Dlg4;Dlg4;Dlg4	PSD-95;PSD-95 iso 2;PSD-95 iso 3	§580;623;577	Disks large homolog 4	Q62108;Q62108-2;Q62108-3	http://www.phosphosite.org/proteinAction.do?id=7101&showAllSites=true	80.4	YEIDGRDyHFVSSRE			REYEIDGRDY*HFVSSR	4	527.985	14245	14285	13867	13793	14158	14024	13704	13943	13967	13989	14149	13775	46.9941	46.3347	46.5931	46.1974	46.6442	46.2669	46.5102	46.2378	46.536	46.3364	46.5194	46.481	3.3766	3.1011	2.8336	3.6116	3.0663	3.2428	3.5163	3.0563	3.1489	3.082
667	665	Adaptor/scaffold	Dlg4;Dlg4;Dlg4	PSD-95;PSD-95 iso 2;PSD-95 iso 3	§604;647;601	Disks large homolog 4	Q62108;Q62108-2;Q62108-3	http://www.phosphosite.org/proteinAction.do?id=7101&showAllSites=true	80.4	KFIEAGQyNSHLYGT			FIEAGQY*NSHLYGTSVQSVR	3	779.362	18951	19122	18664	18671	19026	18928	18543	18861	18841	18859	18947	18598	59.9987	59.3633	59.6695	59.3944	59.7347	59.3897	59.6449	59.5043	59.73	59.5319	59.5409	59.5195	4.3575	5.1866	4.7962	5.3789	5.2088	5.6309	4.8892	4.9668	2.3846	5.2487
668	666	Adaptor/scaffold	Dlg4;Dlg4;Dlg4	PSD-95;PSD-95 iso 2;PSD-95 iso 3	§604;647;601	Disks large homolog 4	Q62108;Q62108-2;Q62108-3	http://www.phosphosite.org/proteinAction.do?id=7101&showAllSites=true	80.4	KFIEAGQyNSHLYGT			FIEAGQY*NSHLYGTSVQSVR	3	779.362									18796												59.6037												4.8601
669	667	Adaptor/scaffold	Dlg4;Dlg4;Dlg4	PSD-95;PSD-95 iso 2;PSD-95 iso 3	§715;758;712	Disks large homolog 4	Q62108;Q62108-2;Q62108-3	http://www.phosphosite.org/proteinAction.do?id=7101&showAllSites=true	80.4	IEDLSGPyIWVPARE			VIEDLSGPY*IWVPAR	2	897.945	30504	30915	30325	30410		30716	30255	30616	30534	30600	30646	30315	91.3611	90.9362	91.1758	90.9339		90.8927	91.1116	91.0211	91.0824	90.9825	91.0122	90.9332	2.9469	4.2798	2.9032	3.8236		4.0316	3.9338	3.3702	3.4651	3.9045
670	668	Adaptor/scaffold	Dlg4;Dlg4;Dlg4	PSD-95;PSD-95 iso 2;PSD-95 iso 3	235, §240;278, 283;232, 237	Disks large homolog 4	Q62108;Q62108-2;Q62108-3	http://www.phosphosite.org/proteinAction.do?id=7101&showAllSites=true	80.4	AVAALKNtYDVVYLK;KNTYDVVyLKVAKPS			ILAVNSVGLEDVMHEDAVAALKNT*YDVVY*LK	4	888.18		36431		35914							36185			105.764		105.698							105.887			1.2867		2.2765
671	669	Adaptor/scaffold	Dlg4;Dlg4;Dlg4	PSD-95;PSD-95 iso 2;PSD-95 iso 3	235;278;232	Disks large homolog 4	Q62108;Q62108-2;Q62108-3	http://www.phosphosite.org/proteinAction.do?id=7101&showAllSites=true	80.4	AVAALKNtYDVVYLK			ILAVNSVGLEDVMHEDAVAALKNT*YDVVYLK	3	1157.25		36377	35831	35894				36125						105.619	106.111	105.645				105.799						5.2487	1.3852	3.5501				1.0415
672	670	Adaptor/scaffold	Dlg4;Dlg4;Dlg4	PSD-95;PSD-95 iso 2;PSD-95 iso 3	235;278;232	Disks large homolog 4	Q62108;Q62108-2;Q62108-3	http://www.phosphosite.org/proteinAction.do?id=7101&showAllSites=true	80.4	AVAALKNtYDVVYLK			ILAVNSVGLEDVMHEDAVAALKNT*YDVVYLK	3	1157.25				35879				36108								105.604				105.754								4.2513				5.3352
673	671	Adaptor/scaffold	Dlg4;Dlg4;Dlg4	PSD-95;PSD-95 iso 2;PSD-95 iso 3	250, 289;293, 332;247, 286	Disks large homolog 4	Q62108;Q62108-2;Q62108-3	http://www.phosphosite.org/proteinAction.do?id=7101&showAllSites=true	80.4	VAKPSNAyLSDSYAP;YPTAMTPtSPRRYSP			VAKPSNAY*LSDSYAPPDITTSYSQHLDNEISHSSYLGTDYPTAM#TPT*SPR	5	1125.3		26559												79.2703												4.1612
674	672	Adaptor/scaffold	Dlg4;Dlg4;Dlg4	PSD-95;PSD-95 iso 2;PSD-95 iso 3	252, §290;§295, 333;249, 287	Disks large homolog 4	Q62108;Q62108-2;Q62108-3	http://www.phosphosite.org/proteinAction.do?id=7101&showAllSites=true	80.4	KPSNAYLsDSYAPPD;PTAMTPTsPRRYSPV			VAKPSNAYLS*DSYAPPDITTSYSQHLDNEISHSSYLGTDYPTAM#TPTS*PR	4	1406.37				25737												78.3849												3.2043
675	673	Adaptor/scaffold	Dlg4;Dlg4;Dlg4	PSD-95;PSD-95 iso 2;PSD-95 iso 3	252, 289;§295, 332;249, 286	Disks large homolog 4	Q62108;Q62108-2;Q62108-3	http://www.phosphosite.org/proteinAction.do?id=7101&showAllSites=true	80.4	KPSNAYLsDSYAPPD;YPTAMTPtSPRRYSP			VAKPSNAYLS*DSYAPPDITTSYSQHLDNEISHSSYLGTDYPTAM#TPT*SPR	5	1125.3											26320												79.3339
676	674	Adaptor/scaffold	Dlg4;Dlg4;Dlg4	PSD-95;PSD-95 iso 2;PSD-95 iso 3	254, §290;297, 333;251, 287	Disks large homolog 4	Q62108;Q62108-2;Q62108-3	http://www.phosphosite.org/proteinAction.do?id=7101&showAllSites=true	80.4	SNAYLSDsYAPPDIT;PTAMTPTsPRRYSPV			VAKPSNAYLSDS*YAPPDITTSYSQHLDNEISHSSYLGTDYPTAM#TPTS*PR	5	1125.3									25896		25923										78.6238		78.2703										4.9313
677	675	Adaptor/scaffold	Dlg4;Dlg4;Dlg4	PSD-95;PSD-95 iso 2;PSD-95 iso 3	254, §290;297, 333;251, 287	Disks large homolog 4	Q62108;Q62108-2;Q62108-3	http://www.phosphosite.org/proteinAction.do?id=7101&showAllSites=true	80.4	SNAYLSDsYAPPDIT;PTAMTPTsPRRYSPV			VAKPSNAYLSDS*YAPPDITTSYSQHLDNEISHSSYLGTDYPTAMTPTS*PR	4	1402.37		27317	26743	26790				26964			27074			81.3048	81.4733	81.2286				81.238			81.3606			3.0943	3.253	3.1719				7.2084
678	676	Adaptor/scaffold	Dlg4;Dlg4;Dlg4	PSD-95;PSD-95 iso 2;PSD-95 iso 3	254, §290;297, 333;251, 287	Disks large homolog 4	Q62108;Q62108-2;Q62108-3	http://www.phosphosite.org/proteinAction.do?id=7101&showAllSites=true	80.4	SNAYLSDsYAPPDIT;PTAMTPTsPRRYSPV			VAKPSNAYLSDS*YAPPDITTSYSQHLDNEISHSSYLGTDYPTAMTPTS*PR	5	1122.1			26805	26830		27050									81.6399	81.3369		81.0972									3.6148	5.6483		5.2946
679	677	Adaptor/scaffold	Dlg4;Dlg4;Dlg4	PSD-95;PSD-95 iso 2;PSD-95 iso 3	254, 284, §290;297, 327, 333;251, 281, 287	Disks large homolog 4	Q62108;Q62108-2;Q62108-3	http://www.phosphosite.org/proteinAction.do?id=7101&showAllSites=true	80.4	SNAYLSDsYAPPDIT;YLGTDYPtAMTPTSP;PTAMTPTsPRRYSPV			VAKPSNAYLSDS*YAPPDITTSYSQHLDNEISHSSYLGTDYPT*AMTPTS*PR	5	1138.09										27593												82.9336												1.4796
680	678	Adaptor/scaffold	Dlg4;Dlg4;Dlg4	PSD-95;PSD-95 iso 2;PSD-95 iso 3	254, 287, 289;297, 330, 332;251, 284, 286	Disks large homolog 4	Q62108;Q62108-2;Q62108-3	http://www.phosphosite.org/proteinAction.do?id=7101&showAllSites=true	80.4	SNAYLSDsYAPPDIT;TDYPTAMtPTSPRRY;YPTAMTPtSPRRYSP			VAKPSNAYLSDS*YAPPDITTSYSQHLDNEISHSSYLGTDYPTAMT*PT*SPR	5	1138.09					27709												83.0455												3.3146
681	679	Adaptor/scaffold	Dlg4;Dlg4;Dlg4	PSD-95;PSD-95 iso 2;PSD-95 iso 3	254, 287;297, 330;251, 284	Disks large homolog 4	Q62108;Q62108-2;Q62108-3	http://www.phosphosite.org/proteinAction.do?id=7101&showAllSites=true	80.4	SNAYLSDsYAPPDIT;TDYPTAMtPTSPRRY			VAKPSNAYLSDS*YAPPDITTSYSQHLDNEISHSSYLGTDYPTAM#T*PTSPR	4	1406.37									25875												78.5691												3.0443
682	680	Adaptor/scaffold	Dlg4;Dlg4;Dlg4	PSD-95;PSD-95 iso 2;PSD-95 iso 3	254, 289;297, 332;251, 286	Disks large homolog 4	Q62108;Q62108-2;Q62108-3	http://www.phosphosite.org/proteinAction.do?id=7101&showAllSites=true	80.4	SNAYLSDsYAPPDIT;YPTAMTPtSPRRYSP			VAKPSNAYLSDS*YAPPDITTSYSQHLDNEISHSSYLGTDYPTAM#TPT*SPR	4	1406.37								25912												78.398												4.6879
683	681	Adaptor/scaffold	Dlg4;Dlg4;Dlg4	PSD-95;PSD-95 iso 2;PSD-95 iso 3	254, 289;297, 332;251, 286	Disks large homolog 4	Q62108;Q62108-2;Q62108-3	http://www.phosphosite.org/proteinAction.do?id=7101&showAllSites=true	80.4	SNAYLSDsYAPPDIT;YPTAMTPtSPRRYSP			VAKPSNAYLSDS*YAPPDITTSYSQHLDNEISHSSYLGTDYPTAM#TPT*SPR	5	1125.3								25925		26009										78.4317		78.6781										4.4022		3.7071
684	682	Adaptor/scaffold	Dlg4;Dlg4;Dlg4	PSD-95;PSD-95 iso 2;PSD-95 iso 3	254, 289;297, 332;251, 286	Disks large homolog 4	Q62108;Q62108-2;Q62108-3	http://www.phosphosite.org/proteinAction.do?id=7101&showAllSites=true	80.4	SNAYLSDsYAPPDIT;YPTAMTPtSPRRYSP			VAKPSNAYLSDS*YAPPDITTSYSQHLDNEISHSSYLGTDYPTAMTPT*SPR	4	1402.37											27099												81.4246
685	683	Adaptor/scaffold	Dlg4;Dlg4;Dlg4	PSD-95;PSD-95 iso 2;PSD-95 iso 3	254, 289;297, 332;251, 286	Disks large homolog 4	Q62108;Q62108-2;Q62108-3	http://www.phosphosite.org/proteinAction.do?id=7101&showAllSites=true	80.4	SNAYLSDsYAPPDIT;YPTAMTPtSPRRYSP			VAKPSNAYLSDS*YAPPDITTSYSQHLDNEISHSSYLGTDYPTAMTPT*SPR	5	1122.1	27083	27334	26769										82.0233	81.3498	81.5425										2.9342	4.1433	4.0554
686	684	Adaptor/scaffold	Dlg4;Dlg4;Dlg4	PSD-95;PSD-95 iso 2;PSD-95 iso 3	254;297;251	Disks large homolog 4	Q62108;Q62108-2;Q62108-3	http://www.phosphosite.org/proteinAction.do?id=7101&showAllSites=true	80.4	SNAYLSDsYAPPDIT			VAKPSNAYLSDS*YAPPDITTSYSQHLDNEISHSSYLGTDYPTAM#TPTSPR	5	1109.3					25184												76.2643												6.4774
687	685	Adaptor/scaffold	Dlg4;Dlg4;Dlg4	PSD-95;PSD-95 iso 2;PSD-95 iso 3	254;297;251	Disks large homolog 4	Q62108;Q62108-2;Q62108-3	http://www.phosphosite.org/proteinAction.do?id=7101&showAllSites=true	80.4	SNAYLSDsYAPPDIT			VAKPSNAYLSDS*YAPPDITTSYSQHLDNEISHSSYLGTDYPTAMTPTSPR	4	1382.38	26198	26468									26297	25948	79.6539	79.029									79.2744	79.1875	1.1835	5.0221
688	686	Adaptor/scaffold	Dlg4;Dlg4;Dlg4	PSD-95;PSD-95 iso 2;PSD-95 iso 3	254;297;251	Disks large homolog 4	Q62108;Q62108-2;Q62108-3	http://www.phosphosite.org/proteinAction.do?id=7101&showAllSites=true	80.4	SNAYLSDsYAPPDIT			VAKPSNAYLSDS*YAPPDITTSYSQHLDNEISHSSYLGTDYPTAMTPTSPR	4	1382.38	26151											25900	79.529											79.0615	2.0355
689	687	Adaptor/scaffold	Dlg4;Dlg4;Dlg4	PSD-95;PSD-95 iso 2;PSD-95 iso 3	254;297;251	Disks large homolog 4	Q62108;Q62108-2;Q62108-3	http://www.phosphosite.org/proteinAction.do?id=7101&showAllSites=true	80.4	SNAYLSDsYAPPDIT			VAKPSNAYLSDS*YAPPDITTSYSQHLDNEISHSSYLGTDYPTAMTPTSPR	5	1106.11	26126						25911		26202			25952	79.4648						79.4345		79.4346			79.1972	5.1682						6.7126		3.3266
690	688	Adaptor/scaffold	Dlg4;Dlg4;Dlg4	PSD-95;PSD-95 iso 2;PSD-95 iso 3	254;297;251	Disks large homolog 4	Q62108;Q62108-2;Q62108-3	http://www.phosphosite.org/proteinAction.do?id=7101&showAllSites=true	80.4	SNAYLSDsYAPPDIT			VAKPSNAYLSDS*YAPPDITTSYSQHLDNEISHSSYLGTDYPTAMTPTSPR	5	1106.11	26185												79.62												5.2235
691	689	Adaptor/scaffold	Dlg4;Dlg4;Dlg4	PSD-95;PSD-95 iso 2;PSD-95 iso 3	255, §290;298, 333;252, 287	Disks large homolog 4	Q62108;Q62108-2;Q62108-3	http://www.phosphosite.org/proteinAction.do?id=7101&showAllSites=true	80.4	NAYLSDSyAPPDITT;PTAMTPTsPRRYSPV			VAKPSNAYLSDSY*APPDITTSYSQHLDNEISHSSYLGTDYPTAM#TPTS*PR	4	1406.37						25992				25925	25956							78.2626				78.4484	78.3591							6.33				5.7627
692	690	Adaptor/scaffold	Dlg4;Dlg4;Dlg4	PSD-95;PSD-95 iso 2;PSD-95 iso 3	255, §290;298, 333;252, 287	Disks large homolog 4	Q62108;Q62108-2;Q62108-3	http://www.phosphosite.org/proteinAction.do?id=7101&showAllSites=true	80.4	NAYLSDSyAPPDITT;PTAMTPTsPRRYSPV			VAKPSNAYLSDSY*APPDITTSYSQHLDNEISHSSYLGTDYPTAM#TPTS*PR	5	1125.3		26196		25667	26021	26031								78.2919		78.1951	78.498	78.3678								6.6676		5.65	6.677	6.6657
693	691	Adaptor/scaffold	Dlg4;Dlg4;Dlg4	PSD-95;PSD-95 iso 2;PSD-95 iso 3	255, §290;298, 333;252, 287	Disks large homolog 4	Q62108;Q62108-2;Q62108-3	http://www.phosphosite.org/proteinAction.do?id=7101&showAllSites=true	80.4	NAYLSDSyAPPDITT;PTAMTPTsPRRYSPV			VAKPSNAYLSDSY*APPDITTSYSQHLDNEISHSSYLGTDYPTAM#TPTS*PR	5	1125.3				25719												78.3369												6.1137
694	692	Adaptor/scaffold	Dlg4;Dlg4;Dlg4	PSD-95;PSD-95 iso 2;PSD-95 iso 3	255, §290;298, 333;252, 287	Disks large homolog 4	Q62108;Q62108-2;Q62108-3	http://www.phosphosite.org/proteinAction.do?id=7101&showAllSites=true	80.4	NAYLSDSyAPPDITT;PTAMTPTsPRRYSPV			VAKPSNAYLSDSY*APPDITTSYSQHLDNEISHSSYLGTDYPTAMTPTS*PR	4	1402.37	26966		26679	26750	27121	27034				26930			81.7125		81.3026	81.1233	81.4568	81.0524				81.1578			3.0295		3.0171	5.8651	6.0983	6.125				5.4254
695	693	Adaptor/scaffold	Dlg4;Dlg4;Dlg4	PSD-95;PSD-95 iso 2;PSD-95 iso 3	255, §290;298, 333;252, 287	Disks large homolog 4	Q62108;Q62108-2;Q62108-3	http://www.phosphosite.org/proteinAction.do?id=7101&showAllSites=true	80.4	NAYLSDSyAPPDITT;PTAMTPTsPRRYSPV			VAKPSNAYLSDSY*APPDITTSYSQHLDNEISHSSYLGTDYPTAMTPTS*PR	4	1402.37										26920												81.1291												5.4887
696	694	Adaptor/scaffold	Dlg4;Dlg4;Dlg4	PSD-95;PSD-95 iso 2;PSD-95 iso 3	255, §290;298, 333;252, 287	Disks large homolog 4	Q62108;Q62108-2;Q62108-3	http://www.phosphosite.org/proteinAction.do?id=7101&showAllSites=true	80.4	NAYLSDSyAPPDITT;PTAMTPTsPRRYSPV			VAKPSNAYLSDSY*APPDITTSYSQHLDNEISHSSYLGTDYPTAMTPTS*PR	5	1122.1							26636	26936	26916	27002		26710							81.3771	81.1576	81.3458	81.3528		81.2177							7.7693	7.169	7.0868	6.1767
697	695	Adaptor/scaffold	Dlg4;Dlg4;Dlg4	PSD-95;PSD-95 iso 2;PSD-95 iso 3	255, §290;298, 333;252, 287	Disks large homolog 4	Q62108;Q62108-2;Q62108-3	http://www.phosphosite.org/proteinAction.do?id=7101&showAllSites=true	80.4	NAYLSDSyAPPDITT;PTAMTPTsPRRYSPV			VAKPSNAYLSDSY*APPDITTSYSQHLDNEISHSSYLGTDYPTAMTPTS*PR	5	1122.1							26608			26938		26636							81.3038			81.1768		81.0188							6.9875			5.5618
698	696	Adaptor/scaffold	Dlg4;Dlg4;Dlg4	PSD-95;PSD-95 iso 2;PSD-95 iso 3	255, 284;298, 327;252, 281	Disks large homolog 4	Q62108;Q62108-2;Q62108-3	http://www.phosphosite.org/proteinAction.do?id=7101&showAllSites=true	80.4	NAYLSDSyAPPDITT;YLGTDYPtAMTPTSP			VAKPSNAYLSDSY*APPDITTSYSQHLDNEISHSSYLGTDYPT*AM#TPTSPR	4	1406.37		26279												78.5197												1.6997
699	697	Adaptor/scaffold	Dlg4;Dlg4;Dlg4	PSD-95;PSD-95 iso 2;PSD-95 iso 3	255, 287, §290;298, 330, 333;252, 284, 287	Disks large homolog 4	Q62108;Q62108-2;Q62108-3	http://www.phosphosite.org/proteinAction.do?id=7101&showAllSites=true	80.4	NAYLSDSyAPPDITT;TDYPTAMtPTSPRRY;PTAMTPTsPRRYSPV			VAKPSNAYLSDSY*APPDITTSYSQHLDNEISHSSYLGTDYPTAMT*PTS*PR	5	1138.09		27859												82.7576												4.2461
700	698	Adaptor/scaffold	Dlg4;Dlg4;Dlg4	PSD-95;PSD-95 iso 2;PSD-95 iso 3	255, 287, 289;298, 330, 332;252, 284, 286	Disks large homolog 4	Q62108;Q62108-2;Q62108-3	http://www.phosphosite.org/proteinAction.do?id=7101&showAllSites=true	80.4	NAYLSDSyAPPDITT;TDYPTAMtPTSPRRY;YPTAMTPtSPRRYSP			VAKPSNAYLSDSY*APPDITTSYSQHLDNEISHSSYLGTDYPTAMT*PT*SPR	4	1422.36					27673												82.9501												2.4261
701	699	Adaptor/scaffold	Dlg4;Dlg4;Dlg4	PSD-95;PSD-95 iso 2;PSD-95 iso 3	255, 289;298, 332;252, 286	Disks large homolog 4	Q62108;Q62108-2;Q62108-3	http://www.phosphosite.org/proteinAction.do?id=7101&showAllSites=true	80.4	NAYLSDSyAPPDITT;YPTAMTPtSPRRYSP			VAKPSNAYLSDSY*APPDITTSYSQHLDNEISHSSYLGTDYPTAM#TPT*SPR	5	1125.3				25773		26085	25559									78.4797		78.5134	78.4913									3.7795		4.3792	5.9878
702	700	Adaptor/scaffold	Dlg4;Dlg4;Dlg4	PSD-95;PSD-95 iso 2;PSD-95 iso 3	255, 289;298, 332;252, 286	Disks large homolog 4	Q62108;Q62108-2;Q62108-3	http://www.phosphosite.org/proteinAction.do?id=7101&showAllSites=true	80.4	NAYLSDSyAPPDITT;YPTAMTPtSPRRYSP			VAKPSNAYLSDSY*APPDITTSYSQHLDNEISHSSYLGTDYPTAMTPT*SPR	4	1402.37		27249								26989				81.1249								81.3175				4.0856								4.4517
703	701	Adaptor/scaffold	Dlg4;Dlg4;Dlg4	PSD-95;PSD-95 iso 2;PSD-95 iso 3	255, 289;298, 332;252, 286	Disks large homolog 4	Q62108;Q62108-2;Q62108-3	http://www.phosphosite.org/proteinAction.do?id=7101&showAllSites=true	80.4	NAYLSDSyAPPDITT;YPTAMTPtSPRRYSP			VAKPSNAYLSDSY*APPDITTSYSQHLDNEISHSSYLGTDYPTAMTPT*SPR	5	1122.1	27113				27119						27071	26762	82.1018				81.4497						81.3512	81.3619	2.4623				5.4592
704	702	Adaptor/scaffold	Dlg4;Dlg4;Dlg4	PSD-95;PSD-95 iso 2;PSD-95 iso 3	255, 289;298, 332;252, 286	Disks large homolog 4	Q62108;Q62108-2;Q62108-3	http://www.phosphosite.org/proteinAction.do?id=7101&showAllSites=true	80.4	NAYLSDSyAPPDITT;YPTAMTPtSPRRYSP			VAKPSNAYLSDSY*APPDITTSYSQHLDNEISHSSYLGTDYPTAMTPT*SPR	5	1122.1	26919				27213						27009		81.5872				81.7062						81.1878		5.7389				4.8894
705	703	Adaptor/scaffold	Dlg4;Dlg4;Dlg4	PSD-95;PSD-95 iso 2;PSD-95 iso 3	255, 289;298, 332;252, 286	Disks large homolog 4	Q62108;Q62108-2;Q62108-3	http://www.phosphosite.org/proteinAction.do?id=7101&showAllSites=true	80.4	NAYLSDSyAPPDITT;YPTAMTPtSPRRYSP			VAKPSNAYLSDSY*APPDITTSYSQHLDNEISHSSYLGTDYPTAMTPT*SPR	5	1122.1					27237												81.7675												4.0027
706	704	Adaptor/scaffold	Dlg4;Dlg4;Dlg4	PSD-95;PSD-95 iso 2;PSD-95 iso 3	255;298;252	Disks large homolog 4	Q62108;Q62108-2;Q62108-3	http://www.phosphosite.org/proteinAction.do?id=7101&showAllSites=true	80.4	NAYLSDSyAPPDITT			VAKPSNAYLSDSY*APPDITTSYSQHLDNEISHSSYLGTDYPTAMTPTSPR	4	1382.38			25943			26302			26139	26209					79.3346			79.0869			79.2684	79.207					3.1425			5.1831			2.9626	3.8015
707	705	Adaptor/scaffold	Dlg4;Dlg4;Dlg4	PSD-95;PSD-95 iso 2;PSD-95 iso 3	255;298;252	Disks large homolog 4	Q62108;Q62108-2;Q62108-3	http://www.phosphosite.org/proteinAction.do?id=7101&showAllSites=true	80.4	NAYLSDSyAPPDITT			VAKPSNAYLSDSY*APPDITTSYSQHLDNEISHSSYLGTDYPTAMTPTSPR	4	1382.38										26217												79.2282												3.2836
708	706	Adaptor/scaffold	Dlg4;Dlg4;Dlg4	PSD-95;PSD-95 iso 2;PSD-95 iso 3	255;298;252	Disks large homolog 4	Q62108;Q62108-2;Q62108-3	http://www.phosphosite.org/proteinAction.do?id=7101&showAllSites=true	80.4	NAYLSDSyAPPDITT			VAKPSNAYLSDSY*APPDITTSYSQHLDNEISHSSYLGTDYPTAMTPTSPR	5	1106.11	26265	26444		25954	26344	26267	25884	26202	26114		26304	25883	79.8321	78.9648		78.9603	79.3533	78.9939	79.3628	79.1675	79.2017		79.2934	79.0163	2.021	6.6101		6.5209	7.0334	7.7145	7.2559	6.76	6.5375
709	707	Adaptor/scaffold	Dlg4;Dlg4;Dlg4	PSD-95;PSD-95 iso 2;PSD-95 iso 3	255;298;252	Disks large homolog 4	Q62108;Q62108-2;Q62108-3	http://www.phosphosite.org/proteinAction.do?id=7101&showAllSites=true	80.4	NAYLSDSyAPPDITT			VAKPSNAYLSDSY*APPDITTSYSQHLDNEISHSSYLGTDYPTAMTPTSPR	5	1106.11											26219	25937											79.0691	79.159
710	708	Adaptor/scaffold	Dlg4;Dlg4;Dlg4	PSD-95;PSD-95 iso 2;PSD-95 iso 3	263, §290;306, 333;260, 287	Disks large homolog 4	Q62108;Q62108-2;Q62108-3	http://www.phosphosite.org/proteinAction.do?id=7101&showAllSites=true	80.4	APPDITTsYSQHLDN;PTAMTPTsPRRYSPV			VAKPSNAYLSDSYAPPDITTS*YSQHLDNEISHSSYLGTDYPTAMTPTS*PR	4	1402.37		26927			26740	26786				26200		25882		80.2603			80.4423	80.3773				79.1832		79.0136		4.1756			4.9733	1.8777				4.393
711	709	Adaptor/scaffold	Dlg4;Dlg4;Dlg4	PSD-95;PSD-95 iso 2;PSD-95 iso 3	263, §290;306, 333;260, 287	Disks large homolog 4	Q62108;Q62108-2;Q62108-3	http://www.phosphosite.org/proteinAction.do?id=7101&showAllSites=true	80.4	APPDITTsYSQHLDN;PTAMTPTsPRRYSPV			VAKPSNAYLSDSYAPPDITTS*YSQHLDNEISHSSYLGTDYPTAMTPTS*PR	4	1402.37		26472												79.0384												5.9153
712	710	Adaptor/scaffold	Dlg4;Dlg4;Dlg4	PSD-95;PSD-95 iso 2;PSD-95 iso 3	263, §290;306, 333;260, 287	Disks large homolog 4	Q62108;Q62108-2;Q62108-3	http://www.phosphosite.org/proteinAction.do?id=7101&showAllSites=true	80.4	APPDITTsYSQHLDN;PTAMTPTsPRRYSPV			VAKPSNAYLSDSYAPPDITTS*YSQHLDNEISHSSYLGTDYPTAMTPTS*PR	5	1122.1		26486								26193		26321		79.074								79.1645		80.1789		4.6694								7.2119
713	711	Adaptor/scaffold	Dlg4;Dlg4;Dlg4	PSD-95;PSD-95 iso 2;PSD-95 iso 3	263, §290;306, 333;260, 287	Disks large homolog 4	Q62108;Q62108-2;Q62108-3	http://www.phosphosite.org/proteinAction.do?id=7101&showAllSites=true	80.4	APPDITTsYSQHLDN;PTAMTPTsPRRYSPV			VAKPSNAYLSDSYAPPDITTS*YSQHLDNEISHSSYLGTDYPTAMTPTS*PR	5	1122.1										26632		26360										80.3552		80.2851										4.6291
714	712	Adaptor/scaffold	Dlg4;Dlg4;Dlg4	PSD-95;PSD-95 iso 2;PSD-95 iso 3	263, 287;306, 330;260, 284	Disks large homolog 4	Q62108;Q62108-2;Q62108-3	http://www.phosphosite.org/proteinAction.do?id=7101&showAllSites=true	80.4	APPDITTsYSQHLDN;TDYPTAMtPTSPRRY			VAKPSNAYLSDSYAPPDITTS*YSQHLDNEISHSSYLGTDYPTAMT*PTSPR	4	1402.37												25947												79.1852
715	713	Adaptor/scaffold	Dlg4;Dlg4;Dlg4	PSD-95;PSD-95 iso 2;PSD-95 iso 3	263;306;260	Disks large homolog 4	Q62108;Q62108-2;Q62108-3	http://www.phosphosite.org/proteinAction.do?id=7101&showAllSites=true	80.4	APPDITTsYSQHLDN			VAKPSNAYLSDSYAPPDITTS*YSQHLDNEISHSSYLGTDYPTAMTPTSPR	5	1106.11										25480												77.2481												1.5152
716	714	Adaptor/scaffold	Dlg4;Dlg4;Dlg4	PSD-95;PSD-95 iso 2;PSD-95 iso 3	264, §290;307, 333;261, 287	Disks large homolog 4	Q62108;Q62108-2;Q62108-3	http://www.phosphosite.org/proteinAction.do?id=7101&showAllSites=true	80.4	PPDITTSySQHLDNE;PTAMTPTsPRRYSPV			VAKPSNAYLSDSYAPPDITTSY*SQHLDNEISHSSYLGTDYPTAMTPTS*PR	4	1402.37							25876												79.3413												2.9055
717	715	Adaptor/scaffold	Dlg4;Dlg4;Dlg4	PSD-95;PSD-95 iso 2;PSD-95 iso 3	264, 289;307, 332;261, 286	Disks large homolog 4	Q62108;Q62108-2;Q62108-3	http://www.phosphosite.org/proteinAction.do?id=7101&showAllSites=true	80.4	PPDITTSySQHLDNE;YPTAMTPtSPRRYSP			VAKPSNAYLSDSYAPPDITTSY*SQHLDNEISHSSYLGTDYPTAMTPT*SPR	4	1402.37							26286												80.4386												3.6542
718	716	Adaptor/scaffold	Dlg4;Dlg4;Dlg4	PSD-95;PSD-95 iso 2;PSD-95 iso 3	264, 289;307, 332;261, 286	Disks large homolog 4	Q62108;Q62108-2;Q62108-3	http://www.phosphosite.org/proteinAction.do?id=7101&showAllSites=true	80.4	PPDITTSySQHLDNE;YPTAMTPtSPRRYSP			VAKPSNAYLSDSYAPPDITTSY*SQHLDNEISHSSYLGTDYPTAMTPT*SPR	5	1122.1					26784												80.5589												4.8018
719	717	Adaptor/scaffold	Dlg4;Dlg4;Dlg4	PSD-95;PSD-95 iso 2;PSD-95 iso 3	265, §290;308, 333;262, 287	Disks large homolog 4	Q62108;Q62108-2;Q62108-3	http://www.phosphosite.org/proteinAction.do?id=7101&showAllSites=true	80.4	PDITTSYsQHLDNEI;PTAMTPTsPRRYSPV			VAKPSNAYLSDSYAPPDITTSYS*QHLDNEISHSSYLGTDYPTAMTPTS*PR	4	1402.37	26550									26645			80.5989									80.3972			3.4721									3.3985
720	718	Adaptor/scaffold	Dlg4;Dlg4;Dlg4	PSD-95;PSD-95 iso 2;PSD-95 iso 3	265;308;262	Disks large homolog 4	Q62108;Q62108-2;Q62108-3	http://www.phosphosite.org/proteinAction.do?id=7101&showAllSites=true	80.4	PDITTSYsQHLDNEI			VAKPSNAYLSDSYAPPDITTSYS*QHLDNEISHSSYLGTDYPTAMTPTSPR	5	1106.11		25709		25240										76.977		77.0507										6.8288		5.5847
721	719	Adaptor/scaffold	Dlg4;Dlg4;Dlg4	PSD-95;PSD-95 iso 2;PSD-95 iso 3	277, §290;320, 333;274, 287	Disks large homolog 4	Q62108;Q62108-2;Q62108-3	http://www.phosphosite.org/proteinAction.do?id=7101&showAllSites=true	80.4	NEISHSSyLGTDYPT;PTAMTPTsPRRYSPV			VAKPSNAYLSDSYAPPDITTSYSQHLDNEISHSSY*LGTDYPTAMTPTS*PR	4	1402.37							26270												80.3961												5.5237
722	720	Adaptor/scaffold	Dlg4;Dlg4;Dlg4	PSD-95;PSD-95 iso 2;PSD-95 iso 3	277, §290;320, 333;274, 287	Disks large homolog 4	Q62108;Q62108-2;Q62108-3	http://www.phosphosite.org/proteinAction.do?id=7101&showAllSites=true	80.4	NEISHSSyLGTDYPT;PTAMTPTsPRRYSPV			VAKPSNAYLSDSYAPPDITTSYSQHLDNEISHSSY*LGTDYPTAMTPTS*PR	5	1122.1										26199												79.1788												4.0685
723	721	Adaptor/scaffold	Dlg4;Dlg4;Dlg4	PSD-95;PSD-95 iso 2;PSD-95 iso 3	277;320;274	Disks large homolog 4	Q62108;Q62108-2;Q62108-3	http://www.phosphosite.org/proteinAction.do?id=7101&showAllSites=true	80.4	NEISHSSyLGTDYPT			VAKPSNAYLSDSYAPPDITTSYSQHLDNEISHSSY*LGTDYPTAMTPTSPR	5	1106.11											25553												77.2869
724	722	Adaptor/scaffold	Dlg4;Dlg4;Dlg4	PSD-95;PSD-95 iso 2;PSD-95 iso 3	397;440;394	Disks large homolog 4	Q62108;Q62108-2;Q62108-3	http://www.phosphosite.org/proteinAction.do?id=7101&showAllSites=true	80.4	AQYKPEEySRFEAKI			NAGQTVTIIAQYKPEEY*SR	3	750.026	20542	20730	20288	20265	20645	20519	20157	20439	20406	20438	20548	20200	64.35	63.6636	64.063	63.6752	64.0812	63.6547	63.9866	63.7423	63.9097	63.7531	63.8474	63.7896	3.6591	5.3957	4.9941	5.2193	5.0259	5.6833	4.8808	5.4242	4.5841	5.0773
725	723	Adaptor/scaffold	Dlg4;Dlg4;Dlg4	PSD-95;PSD-95 iso 2;PSD-95 iso 3	397;440;394	Disks large homolog 4	Q62108;Q62108-2;Q62108-3	http://www.phosphosite.org/proteinAction.do?id=7101&showAllSites=true	80.4	AQYKPEEySRFEAKI			NAGQTVTIIAQYKPEEY*SR	3	750.026								20500												63.9086												3.811
726	724	Adaptor/scaffold	Dlg4;Dlg4;Dlg4	PSD-95;PSD-95 iso 2;PSD-95 iso 3	397;440;394	Disks large homolog 4	Q62108;Q62108-2;Q62108-3	http://www.phosphosite.org/proteinAction.do?id=7101&showAllSites=true	80.4	AQYKPEEySRFEAKI			NAGQTVTIIAQYKPEEY*SRFEAK	3	908.441	21260	21358	20956	20904	21312	21187	20812	21098	21080	21135	21238	20861	66.2727	65.3656	65.8468	65.4034	65.8835	65.4279	65.7352	65.5257	65.7082	65.6375	65.6871	65.5554	3.7724	5.6295	6.1525	3.9303	6.4373	6.9602	5.107	6.0319	5.9011	6.9897
727	725	Adaptor/scaffold	Dlg4;Dlg4;Dlg4	PSD-95;PSD-95 iso 2;PSD-95 iso 3	397;440;394	Disks large homolog 4	Q62108;Q62108-2;Q62108-3	http://www.phosphosite.org/proteinAction.do?id=7101&showAllSites=true	80.4	AQYKPEEySRFEAKI			NAGQTVTIIAQYKPEEY*SRFEAK	3	908.441	21214	21366						21149					66.1516	65.3866						65.6681					5.0216	6.5414						3.3999
728	726	Adaptor/scaffold	Dlg4;Dlg4;Dlg4	PSD-95;PSD-95 iso 2;PSD-95 iso 3	397;440;394	Disks large homolog 4	Q62108;Q62108-2;Q62108-3	http://www.phosphosite.org/proteinAction.do?id=7101&showAllSites=true	80.4	AQYKPEEySRFEAKI			NAGQTVTIIAQYKPEEY*SRFEAK	4	681.582	21211		20942	20977	21311	21202	20813	21100	21076	21121	21228	20868	66.1422		65.8069	65.6088	65.8791	65.4722	65.7375	65.5304	65.6985	65.5978	65.6586	65.5725	4.0751		4.3781	3.6078	6.1178	6.1039	5.9203	6.4133	5.1445	5.3511
729	727	Adaptor/scaffold	Dlg4;Dlg4;Dlg4	PSD-95;PSD-95 iso 2;PSD-95 iso 3	397;440;394	Disks large homolog 4	Q62108;Q62108-2;Q62108-3	http://www.phosphosite.org/proteinAction.do?id=7101&showAllSites=true	80.4	AQYKPEEySRFEAKI			NAGQTVTIIAQYKPEEY*SRFEAK	4	681.582				20930	21354	21194				21151						65.4775	65.9958	65.4489				65.6783						6.2065	3.5393	6.2914				3.7305
730	728	Adaptor/scaffold	Dlg4;Dlg4;Dlg4	PSD-95;PSD-95 iso 2;PSD-95 iso 3	397;440;394	Disks large homolog 4	Q62108;Q62108-2;Q62108-3	http://www.phosphosite.org/proteinAction.do?id=7101&showAllSites=true	80.4	AQYKPEEySRFEAKI			NAGQTVTIIAQYKPEEY*SRFEAK	4	681.582				20935												65.4926												5.5263
731	729	Adaptor/scaffold	Dlg4;Dlg4;Dlg4	PSD-95;PSD-95 iso 2;PSD-95 iso 3	533;576;530	Disks large homolog 4	Q62108;Q62108-2;Q62108-3	http://www.phosphosite.org/proteinAction.do?id=7101&showAllSites=true	80.4	VTQMEVHyARPIIIL			AKDWGSSSGSQGREDSVLSYETVTQMEVHY*ARPIIILGPTK	5	915.447							28174												85.4954												2.9781
732	730	Adaptor/scaffold	Dlg4;Dlg4;Dlg4	PSD-95;PSD-95 iso 2;PSD-95 iso 3	573;616;570	Disks large homolog 4	Q62108;Q62108-2;Q62108-3	http://www.phosphosite.org/proteinAction.do?id=7101&showAllSites=true	80.4	TTRPKREyEIDGRDY			ANDDLLSEFPDKFGSCVPHTTRPKREY*EIDGR	5	766.759	22120		21851	21715							22095	21701	68.6292		68.2757	67.5828							68.0038	67.831	1.4636		2.5796	3.5581
733	731	Adaptor/scaffold	Dlg4;Dlg4;Dlg4	PSD-95;PSD-95 iso 2;PSD-95 iso 3	573;616;570	Disks large homolog 4	Q62108;Q62108-2;Q62108-3	http://www.phosphosite.org/proteinAction.do?id=7101&showAllSites=true	80.4	TTRPKREyEIDGRDY			ANDDLLSEFPDKFGSCVPHTTRPKREY*EIDGR	5	766.759			21844												68.2568												2.0279
734	732	Adaptor/scaffold	Dlg4;Dlg4;Dlg4	PSD-95;PSD-95 iso 2;PSD-95 iso 3	573;616;570	Disks large homolog 4	Q62108;Q62108-2;Q62108-3	http://www.phosphosite.org/proteinAction.do?id=7101&showAllSites=true	80.4	TTRPKREyEIDGRDY			REY*EIDGR	2	559.237		7350		6911		7087			6999			6811		27.6664		27.6686		27.7093			27.7588			27.722		1.8541		1.4968		1.9639			1.768
735	733	Adaptor/scaffold	Dlg4;Dlg4;Dlg4	PSD-95;PSD-95 iso 2;PSD-95 iso 3	573;616;570	Disks large homolog 4	Q62108;Q62108-2;Q62108-3	http://www.phosphosite.org/proteinAction.do?id=7101&showAllSites=true	80.4	TTRPKREyEIDGRDY			REY*EIDGRDYHFVSSR	4	527.985		14899										14426		47.9812										48.2366		2.4733
736	734	Adaptor/scaffold	Dlg4;Dlg4;Dlg4	PSD-95;PSD-95 iso 2;PSD-95 iso 3	609;652;§606	Disks large homolog 4	Q62108;Q62108-2;Q62108-3	http://www.phosphosite.org/proteinAction.do?id=7101&showAllSites=true	80.4	GQYNSHLyGTSVQSV			FIEAGQYNSHLY*GTSVQSVR	3	779.362	19140	19315	18852	18863	19218	19127	18734	19052	18992	19056	19149	18796	60.5242	59.8794	60.1767	59.9121	60.2529	59.9208	60.1784	60.0217	60.1311	60.059	60.0949	60.0525	5.3544	5.2422	5.4987	5.0387	5.6119	5.1414	4.8959	5.431	5.5713	5.1524
737	735	Adaptor/scaffold	Dlg5	DLG5	§429	Disks large homolog 5	E9Q9R9	http://www.phosphosite.org/proteinAction.do?id=17215&showAllSites=true	214.3	KEERDAVySEYKLIM			DAVY*SEYK	2	527.71								10401		10416	10523	10154								36.7573		36.7627	36.7531	36.7866								1.647		1.5828
738	736	Adaptor/scaffold	Dlg5	DLG5	§429	Disks large homolog 5	E9Q9R9	http://www.phosphosite.org/proteinAction.do?id=17215&showAllSites=true	214.3	KEERDAVySEYKLIM			ESEKYKEERDAVY*SEYK	3	744.995		10620									10425			36.5093									36.4937			1.2325
739	737	Adaptor/scaffold	Dlg5	DLG5	§429	Disks large homolog 5	E9Q9R9	http://www.phosphosite.org/proteinAction.do?id=17215&showAllSites=true	214.3	KEERDAVySEYKLIM			YKEERDAVY*SEYK	3	587.257												8873												33.3209
740	738	Adaptor/scaffold	Dlg5	DLG5	430	Disks large homolog 5	E9Q9R9	http://www.phosphosite.org/proteinAction.do?id=17215&showAllSites=true	214.3	EERDAVYsEYKLIMS			DAVYS*EYK	2	527.71		10741												36.8393												1.4173
741	739	Adaptor/scaffold	Dlgap3	SAPAP3	§185, 194	Disks large-associated protein 3	Q6PFD5	http://www.phosphosite.org/proteinAction.do?id=8278&showAllSites=true	105.8	KLFAKSHsLEAPGKR;EAPGKRDyNGPKADG			SHS*LEAPGKRDY*NGPK	3	639.275						6681												26.6172												1.0058
742	740	Adaptor/scaffold	Dlgap3	SAPAP3	§363	Disks large-associated protein 3	Q6PFD5	http://www.phosphosite.org/proteinAction.do?id=8278&showAllSites=true	105.8	TKAKARTyHYLQVPQ			ARTY*HYLQVPQDDWGGYPTGGK	3	863.723	21159	21149		20705	21145	20955	20604	20888	20890	20911	21012	20652	66.0041	64.8029		64.856	65.4301	64.8107	65.1713	64.9391	65.2003	65.0194	65.0796	64.9954	2.13	5.7061		5.3936	5.352	5.7274	5.2194	5.2867	5.314	5.7388
743	741	Adaptor/scaffold	Dlgap3	SAPAP3	§363	Disks large-associated protein 3	Q6PFD5	http://www.phosphosite.org/proteinAction.do?id=8278&showAllSites=true	105.8	TKAKARTyHYLQVPQ			ARTY*HYLQVPQDDWGGYPTGGK	3	863.723	21020				21111								65.6314				65.3362								4.7034				5.7357
744	742	Adaptor/scaffold	Dlgap3	SAPAP3	§363	Disks large-associated protein 3	Q6PFD5	http://www.phosphosite.org/proteinAction.do?id=8278&showAllSites=true	105.8	TKAKARTyHYLQVPQ			ARTY*HYLQVPQDDWGGYPTGGKDGEIPCR	4	854.884	20646		20394		20774	20613	20274	20591	20546		20676	20283	64.6304		64.3471		64.4232	63.9052	64.2983	64.1536	64.283		64.1874	64.0121	3.9703		3.5059		5.3381	5.8519	4.5379	3.9932	3.4999
745	743	Adaptor/scaffold	Dlgap3	SAPAP3	§363	Disks large-associated protein 3	Q6PFD5	http://www.phosphosite.org/proteinAction.do?id=8278&showAllSites=true	105.8	TKAKARTyHYLQVPQ			ARTY*HYLQVPQDDWGGYPTGGKDGEIPCRR	4	893.91	19103	19145	18786	18763	19191	18958	18639		18930	18922	19041	18748	60.4209	59.4232	60.0017	59.6391	60.1833	59.4711	59.9256		59.9668	59.7005	59.8043	59.9235	4.8719	5.5651	5.9792	5.4908	4.7286	6.2306	5.6372		3.413	5.5445
746	744	Adaptor/scaffold	Dlgap3	SAPAP3	§363	Disks large-associated protein 3	Q6PFD5	http://www.phosphosite.org/proteinAction.do?id=8278&showAllSites=true	105.8	TKAKARTyHYLQVPQ			ARTY*HYLQVPQDDWGGYPTGGKDGEIPCRR	4	893.91	19076	19343	18794	18721	19117						19066		60.3452	59.9561	60.0228	59.528	59.9796						59.8725		4.8721	3.9622	5.3844	4.9285	5.4149
747	745	Adaptor/scaffold	Dlgap3	SAPAP3	§363	Disks large-associated protein 3	Q6PFD5	http://www.phosphosite.org/proteinAction.do?id=8278&showAllSites=true	105.8	TKAKARTyHYLQVPQ			ARTY*HYLQVPQDDWGGYPTGGKDGEIPCRR	4	893.91					19173												60.1308												5.7217
748	746	Adaptor/scaffold	Dlgap3	SAPAP3	§363	Disks large-associated protein 3	Q6PFD5	http://www.phosphosite.org/proteinAction.do?id=8278&showAllSites=true	105.8	TKAKARTyHYLQVPQ			ARTY*HYLQVPQDDWGGYPTGGKDGEIPCRR	5	715.329	19303	19155		18726			18655	18937	18891	18934			60.9632	59.4494		59.54			59.9682	59.7112	59.8631	59.7337			2.2593	6.2762		7.2645			6.6987	7.3271	6.1171	6.809
749	747	Adaptor/scaffold	Dlgap3	SAPAP3	§363	Disks large-associated protein 3	Q6PFD5	http://www.phosphosite.org/proteinAction.do?id=8278&showAllSites=true	105.8	TKAKARTyHYLQVPQ			ARTY*HYLQVPQDDWGGYPTGGKDGEIPCRR	5	715.329		19197												59.5609												5.4242
750	748	Adaptor/scaffold	Dlgap3	SAPAP3	§363	Disks large-associated protein 3	Q6PFD5	http://www.phosphosite.org/proteinAction.do?id=8278&showAllSites=true	105.8	TKAKARTyHYLQVPQ			TY*HYLQVPQDDWGGYPTGGK	3	788.011	23182	23395	22916	22956	23298			23116		23123	23172	22809	71.5073	70.8063	71.1569	70.9215	71.213			70.9292		70.9552	70.9176	70.7994	2.9924	4.5633	3.0673	3.5294	3.4693			3.8172		4.5219
751	749	Adaptor/scaffold	Dlgap3	SAPAP3	§363	Disks large-associated protein 3	Q6PFD5	http://www.phosphosite.org/proteinAction.do?id=8278&showAllSites=true	105.8	TKAKARTyHYLQVPQ			TY*HYLQVPQDDWGGYPTGGK	3	788.011			22963		23307						23185				71.2826		71.2389						70.951				3.223		3.0866
752	750	Adaptor/scaffold	Dlgap3	SAPAP3	§363	Disks large-associated protein 3	Q6PFD5	http://www.phosphosite.org/proteinAction.do?id=8278&showAllSites=true	105.8	TKAKARTyHYLQVPQ			TY*HYLQVPQDDWGGYPTGGKDGEIPCRR	4	837.125	20549	20655	20281	20207	20647	20446	20086	20395	20387	20391	20527	20123	64.3689	63.4621	64.0439	63.5199	64.0861	63.4616	63.7964	63.6245	63.8598	63.6263	63.7834	63.5847	3.3201	5.4067	3.2465	4.5228	3.9953	4.8555	4.016	5.0163	4.1261	4.5921
753	751	Adaptor/scaffold	Dlgap3	SAPAP3	§363	Disks large-associated protein 3	Q6PFD5	http://www.phosphosite.org/proteinAction.do?id=8278&showAllSites=true	105.8	TKAKARTyHYLQVPQ			TY*HYLQVPQDDWGGYPTGGKDGEIPCRR	4	837.125			20277	20258	20639		20146					20144			64.032	63.6565	64.0648		63.9558					63.6414			3.3611	3.8298	3.9351		3.9359
754	752	Adaptor/scaffold	Dlgap3	SAPAP3	§712, 722	Disks large-associated protein 3	Q6PFD5	http://www.phosphosite.org/proteinAction.do?id=8278&showAllSites=true	105.8	RSFQRHAsEPQPGPR;QPGPRAPtYSVFRTV			HAS*EPQPGPRAPT*YSVFR	3	719.649		18146		17697		17971	17624	17897		17904	18010	17638		56.7483		56.7807		56.8449	57.1809	56.9055		56.9692	57.0246	56.943		2.0863		2.0533		2.5252	1.7407	2.0517		2.4885
755	753	Adaptor/scaffold	Dlgap3	SAPAP3	§712, 722	Disks large-associated protein 3	Q6PFD5	http://www.phosphosite.org/proteinAction.do?id=8278&showAllSites=true	105.8	RSFQRHAsEPQPGPR;QPGPRAPtYSVFRTV			HAS*EPQPGPRAPT*YSVFR	3	719.649										17938		17634										57.0659		56.9309										1.3911
756	754	Adaptor/scaffold	Dlgap3	SAPAP3	§712, 724	Disks large-associated protein 3	Q6PFD5	http://www.phosphosite.org/proteinAction.do?id=8278&showAllSites=true	105.8	RSFQRHAsEPQPGPR;GPRAPTYsVFRTVHT			HAS*EPQPGPRAPTYS*VFR	3	719.649	18064		17773		18117				17875				57.5835		57.2824		57.3083				57.1399				1.4378		1.5166		1.7877				2.2049
757	755	Adaptor/scaffold	Dlgap3	SAPAP3	142	Disks large-associated protein 3	Q6PFD5	http://www.phosphosite.org/proteinAction.do?id=8278&showAllSites=true	105.8	DGFHTLPyQRGPAGP			QLPVQQDGFHTLPY*QR	3	669.654	20309	20487	20064	20026	20411	20309	19955	20213	20181	20207	20333	19978	63.7122	63.0176	63.4676	63.0314	63.4555	63.0981	63.4497	63.1395	63.3108	63.1388	63.2688	63.2051	2.6496	3.3496	3.6452	2.6257	3.5915	3.3322	3.645	3.543	2.946	3.4456
758	756	Adaptor/scaffold	Dlgap3	SAPAP3	142	Disks large-associated protein 3	Q6PFD5	http://www.phosphosite.org/proteinAction.do?id=8278&showAllSites=true	105.8	DGFHTLPyQRGPAGP			QLPVQQDGFHTLPY*QR	3	669.654			20058												63.451												2.4473
759	757	Adaptor/scaffold	Dlgap3	SAPAP3	142	Disks large-associated protein 3	Q6PFD5	http://www.phosphosite.org/proteinAction.do?id=8278&showAllSites=true	105.8	DGFHTLPyQRGPAGP			QLPVQQDGFHTLPY*QRGPAGPGPGPGSGAAPEAR	4	873.422												19238												61.2361
760	758	Adaptor/scaffold	Dlgap3	SAPAP3	293	Disks large-associated protein 3	Q6PFD5	http://www.phosphosite.org/proteinAction.do?id=8278&showAllSites=true	105.8	CLDAPDGsYRDLSFK			ATGWWSSDDNLDSDSGFLGGRPPGEPGGPFCLDAPDGS*YRDLSFK	4	1221.53									32310												95.8468												1.8596
761	759	Adaptor/scaffold	Dlgap3	SAPAP3	294	Disks large-associated protein 3	Q6PFD5	http://www.phosphosite.org/proteinAction.do?id=8278&showAllSites=true	105.8	LDAPDGSyRDLSFKG			ATGWWSSDDNLDSDSGFLGGRPPGEPGGPFCLDAPDGSY*RDLSFK	4	1221.53		32640												95.5862												2.3875
762	760	Adaptor/scaffold	Dlgap3	SAPAP3	33	Disks large-associated protein 3	Q6PFD5	http://www.phosphosite.org/proteinAction.do?id=8278&showAllSites=true	105.8	GPAARAPyLLGSREA			APY*LLGSR	2	478.734		19408												60.1287												1.3729
763	761	Adaptor/scaffold	Dlgap3	SAPAP3	362	Disks large-associated protein 3	Q6PFD5	http://www.phosphosite.org/proteinAction.do?id=8278&showAllSites=true	105.8	ETKAKARtYHYLQVP			ART*YHYLQVPQDDWGGYPTGGK	3	863.723			20725		21286	21174					21127				65.2276		65.8142	65.3936					65.384				4.2386		2.384	2.6725
764	762	Adaptor/scaffold	Dlgap3	SAPAP3	362	Disks large-associated protein 3	Q6PFD5	http://www.phosphosite.org/proteinAction.do?id=8278&showAllSites=true	105.8	ETKAKARtYHYLQVP			ART*YHYLQVPQDDWGGYPTGGKDGEIPCR	4	854.884		20867												64.0303												4.54
765	763	Adaptor/scaffold	Dlgap3	SAPAP3	362	Disks large-associated protein 3	Q6PFD5	http://www.phosphosite.org/proteinAction.do?id=8278&showAllSites=true	105.8	ETKAKARtYHYLQVP			ART*YHYLQVPQDDWGGYPTGGKDGEIPCRR	4	893.91								18902	18893											59.6178	59.8699											5.0661	5.4081
766	764	Adaptor/scaffold	Dlgap3	SAPAP3	362	Disks large-associated protein 3	Q6PFD5	http://www.phosphosite.org/proteinAction.do?id=8278&showAllSites=true	105.8	ETKAKARtYHYLQVP			ART*YHYLQVPQDDWGGYPTGGKDGEIPCRR	5	715.329	19101		18791		19168	18942			19111		19052	18681	60.414		60.0156		60.1166	59.4279			60.4487		59.8305	59.7441	6.5139		6.9396		7.3661	7.3351			2.38
767	765	Adaptor/scaffold	Dlgap3	SAPAP3	362	Disks large-associated protein 3	Q6PFD5	http://www.phosphosite.org/proteinAction.do?id=8278&showAllSites=true	105.8	ETKAKARtYHYLQVP			ART*YHYLQVPQDDWGGYPTGGKDGEIPCRR	5	715.329			18833		19146							18687			60.1246		60.0555							59.7584			5.8932		6.4472
768	766	Adaptor/scaffold	Dlgap3	SAPAP3	362	Disks large-associated protein 3	Q6PFD5	http://www.phosphosite.org/proteinAction.do?id=8278&showAllSites=true	105.8	ETKAKARtYHYLQVP			T*YHYLQVPQDDWGGYPTGGK	3	788.011							22813		23017										71.1055		70.9232										3.7264		3.2618
769	767	Adaptor/scaffold	Dlgap3	SAPAP3	365	Disks large-associated protein 3	Q6PFD5	http://www.phosphosite.org/proteinAction.do?id=8278&showAllSites=true	105.8	AKARTYHyLQVPQDD			ARTYHY*LQVPQDDWGGYPTGGK	3	863.723		21348												65.3356												2.8934
770	768	Adaptor/scaffold	Dlgap3	SAPAP3	365	Disks large-associated protein 3	Q6PFD5	http://www.phosphosite.org/proteinAction.do?id=8278&showAllSites=true	105.8	AKARTYHyLQVPQDD			ARTYHY*LQVPQDDWGGYPTGGKDGEIPCRR	5	715.329	19195	19349					18712	18894	19103		19138		60.6723	59.9727					60.1213	59.5968	60.427		60.0663		2.6515	5.0896					2.9394	5.7496	2.8603
771	769	Adaptor/scaffold	Dlgap3	SAPAP3	365	Disks large-associated protein 3	Q6PFD5	http://www.phosphosite.org/proteinAction.do?id=8278&showAllSites=true	105.8	AKARTYHyLQVPQDD			TYHY*LQVPQDDWGGYPTGGK	3	788.011	23293									23189			71.8338									71.1284			1.5793									4.0766
772	770	Adaptor/scaffold	Dlgap3	SAPAP3	365	Disks large-associated protein 3	Q6PFD5	http://www.phosphosite.org/proteinAction.do?id=8278&showAllSites=true	105.8	AKARTYHyLQVPQDD			TYHY*LQVPQDDWGGYPTGGK	3	788.011	23180												71.5025												3.0599
773	771	Adaptor/scaffold	Dlgap3	SAPAP3	365	Disks large-associated protein 3	Q6PFD5	http://www.phosphosite.org/proteinAction.do?id=8278&showAllSites=true	105.8	AKARTYHyLQVPQDD			TYHY*LQVPQDDWGGYPTGGKDGEIPCRR	4	837.125		20753												63.725												4.8132
774	772	Adaptor/scaffold	Dlgap3	SAPAP3	723	Disks large-associated protein 3	Q6PFD5	http://www.phosphosite.org/proteinAction.do?id=8278&showAllSites=true	105.8	PGPRAPTySVFRTVH			APTY*SVFR	2	510.731	17341	17261	17019	16815	17154	17055	16888	16992	16930	16970	17310	16926	55.5668	54.3861	55.2318	54.4172	54.7172	54.3934	55.1557	54.4879	54.6034	54.4671	55.1268	55.03	2.3916	2.4725	1.7881	2.6077	2.2317	2.5562	1.447	2.5445	2.3588	2.6103
775	773	Adaptor/scaffold	Dlgap3	SAPAP3	723	Disks large-associated protein 3	Q6PFD5	http://www.phosphosite.org/proteinAction.do?id=8278&showAllSites=true	105.8	PGPRAPTySVFRTVH			APTY*SVFR	2	510.731	17149	17482	16827		17356		16695				17104	16722	55.0449	54.9686	54.7079		55.2602		54.629				54.5815	54.4872	2.4805	1.5431	2.2248		1.8496		2.2827
776	774	Adaptor/scaffold	Dlgap3	SAPAP3	723	Disks large-associated protein 3	Q6PFD5	http://www.phosphosite.org/proteinAction.do?id=8278&showAllSites=true	105.8	PGPRAPTySVFRTVH			HASEPQPGPRAPTY*SVFR	3	692.993			15748												51.7698												2.0004
777	775	Adaptor/scaffold	Dlgap3	SAPAP3	723	Disks large-associated protein 3	Q6PFD5	http://www.phosphosite.org/proteinAction.do?id=8278&showAllSites=true	105.8	PGPRAPTySVFRTVH			TY*SVFR	2	426.686	15692	15747	15355	15285	15630	15506	15192	15470	15436	15492	15605	15219	50.9008	50.2725	50.594	50.2212	50.6068	50.2426	50.4981	50.3467	50.4559	50.4003	50.4166	50.3549	1.9137	1.9479	1.9016	1.7608	2.0459	1.6701	1.9394	1.9199	2.0682	1.9209
778	776	Adaptor/scaffold	Dlgap3;Xpo4	SAPAP3;Exportin-4	452;598	Disks large-associated protein 3	Q6PFD5;Q9ESJ0	http://www.phosphosite.org/proteinAction.do?id=8278&showAllSites=true	105.8	PRSSIPGySRSLTTG			SSIPGY*SR	2	473.705	9666		9335		9533		9140			9463	9610		34.4944		34.3119		34.2571		34.2259			34.1818	34.2868		1.1334		1.0952		1.4649		1.3065			1.3725
779	777	Adaptor/scaffold	Dlgap3;Xpo4	SAPAP3;Exportin-4	453;599	Disks large-associated protein 3	Q6PFD5;Q9ESJ0	http://www.phosphosite.org/proteinAction.do?id=8278&showAllSites=true	105.8	RSSIPGYsRSLTTGQ			SSIPGYS*R	2	473.705									9391			9186									34.2322			34.1696									1.207
780	778	Adaptor/scaffold	Dlgap4;Dlgap4	SAPAP4;SAPAP4 iso2	§13, 32;13, 32	Disks large-associated protein 4	B1AZP2;B1AZP2-2	http://www.phosphosite.org/proteinAction.do?id=6708&showAllSites=true	108	DSRPRHLsDSLDPPH;AGPDRNPyLLSPTEA			HLS*DSLDPPHEPLFAGPDRNPY*LLSPTEAFAR	4	930.679	29576	29810	29369	29320	29302	29675	29270	29550		29571			88.792	87.9754	88.5701	88.0025	87.3019	88.0869	88.4405	88.1554		88.2088			2.747	4.7749	2.1926	3.0248	2.187	3.9743	3.3877	4.3118		4.2
781	779	Adaptor/scaffold	Dlgap4;Dlgap4	SAPAP4;SAPAP4 iso2	§13, 32;13, 32	Disks large-associated protein 4	B1AZP2;B1AZP2-2	http://www.phosphosite.org/proteinAction.do?id=6708&showAllSites=true	108	DSRPRHLsDSLDPPH;AGPDRNPyLLSPTEA			HLS*DSLDPPHEPLFAGPDRNPY*LLSPTEAFAR	4	930.679		29784			29781	29651				29610				87.9045			88.5789	88.0226				88.3132				4.5717			2.7951	4.9654				2.4184
782	780	Adaptor/scaffold	Dlgap4;Dlgap4	SAPAP4;SAPAP4 iso2	§13, 32;13, 32	Disks large-associated protein 4	B1AZP2;B1AZP2-2	http://www.phosphosite.org/proteinAction.do?id=6708&showAllSites=true	108	DSRPRHLsDSLDPPH;AGPDRNPyLLSPTEA			HLS*DSLDPPHEPLFAGPDRNPY*LLSPTEAFAR	4	930.679					29759												88.5177												4.743
783	781	Adaptor/scaffold	Dlgap4;Dlgap4	SAPAP4;SAPAP4 iso2	§15, 32;15, 32	Disks large-associated protein 4	B1AZP2;B1AZP2-2	http://www.phosphosite.org/proteinAction.do?id=6708&showAllSites=true	108	RPRHLSDsLDPPHEP;AGPDRNPyLLSPTEA			HLSDS*LDPPHEPLFAGPDRNPY*LLSPTEAFAR	4	930.679		29337							29548		29158	28830		86.7164							88.4242		87.0017	86.9462		3.8171							2.1099
784	782	Adaptor/scaffold	Dlgap4;Dlgap4	SAPAP4;SAPAP4 iso2	240;240	Disks large-associated protein 4	B1AZP2;B1AZP2-2	http://www.phosphosite.org/proteinAction.do?id=6708&showAllSites=true	108	QERTQPRyFMHAYNT			Y*FMHAYNTISGHMLK	3	631.612		21306	20980		21324						21218	20852		65.2224	65.9085		65.9146						65.632	65.5318		3.7579	1.2646		2.6643
785	783	Adaptor/scaffold	Dlgap4;Dlgap4	SAPAP4;SAPAP4 iso2	245;245	Disks large-associated protein 4	B1AZP2;B1AZP2-2	http://www.phosphosite.org/proteinAction.do?id=6708&showAllSites=true	108	PRYFMHAyNTISGHM			YFMHAY*NTISGHMLK	3	631.612	20302	20339				20182					20242	19881	63.6931	62.6233				62.7597					63.0272	62.9494	1.9403	4.5841				3.9224
786	784	Adaptor/scaffold	Dlgap4;Dlgap4	SAPAP4;SAPAP4 iso2	285;285	Disks large-associated protein 4	B1AZP2;B1AZP2-2	http://www.phosphosite.org/proteinAction.do?id=6708&showAllSites=true	108	SLGVGTDtNYVKRGS			NTTTELTAPPPPPAPPATCPSLGVGTDT*NYVK	3	1115.53	24141									24263			74.1072									73.9873			3.2757									4.2123
787	785	Adaptor/scaffold	Dlgap4;Dlgap4	SAPAP4;SAPAP4 iso2	285;285	Disks large-associated protein 4	B1AZP2;B1AZP2-2	http://www.phosphosite.org/proteinAction.do?id=6708&showAllSites=true	108	SLGVGTDtNYVKRGS			NTTTELTAPPPPPAPPATCPSLGVGTDT*NYVKR	3	1167.56			21846	21882								21874			68.2615	68.0272								68.293			1.8466	2.8313
788	786	Adaptor/scaffold	Dlgap4;Dlgap4	SAPAP4;SAPAP4 iso2	285;285	Disks large-associated protein 4	B1AZP2;B1AZP2-2	http://www.phosphosite.org/proteinAction.do?id=6708&showAllSites=true	108	SLGVGTDtNYVKRGS			NTTTELTAPPPPPAPPATCPSLGVGTDT*NYVKR	4	875.925	22079			21917							22166		68.513			68.121							68.1947		5.7166			4.0074
789	787	Adaptor/scaffold	Dlgap4;Dlgap4	SAPAP4;SAPAP4 iso2	287;287	Disks large-associated protein 4	B1AZP2;B1AZP2-2	http://www.phosphosite.org/proteinAction.do?id=6708&showAllSites=true	108	GVGTDTNyVKRGSWS			NTTTELTAPPPPPAPPATCPSLGVGTDTNY*VK	3	1115.53		24542			24297	24340			24141	24306	24255	23942		73.8625			73.8817	73.8339			73.9318	74.1007	73.8256	73.8285		5.4393			3.8928	5.5364			3.7919	2.793
790	788	Adaptor/scaffold	Dlgap4;Dlgap4	SAPAP4;SAPAP4 iso2	287;287	Disks large-associated protein 4	B1AZP2;B1AZP2-2	http://www.phosphosite.org/proteinAction.do?id=6708&showAllSites=true	108	GVGTDTNyVKRGSWS			NTTTELTAPPPPPAPPATCPSLGVGTDTNY*VK	3	1115.53						24359			24105		24287							73.884			73.8366		73.9122							5.1148			4.495
791	789	Adaptor/scaffold	Dlgap4;Dlgap4	SAPAP4;SAPAP4 iso2	287;287	Disks large-associated protein 4	B1AZP2;B1AZP2-2	http://www.phosphosite.org/proteinAction.do?id=6708&showAllSites=true	108	GVGTDTNyVKRGSWS			NTTTELTAPPPPPAPPATCPSLGVGTDTNY*VKR	3	1167.56	22058	22357	21835	21873	22176	22119		22070	21993	22029	22132	21768	68.4561	68.0248	68.2329	68.0033	68.1926	67.9183		68.1317	68.182	68.035	68.1009	68.0088	2.8749	3.4921	2.2699	2.9168	4.073	4.2384		3.4848	4.2263	3.6943
792	790	Adaptor/scaffold	Dlgap4;Dlgap4	SAPAP4;SAPAP4 iso2	287;287	Disks large-associated protein 4	B1AZP2;B1AZP2-2	http://www.phosphosite.org/proteinAction.do?id=6708&showAllSites=true	108	GVGTDTNyVKRGSWS			NTTTELTAPPPPPAPPATCPSLGVGTDTNY*VKR	3	1167.56						22150			21971		22124							68.0017			68.1253		68.0795							4.7748			4.2033
793	791	Adaptor/scaffold	Dlgap4;Dlgap4	SAPAP4;SAPAP4 iso2	287;287	Disks large-associated protein 4	B1AZP2;B1AZP2-2	http://www.phosphosite.org/proteinAction.do?id=6708&showAllSites=true	108	GVGTDTNyVKRGSWS			NTTTELTAPPPPPAPPATCPSLGVGTDTNY*VKR	4	875.925	22042	22343			22167	22146	21735		22015		22148	21788	68.4135	67.9886			68.1688	67.9895	68.2253		68.2411		68.1448	68.0611	5.4116	7.8258			6.8869	7.9578	5.7495		6.4531
794	792	Adaptor/scaffold	Dlgap4;Dlgap4	SAPAP4;SAPAP4 iso2	287;287	Disks large-associated protein 4	B1AZP2;B1AZP2-2	http://www.phosphosite.org/proteinAction.do?id=6708&showAllSites=true	108	GVGTDTNyVKRGSWS			NTTTELTAPPPPPAPPATCPSLGVGTDTNY*VKR	4	875.925						22152						21794						68.0064						68.0777						7.9346
795	793	Adaptor/scaffold	Dlgap4;Dlgap4	SAPAP4;SAPAP4 iso2	32, §35;32, 35	Disks large-associated protein 4	B1AZP2;B1AZP2-2	http://www.phosphosite.org/proteinAction.do?id=6708&showAllSites=true	108	AGPDRNPyLLSPTEA;DRNPYLLsPTEAFAR			HLSDSLDPPHEPLFAGPDRNPY*LLS*PTEAFAR	4	930.679	28761	29065	28609	28590	29012		28511	28770	28744	28835	28922	28510	86.6169	85.9884	86.5066	86.0537	86.521		86.3968	86.0741	86.2662	86.2479	86.3675	86.0951	1.8233	3.7564	1.552	2.8464	2.0131		3.3407	4.3177	3.7889	3.2985
796	794	Adaptor/scaffold	Dlgap4;Dlgap4	SAPAP4;SAPAP4 iso2	32, §35;32, 35	Disks large-associated protein 4	B1AZP2;B1AZP2-2	http://www.phosphosite.org/proteinAction.do?id=6708&showAllSites=true	108	AGPDRNPyLLSPTEA;DRNPYLLsPTEAFAR			HLSDSLDPPHEPLFAGPDRNPY*LLS*PTEAFAR	4	930.679		29046												85.9385												4.4087
797	795	Adaptor/scaffold	Dlgap4;Dlgap4	SAPAP4;SAPAP4 iso2	328;328	Disks large-associated protein 4	B1AZP2;B1AZP2-2	http://www.phosphosite.org/proteinAction.do?id=6708&showAllSites=true	108	SCHQGLAyHYLQVPG			SCHQGLAY*HYLQVPGGGGEWSTTLLSPR	3	1051.15		28257			28178				27961	27990	28160	27801		83.8277			84.2929				84.176	83.9971	84.3059	84.1936		2.6393			3.7213				4.4085	5.2284
798	796	Adaptor/scaffold	Dlgap4;Dlgap4	SAPAP4;SAPAP4 iso2	328;328	Disks large-associated protein 4	B1AZP2;B1AZP2-2	http://www.phosphosite.org/proteinAction.do?id=6708&showAllSites=true	108	SCHQGLAyHYLQVPG			SCHQGLAY*HYLQVPGGGGEWSTTLLSPR	3	1051.15		28230									28080			83.7547									84.0922			6.5552
799	797	Adaptor/scaffold	Dlgap4;Dlgap4	SAPAP4;SAPAP4 iso2	328;328	Disks large-associated protein 4	B1AZP2;B1AZP2-2	http://www.phosphosite.org/proteinAction.do?id=6708&showAllSites=true	108	SCHQGLAyHYLQVPG			SCHQGLAY*HYLQVPGGGGEWSTTLLSPR	4	788.617	28059									28013	28086	27718	84.7421									84.0564	84.1091	83.9738	3.1897									4.9768
800	798	Adaptor/scaffold	Dlgap4;Dlgap4	SAPAP4;SAPAP4 iso2	328;328	Disks large-associated protein 4	B1AZP2;B1AZP2-2	http://www.phosphosite.org/proteinAction.do?id=6708&showAllSites=true	108	SCHQGLAyHYLQVPG			SKSCHQGLAY*HYLQVPGGGGEWSTTLLSPR	4	842.399												25753												78.673
801	799	Adaptor/scaffold	Dlgap4;Dlgap4	SAPAP4;SAPAP4 iso2	328;328	Disks large-associated protein 4	B1AZP2;B1AZP2-2	http://www.phosphosite.org/proteinAction.do?id=6708&showAllSites=true	108	SCHQGLAyHYLQVPG			SKSCHQGLAY*HYLQVPGGGGEWSTTLLSPR	4	842.399												25779												78.7394
802	800	Adaptor/scaffold	Dlgap4;Dlgap4	SAPAP4;SAPAP4 iso2	32;32	Disks large-associated protein 4	B1AZP2;B1AZP2-2	http://www.phosphosite.org/proteinAction.do?id=6708&showAllSites=true	108	AGPDRNPyLLSPTEA			HLSDSLDPPHEPLFAGPDRNPY*LLSPTEAFAR	4	910.687	27984		27799		28144		27661		27910		28031	27656	84.5406		84.3294		84.2042		84.1285		84.0393		83.9609	83.8088	4.967		4.3975		5.6891		5.424		4.7002
803	801	Adaptor/scaffold	Dlgap4;Dlgap4	SAPAP4;SAPAP4 iso2	32;32	Disks large-associated protein 4	B1AZP2;B1AZP2-2	http://www.phosphosite.org/proteinAction.do?id=6708&showAllSites=true	108	AGPDRNPyLLSPTEA			PPHEPLFAGPDRNPY*LLSPTEAFAR	3	958.132		27339										26859		81.3643										81.6208		1.7866
804	802	Adaptor/scaffold	Dlgap4;Dlgap4	SAPAP4;SAPAP4 iso2	330;330	Disks large-associated protein 4	B1AZP2;B1AZP2-2	http://www.phosphosite.org/proteinAction.do?id=6708&showAllSites=true	108	HQGLAYHyLQVPGGG			SCHQGLAYHY*LQVPGGGGEWSTTLLSPR	3	1051.15	28096									28048	28144		84.8379									84.1486	84.2633		2.811									3.9315
805	803	Adaptor/scaffold	Dlgap4;Dlgap4	SAPAP4;SAPAP4 iso2	330;330	Disks large-associated protein 4	B1AZP2;B1AZP2-2	http://www.phosphosite.org/proteinAction.do?id=6708&showAllSites=true	108	HQGLAYHyLQVPGGG			SCHQGLAYHY*LQVPGGGGEWSTTLLSPR	4	788.617									27987												84.245												4.4696
806	804	Adaptor/scaffold	Dlgap4;Dlgap4	SAPAP4;SAPAP4 iso2	330;330	Disks large-associated protein 4	B1AZP2;B1AZP2-2	http://www.phosphosite.org/proteinAction.do?id=6708&showAllSites=true	108	HQGLAYHyLQVPGGG			SKSCHQGLAYHY*LQVPGGGGEWSTTLLSPR	4	842.399		26154				26077					26101			78.1737				78.492					78.7571			3.3194				4.0023
807	805	Adaptor/scaffold	Dmxl2;Dmxl2	RC3;RC3 iso4	2919;2909	DmX-like protein 2	Q8BPN8;Q8BPN8-2	http://www.phosphosite.org/proteinAction.do?id=11324&showAllSites=true	338	ISGGRKGyICIFDIR			KGY*ICIFDIR	2	682.825	27451	27493	27196	27036	27559	27360	27087	27281	27299	27309	27429	27061	83.0868	81.7717	82.7189	81.8896	82.647	81.9275	82.5995	82.0942	82.402	82.1829	82.326	82.1745	2.0335	3.2032	2.844	3.6498	3.3351	3.709	1.875	3.1119	3.025	2.9663
808	806	Adaptor/scaffold	Dmxl2;Dmxl2	RC3;RC3 iso4	2919;2909	DmX-like protein 2	Q8BPN8;Q8BPN8-2	http://www.phosphosite.org/proteinAction.do?id=11324&showAllSites=true	338	ISGGRKGyICIFDIR			KGY*ICIFDIR	3	455.553		27510							27313	27329	27460	27073		81.8167							82.4389	82.2374	82.4067	82.2061		2.2417							1.6837	1.1043
809	807	Adaptor/scaffold	Dmxl2;Dmxl2;Dmxl2	RC3;RC3 iso4;RC3 iso4	§721;721;721	DmX-like protein 2	Q8BPN8;Q8BPN8-2;Q8BPN8-3	http://www.phosphosite.org/proteinAction.do?id=11324&showAllSites=true	338	FHDPNAIySELILWR			TFHDPNAIY*SELILWR	2	1027.99				31610								31599				94.1339								94.3693				1.3852
810	808	Adaptor/scaffold	Dmxl2;Dmxl2;Dmxl2	RC3;RC3 iso4;RC3 iso4	§721;721;721	DmX-like protein 2	Q8BPN8;Q8BPN8-2;Q8BPN8-3	http://www.phosphosite.org/proteinAction.do?id=11324&showAllSites=true	338	FHDPNAIySELILWR			TFHDPNAIY*SELILWR	3	685.663	31881	32064	31650	31588	32084	31930	31559	31814	31805	31843	31912	31574	95.1243	94.0368	94.7922	94.0765	94.7597	94.1342	94.6167	94.2276	94.4958	94.3165	94.4365	94.3043	3.4814	4.8512	3.8504	4.7431	4.8018	4.7423	4.5703	4.9378	4.8483	4.8212
811	809	Adaptor/scaffold	Dmxl2;Dmxl2;Dmxl2	RC3;RC3 iso4;RC3 iso4	113;113;113	DmX-like protein 2	Q8BPN8;Q8BPN8-2;Q8BPN8-3	http://www.phosphosite.org/proteinAction.do?id=11324&showAllSites=true	338	QFFLSSVtYNLAWDP			TGQFFLSSVT*YNLAWDPQDNR	3	847.048											36084												105.617
812	810	Adaptor/scaffold	Dmxl2;Dmxl2;Dmxl2	RC3;RC3 iso4;RC3 iso4	722;722;722	DmX-like protein 2	Q8BPN8;Q8BPN8-2;Q8BPN8-3	http://www.phosphosite.org/proteinAction.do?id=11324&showAllSites=true	338	HDPNAIYsELILWRV			TFHDPNAIYS*ELILWR	2	1027.99		32081												94.0856												1.9338
813	811	Adaptor/scaffold	Dock2	DOCK2	§212	Dedicator of cytokinesis protein 2	Q8C3J5	http://www.phosphosite.org/proteinAction.do?id=2749&showAllSites=true	211.6	DQPDYGVySRISSSP			IKEEMSKDQPDYGVY*SR	3	708.982												11170												39.5067
814	812	Adaptor/scaffold	Dock2	DOCK2	213	Dedicator of cytokinesis protein 2	Q8C3J5	http://www.phosphosite.org/proteinAction.do?id=2749&showAllSites=true	211.6	QPDYGVYsRISSSPT			IKEEMSKDQPDYGVYS*R	3	708.982	11674	11827					11130		11375	11488	11580		39.9434	39.7531					39.5941		39.5788	39.6357	39.5957		1.3453	3.263					1.0004		2.2146	1.7293
815	813	Adaptor/scaffold	Dok1	DOK1	§340	Docking protein 1	P97465	http://www.phosphosite.org/proteinAction.do?id=1526&showAllSites=true	52.4	KPLYWDLyGHVQQQL			KPLYWDLY*GHVQQQLLK	3	737.045		25661									25601	25209		76.8484									77.4126	77.217		2.2185
816	814	Adaptor/scaffold	Dok1	DOK1	§450	Docking protein 1	P97465	http://www.phosphosite.org/proteinAction.do?id=1526&showAllSites=true	52.4	FSSDTALySQVQKSG	PTP1B		GFSSDTALY*SQVQK	2	805.859									17645			17432									56.5251			56.3879									3.0313
817	815	Adaptor/scaffold	Dok3	DOK3	§343	Docking protein 3	Q9QZK7	http://www.phosphosite.org/proteinAction.do?id=7965&showAllSites=true	48	TGTAEHLyENVCMLE			HTGTAEHLY*ENVCMLEASPGLTNGGPEAQEGPPGGR	4	954.171		22498												68.403												2.6324
818	816	Adaptor/scaffold	Dok4	DOK4	165	Docking protein 4	Q99KE3	http://www.phosphosite.org/proteinAction.do?id=10747&showAllSites=true	37	QITHENIyLWDIHNP			LQITHENIY*LWDIHNPR	3	748.032	25546	25617	25275	25154	25631	25481	25154	25387	25400	25424	25523	25163	77.9192	76.7307	77.5519	76.82	77.4512	76.8969	77.4076	76.9924	77.2906	77.1	77.2084	77.0961	4.425	6.942	5.2167	6.3803	5.4349	6.6813	6.2512	7.4313	6.525	7.2197
819	817	Adaptor/scaffold	Dok4	DOK4	165	Docking protein 4	Q99KE3	http://www.phosphosite.org/proteinAction.do?id=10747&showAllSites=true	37	QITHENIyLWDIHNP			LQITHENIY*LWDIHNPR	3	748.032					25636												77.4656												6.2698
820	818	Adaptor/scaffold	Dok4	DOK4	165	Docking protein 4	Q99KE3	http://www.phosphosite.org/proteinAction.do?id=10747&showAllSites=true	37	QITHENIyLWDIHNP			LQITHENIY*LWDIHNPR	4	561.276				25168												76.8563												1.9258
821	819	Adaptor/scaffold	Efs	EFS	§121, §128	Embryonal Fyn-associated substrate	Q64355	http://www.phosphosite.org/proteinAction.do?id=5225&showAllSites=true	58.9	GLPARSCsPSSDSIY;SPSSDSIyKVPRGNG			SCS*PSSDSIY*KVPR	2	871.846												13923												46.8835
822	820	Adaptor/scaffold	Efs	EFS	§121, §128	Embryonal Fyn-associated substrate	Q64355	http://www.phosphosite.org/proteinAction.do?id=5225&showAllSites=true	58.9	GLPARSCsPSSDSIY;SPSSDSIyKVPRGNG			SCS*PSSDSIY*KVPR	3	581.567		14514	13964	14034	14278	14264	13825	14156	14103	14168	14301	13899		46.9461	46.854	46.8399	46.9646	46.9087	46.8331	46.8063	46.8989	46.8178	46.9245	46.8193		2.5823	1.2728	1.7587	1.8686	1.0389	1.5113	2.3458	1.7538	2.7925
823	821	Adaptor/scaffold	Efs	EFS	§121, §128	Embryonal Fyn-associated substrate	Q64355	http://www.phosphosite.org/proteinAction.do?id=5225&showAllSites=true	58.9	GLPARSCsPSSDSIY;SPSSDSIyKVPRGNG			SCS*PSSDSIY*KVPR	3	581.567		14520												46.9627												2.8916
824	822	Adaptor/scaffold	Efs	EFS	§128	Embryonal Fyn-associated substrate	Q64355	http://www.phosphosite.org/proteinAction.do?id=5225&showAllSites=true	58.9	SPSSDSIyKVPRGNG			SCSPSSDSIY*KVPR	2	831.863											12651												42.4863
825	823	Adaptor/scaffold	Efs	EFS	§128	Embryonal Fyn-associated substrate	Q64355	http://www.phosphosite.org/proteinAction.do?id=5225&showAllSites=true	58.9	SPSSDSIyKVPRGNG			SCSPSSDSIY*KVPR	3	554.911		12792												42.3417												2.8752
826	824	Adaptor/scaffold	Efs	EFS	119, §128	Embryonal Fyn-associated substrate	Q64355	http://www.phosphosite.org/proteinAction.do?id=5225&showAllSites=true	58.9	ASGLPARsCSPSSDS;SPSSDSIyKVPRGNG			S*CSPSSDSIY*KVPR	2	871.846									14098												46.8845												2.2983
827	825	Adaptor/scaffold	Efs	EFS	233	Embryonal Fyn-associated substrate	Q64355	http://www.phosphosite.org/proteinAction.do?id=5225&showAllSites=true	58.9	ASALLNLyEAPEELL			ASALLNLY*EAPEELLANGESR	3	780.709	34307	34781			34647				34399	34518			101.694	101.335			101.586				101.459	101.484			2.2969	4.3675			3.2773				3.6396	3.8408
828	826	Adaptor/scaffold	Efs	EFS	371	Embryonal Fyn-associated substrate	Q64355	http://www.phosphosite.org/proteinAction.do?id=5225&showAllSites=true	58.9	PAGPHNEyEGIPMAE			EVANDPAGPHNEY*EGIPMAEEYDYVHLK	3	1089.8								24197			24289	23936								73.8077			73.9194	73.8115								2.1024
829	827	Adaptor/scaffold	Efs	EFS	371	Embryonal Fyn-associated substrate	Q64355	http://www.phosphosite.org/proteinAction.do?id=5225&showAllSites=true	58.9	PAGPHNEyEGIPMAE			EVANDPAGPHNEY*EGIPMAEEYDYVHLK	4	817.605			24016								24328	23952			74.1486								74.0218	73.8549			1.6332
830	828	Adaptor/scaffold	Enah;Enah;Enah;Enah;Enah	Mena;Mena iso3;Mena iso4;Mena iso 5;Mena iso 6	38;38;38;38;38	Protein enabled homolog	Q03173;Q03173-3;Q03173-4;Q03173-5;Q03173-6	http://www.phosphosite.org/proteinAction.do?id=2818&showAllSites=true	85.8	GFSRVHIyHHTGNNT			VHIY*HHTGNNTFR	3	559.254		7580		7150		7388	7046				7464	7089		28.2877		28.3133		28.5104	28.5492				28.4853	28.4736		1.9229		2.0326		1.6639	1.3531
831	829	Adaptor/scaffold	Epb41l1;Epb41l1;Epb41l1	EPB41L1;EPB41L1 iso4;EPB41L1 iso4	§343;343;343	Band 4.1-like protein 1	Q9Z2H5;Q9Z2H5-2;Q9Z2H5-3	http://www.phosphosite.org/proteinAction.do?id=6633&showAllSites=true	98.3	IKIRPGEyEQFESTI			IRPGEY*EQFESTIGFK	2	990.959	23529	23741	23291	23300	23667	23567	23200	23469	23407	23495	23563	23212	72.4752	71.7272	72.1866	71.8475	72.1982	71.7824	72.1515	71.8705	71.9643	71.9455	71.9769	71.8734	2.995	4.1635	3.6869	3.833	4.5711	4.2422	4.1651	4.4867	4.4656	4.3027
832	830	Adaptor/scaffold	Epb41l1;Epb41l1;Epb41l1	EPB41L1;EPB41L1 iso4;EPB41L1 iso4	§343;343;343	Band 4.1-like protein 1	Q9Z2H5;Q9Z2H5-2;Q9Z2H5-3	http://www.phosphosite.org/proteinAction.do?id=6633&showAllSites=true	98.3	IKIRPGEyEQFESTI			IRPGEY*EQFESTIGFK	2	990.959											23554												71.9532
833	831	Adaptor/scaffold	Epb41l1;Epb41l1;Epb41l1	EPB41L1;EPB41L1 iso4;EPB41L1 iso4	§343;343;343	Band 4.1-like protein 1	Q9Z2H5;Q9Z2H5-2;Q9Z2H5-3	http://www.phosphosite.org/proteinAction.do?id=6633&showAllSites=true	98.3	IKIRPGEyEQFESTI			IRPGEY*EQFESTIGFK	3	660.975		23721		23283		23558	23205	23473	23396	23493		23218		71.6722		71.7997		71.7585	72.1662	71.8802	71.9336	71.9405		71.8881		5.0841		4.4185		4.787	4.9392	4.7338	4.7565	4.5903
834	832	Adaptor/scaffold	Epb41l1;Epb41l1;Epb41l1	EPB41L1;EPB41L1 iso4;EPB41L1 iso4	§343;343;343	Band 4.1-like protein 1	Q9Z2H5;Q9Z2H5-2;Q9Z2H5-3	http://www.phosphosite.org/proteinAction.do?id=6633&showAllSites=true	98.3	IKIRPGEyEQFESTI			IRPGEY*EQFESTIGFKLPNHR	3	866.755	22858	22979	22643	22522	22963	22835	22492	22725	22713	22739	22855	22532	70.6301	69.6919	70.4068	69.7615	70.3031	69.8327	70.2456	69.8857	70.1048	69.9328	70.0703	70.0597	3.7178	6.5878	5.1887	5.5491	6.3215	6.3057	6.0701	6.2933	6.6406	6.1739
835	833	Adaptor/scaffold	Epb41l1;Epb41l1;Epb41l1	EPB41L1;EPB41L1 iso4;EPB41L1 iso4	§343;343;343	Band 4.1-like protein 1	Q9Z2H5;Q9Z2H5-2;Q9Z2H5-3	http://www.phosphosite.org/proteinAction.do?id=6633&showAllSites=true	98.3	IKIRPGEyEQFESTI			IRPGEY*EQFESTIGFKLPNHR	3	866.755												22470												69.8941
836	834	Adaptor/scaffold	Epb41l1;Epb41l1;Epb41l1	EPB41L1;EPB41L1 iso4;EPB41L1 iso4	§343;343;343	Band 4.1-like protein 1	Q9Z2H5;Q9Z2H5-2;Q9Z2H5-3	http://www.phosphosite.org/proteinAction.do?id=6633&showAllSites=true	98.3	IKIRPGEyEQFESTI			IRPGEY*EQFESTIGFKLPNHR	4	650.318	22851	22961	22615	22515	22943	22808	22473	22700	22706	22711	22835	22451	70.6111	69.6446	70.3304	69.7447	70.2509	69.7637	70.1934	69.8195	70.0857	69.8593	70.0179	69.8444	5.8731	6.2154	4.5316	6.4185	6.5807	6.1809	6.2126	6.8168	7.2493	5.9195
837	835	Adaptor/scaffold	Epb41l1;Epb41l1;Epb41l1	EPB41L1;EPB41L1 iso4;EPB41L1 iso4	§343;343;343	Band 4.1-like protein 1	Q9Z2H5;Q9Z2H5-2;Q9Z2H5-3	http://www.phosphosite.org/proteinAction.do?id=6633&showAllSites=true	98.3	IKIRPGEyEQFESTI			IRPGEY*EQFESTIGFKLPNHR	4	650.318	22989			22509					22769			22446	70.9791			69.7261					70.2543			69.8325	4.2735			6.8515					4.0511
838	836	Adaptor/scaffold	Epb41l1;Epb41l1;Epb41l1	EPB41L1;EPB41L1 iso4;EPB41L1 iso4	§68;68;68	Band 4.1-like protein 1	Q9Z2H5;Q9Z2H5-2;Q9Z2H5-3	http://www.phosphosite.org/proteinAction.do?id=6633&showAllSites=true	98.3	LDMDDKDySEADGLS			HLTQQDTRPAEQSLDMDDKDY*SEADGLSER	4	883.381	15447												50.2435												2.0172
839	837	Adaptor/scaffold	Epb41l1;Epb41l1;Epb41l1	EPB41L1;EPB41L1 iso4;EPB41L1 iso4	§793;781;645	Band 4.1-like protein 1	Q9Z2H5;Q9Z2H5-2;Q9Z2H5-3	http://www.phosphosite.org/proteinAction.do?id=6633&showAllSites=true	98.3	GKDVLTStYGATAET			DVLTST*YGATAETLSTSTTTHVTK	3	855.737	20846												65.1662												1.1984
840	838	Adaptor/scaffold	Epb41l1;Epb41l1;Epb41l1	EPB41L1;EPB41L1 iso4;EPB41L1 iso4	862;850;714	Band 4.1-like protein 1	Q9Z2H5;Q9Z2H5-2;Q9Z2H5-3	http://www.phosphosite.org/proteinAction.do?id=6633&showAllSites=true	98.3	LVTKAVVyRETDPSP			AVVY*RETDPSPEER	3	576.593	10024		9695				9534				9956		35.4596		35.288				35.2947				35.2165		1.4443		1.0194				1.4641
841	839	Adaptor/scaffold	Epb41l1;Epb41l1;Epb41l1;Epb41l2	EPB41L1;EPB41L1 iso4;EPB41L1 iso4;EPB41L2	§335;335;335;§449	Band 4.1-like protein 1	Q9Z2H5;Q9Z2H5-2;Q9Z2H5-3;O70318	http://www.phosphosite.org/proteinAction.do?id=6633&showAllSites=true	98.3	SYKRSNFyIKIRPGE			SNFY*IK	2	426.189	17343	17442	17013	16996	17366	17248	16885				17290		55.5742	54.8643	55.2155	54.8996	55.2863	54.9071	55.1486				55.0767		1.3612	1.6324	1.4633	1.846	1.5294	1.7872	1.5785
842	840	Adaptor/scaffold	Eps15	EPS15	§242	Epidermal growth factor receptor substrate 15	P42567	http://www.phosphosite.org/proteinAction.do?id=4071&showAllSites=true	98.4	TDKDMDGyVSGLEVR			AKYDEIFLKTDKDMDGY*VSGLEVR	4	718.842				24112		24420			24277	24332	24447	24081				74.028		74.046			74.2959	74.1712	74.3352	74.1967				3.557		2.2732			3.1365	3.4285
843	841	Adaptor/scaffold	Eps15	EPS15	§242	Epidermal growth factor receptor substrate 15	P42567	http://www.phosphosite.org/proteinAction.do?id=4071&showAllSites=true	98.4	TDKDMDGyVSGLEVR			AKYDEIFLKTDKDMDGY*VSGLEVR	4	718.842												24074												74.1776
844	842	Adaptor/scaffold	Eps15l1;Eps15l1;Eps15l1	EPS15R;EPS15R iso 2;EPS15R iso 3	§562;§562;§562	Epidermal growth factor receptor substrate 15-like 1	Q60902;Q60902-2;Q60902-3	http://www.phosphosite.org/proteinAction.do?id=3028&showAllSites=true	99.2	AHRSLEQyDQVPDGV			SLEQY*DQVPDGVSGTSLPDLATLNEGILLAER	3	1160.9	36884				37311	37362	36796	37188		37198	37221	36886	108.735				108.706	108.652	108.686	108.624		108.643	108.667	108.583	4.2864				6.274	4.9109	5.6949	5.7088		6.5984
845	843	Adaptor/scaffold	Eps15l1;Eps15l1;Eps15l1	EPS15R;EPS15R iso 2;EPS15R iso 3	§562;§562;§562	Epidermal growth factor receptor substrate 15-like 1	Q60902;Q60902-2;Q60902-3	http://www.phosphosite.org/proteinAction.do?id=3028&showAllSites=true	99.2	AHRSLEQyDQVPDGV			SLEQY*DQVPDGVSGTSLPDLATLNEGILLAER	3	1160.9											37207												108.631
846	844	Adaptor/scaffold	Eps15l1;Eps15l1;Eps15l1;Eps15l1	EPS15R;EPS15R iso 2;EPS15R iso 3;EPS15R iso 4	§74;§74;§74;§74	Epidermal growth factor receptor substrate 15-like 1	Q60902;Q60902-2;Q60902-3;Q60902-4	http://www.phosphosite.org/proteinAction.do?id=3028&showAllSites=true	99.2	FLDKQGFyVALRLVA			GFLDKQGFY*VALR	3	531.932									27192												82.1032												2.0543
847	845	Adaptor/scaffold	Eps8	EPS8	§524	Epidermal growth factor receptor kinase substrate 8	Q08509	http://www.phosphosite.org/proteinAction.do?id=4382&showAllSites=true	91.7	NHQVDRNyDAVKTQP			STPNHQVDRNY*DAVK	3	608.607	6343	6367	6042	5859	6282	6125		6138	6095	6128	6296		25.4171	25.0149	25.3614	24.762	25.5124	25.129		25.2717	25.2946	25.1685	25.3364		1.3848	1.3975	1.5554	1.2771	2.381	1.6806		1.0955	1.1576	1.8633
848	846	Adaptor/scaffold	Eps8	EPS8	§674	Epidermal growth factor receptor kinase substrate 8	Q08509	http://www.phosphosite.org/proteinAction.do?id=4382&showAllSites=true	91.7	IVRDSQRyKQLPVDR			Y*KQLPVDRR	3	418.883		7356									7224			27.683									27.8453			1.1207
849	847	Adaptor/scaffold	Fnbp1l;Fnbp1l	FNBP1L;FNBP1L iso 2	§291;§291	Formin-binding protein 1-like	Q8K012;Q8K012-2	http://www.phosphosite.org/proteinAction.do?id=7333&showAllSites=true	69.8	EDYSQHIyRTISDGT			SGFEPPGDFPFEDYSQHIY*R	3	823.346	28865	29127					28606		28843	28914	28963	28604	86.8957	86.1583					86.6496		86.5309	86.4565	86.4851	86.3533	1.8538	3.3239					2.3605		3.2683	3.0093
850	848	Adaptor/scaffold	Fnbp1l;Fnbp1l	FNBP1L;FNBP1L iso 2	§291;§291	Formin-binding protein 1-like	Q8K012;Q8K012-2	http://www.phosphosite.org/proteinAction.do?id=7333&showAllSites=true	69.8	EDYSQHIyRTISDGT			SGFEPPGDFPFEDYSQHIY*R	3	823.346												28594												86.3232
851	849	Adaptor/scaffold	Fnbp1l;Fnbp1l	FNBP1L;FNBP1L iso 2	§98;§98	Formin-binding protein 1-like	Q8K012;Q8K012-2	http://www.phosphosite.org/proteinAction.do?id=7333&showAllSites=true	69.8	EEMAHRVyGELMRYA			EVVAEEMAHRVY*GELMR	3	700.32	24519	24699	24273								24575	24205	75.1453	74.2814	74.8565								74.681	74.5433	1.4741	3.493	1.7455
852	850	Adaptor/scaffold	Fnbp1l;Fnbp1l	FNBP1L;FNBP1L iso 2	§98;§98	Formin-binding protein 1-like	Q8K012;Q8K012-2	http://www.phosphosite.org/proteinAction.do?id=7333&showAllSites=true	69.8	EEMAHRVyGELMRYA			EVVAEEMAHRVY*GELMR	3	700.32	24537										24571		75.1954										74.6691		1.1057
853	851	Adaptor/scaffold	Frs2	FRS2	§306	Fibroblast growth factor receptor substrate 2	Q8C180	http://www.phosphosite.org/proteinAction.do?id=1636&showAllSites=true	56.8	PPVNKLVyENINGLS		GRB2	LVY*ENINGLSIPSASGVRR	3	709.032											23424												71.5907
854	852	Adaptor/scaffold	Frs2	FRS2	§349	Fibroblast growth factor receptor substrate 2	Q8C180	http://www.phosphosite.org/proteinAction.do?id=1636&showAllSites=true	56.8	RRPALLNyENLPSLP		GRB2	RPALLNY*ENLPSLPPVWEAR	3	805.746	32086	32310									32106	31773	95.7073	94.7039									94.952	94.8336	1.4633	2.7397
855	853	Adaptor/scaffold	Frs3	FRS3	454	Fibroblast growth factor receptor substrate 3	Q91WJ0	http://www.phosphosite.org/proteinAction.do?id=12772800&showAllSites=true	53.9	HPVRSSDsYAVIDLK			SSDS*YAVIDLK	2	639.287	21022												65.6364												2.027
856	854	Adaptor/scaffold	Frs3	FRS3	454	Fibroblast growth factor receptor substrate 3	Q91WJ0	http://www.phosphosite.org/proteinAction.do?id=12772800&showAllSites=true	53.9	HPVRSSDsYAVIDLK			SSDS*YAVIDLKK	3	469.225	16470						15985						53.182						52.7118						1.9176						2.4907
857	855	Adaptor/scaffold	Frs3	FRS3	455	Fibroblast growth factor receptor substrate 3	Q91WJ0	http://www.phosphosite.org/proteinAction.do?id=12772800&showAllSites=true	53.9	PVRSSDSyAVIDLKK			SSDSY*AVIDLK	2	639.287											21090	20726											65.2863	65.1917
858	856	Adaptor/scaffold	Frs3	FRS3	455	Fibroblast growth factor receptor substrate 3	Q91WJ0	http://www.phosphosite.org/proteinAction.do?id=12772800&showAllSites=true	53.9	PVRSSDSyAVIDLKK			SSDSY*AVIDLKK	3	469.225	16459				16461				16200	16244	16390	15983	53.1512				52.861				52.6351	52.5016	52.6501	52.5075	1.9363				2.6135				2.3911	2.9745
859	857	Adaptor/scaffold	Fyb1;Fyb1	SLAP-130;Fyb1 iso 2	§559;559	FYN-binding protein 1	O35601;O35601-2	http://www.phosphosite.org/proteinAction.do?id=3219&showAllSites=true	90	TTAVEIDyDSLKRKK			TTAVEIDY*DSLKR	2	795.874		18101		17644			17524	17834	17779	17821	17935	17553		56.6257		56.6399			56.9143	56.7394	56.883	56.7491	56.8247	56.7133		3.6239		3.3773			3.4177	3.7816	3.7517	3.7743
860	858	Adaptor/scaffold	Fyb1;Fyb1	SLAP-130;Fyb1 iso 2	§559;559	FYN-binding protein 1	O35601;O35601-2	http://www.phosphosite.org/proteinAction.do?id=3219&showAllSites=true	90	TTAVEIDyDSLKRKK			TTAVEIDY*DSLKR	3	530.919		18099	17659	17648		17905	17528	17821	17775	17805	17925	17549		56.6207	56.9723	56.6496		56.6673	56.9259	56.7063	56.8734	56.7063	56.7985	56.7039		3.2044	3.3196	3.1981		2.8742	3.7133	3.7269	4.0927	3.6029
861	859	Adaptor/scaffold	Fyb1;Fyb1	SLAP-130;Fyb1 iso 2	§561;561	FYN-binding protein 1	O35601;O35601-2	http://www.phosphosite.org/proteinAction.do?id=3219&showAllSites=true	90	AVEIDYDsLKRKKNS			TTAVEIDYDS*LKR	3	530.919	17951												57.2735												1.8195
862	860	Adaptor/scaffold	G3bp1	G3BP-1	§56	Ras GTPase-activating protein-binding protein 1	P97855	http://www.phosphosite.org/proteinAction.do?id=2712&showAllSites=true	51.8	GKPADAVyGQKEIHR			NSSYAHGGLDSNGKPADAVY*GQK	3	806.024										10593	10714	10306										37.238	37.2702	37.1959										2.2893
863	861	Adaptor/scaffold	G3bp2;G3bp2	G3BP-2;G3BP-2 iso2	§56;56	Ras GTPase-activating protein-binding protein 2	P97379;P97379-2	http://www.phosphosite.org/proteinAction.do?id=4379&showAllSites=true	54.1	GKPQEAVyGQNDIHH			NSSYVHGGVDASGKPQEAVY*GQNDIHHK	4	769.349	10640	10574	10249	10142	10456	10325	10046	10296	10309		10420	10045	37.1523	36.3875	36.7896	36.3885	36.7496	36.4144	36.6685	36.4782	36.7171		36.4796	36.4938	1.4887	8.3766	1.4604	7.5793	7.0341	8.8772	5.0328	6.9639	3.5309
864	862	Adaptor/scaffold	G3bp2;G3bp2	G3BP-2;G3BP-2 iso2	§56;56	Ras GTPase-activating protein-binding protein 2	P97379;P97379-2	http://www.phosphosite.org/proteinAction.do?id=4379&showAllSites=true	54.1	GKPQEAVyGQNDIHH			NSSYVHGGVDASGKPQEAVY*GQNDIHHK	4	769.349			10228												36.7322												4.4122
865	863	Adaptor/scaffold	G3bp2;G3bp2	G3BP-2;G3BP-2 iso2	§56;56	Ras GTPase-activating protein-binding protein 2	P97379;P97379-2	http://www.phosphosite.org/proteinAction.do?id=4379&showAllSites=true	54.1	GKPQEAVyGQNDIHH			NSSYVHGGVDASGKPQEAVY*GQNDIHHK	5	615.681	10633	10576	10243						10303			10054	37.1329	36.3922	36.7728						36.7003			36.5173	1.7461	5.0948	1.5624						2.5793
866	864	Adaptor/scaffold	Gab1	GAB1	§259	GRB2-associated-binding protein 1	Q9QYY0	http://www.phosphosite.org/proteinAction.do?id=1645&showAllSites=true	76.8	VSGESSLyNLPRSYS			LTSVSGESSLY*NLPR	2	851.906		21857										21275		66.6937										66.6684		4.1664
867	865	Adaptor/scaffold	Gab1	GAB1	§407	GRB2-associated-binding protein 1	Q9QYY0	http://www.phosphosite.org/proteinAction.do?id=1645&showAllSites=true	76.8	DASSQDCyDIPRTFP	Met	PLCG1	DASSQDCY*DIPR	2	753.782							12634				13080								43.6478				43.6583								1.5622
868	866	Adaptor/scaffold	Gab1	GAB1	§628	GRB2-associated-binding protein 1	Q9QYY0	http://www.phosphosite.org/proteinAction.do?id=1645&showAllSites=true	76.8	KGDKQVEyLDLDLDS	Met	SHP-2	GDKQVEY*LDLDLDSGK	2	937.925	22569											22249	69.8392											69.298	1.2019
869	867	Adaptor/scaffold	Gab1	GAB1	§628	GRB2-associated-binding protein 1	Q9QYY0	http://www.phosphosite.org/proteinAction.do?id=1645&showAllSites=true	76.8	KGDKQVEyLDLDLDS	Met	SHP-2	GDKQVEY*LDLDLDSGK	3	625.619	22556		22300	22297			22211		22441		22595	22227	69.8053		69.4839	69.1458			69.4942		69.3779		69.3657	69.2404	2.5302		3.3452	3.6084			3.2455		3.77
870	868	Adaptor/scaffold	Gab1	GAB1	§660	GRB2-associated-binding protein 1	Q9QYY0	http://www.phosphosite.org/proteinAction.do?id=1645&showAllSites=true	76.8	MADERVDyVVVDQQK	Met		SSGSGSSMADERVDY*VVVDQQK	3	808.684		17462		17008				17182	17120	17156	17267	16894		54.9165		54.9308				54.9923	55.1111	54.9635	55.0154	54.9444		5.0683		4.757				3.4803	3.5569	3.7813
871	869	Adaptor/scaffold	Gab2	GAB2	§290	GRB2-associated-binding protein 2	Q9Z1S8	http://www.phosphosite.org/proteinAction.do?id=1650&showAllSites=true	73.2	ETDNEDVyTFKMPSN			SSLTGSETDNEDVY*TFKMPSNTLCR	3	978.084												22795												70.7609
872	870	Adaptor/scaffold	Gab2	GAB2	§321	GRB2-associated-binding protein 2	Q9Z1S8	http://www.phosphosite.org/proteinAction.do?id=1650&showAllSites=true	73.2	PTTPLSAyQIPRTFT			ELGDLLVDNMDVPTTPLSAY*QIPR	3	913.11									34855	35011	34991	34682									102.695	102.802	102.663	102.661									1.4527	1.4796
873	871	Adaptor/scaffold	Gab2	GAB2	§321	GRB2-associated-binding protein 2	Q9Z1S8	http://www.phosphosite.org/proteinAction.do?id=1650&showAllSites=true	73.2	PTTPLSAyQIPRTFT			ELGDLLVDNMDVPTTPLSAY*QIPR	3	913.11										34982												102.723												2.4681
874	872	Adaptor/scaffold	Garem1;Garem1	GAREM;Garem1 iso 2	74;74	GRB2-associated and regulator of MAPK protein	Q3UFT3;Q3UFT3-2	http://www.phosphosite.org/proteinAction.do?id=4324&showAllSites=true	97.2	HSLEEGHyVIGPKIE			QWTTITAHSLEEGHY*VIGPK	3	783.042				22747							23066					70.3673							70.6324					2.1325
875	873	Adaptor/scaffold	Grasp	GRASP	§236	General receptor for phosphoinositides 1-associated scaffold protein	Q9JJA9	http://www.phosphosite.org/proteinAction.do?id=8778&showAllSites=true	42.3	VVKDPSIyDTLESVR			LVHGLVVKDPSIY*DTLESVR	3	774.07	25394	25516	25156	25057	25499	25364	25040	25271	25279	25299	25401	25042	77.5064	76.4645	77.2221	76.5618	77.1044	76.5884	77.0981	76.6832	76.9646	76.7666	76.8855	76.7666	5.806	7.5072	6.803	7.5903	7.0449	6.6467	6.9462	7.2132	5.9471	7.6184
876	874	Adaptor/scaffold	Grasp	GRASP	§236	General receptor for phosphoinositides 1-associated scaffold protein	Q9JJA9	http://www.phosphosite.org/proteinAction.do?id=8778&showAllSites=true	42.3	VVKDPSIyDTLESVR			LVHGLVVKDPSIY*DTLESVR	3	774.07						25405												76.6976												3.5826
877	875	Adaptor/scaffold	Grb14	GRB14	§111	Growth factor receptor-bound protein 14	Q9JLM9	http://www.phosphosite.org/proteinAction.do?id=5564&showAllSites=true	60.5	KKQVIKVySEDETSR			QVIKVY*SEDETSR	2	817.377			11781			11970	11589		11838		12050	11647			40.9411			40.7964	40.822		40.825		40.8579	40.7865			1.917			2.7268	1.9395		1.6833
878	876	Adaptor/scaffold	Grb14	GRB14	§111	Growth factor receptor-bound protein 14	Q9JLM9	http://www.phosphosite.org/proteinAction.do?id=5564&showAllSites=true	60.5	KKQVIKVySEDETSR			QVIKVY*SEDETSR	3	545.254		12251		11760										40.8976		40.7387										2.3972		3.0514
879	877	Adaptor/scaffold	Grb2;Grb2	GRB2;GRB2 iso 2	§160;119	Growth factor receptor-bound protein 2	Q60631;Q60631-2	http://www.phosphosite.org/proteinAction.do?id=1668&showAllSites=true	25.2	QMPQQPTyVQALFDF	Src		DIEQM#PQQPTY*VQALFDFDPQEDGELGFR	3	1170.51	36477	37223	36376		36923		36423		36753	36899		36555	107.636	107.892	107.584		107.673		107.68		107.807	107.846		107.694	4.0346	4.2578	5.6167		5.4753		5.8698		4.3731	5.8372
880	878	Adaptor/scaffold	Grb2;Grb2	GRB2;GRB2 iso 2	§160;119	Growth factor receptor-bound protein 2	Q60631;Q60631-2	http://www.phosphosite.org/proteinAction.do?id=1668&showAllSites=true	25.2	QMPQQPTyVQALFDF	Src		DIEQM#PQQPTY*VQALFDFDPQEDGELGFR	3	1170.51	36504								36722			36633	107.707								107.723			107.905	1.8233								4.9959
881	879	Adaptor/scaffold	Grb2;Grb2	GRB2;GRB2 iso 2	§160;119	Growth factor receptor-bound protein 2	Q60631;Q60631-2	http://www.phosphosite.org/proteinAction.do?id=1668&showAllSites=true	25.2	QMPQQPTyVQALFDF	Src		DIEQMPQQPTY*VQALFDFDPQEDGELGFR	3	1165.18				37134												108.966												4.4283
882	880	Adaptor/scaffold	Grb2;Grb2	GRB2;GRB2 iso 2	§160;119	Growth factor receptor-bound protein 2	Q60631;Q60631-2	http://www.phosphosite.org/proteinAction.do?id=1668&showAllSites=true	25.2	QMPQQPTyVQALFDF	Src		DIEQMPQQPTY*VQALFDFDPQEDGELGFRR	3	1217.22		35045		34551										102.041		102.018										2.3467		2.5149
883	881	Adaptor/scaffold	Grb2;Grb2	GRB2;GRB2 iso 2	§209;168	Growth factor receptor-bound protein 2	Q60631;Q60631-2	http://www.phosphosite.org/proteinAction.do?id=1668&showAllSites=true	25.2	TGMFPRNyVTPVNRN			NY*VTPVNR	2	521.74		10145		9718		9899		9811	9824	9862				35.2382		35.2298		35.2765		35.1572	35.39	35.251				2.0182		1.9947		1.8486		2.145	1.7427	2.0194
884	882	Adaptor/scaffold	Grb2;Grb2	GRB2;GRB2 iso 2	159;118	Growth factor receptor-bound protein 2	Q60631;Q60631-2	http://www.phosphosite.org/proteinAction.do?id=1668&showAllSites=true	25.2	EQMPQQPtYVQALFD			DIEQMPQQPT*YVQALFDFDPQEDGELGFR	3	1165.18	36893	37624	36806	37196	37355	37497	36838	37372	37135	37315	37341	37014	108.759	108.984	108.743	109.133	108.824	109.016	108.797	109.119	108.83	108.952	108.985	108.93	5.7345	4.9065	5.5745	3.9875	5.5533	5.0567	6.5134	4.0453	5.7785	5.3767
885	883	Adaptor/scaffold	Grb2;Grb2	GRB2;GRB2 iso 2	159;118	Growth factor receptor-bound protein 2	Q60631;Q60631-2	http://www.phosphosite.org/proteinAction.do?id=1668&showAllSites=true	25.2	EQMPQQPtYVQALFD			DIEQMPQQPT*YVQALFDFDPQEDGELGFR	3	1165.18		37703		37161		37491		37335			37271	36997		109.2		109.04		109		109.021			108.801	108.882		4.6073		4.5978		4.9003		5.0236
886	884	Adaptor/scaffold	Grip1;Grip1;Grip1;Grip1	GRIP1;GRIP1 iso2;GRIP1 iso3;LGALS12 iso 4	1047;954;953;552	Glutamate receptor-interacting protein 1	Q925T6;Q925T6-2;Q925T6-3;Q925T6-4	http://www.phosphosite.org/proteinAction.do?id=17435&showAllSites=true	122	DVGGLKPyDRLLQVN			NIRPAGPGDVGGLKPY*DR	3	654.658							14050	14310			14505	14058							47.4343	47.2139			47.4759	47.2439							1.1283	1.7816
887	885	Adaptor/scaffold	Grip1;Grip1;Grip1;Grip1	GRIP1;GRIP1 iso2;GRIP1 iso3;LGALS12 iso 4	1047;954;953;552	Glutamate receptor-interacting protein 1	Q925T6;Q925T6-2;Q925T6-3;Q925T6-4	http://www.phosphosite.org/proteinAction.do?id=17435&showAllSites=true	122	DVGGLKPyDRLLQVN			NIRPAGPGDVGGLKPY*DR	3	654.658											14494												47.4476
888	886	Adaptor/scaffold	Hgs	Hrs	§131	Hepatocyte growth factor-regulated tyrosine kinase substrate	Q99LI8	http://www.phosphosite.org/proteinAction.do?id=3905&showAllSites=true	86	KYKVVQDtYQIMKVE			VVQDT*YQIMKVEGHVFPEFK	3	825.399				27347												82.734												1.7698
889	887	Adaptor/scaffold	Hgs	Hrs	§131	Hepatocyte growth factor-regulated tyrosine kinase substrate	Q99LI8	http://www.phosphosite.org/proteinAction.do?id=3905&showAllSites=true	86	KYKVVQDtYQIMKVE			YKVVQDT*YQIMKVEGHVFPEFK	4	692.091				27122		27493										82.1306		82.2884										3.6689		2.8695
890	888	Adaptor/scaffold	Hgs	Hrs	§132	Hepatocyte growth factor-regulated tyrosine kinase substrate	Q99LI8	http://www.phosphosite.org/proteinAction.do?id=3905&showAllSites=true	86	YKVVQDTyQIMKVEG			VVQDTY*QIMKVEGHVFPEFK	3	825.399		27825									27708	27329		82.6658									83.062	82.9074		2.0625
891	889	Adaptor/scaffold	Hgs	Hrs	§132	Hepatocyte growth factor-regulated tyrosine kinase substrate	Q99LI8	http://www.phosphosite.org/proteinAction.do?id=3905&showAllSites=true	86	YKVVQDTyQIMKVEG			YKVVQDTY*QIMKVEGHVFPEFK	4	692.091		27608		27139				27363			27488			82.089		82.1765				82.3141			82.4802			3.4957		3.4605				2.6504
892	890	Adaptor/scaffold	Hgs	Hrs	§216	Hepatocyte growth factor-regulated tyrosine kinase substrate	Q99LI8	http://www.phosphosite.org/proteinAction.do?id=3905&showAllSites=true	86	VRVCEPCyEQLNKKA			VCEPCY*EQLNK	2	760.301	12810	12998	12485	12545	12765	12739	12338	12663	12594	12681	12772	12386	43.0859	42.8933	42.8466	42.8504	42.9341	42.8434	42.8445	42.8127	42.868	42.8415	42.8354	42.7734	2.0526	2.726	2.8898	2.4347	2.8968	2.4485	2.8341	2.6555	2.6098	2.7034
893	891	Adaptor/scaffold	Hgs	Hrs	§216	Hepatocyte growth factor-regulated tyrosine kinase substrate	Q99LI8	http://www.phosphosite.org/proteinAction.do?id=3905&showAllSites=true	86	VRVCEPCyEQLNKKA			VCEPCY*EQLNKK	3	549.902	10901	10900	10516	10446	10752	10644	10327	10599	10581	10631	10734	10346	37.8603	37.2631	37.5245	37.208	37.5453	37.264	37.4213	37.2922	37.4467	37.3409	37.3225	37.3036	1.326	2.2266	2.6234	3.0913	2.5197	2.3265	2.388	2.8534	2.3506	2.8121
894	892	Adaptor/scaffold	Hgs	Hrs	§216	Hepatocyte growth factor-regulated tyrosine kinase substrate	Q99LI8	http://www.phosphosite.org/proteinAction.do?id=3905&showAllSites=true	86	VRVCEPCyEQLNKKA			VCEPCY*EQLNKKAEGK	3	678.3	10336	10334	9967	9939	10242	10131	9853	10055	10079	10087	10199	9859	36.3031	35.7432	36.0138	35.8419	36.1782	35.8979	36.1543	35.8297	36.0819	35.8775	35.8798	35.98	1.1902	1.7913	1.7953	2.4229	1.7311	1.7796	1.7719	2.2373	1.7889	1.7314
895	893	Adaptor/scaffold	Hgs	Hrs	§216	Hepatocyte growth factor-regulated tyrosine kinase substrate	Q99LI8	http://www.phosphosite.org/proteinAction.do?id=3905&showAllSites=true	86	VRVCEPCyEQLNKKA			VCEPCY*EQLNKKAEGK	3	678.3			9978									9837			36.0443									35.9187			1.9698
896	894	Adaptor/scaffold	Hgs	Hrs	§306	Hepatocyte growth factor-regulated tyrosine kinase substrate	Q99LI8	http://www.phosphosite.org/proteinAction.do?id=3905&showAllSites=true	86	SSAPPAGsLYSSPVN			AEPTPLASSAPPAGS*LYSSPVNSSAPLAEDIDPELAR	3	1253.27											30907												91.7117
897	895	Adaptor/scaffold	Hgs	Hrs	§308	Hepatocyte growth factor-regulated tyrosine kinase substrate	Q99LI8	http://www.phosphosite.org/proteinAction.do?id=3905&showAllSites=true	86	APPAGSLySSPVNSS			AEPTPLASSAPPAGSLY*SSPVNSSAPLAEDIDPELAR	3	1253.27		31208					30492		30804			30590		91.7257					91.74		91.801			91.6673		4.0916					4.2432		4.1537
898	896	Adaptor/scaffold	Hgs	Hrs	§310	Hepatocyte growth factor-regulated tyrosine kinase substrate	Q99LI8	http://www.phosphosite.org/proteinAction.do?id=3905&showAllSites=true	86	PAGSLYSsPVNSSAP			AEPTPLASSAPPAGSLYSS*PVNSSAPLAEDIDPELAR	3	1253.27		31185						30877		30899	30893			91.6664						91.7244		91.7924	91.676			4.401						4.659		4.0034
899	897	Adaptor/scaffold	Hgs	Hrs	§329, §334	Hepatocyte growth factor-regulated tyrosine kinase substrate	Q99LI8	http://www.phosphosite.org/proteinAction.do?id=3905&showAllSites=true	86	IDPELARyLNRNYWE;ARYLNRNyWEKKQEE			Y*LNRNY*WEK	2	723.286												14299												47.8924
900	898	Adaptor/scaffold	Hgs	Hrs	§334	Hepatocyte growth factor-regulated tyrosine kinase substrate	Q99LI8	http://www.phosphosite.org/proteinAction.do?id=3905&showAllSites=true	86	ARYLNRNyWEKKQEE			YLNRNY*WEK	2	683.303		14398	14027	13932	14313	14153	13863	14107	14097	14140	14292	13883		46.6347	47.0243	46.5663	47.0575	46.6139	46.935	46.6754	46.8821	46.7433	46.9006	46.7759		2.4483	2.2942	2.5013	2.7121	2.2605	2.0648	2.0549	2.3752	2.537
901	899	Adaptor/scaffold	Hgs	Hrs	§334	Hepatocyte growth factor-regulated tyrosine kinase substrate	Q99LI8	http://www.phosphosite.org/proteinAction.do?id=3905&showAllSites=true	86	ARYLNRNyWEKKQEE			YLNRNY*WEK	3	455.871	14397	14396	14025	13931	14304	14149	13855	14104	14093	14133	14296	13880	47.4025	46.6297	47.0194	46.564	47.0336	46.602	46.9135	46.6683	46.8724	46.7244	46.9103	46.7684	1.3867	2.058	1.2903	1.7434	1.8354	1.6427	2.1817	2.1264	1.9116	2.0763
902	900	Adaptor/scaffold	Irs1	IRS1	§608	Insulin receptor substrate 1	P35569	http://www.phosphosite.org/proteinAction.do?id=854&showAllSites=true	130.6	NLHTDDGyMPMSPGV			GGHHRPDTSNLHTDDGY*MPMSPGVAPVPSNR	4	845.624								15850	15788		16001	15615								51.4361	51.5265		51.5772	51.5219								4.4728	3.2488
903	901	Adaptor/scaffold	Irs1	IRS1	§608	Insulin receptor substrate 1	P35569	http://www.phosphosite.org/proteinAction.do?id=854&showAllSites=true	130.6	NLHTDDGyMPMSPGV			RGGHHRPDTSNLHTDDGY*MPMSPGVAPVPSNR	4	884.649											14925	14544											48.5975	48.5503
904	902	Adaptor/scaffold	Irs1	IRS1	§608	Insulin receptor substrate 1	P35569	http://www.phosphosite.org/proteinAction.do?id=854&showAllSites=true	130.6	NLHTDDGyMPMSPGV			RGGHHRPDTSNLHTDDGY*MPMSPGVAPVPSNR	5	707.921	15108										14924	14534	49.3337										48.5951	48.5239	2.3017
905	903	Adaptor/scaffold	Irs1	IRS1	§628	Insulin receptor substrate 1	P35569	http://www.phosphosite.org/proteinAction.do?id=854&showAllSites=true	130.6	NRKGNGDyMPMSPKS			KGNGDY*MPMSPK	2	702.788		12938									12838	12460		42.7337									43.0167	42.9687		2.1423
906	904	Adaptor/scaffold	Irs2	IRS2	§538	Insulin receptor substrate 2	P81122	http://www.phosphosite.org/proteinAction.do?id=6132&showAllSites=true	136.7	SGGELYGyMSMDRPL			DGSGGELYGY*MSMDRPLSHCGRPYR	4	736.061	19811	19889		19457	19844	19706	19379	19622	19631	19637	19765	19380	62.3715	61.4212		61.513	61.943	61.4696	61.9163	61.561	61.8511	61.6206	61.7534	61.6179	1.8793	4.8334		4.077	3.6725	4.9044	3.5243	4.1054	3.6714	3.8084
907	905	Adaptor/scaffold	Irs2	IRS2	§624, §649	Insulin receptor substrate 2	P81122	http://www.phosphosite.org/proteinAction.do?id=6132&showAllSites=true	136.7	PKVAYNPyPEDYGDI;NLGADDGyMPMTPGA	INSR	INSR	VAYNPY*PEDYGDIEIGSHKSSSSNLGADDGY*MPMTPGAALR	4	1127.23											27441												82.3568
908	906	Adaptor/scaffold	Irs2	IRS2	§649	Insulin receptor substrate 2	P81122	http://www.phosphosite.org/proteinAction.do?id=6132&showAllSites=true	136.7	NLGADDGyMPMTPGA			SSSSNLGADDGY*M#PM#TPGAALR	3	770.652									16864												54.4256												1.5555
909	907	Adaptor/scaffold	Irs2	IRS2	§649	Insulin receptor substrate 2	P81122	http://www.phosphosite.org/proteinAction.do?id=6132&showAllSites=true	136.7	NLGADDGyMPMTPGA			SSSSNLGADDGY*M#PMTPGAALR	3	765.32		20323	19739	19855						19987				62.5803	62.5886	62.5707						62.5533				3.5007	1.8278	2.9566						3.8408
910	908	Adaptor/scaffold	Irs2	IRS2	§649	Insulin receptor substrate 2	P81122	http://www.phosphosite.org/proteinAction.do?id=6132&showAllSites=true	136.7	NLGADDGyMPMTPGA			SSSSNLGADDGY*MPM#TPGAALR	3	765.32			20301	20409			20198	20574	20529	20548		20291			64.0964	64.058			64.095	64.1087	64.2382	64.0525		64.0335			1.8275	2.5332			3.0324	3.9839	3.2747	3.8534
911	909	Adaptor/scaffold	Irs2	IRS2	§649	Insulin receptor substrate 2	P81122	http://www.phosphosite.org/proteinAction.do?id=6132&showAllSites=true	136.7	NLGADDGyMPMTPGA			SSSSNLGADDGY*MPM#TPGAALR	3	765.32				20433					20470							64.122					64.0811							2.6016					2.5862
912	910	Adaptor/scaffold	Irs2	IRS2	§649	Insulin receptor substrate 2	P81122	http://www.phosphosite.org/proteinAction.do?id=6132&showAllSites=true	136.7	NLGADDGyMPMTPGA			SSSSNLGADDGY*MPMTPGAALR	2	1139.48	24057	24430	23846				23763	24113	24013	24123	24173	23836	73.8838	73.566	73.69				73.676	73.5854	73.5884	73.6179	73.6078	73.5468	1.3486	5.1552	2.976				4.5441	5.0225	4.2713	5.1561
913	911	Adaptor/scaffold	Irs2	IRS2	§649	Insulin receptor substrate 2	P81122	http://www.phosphosite.org/proteinAction.do?id=6132&showAllSites=true	136.7	NLGADDGyMPMTPGA			SSSSNLGADDGY*MPMTPGAALR	3	759.989	24044	24414	23841	23946	24228	24241	23754	24104	24003	24106	24160	23818	73.8508	73.5227	73.6782	73.5778	73.6972	73.5724	73.652	73.5619	73.5621	73.5729	73.5739	73.4988	2.2096	3.8394	3.0727	3.7989	3.9727	4.3118	4.3208	4.1964	3.7858	4.346
914	912	Adaptor/scaffold	Irs2	IRS2	§649	Insulin receptor substrate 2	P81122	http://www.phosphosite.org/proteinAction.do?id=6132&showAllSites=true	136.7	NLGADDGyMPMTPGA			SSSSNLGADDGY*MPMTPGAALR	3	759.989			23818												73.616												3.62
915	913	Adaptor/scaffold	Irs2	IRS2	§649	Insulin receptor substrate 2	P81122	http://www.phosphosite.org/proteinAction.do?id=6132&showAllSites=true	136.7	NLGADDGyMPMTPGA			SSSSNLGADDGY*MPMTPGAALR	3	759.989			23899												73.83												1.1068
916	914	Adaptor/scaffold	Irs2	IRS2	§671	Insulin receptor substrate 2	P81122	http://www.phosphosite.org/proteinAction.do?id=6132&showAllSites=true	136.7	NSCKSDDyMPMSPTS			SGGPNSCKSDDY*M#PMSPTSVSAPK	3	866.018		14179		13697		13894	13529	13818	13801	13856		13615		46.0555		45.9398		45.9205	46.0417	45.9046	46.0932	45.984		46.0552		2.6407		3.2269		3.6808	2.0449	3.8384	3.0722	3.0917
917	915	Adaptor/scaffold	Irs2	IRS2	§671	Insulin receptor substrate 2	P81122	http://www.phosphosite.org/proteinAction.do?id=6132&showAllSites=true	136.7	NSCKSDDyMPMSPTS			SGGPNSCKSDDY*M#PMSPTSVSAPK	3	866.018								13836	13782											45.954	46.0414											3.8319	2.8454
918	916	Adaptor/scaffold	Irs2	IRS2	§671	Insulin receptor substrate 2	P81122	http://www.phosphosite.org/proteinAction.do?id=6132&showAllSites=true	136.7	NSCKSDDyMPMSPTS			SGGPNSCKSDDY*MPM#SPTSVSAPK	3	866.018							14341			14662									48.2247			48.1477									2.3128			3.0249
919	917	Adaptor/scaffold	Irs2	IRS2	§671	Insulin receptor substrate 2	P81122	http://www.phosphosite.org/proteinAction.do?id=6132&showAllSites=true	136.7	NSCKSDDyMPMSPTS			SGGPNSCKSDDY*MPM#SPTSVSAPK	3	866.018							14355												48.2605												2.5455
920	918	Adaptor/scaffold	Irs2	IRS2	§671	Insulin receptor substrate 2	P81122	http://www.phosphosite.org/proteinAction.do?id=6132&showAllSites=true	136.7	NSCKSDDyMPMSPTS			SGGPNSCKSDDY*MPMSPTSVSAPK	3	860.687	17811	17963	17542	17504	17865	17772	17401	17691	17656	17686	17793	17419	56.8966	56.253	56.6553	56.26	56.6239	56.3062	56.5771	56.3571	56.5535	56.3895	56.4411	56.3524	2.7409	5.0727	4.0865	3.8895	3.4721	5.2909	4.7812	4.4361	4.4778	4.0939
921	919	Adaptor/scaffold	Irs2	IRS2	§671	Insulin receptor substrate 2	P81122	http://www.phosphosite.org/proteinAction.do?id=6132&showAllSites=true	136.7	NSCKSDDyMPMSPTS			SGGPNSCKSDDY*MPMSPTSVSAPK	3	860.687			17549		17882					17694					56.6764		56.6689					56.411					3.4271		4.7271					5.1817
922	920	Adaptor/scaffold	Irs2	IRS2	§671, §675	Insulin receptor substrate 2	P81122	http://www.phosphosite.org/proteinAction.do?id=6132&showAllSites=true	136.7	NSCKSDDyMPMSPTS;SDDYMPMsPTSVSAP	PKCB		SGGPNSCKSDDY*MPMS*PTSVSAPK	3	887.342											18447												58.1954
923	921	Adaptor/scaffold	Irs2	IRS2	§671, §675	Insulin receptor substrate 2	P81122	http://www.phosphosite.org/proteinAction.do?id=6132&showAllSites=true	136.7	NSCKSDDyMPMSPTS;SDDYMPMsPTSVSAP	PKCB		SGGPNSCKSDDY*MPMS*PTSVSAPK	3	887.342											18465												58.2427
924	922	Adaptor/scaffold	Irs2	IRS2	§732	Insulin receptor substrate 2	P81122	http://www.phosphosite.org/proteinAction.do?id=6132&showAllSites=true	136.7	AESSPEDsGYMRMWC			ASSPAESSPEDS*GYM#R	2	883.832		7690			7338		6995							28.5803			28.353		28.413							1.8271			1.8579		2.5633
925	923	Adaptor/scaffold	Irs2	IRS2	§732	Insulin receptor substrate 2	P81122	http://www.phosphosite.org/proteinAction.do?id=6132&showAllSites=true	136.7	AESSPEDsGYMRMWC			ASSPAESSPEDS*GYMR	2	875.835	10990			10663	10903								38.1038			37.7904	37.9486								2.8872			3.3939	2.6406
926	924	Adaptor/scaffold	Irs2	IRS2	§734	Insulin receptor substrate 2	P81122	http://www.phosphosite.org/proteinAction.do?id=6132&showAllSites=true	136.7	SSPEDSGyMRMWCGS			ASSPAESSPEDSGY*M#R	2	883.832			7161	7224		7407		7382	7247	7354	7447				28.4015	28.5147		28.5644		28.624	28.425	28.4809	28.4396				1.6216	3.1011		2.4689		1.116	2.9964	2.2715
927	925	Adaptor/scaffold	Irs2	IRS2	§734	Insulin receptor substrate 2	P81122	http://www.phosphosite.org/proteinAction.do?id=6132&showAllSites=true	136.7	SSPEDSGyMRMWCGS			ASSPAESSPEDSGY*MR	2	875.835		11121	10640			10849	10467	10784	10721	10810	10885	10519		37.8607	37.8619			37.8099	37.8006	37.7837	37.8191	37.8154	37.726	37.7639		3.2678	2.9408			3.3335	3.3097	2.687	3.1179	2.6424
928	926	Adaptor/scaffold	Irs2	IRS2	§814	Insulin receptor substrate 2	P81122	http://www.phosphosite.org/proteinAction.do?id=6132&showAllSites=true	136.7	CSGDNDQyVLMSSPV			SYKAPCSCSGDNDQY*VLM#SSPVGR	3	925.38	16798	16848	16406	16413			16278	16599	16587	16629		16280	54.0958	53.2806	53.5536	53.337			53.5028	53.4322	53.681	53.5456		53.3083	1.7984	4.0929	1.7575	5.0835			4.1668	3.7094	4.138	4.7602
929	927	Adaptor/scaffold	Irs2	IRS2	§814	Insulin receptor substrate 2	P81122	http://www.phosphosite.org/proteinAction.do?id=6132&showAllSites=true	136.7	CSGDNDQyVLMSSPV			SYKAPCSCSGDNDQY*VLM#SSPVGR	3	925.38				16438					16515			16300				53.4035					53.4863			53.3606				2.7035					3.6336
930	928	Adaptor/scaffold	Irs2	IRS2	§814	Insulin receptor substrate 2	P81122	http://www.phosphosite.org/proteinAction.do?id=6132&showAllSites=true	136.7	CSGDNDQyVLMSSPV			SYKAPCSCSGDNDQY*VLMSSPVGR	3	920.048	19485	19675	19211	19236	19583	19486	19092	19397	19347	19402	19509	19129	61.477	60.8484	61.1541	60.9238	61.2416	60.8813	61.1446	60.9543	61.0892	60.9894	61.0634	60.9469	4.6786	6.7664	5.4587	6.014	5.1199	6.6918	6.1863	6.8264	5.8903	6.3543
931	929	Adaptor/scaffold	Irs2	IRS2	§814	Insulin receptor substrate 2	P81122	http://www.phosphosite.org/proteinAction.do?id=6132&showAllSites=true	136.7	CSGDNDQyVLMSSPV			SYKAPCSCSGDNDQY*VLMSSPVGR	3	920.048					19585												61.2465												5.1896
932	930	Adaptor/scaffold	Irs2	IRS2	540	Insulin receptor substrate 2	P81122	http://www.phosphosite.org/proteinAction.do?id=6132&showAllSites=true	136.7	GELYGYMsMDRPLSH			DGSGGELYGYMS*MDRPLSHCGRPYR	4	736.061			19509												61.9643												2.6609
933	931	Adaptor/scaffold	Itsn1	ITSN1	1509	Intersectin-1	Q9Z0R4	http://www.phosphosite.org/proteinAction.do?id=6575&showAllSites=true	194.2	SNLQYKMyKTPIFLN			MY*KTPIFLNEVLVKLPTDPSGDEPIFHISHIDR	5	781.198												32545												96.9
934	932	Adaptor/scaffold	Itsn1	ITSN1	1511	Intersectin-1	Q9Z0R4	http://www.phosphosite.org/proteinAction.do?id=6575&showAllSites=true	194.2	LQYKMYKtPIFLNEV			MYKT*PIFLNEVLVKLPTDPSGDEPIFHISHIDR	5	781.198											32894												97.0509
935	933	Adaptor/scaffold	Itsn1	ITSN1	1578	Intersectin-1	Q9Z0R4	http://www.phosphosite.org/proteinAction.do?id=6575&showAllSites=true	194.2	KKKREKAyLVRSQRA			EKAY*LVR	2	479.742						9454			9456			9221						34.0575			34.4059			34.266						1.2765			1.0805
936	934	Adaptor/scaffold	Itsn1;Itsn1	ITSN1;ITSN1 iso 2	§1125;§1125	Intersectin-1	Q9Z0R4;Q9Z0R4-2	http://www.phosphosite.org/proteinAction.do?id=6575&showAllSites=true	194.2	IGWFPANyVKLLSPG			QIGWFPANY*VK	2	701.831	28688	28923	28476	28451	28838	28785	28360	28672	28603	28666	28734	28375	86.4265	85.6061	86.1505	85.6793	86.0594	85.7183	85.9937	85.8133	85.8913	85.7942	85.8528	85.7303	1.6163	2.7963	2.4091	2.9218	3.0992	2.8972	2.8702	2.6798	2.3248	2.993
937	935	Adaptor/scaffold	Itsn1;Itsn1	ITSN1;ITSN1 iso 2	§1125;§1125	Intersectin-1	Q9Z0R4;Q9Z0R4-2	http://www.phosphosite.org/proteinAction.do?id=6575&showAllSites=true	194.2	IGWFPANyVKLLSPG			QIGWFPANY*VK	2	701.831			28443												86.0512												2.6498
938	936	Adaptor/scaffold	Itsn1;Itsn1	ITSN1;ITSN1 iso 2	1157;1157	Intersectin-1	Q9Z0R4;Q9Z0R4-2	http://www.phosphosite.org/proteinAction.do?id=6575&showAllSites=true	194.2	VCQVIGMyDYTAQND			TAVQPAVCQVIGMY*DYTAQNDDELAFSK	3	1072.14		30486						30148						89.7959						89.7684						3.3913						4.6302
939	937	Adaptor/scaffold	Itsn1;Itsn2	ITSN1;ITSN2	1509;1451	Intersectin-1	Q9Z0R4;Q9Z0R6	http://www.phosphosite.org/proteinAction.do?id=6575&showAllSites=true	194.2	SNLQYKMyKTPIFLN			MY*KTPIFLNEVLVK	3	592.312												29290												88.1642
940	938	Adaptor/scaffold	Itsn2;Itsn2	ITSN2;Q9CQD9 iso 2	§554;554	Intersectin-2	Q9Z0R6;Q9Z0R6-2	http://www.phosphosite.org/proteinAction.do?id=2736&showAllSites=true	188.8	EYQNKLIyLVPEKQL			LIY*LVPEK	2	527.783	25238	25486		25011				25197					77.0919	76.384		76.4408				76.4879					1.5752	2.3628		1.9705				2.3128
941	939	Adaptor/scaffold	Itsn2;Itsn2	ITSN2;Q9CQD9 iso 2	§554;554	Intersectin-2	Q9Z0R6;Q9Z0R6-2	http://www.phosphosite.org/proteinAction.do?id=2736&showAllSites=true	188.8	EYQNKLIyLVPEKQL			LIY*LVPEKQLLNER	3	603.329	27853	27980		27515	27996	27850		27736		27791		27505	84.1888	83.0841		83.1838	83.8115	83.2393		83.311		83.4643		83.389	2.2837	3.7732		3.4312	2.7984	3.5681		3.3408		3.3339
942	940	Adaptor/scaffold	Itsn2;Itsn2	ITSN2;Q9CQD9 iso 2	§922;922	Intersectin-2	Q9Z0R6;Q9Z0R6-2	http://www.phosphosite.org/proteinAction.do?id=2736&showAllSites=true	188.8	RGEPEALyAAVTKKP			LIPGNEVQRGEPEALY*AAVTK	3	779.061											22422												68.8809
943	941	Adaptor/scaffold	Itsn2;Itsn2	ITSN2;Q9CQD9 iso 2	263;263	Intersectin-2	Q9Z0R6;Q9Z0R6-2	http://www.phosphosite.org/proteinAction.do?id=2736&showAllSites=true	188.8	LDKGMSGyLSGFQAR			FNSLDKGMSGY*LSGFQAR	3	686.643											23743												72.458
944	942	Adaptor/scaffold	Itsn2;Itsn2	ITSN2;Q9CQD9 iso 2	39;39	Intersectin-2	Q9Z0R6;Q9Z0R6-2	http://www.phosphosite.org/proteinAction.do?id=2736&showAllSites=true	188.8	NLKPSGGyITGDQAR			HDKQFDNLKPSGGY*ITGDQAR	4	607.533				13327		13516										44.9493		44.9153										1.4408		2.7839
945	943	Adaptor/scaffold	Itsn2;Itsn2	ITSN2;Q9CQD9 iso 2	39;39	Intersectin-2	Q9Z0R6;Q9Z0R6-2	http://www.phosphosite.org/proteinAction.do?id=2736&showAllSites=true	188.8	NLKPSGGyITGDQAR			QFDNLKPSGGY*ITGDQAR	3	682.981								16950												54.3759												2.3169
946	944	Adaptor/scaffold	Itsn2;Itsn2	ITSN2;Q9CQD9 iso 2	39;39	Intersectin-2	Q9Z0R6;Q9Z0R6-2	http://www.phosphosite.org/proteinAction.do?id=2736&showAllSites=true	188.8	NLKPSGGyITGDQAR			TKHDKQFDNLKPSGGY*ITGDQAR	4	664.818	12159				12037	11908							41.2957				40.9829	40.6328							3.1597				5.3706	4.8861
947	945	Adaptor/scaffold	Lamtor1	LAMTOR1	§138	Ragulator complex protein LAMTOR1	Q9CQ22	http://www.phosphosite.org/proteinAction.do?id=6785&showAllSites=true	17.7	QVSRIAAyAYSALSQ			IAAY*AYSALSQIR	2	753.871		25718									25490			77.0007									77.1209			2.0401
948	946	Adaptor/scaffold	Lpp;Lpp;Lpp	LPP;LPP iso 4;LPP iso 5	§245;120;§245	Lipoma-preferred partner homolog	Q8BFW7;Q8BFW7-4;Q8BFW7-5	http://www.phosphosite.org/proteinAction.do?id=2765&showAllSites=true	65.8	GPSSGQIyGPGPRGY	PTP1B		SAQPSPHYMAGPSSGQIY*GPGPR	3	808.026		16444												52.199												4.1164
949	947	Adaptor/scaffold	Lpp;Lpp;Lpp	LPP;LPP iso 4;LPP iso 5	221, §235, 241;96, 110, §116;221, §235, 241	Lipoma-preferred partner homolog	Q8BFW7;Q8BFW7-4;Q8BFW7-5	http://www.phosphosite.org/proteinAction.do?id=2765&showAllSites=true	65.8	ASTSSRPtFNVQVKS;SAQPSPHyMAGPSSG;HYMAGPSsGQIYGPG			KPQPQPVPASYTTASTSSRPT*FNVQVKSAQPSPHY*MAGPSS*GQIYGPGPR	6	914.09	34567												102.389												1.0303
950	948	Adaptor/scaffold	Madd;Madd;Madd;Madd;Madd;Madd;Madd;Madd;Madd;Madd;Madd;Madd;Madd	MADD iso10;MADD;MADD iso10;MADD iso10;MADD iso10;MADD iso10;MADD iso10;MADD iso10;MADD iso10;MADD iso10;MADD iso10;MADD iso10;MADD iso10	1386;1405;1406;1386;1367;1322;1318;1348;1347;1303;1294;1328;1402	MAP kinase-activating death domain protein	Q80U28-1;Q80U28;Q80U28-2;Q80U28-3;Q80U28-4;Q80U28-5;Q80U28-6;Q80U28-7;Q80U28-8;Q80U28-9;Q80U28-1;Q80U28-1;Q80U28-1	http://www.phosphosite.org/proteinAction.do?id=10043407&showAllSites=true	181	KSHIGLVySQQVNEV			SHIGLVY*SQQVNEVLDQLNSLNGR	3	921.787		34627		34164		34503		34351		34379		34100		100.921		100.973		100.997		101.041		101.117		101.101		2.8741		2.0584		3.2795		3.8107		4.0184
951	949	Adaptor/scaffold	Magi2;Magi2;Magi2	AIP1;AIP1 iso4;AIP1 iso4	§1245;1082;1068	Membrane-associated guanylate kinase, WW and PDZ domain-containing protein 2	Q9WVQ1;Q9WVQ1-2;Q9WVQ1-4	http://www.phosphosite.org/proteinAction.do?id=3987&showAllSites=true	140.8	MKSDKHGsPYFYLLG			SDKHGS*PYFYLLGHPK	4	482.229			19706												62.5031												2.2221
952	950	Adaptor/scaffold	Magi2;Magi2;Magi2	AIP1;AIP1 iso4;AIP1 iso4	§361;198;198	Membrane-associated guanylate kinase, WW and PDZ domain-containing protein 2	Q9WVQ1;Q9WVQ1-2;Q9WVQ1-4	http://www.phosphosite.org/proteinAction.do?id=3987&showAllSites=true	140.8	EKIDDPIyGTYYVDH			AKPPEECKENELPYGWEKIDDPIY*GTYYVDHINR	4	1055.48		25722									25552			77.0102									77.2845			2.0375
953	951	Adaptor/scaffold	Magi2;Magi2;Magi2	AIP1;AIP1 iso4;AIP1 iso4	§361;198;198	Membrane-associated guanylate kinase, WW and PDZ domain-containing protein 2	Q9WVQ1;Q9WVQ1-2;Q9WVQ1-4	http://www.phosphosite.org/proteinAction.do?id=3987&showAllSites=true	140.8	EKIDDPIyGTYYVDH			AKPPEECKENELPYGWEKIDDPIY*GTYYVDHINR	5	844.589			25296	25262		25542		25442				25212			77.6068	77.1079		77.0598		77.1383				77.2244			2.9255	3.183		5.6851		4.0107
954	952	Adaptor/scaffold	Magi2;Magi2;Magi2	AIP1;AIP1 iso4;AIP1 iso4	§361;198;198	Membrane-associated guanylate kinase, WW and PDZ domain-containing protein 2	Q9WVQ1;Q9WVQ1-2;Q9WVQ1-4	http://www.phosphosite.org/proteinAction.do?id=3987&showAllSites=true	140.8	EKIDDPIyGTYYVDH			AKPPEECKENELPYGWEKIDDPIY*GTYYVDHINRR	5	875.809	24164	24276	23919	23822	24325	24120	23785		24095	24050	24161	23799	74.169	73.1567	73.8871	73.2493	73.9555	73.2492	73.7359		73.8091	73.4196	73.5766	73.4476	4.7883	5.8524	4.2901	5.6197	4.2952	5.5445	5.6523		2.8856	5.699
955	953	Adaptor/scaffold	Magi2;Magi2;Magi2	AIP1;AIP1 iso4;AIP1 iso4	§361;198;198	Membrane-associated guanylate kinase, WW and PDZ domain-containing protein 2	Q9WVQ1;Q9WVQ1-2;Q9WVQ1-4	http://www.phosphosite.org/proteinAction.do?id=3987&showAllSites=true	140.8	EKIDDPIyGTYYVDH			AKPPEECKENELPYGWEKIDDPIY*GTYYVDHINRR	5	875.809					24265	24123			24025	24058							73.7982	73.2585			73.62	73.4408							5.8098	5.8634			5.431	5.5643
956	954	Adaptor/scaffold	Magi2;Magi2;Magi2	AIP1;AIP1 iso4;AIP1 iso4	§361;198;198	Membrane-associated guanylate kinase, WW and PDZ domain-containing protein 2	Q9WVQ1;Q9WVQ1-2;Q9WVQ1-4	http://www.phosphosite.org/proteinAction.do?id=3987&showAllSites=true	140.8	EKIDDPIyGTYYVDH			AKPPEECKENELPYGWEKIDDPIY*GTYYVDHINRR	6	730.009	24144	24282	23931	23832	24264	24115	23784	24039	24093	24060	24169	23798	74.1143	73.1716	73.9177	73.2736	73.7955	73.237	73.7315	73.387	73.802	73.4458	73.5959	73.4432	3.1968	7.9362	5.5745	6.8786	6.2671	6.8186	6.3142	6.4083	3.8349	6.7814
957	955	Adaptor/scaffold	Magi2;Magi2;Magi2	AIP1;AIP1 iso4;AIP1 iso4	§361;198;198	Membrane-associated guanylate kinase, WW and PDZ domain-containing protein 2	Q9WVQ1;Q9WVQ1-2;Q9WVQ1-4	http://www.phosphosite.org/proteinAction.do?id=3987&showAllSites=true	140.8	EKIDDPIyGTYYVDH			AKPPEECKENELPYGWEKIDDPIY*GTYYVDHINRR	6	730.009			23941						24033						73.9482						73.6417						6.4226						6.5662
958	956	Adaptor/scaffold	Magi2;Magi2;Magi2	AIP1;AIP1 iso4;AIP1 iso4	§361;198;198	Membrane-associated guanylate kinase, WW and PDZ domain-containing protein 2	Q9WVQ1;Q9WVQ1-2;Q9WVQ1-4	http://www.phosphosite.org/proteinAction.do?id=3987&showAllSites=true	140.8	EKIDDPIyGTYYVDH			ENELPYGWEKIDDPIY*GTYYVDHINRR	4	859.648									27176			26944									82.0605			81.85									3.2917
959	957	Adaptor/scaffold	Magi2;Magi2;Magi2	AIP1;AIP1 iso4;AIP1 iso4	§361;198;198	Membrane-associated guanylate kinase, WW and PDZ domain-containing protein 2	Q9WVQ1;Q9WVQ1-2;Q9WVQ1-4	http://www.phosphosite.org/proteinAction.do?id=3987&showAllSites=true	140.8	EKIDDPIyGTYYVDH			IDDPIY*GTYYVDHINR	3	678.638	23733	23992	23510	23544	23888	23833	23431	23718	23639	23741	23796	23451	73.0223	72.3991	72.792	72.4976	72.7889	72.4887	72.7931	72.538	72.5957	72.6014	72.6033	72.5177	3.6366	5.1461	4.3754	4.7924	4.6194	5.4621	4.2673	4.9225	4.8648	4.8562
960	958	Adaptor/scaffold	Magi2;Magi2;Magi2	AIP1;AIP1 iso4;AIP1 iso4	§361;198;198	Membrane-associated guanylate kinase, WW and PDZ domain-containing protein 2	Q9WVQ1;Q9WVQ1-2;Q9WVQ1-4	http://www.phosphosite.org/proteinAction.do?id=3987&showAllSites=true	140.8	EKIDDPIyGTYYVDH			IDDPIY*GTYYVDHINRR	2	1095.5		21637												66.1072												1.2267
961	959	Adaptor/scaffold	Magi2;Magi2;Magi2	AIP1;AIP1 iso4;AIP1 iso4	§361;198;198	Membrane-associated guanylate kinase, WW and PDZ domain-containing protein 2	Q9WVQ1;Q9WVQ1-2;Q9WVQ1-4	http://www.phosphosite.org/proteinAction.do?id=3987&showAllSites=true	140.8	EKIDDPIyGTYYVDH			IDDPIY*GTYYVDHINRR	3	730.672	21627	21594	21184	21156	21564	21419	21057	21329	21319	21362	21456	21290	67.2887	65.9924	66.4758	66.0872	66.5547	66.0476	66.4015	66.1467	66.3617	66.2494	66.2913	66.7062	2.2955	4.1363	2.7408	3.6809	3.5809	3.241	3.9463	3.8893	3.0461	3.4213
962	960	Adaptor/scaffold	Magi2;Magi2;Magi2	AIP1;AIP1 iso4;AIP1 iso4	§361;198;198	Membrane-associated guanylate kinase, WW and PDZ domain-containing protein 2	Q9WVQ1;Q9WVQ1-2;Q9WVQ1-4	http://www.phosphosite.org/proteinAction.do?id=3987&showAllSites=true	140.8	EKIDDPIyGTYYVDH			IDDPIY*GTYYVDHINRR	3	730.672	21451		21385								21653	21090	66.783		67.0162								66.8183	66.1759	2.5666		1.5007
963	961	Adaptor/scaffold	Magi2;Magi2;Magi2	AIP1;AIP1 iso4;AIP1 iso4	§361;198;198	Membrane-associated guanylate kinase, WW and PDZ domain-containing protein 2	Q9WVQ1;Q9WVQ1-2;Q9WVQ1-4	http://www.phosphosite.org/proteinAction.do?id=3987&showAllSites=true	140.8	EKIDDPIyGTYYVDH			IDDPIY*GTYYVDHINRR	4	548.256	21466	21615	21208	21173	21586	21438	21085	21343	21345	21395	21476	21118	66.8234	66.0478	66.5396	66.1389	66.6136	66.0979	66.4745	66.185	66.4303	66.3359	66.3432	66.2498	2.7923	4.4908	4.4272	4.8588	5.2383	5.5882	4.9278	5.0466	4.1231	5.0952
964	962	Adaptor/scaffold	Magi2;Magi2;Magi2	AIP1;AIP1 iso4;AIP1 iso4	§361;198;198	Membrane-associated guanylate kinase, WW and PDZ domain-containing protein 2	Q9WVQ1;Q9WVQ1-2;Q9WVQ1-4	http://www.phosphosite.org/proteinAction.do?id=3987&showAllSites=true	140.8	EKIDDPIyGTYYVDH			KAKPPEECKENELPYGWEKIDDPIY*GTYYVDHINR	5	870.208					24410												74.1853												3.9576
965	963	Adaptor/scaffold	Magi2;Magi2;Magi2	AIP1;AIP1 iso4;AIP1 iso4	§361;198;198	Membrane-associated guanylate kinase, WW and PDZ domain-containing protein 2	Q9WVQ1;Q9WVQ1-2;Q9WVQ1-4	http://www.phosphosite.org/proteinAction.do?id=3987&showAllSites=true	140.8	EKIDDPIyGTYYVDH			PIY*GTYYVDHINRR	3	616.293	17235	17229	16892	16808	17208	17044	16744	16998	16982	16978	17138	16743	55.2793	54.3004	54.8881	54.3982	54.8592	54.3623	54.7635	54.5044	54.7453	54.4886	54.6714	54.5441	1.1701	2.6862	1.9263	2.3846	2.289	2.2074	1.8387	2.5569	1.7735	2.02
966	964	Adaptor/scaffold	Magi2;Magi2;Magi2	AIP1;AIP1 iso4;AIP1 iso4	1247;1084;1070	Membrane-associated guanylate kinase, WW and PDZ domain-containing protein 2	Q9WVQ1;Q9WVQ1-2;Q9WVQ1-4	http://www.phosphosite.org/proteinAction.do?id=3987&showAllSites=true	140.8	SDKHGSPyFYLLGHP			HGSPY*FYLLGHPK	3	532.585	22342										22285		69.2255										68.515		1.7851
967	965	Adaptor/scaffold	Magi2;Magi2;Magi2	AIP1;AIP1 iso4;AIP1 iso4	1247;1084;1070	Membrane-associated guanylate kinase, WW and PDZ domain-containing protein 2	Q9WVQ1;Q9WVQ1-2;Q9WVQ1-4	http://www.phosphosite.org/proteinAction.do?id=3987&showAllSites=true	140.8	SDKHGSPyFYLLGHP			SDKHGSPY*FYLLGHPK	3	642.636		19897		19494		19752					19876			61.4428		61.6098		61.5913					62.0479			5.9942		3.0718		4.4301
968	966	Adaptor/scaffold	Magi2;Magi2;Magi2	AIP1;AIP1 iso4;AIP1 iso4	1247;1084;1070	Membrane-associated guanylate kinase, WW and PDZ domain-containing protein 2	Q9WVQ1;Q9WVQ1-2;Q9WVQ1-4	http://www.phosphosite.org/proteinAction.do?id=3987&showAllSites=true	140.8	SDKHGSPyFYLLGHP			SDKHGSPY*FYLLGHPK	4	482.229	19980	19892			20010	19749	19516			19718	19877	19493	62.8228	61.4306			62.3844	61.5842	62.2805			61.8341	62.0502	61.9148	2.3787	3.5643			3.7283	3.4781	3.4356			3.3523
969	967	Adaptor/scaffold	Magi2;Magi2;Magi2	AIP1;AIP1 iso4;AIP1 iso4	363;200;200	Membrane-associated guanylate kinase, WW and PDZ domain-containing protein 2	Q9WVQ1;Q9WVQ1-2;Q9WVQ1-4	http://www.phosphosite.org/proteinAction.do?id=3987&showAllSites=true	140.8	IDDPIYGtYYVDHIN			AKPPEECKENELPYGWEKIDDPIYGT*YYVDHINR	5	844.589											25602												77.415
970	968	Adaptor/scaffold	Magi2;Magi2;Magi2	AIP1;AIP1 iso4;AIP1 iso4	363;200;200	Membrane-associated guanylate kinase, WW and PDZ domain-containing protein 2	Q9WVQ1;Q9WVQ1-2;Q9WVQ1-4	http://www.phosphosite.org/proteinAction.do?id=3987&showAllSites=true	140.8	IDDPIYGtYYVDHIN			ENELPYGWEKIDDPIYGT*YYVDHINRR	4	859.648											27297												81.9594
971	969	Adaptor/scaffold	Magi2;Magi2;Magi2	AIP1;AIP1 iso4;AIP1 iso4	363;200;200	Membrane-associated guanylate kinase, WW and PDZ domain-containing protein 2	Q9WVQ1;Q9WVQ1-2;Q9WVQ1-4	http://www.phosphosite.org/proteinAction.do?id=3987&showAllSites=true	140.8	IDDPIYGtYYVDHIN			KAKPPEECKENELPYGWEKIDDPIYGT*YYVDHINR	5	870.208	24293												74.5142												1.9854
972	970	Adaptor/scaffold	Magi2;Magi2;Magi2	AIP1;AIP1 iso4;AIP1 iso4	365;202;202	Membrane-associated guanylate kinase, WW and PDZ domain-containing protein 2	Q9WVQ1;Q9WVQ1-2;Q9WVQ1-4	http://www.phosphosite.org/proteinAction.do?id=3987&showAllSites=true	140.8	DPIYGTYyVDHINRR			AKPPEECKENELPYGWEKIDDPIYGTYY*VDHINRR	4	1094.51	24192	24290		23842	24323		23782						74.2434	73.193		73.3024	73.9506		73.7264						1.8427	3.5141		3.8554	2.6845		2.5497
973	971	Adaptor/scaffold	Magi2;Magi2;Magi2	AIP1;AIP1 iso4;AIP1 iso4	365;202;202	Membrane-associated guanylate kinase, WW and PDZ domain-containing protein 2	Q9WVQ1;Q9WVQ1-2;Q9WVQ1-4	http://www.phosphosite.org/proteinAction.do?id=3987&showAllSites=true	140.8	DPIYGTYyVDHINRR			AKPPEECKENELPYGWEKIDDPIYGTYY*VDHINRR	4	1094.51		24328												73.2957												2.4705
974	972	Adaptor/scaffold	Magi2;Magi2;Magi2	AIP1;AIP1 iso4;AIP1 iso4	365;202;202	Membrane-associated guanylate kinase, WW and PDZ domain-containing protein 2	Q9WVQ1;Q9WVQ1-2;Q9WVQ1-4	http://www.phosphosite.org/proteinAction.do?id=3987&showAllSites=true	140.8	DPIYGTYyVDHINRR			AKPPEECKENELPYGWEKIDDPIYGTYY*VDHINRR	5	875.809							23849												73.9066												2.1797
975	973	Adaptor/scaffold	Magi2;Magi2;Magi2;Magi2	AIP1;AIP1 iso4;AIP1 iso4;AIP1 iso4	§826;663;649;436	Membrane-associated guanylate kinase, WW and PDZ domain-containing protein 2	Q9WVQ1;Q9WVQ1-2;Q9WVQ1-4;Q9WVQ1-3	http://www.phosphosite.org/proteinAction.do?id=3987&showAllSites=true	140.8	HPGDELVyVDGIPVA			LHPGDELVY*VDGIPVAGK	3	653.659									25758	25821		25559									78.2466	78.1622		78.1454									2.7503	3.6776
976	974	Adaptor/scaffold	Magi2;Magi2;Magi2;Magi2	AIP1;AIP1 iso4;AIP1 iso4;AIP1 iso4	§826;663;649;436	Membrane-associated guanylate kinase, WW and PDZ domain-containing protein 2	Q9WVQ1;Q9WVQ1-2;Q9WVQ1-4;Q9WVQ1-3	http://www.phosphosite.org/proteinAction.do?id=3987&showAllSites=true	140.8	HPGDELVyVDGIPVA			LHPGDELVY*VDGIPVAGK	3	653.659									25742												78.204												3.8427
977	975	Adaptor/scaffold	Magi2;Magi2;Magi2;Magi2	AIP1;AIP1 iso4;AIP1 iso4;AIP1 iso4	543;380;380;153	Membrane-associated guanylate kinase, WW and PDZ domain-containing protein 2	Q9WVQ1;Q9WVQ1-2;Q9WVQ1-4;Q9WVQ1-3	http://www.phosphosite.org/proteinAction.do?id=3987&showAllSites=true	140.8	MVNGRHNyETYLEYI			HNY*ETYLEYISR	2	834.359		24190												72.9271												1.9723
978	976	Adaptor/scaffold	Magi2;Magi2;Magi2;Magi2	AIP1;AIP1 iso4;AIP1 iso4;AIP1 iso4	543;380;380;153	Membrane-associated guanylate kinase, WW and PDZ domain-containing protein 2	Q9WVQ1;Q9WVQ1-2;Q9WVQ1-4;Q9WVQ1-3	http://www.phosphosite.org/proteinAction.do?id=3987&showAllSites=true	140.8	MVNGRHNyETYLEYI			HNY*ETYLEYISR	3	556.575											24024	23681											73.2066	73.1296
979	977	Adaptor/scaffold	Magi2;Magi2;Magi2;Magi2	AIP1;AIP1 iso4;AIP1 iso4;AIP1 iso4	546;383;383;156	Membrane-associated guanylate kinase, WW and PDZ domain-containing protein 2	Q9WVQ1;Q9WVQ1-2;Q9WVQ1-4;Q9WVQ1-3	http://www.phosphosite.org/proteinAction.do?id=3987&showAllSites=true	140.8	GRHNYETyLEYISRT			HNYETY*LEYISR	2	834.359	24871	25077		24625				24802		24817	24923	24547	76.0895	75.3009		75.4051				75.4325		75.4815	75.6063	75.4539	2.6039	3.8679		2.5981				3.3346		3.7987
980	978	Adaptor/scaffold	Magi2;Magi2;Magi2;Magi2	AIP1;AIP1 iso4;AIP1 iso4;AIP1 iso4	546;383;383;156	Membrane-associated guanylate kinase, WW and PDZ domain-containing protein 2	Q9WVQ1;Q9WVQ1-2;Q9WVQ1-4;Q9WVQ1-3	http://www.phosphosite.org/proteinAction.do?id=3987&showAllSites=true	140.8	GRHNYETyLEYISRT			HNYETY*LEYISR	3	556.575		25082	24615	24624					24797		24927	24551		75.3153	75.7655	75.4027					75.6856		75.6159	75.4656		3.6541	2.6235	3.1746					2.5835
981	979	Adaptor/scaffold	Magi2;Magi2;Magi2;Magi2	AIP1;AIP1 iso4;AIP1 iso4;AIP1 iso4	742;579;579;352	Membrane-associated guanylate kinase, WW and PDZ domain-containing protein 2	Q9WVQ1;Q9WVQ1-2;Q9WVQ1-4;Q9WVQ1-3	http://www.phosphosite.org/proteinAction.do?id=3987&showAllSites=true	140.8	DPRKPDPyELYEKSR			KPDPY*ELYEK	2	681.305											13420	12998											44.5731	44.4076
982	980	Adaptor/scaffold	Magi2;Magi2;Magi2;Magi2	AIP1;AIP1 iso4;AIP1 iso4;AIP1 iso4	742;579;579;352	Membrane-associated guanylate kinase, WW and PDZ domain-containing protein 2	Q9WVQ1;Q9WVQ1-2;Q9WVQ1-4;Q9WVQ1-3	http://www.phosphosite.org/proteinAction.do?id=3987&showAllSites=true	140.8	DPRKPDPyELYEKSR			KPDPY*ELYEK	2	681.305											13396												44.5088
983	981	Adaptor/scaffold	Magi2;Magi2;Magi2;Magi2	AIP1;AIP1 iso4;AIP1 iso4;AIP1 iso4	745;582;582;355	Membrane-associated guanylate kinase, WW and PDZ domain-containing protein 2	Q9WVQ1;Q9WVQ1-2;Q9WVQ1-4;Q9WVQ1-3	http://www.phosphosite.org/proteinAction.do?id=3987&showAllSites=true	140.8	KPDPYELyEKSRAIY			KPDPYELY*EK	2	681.305	13517												45.0271												1.2039
984	982	Adaptor/scaffold	Mpp2;Mpp2	MPP2;MPP2 iso 2	399;416	MAGUK p55 subfamily member 2	Q9WV34;Q9WV34-2	http://www.phosphosite.org/proteinAction.do?id=12958&showAllSites=true	61.5	SEREGQGySFVSRGE			DSEREGQGY*SFVSR	3	566.237												11914												41.4963
985	983	Adaptor/scaffold	Mpp2;Mpp2	MPP2;MPP2 iso 2	399;416	MAGUK p55 subfamily member 2	Q9WV34;Q9WV34-2	http://www.phosphosite.org/proteinAction.do?id=12958&showAllSites=true	61.5	SEREGQGySFVSRGE			EGQGY*SFVSR	2	605.25											13860												45.7494
[truncated: 7,967 more rows]
[truncated: 65 more columns]

## Sheet: Phosphoscan_Raw_Summary
		Normalized Fold Change	p value															Normalized Abundance												Average Abundance								% CV								Raw Ratio	Log2 Ratio	Normalized Log2 Ratio	Raw Fold Change
[truncated: 3,994 more rows]
[truncated: 5 more columns]

## Sheet: Phosphoscan_Column definition
Column Name	Definition	In Details	In Summary
[truncated: 20 more rows]

## Sheet: Sorted(P <0.05, FC>1.5) & SYNGO
TOTAL	TOTAL		UP	UP		DOWN	DOWN		TOTAL_SYN	TOTAL_PRE	TOTAL_POST		UP_SYN	UP_PRE	UP_POST		DOWN_SYN	DOWN_PRE	DOWN_POST
[truncated: 81 more rows]

[truncated: 4 more sheets: David analysis_TOP 5 terms each, DAVID analysis_CC_Raw, DAVID analysis_MF_Raw, DAVID analysis_BP_Raw]
