# Supplementary material for: Presynaptic PTPσ regulates postsynaptic NMDA receptor function through direct adhesion-independent mechanisms
Source: eLife. 2020 Mar 6;9:e54224. doi: 10.7554/eLife.54224 (PMC7069723; doi:10.7554/eLife.54224)
Supplement: Supplementary file 3. [file elife-54224-supp3.xlsx]

## Sheet: Statistics
Supplementary Table 1. Statistical analysis
Figure		Assay Performed	Parameter (Unit)	Comparison			N	Descriptive Statistics	Statistical Analysis					Column statistics
				Sex	Age	groups		Average ± SEM	Statistical Test		Significance			D'Agostino & Pearson normality test	Shapiro-Wilk normality test
1	A	CA1 Pyramidal miniature EPSC	Frequency (Hz)	M+F	P18-22	WT, cKO	27(6), 28(7)	WT = 0.14 ± 0.012	Mann-Whitney test	WT vs cKO	P = 0.7658	U = 414	Two-tailed	P = 0.0328, *	P = 0.0457, *
								cKO = 0.14 ± 0.015						P = 0.027, *
			Amplitude (pA)					WT = 21 ± 0.71	Mann-Whitney test	WT vs cKO	P = 0.7070	U = 355	Two-tailed	P = 0.0003, ***	P = 0.0014, **
								cKO = 21 ± 0.75						P = 0.0065, **	P < 0.0001, ****
	B	CA1 Pyramidal miniature IPSC	Frequency (Hz)	M+F	P18-22	WT, cKO	18(4), 20(4)	WT = 12.27 ± 1.251	Unpaired Student's t-test (Welch's correction)	WT vs cKO	P = 0.4659	t=0.7421, df=21.79	Two-tailed
								cKO = 11.84 ± 0.7455
			Amplitude (pA)					WT = 31.05 ± 2.064	Unpaired Student's t-test	WT vs cKO	P = 0.4659	t(36) = 0.305	Two-tailed
								cKO = 29.41 ± 0.779
	C	Hippocampus SC-CA1 Input-Output Ratio	fEPSP Slope (mV/ms)	M+F	P26-30	WT, cKO	14(5), 14(6)	2-way ANOVA		Interaction :: P = 0.9609, n.s., DF=5 FV Amplitude :: P < 0.0001, ****, DF = 5 Genotype :: P = 0.8342, n.s., DF = 1
								Sidak's multiple comparison test	0.05 mV	WT vs cKO	P > 0.9999, n.s.
									0.1 mV	WT vs cKO	P > 0.9999, n.s.
									0.15 mV	WT vs cKO	P > 0.9999, n.s.
									0.2 mV	WT vs cKO	P > 0.9999, n.s.
									0.25 mV	WT vs cKO	P = 0.9997, n.s.
									0.3 mV	WT vs cKO	p = 0.9951, n.s.
	D	Hippocampus SC-CA1 Paired-Pulse Ratio	% Facilitation (%)	M+F	P26-30	WT, cKO	17(5), 15(5)	2-way ANOVA		Interaction :: P = 0.7439, n.s., DF=5 Inter-Stimulus Interval :: P < 0.0001, ****, DF = 5 Genotype :: P = 0.5882, n.s., DF = 1
								Sidak's multiple comparison test	25 ms	WT vs cKO	P > 0.9999, n.s.
									50 ms	WT vs cKO	P = 0.9973, n.s.
									75 ms	WT vs cKO	P = 0.9929, n.s.
									100 ms	WT vs cKO	P = 0.9857, n.s.
									200 ms	WT vs cKO	P = 0.8942, n.s.
									300 ms	WT vs cKO	P > 0.9999, n.s.
	E	Hipopcampus SC-CA1 High-Frequency Stimulation LTP	Last 5 min fEPSP slope (% of baseline)	M+F	P26-32	WT, cKO	11(6), 11(6)	WT = 143 ± 3.6	Unpaired Student's t-test	WT vs cKO	P = 0.0263, *	t(20) =2.399	Two-tailed
								cKO = 124 ± 7.8
	F	Hipopcampus SC-CA1 Theta-Burst Stimulation LTP	Last 5 min fEPSP slope (% of baseline)	M+F	P26-32	WT, cKO	11(4), 9(4)	WT = 141 ± 6.5	Unpaired Student's t-test	WT vs cKO	P = 0.0035, **	t(18) = 3.362	Two-tailed
								cKO = 114 ± 3.9
	G	Hipopcampus SC-CA1 Low-Frequency Stimulation LTD	Last 5 min fEPSP slope (% of baseline)	M+F	P16-19	WT, cKO	11(6), 10(5)	WT = 70 ± 4.3	Unpaired Student's t-test	WT vs cKO	P = 0.0196, *	t(19) = 0.0196	Two-tailed
								cKO = 86 ± 4.5
	H	Hipopcampus SC-CA1 mGluR-dependent LTD	Last 5 min fEPSP slope (% of baseline)	M+F	P16-19	WT, cKO	8(7), 8(6)	WT = 72.03 ± 9.014	Unpaired Student's t-test	WT vs cKO	P = 0.7645, n.s.	t(7) = 5.374	Two-tailed
								cKO = 75.03 ± 3.888
	I	Hippocampus SC-CA1 NMDA/AMPA Ratio	NMDA/AMPA Ratio	M+F	P18-23	WT, cKO	11(5), 12(5)	WT = 0.46 ± 0.085	Unpaired Student's t-test	WT vs cKO	P = 0.0321, *	t(11) = 3.22	Two-tailed
								cKO = 0.25 ± 0.045
			Decay Tau (ms)					WT = 102 ± 11	Mann-Whitney test	WT vs cKO	P = 0.0374, *	U = 32	Two-tailed	P < 0.0001, ****	P = 0.0295
								cKO = 82 ± 7.3						P < 0.0001, ****
	J	Western Blot Normalized by a-tub	HC, Lysate, GluN1 (a.u.)	M+F	P18-23	WT, cKO	7, 7	cKO = 0.9879 ± 0.09626	One sample t-test	WT vs cKO	P = 0.9039	t(6) = 0.1259	Two-tailed
			HC, Lysate, GluN2A (a.u.)	M+F	P18-23	WT, cKO	7, 7	cKO = 1.175 ± 0.06705	One sample t-test	WT vs cKO	P = 0.0401	t(6) = 02.611	Two-tailed
			HC, Lysate, GluN2B (a.u.)	M+F	P18-23	WT, cKO	7, 7	cKO = 1.001 ± 0..04126	One sample t-test	WT vs cKO	P = 0.9890	t(6) = 0.01438	Two-tailed
			HC, Lysate, GluA1 (a.u.)	M+F	P18-23	WT, cKO	7, 7	cKO = 0.973 ± 0.2103	One sample t-test	WT vs cKO	P = 0.9890	t(6) = 0.34	Two-tailed
			HC, P2, GluN1 (a.u.)	M+F	P18-23	WT, cKO	6, 4	cKO = 0.9016 ± 0.05475	One sample t-test	WT vs cKO	P = 0.1703	t(3) = 1.797	Two-tailed
			HC, P2, GluN2A (a.u.)	M+F	P18-23	WT, cKO	6, 4	cKO = 0.8081 ± 0.1126	One sample t-test	WT vs cKO	P = 0.1870	t(3) = 1.704	Two-tailed
			HC, P2, GluN2B (a.u.)	M+F	P18-23	WT, cKO	6, 4	cKO = 0.7343 ± 0.06852	One sample t-test	WT vs cKO	P = 0.0304, *	t(3) = 3.878	Two-tailed
			HC, P2, GluA1 (a.u.)	M+F	P18-23	WT, cKO	6, 4	cKO = 1.056 ± 0.1198	One sample t-test	WT vs cKO	P = 0.6714	t(3) = 0.4684	Two-tailed
			HC, PSD, GluN1 (a.u.)	M+F	P18-23	WT, cKO	3, 3	cKO = 0.7752 ± 0.07063	One sample t-test	WT vs cKO	P = 0.0862, n.s.	t(2) = 3.182	Two-tailed
			HC, PSD, GluN2A (a.u.)	M+F	P18-23	WT, cKO	3, 3	cKO = 0.8391 ± 0.04825	One sample t-test	WT vs cKO	P = 0.0794, n.s.	t(2) = 3.334	Two-tailed
			HC, PSD, GluN2B (a.u.)	M+F	P18-23	WT, cKO	3, 3	cKO = 0.7971 ± 0.035	One sample t-test	WT vs cKO	P = 0.0285, *	t(2) = 5.798	Two-tailed
			HC, PSD, GluA1 (a.u.)	M+F	P18-23	WT, cKO	3, 3	cKO = 1.032 ± 0.09997	One sample t-test	WT vs cKO	P = 0.7825, n.s.	t(2) = 0.3152	Two-tailed
	K	Hippocampus SC-CA1 NMDA/AMPA Ratio, DCS-rescue	NMDA/AMPA Ratio	M+F	P19-22	WT-V, WT-D, cKO-V, cKO-D	7(4), 7(3), 9(4), 9(4)	2-way ANOVA		Interaction :: P = 0.0044, **, DF=1 Drug vs Vehicle :: P = 0.2210, ns, DF=1 WT vs cKO :: P = 0.3701, ns, DF =1
								Sidak's multiple comparison test		WT-V vs WT-D	P = 0.7903, n.s.
										WT-V vs cKO-V	P = 0.0496, *
										WT-V vs cKO-D	P > 0.9999, n.s.
										cKO-V vs WT-D	P = 0.5881, n.s.
										cKO-V vs cKO-D	P = 0.0163, *
										WT-D vs cKO-D	P = 0.5771, n.s.
	L	Hippocampus SC-CA1 Theta-Burst Stimulation LTP, DCS-rescue	Last 5 min fEPSP slope (% of baseline)	M+F	P28-32	WT-V, WT-D, cKO-V, cKO-D	15(6), 9(3), 13(5), 10(3)	2-way ANOVA		Interaction :: P = 0.2005, n.s., DF=1 Drug vs Vehicle :: P = 0.0051, **, DF=1 WT vs cKO :: P = 0.0273, *, DF =1
								Sidak's multiple comparison test		WT-V vs WT-D	P = 0.8205, n.s.
										WT-V vs cKO-V	P = 0.0429, *
										WT-V vs cKO-D	P = 0.9974, n.s.
										cKO-V vs WT-D	P = 0.0049, **
										cKO-V vs cKO-D	P = 0.0257, *
										WT-D vs cKO-D	P = 0.9887, n.s.
2	B	Western Blot Normalized by a-tub	CA3, PTPs (a.u.)	M	3M	WT, cKO	5, 5	CA3-Cre = 0.4115 ± 0.08708	One sample t-test	CA3-eGFP vs CA3-Cre	P = 0.0025, **	t(4) = 6.758	Two-tailed
			CA1, PTPs (a.u.)				4, 3	CA1-Cre = 0.2613 ± 0.04284	One sample t-test	CA1-eGFP vs CA1-Cre	P = 0.0033, **	t(2) = 17.24	Two-tailed
	C	Hippocampus SC-CA1 Theta-Burst Stimulation LTP	Last 5 min fEPSP slope (% of baseline)	M+F	P28-32	CA3-eGFP, CA3-Cre, CA1-eGFP, CA1-Cre	8(5), 10(4), 10(4), 11(5),	2-way ANOVA		Interaction :: P = 0.0410, *, DF = 1 eGFP vs Cre :: P 0.0508, n.s., DF = 1 Genotype :: P = 0.5211, n.s., DF = 1
								Sidak's multiple comparison test		eGFP vs Cre in CA3	P = 0.0178, *
										eGFP vs Cre in CA1	P = 0.9964, n.s.
3	A	Hippocampus SC-CA1 Theta-Burst Stimulation LTP	Last 5 min fEPSP slope (% of baseline)	M+F	P28-32	WT-eGFP, cKO-eGFP, cKO-PTPRS(WT), cKO-PTPRS(4A), cKO-PTPRS(Y224S)	14(4), 13(5), 14(6), 11(4), 11(4)	1-way ANOVA		F(4,58) = 3.206, P=0.0191, *
								Dunnett's multiple comparison test		WT-eGFP vs cKO-eGFP	P = 0.0148, *
										WT-eGFP vs cKO-PTPRS(WT)	P = 0.9879, n.s.
										WT-eGFP vs cKO-PTPRS(4A)	P = 0.9893, n.s.
										WT-eGFP vs cKO-PTPRS(Y224S)	P = 0.9988, n.s.
								1-way ANOVA		F(3,45) = 4.035, P=0.0126, *
								Dunnett's multiple comparison test		cKO-eGFP vs cKO-PTPRS(WT)	P = 0.0263, *
										cKO-eGFP vs cKO-PTPRS(4A)	P = 0.0400, *
										cKO-eGFP vs cKO-PTPRS(Y224S)	P = 0.0095, **
	B	Hippocampus SC-CA1 Theta-Burst Stimulation LTP	Last 5 min fEPSP slope (% of baseline)	M+F	P28-32	WT-eGFP, cKO-eGFP, cKO-PTPRS(dIg12), cKO-PTPRS(dIg3), cKO-PTPRS(dFn12)	12(4), 13(4), 16(5), 20(6), 13(5)	1-way ANOVA		F(4,69) = 3.372, P=0.0140, *
								Dunnett's multiple comparison test		WT-eGFP vs cKO-eGFP	P = 0.0095, **
										WT-eGFP vs cKO-PTPRS(dIg12)	P = 0.8830, n.s.
										WT-eGFP vs cKO-PTPRS(dIg3)	P = 0.3839, n.s.
										WT-eGFP vs cKO-PTPRS(dFn12)	P = 0.9998, n.s.
								1-way ANOVA		F(3,58) = 3.426, P=0.0229, *
								Dunnett's multiple comparison test		cKO-eGFP vs cKO-PTPRS(dIg12)	P = 0.0356, *
										cKO-eGFP vs cKO-PTPRS(dIg3)	P = 0.1408, n.s.
										cKO-eGFP vs cKO-PTPRS(dFn12)	P = 0.0114, *
4	C	DAVID Analysis	refer to Supplementary file 1. PTM-Scan molecules list, sheet 'DAVID analysis_TOP 5 terms each'
	H	Western Blot, Relative protein Expression Normalized by WT and again Normalized by a-tub	HC, P2, PSD-95 (a.u.)	M	P21	WT, cKO	6, 6	cKO = 90.99 ± 12.41	One sample t-test	WT vs cKO	P = 0.5112, n.s.	t(5) = 0.7261	Two-tailed
			HC, P2, PSD-93 (a.u.)				6, 5	cKO =103.5 ± 31.49	One sample t-test	WT vs cKO	P = 0.9175, n.s.	t(4) = 0.9175	Two-tailed
			HC, P2, SynGAP (a.u.)				6, 5	cKO = 92.06 ± 21.11	One sample t-test	WT vs cKO	P = 0.7261, n.s.	t(4) = 0.3759	Two-tailed
			HC, P2, Shank3 (a.u.)				6, 6	cKO = 94.98 ± 12.8	One sample t-test	WT vs cKO	P = 0.7112, n.s.	t(5) = 0.392	Two-tailed
			HC, P2, liprina2 (a.u.)				6, 6	cKO = 91.22 ± 5.418	One sample t-test	WT vs cKO	P = 0.1661, n.s.	t(5) = 1.62	Two-tailed
			HC, P2, liprina3 (a.u.)				6, 6	cKO = 98.49 ± 9.632	One sample t-test	WT vs cKO	P = 0.8816, n.s.	t(5) = 0.1568	Two-tailed
			HC, P2, Trio (a.u.)				6, 5	cKO = 89.51 ± 11.52	One sample t-test	WT vs cKO	P = 0.4140, n.s.	t(4) = 0.9107	Two-tailed
			HC, P2, Caskin1 (a.u.)				6, 6	cKO = 117.4 ± 10.55	One sample t-test	WT vs cKO	P = 0.1598, n.s.	t(5) = 1.65	Two-tailed
			HC, P2, b-catenin (a.u.)				6, 6	cKO = 96.39 ± 10.91	One sample t-test	WT vs cKO	P = 0.7542, n.s.	t(5) = 0.3308	Two-tailed
			HC, P2, N-cadherin (a.u.)				6, 6	cKO = 107.7 ± 17.92	One sample t-test	WT vs cKO	P = 0.6854, n.s.	t(5) = 0.4296	Two-tailed
			HC, P2, TrkC (a.u.)				6, 5	cKO = 93.31 ± 11.83	One sample t-test	WT vs cKO	P = 0.6021, n.s.	t(4) = 0.5653	Two-tailed
			HC, P2, NGL-3 (a.u.)				6, 6	cKO = 125.6 ± 6.503	One sample t-test	WT vs cKO	P = 0.0111, *	t(5) = 3.931	Two-tailed
			HC, P2, SALM5 (a.u.)				6, 6	cKO = 90.39 ± 6.637	One sample t-test	WT vs cKO	P = 0.2071, n.s.	t(5) = 1.449	Two-tailed
5	A	Novel Object Recognition Test	Novel Preference (%)	M	2M	WT, cKO	16, 16	WT = 54.5 ± 2.434	Unpaired Student's t-test	WT vs cKO	P = 0.0479, *	t(15) = 2.171	Two-tailed
								cKO = 45.57 ± 3.586
	B	3-chamber test	Sniffing time (s)	M	2M	WT, cKO	19, 15	2-way ANOVA		Interaction :: P = 0.0664, n.s., DF = 1 O vs S1 :: P < 0.0001, ****, DF = 1 Genotype :: P = 0.0892, n.s., DF = 1
								Sidak's multiple comparison test	WT	S1 vs O	P < 0.0001, ****
									cKO	S1 vs O	P < 0.0001, ****
								2-way ANOVA		Interaction :: P = 0.3887, n.s., DF = 1 S1 vs S2 :: P = 0.0006, ***, DF = 1 Genotype :: P = 0.5469, n.s., DF = 1
								Sidak's multiple comparison test	WT	S1 vs S2	P = 0.0026, **
									cKO	S1 vs S2	P = 0.1126, n.s.
	C	5-consecutive days of 3-chamber test	Sniffing time to Social target (s)	M	2M	WT, cKO	20, 18	2-way ANOVA		Interaction :: P = 0.1467, n.s., DF = 4 Day :: P < 0.0001, ****, DF = 4 Genotype :: P = 0.0127, *, DF = 1
								Sidak's multiple comparison test	Day 1	WT vs cKO	P = 0.4355 , n.s.
									Day 2	WT vs cKO	P = 0.8499 , n.s.
									Day 3	WT vs cKO	P = 0.3235 , n.s.
									Day 4	WT vs cKO	P = 0.9985 , n.s.
									Day 5	WT vs cKO	P = 0.0038 , **
			Sniffing time to Empty target (s)					2-way ANOVA		Interaction :: P = 0.6099, n.s., DF = 4 Day :: P = 0.0682, n.s., DF = 4 Genotype :: P = 0.3528, n.s., DF = 1
								Sidak's multiple comparison test	Day 1	WT vs cKO	P = 0.592 , n.s.
									Day 2	WT vs cKO	P = 0.9969 , n.s.
									Day 3	WT vs cKO	P>0.9999 , n.s.
									Day 4	WT vs cKO	P>0.9999 , n.s.
									Day 5	WT vs cKO	P = 0.7315 , n.s.
			Time in social chamber (s)					2-way ANOVA		Interaction :: P = 0.0412, n.s., DF = 4 Day :: P < 0.0001, ****, DF = 4 Genotype :: P = 0.0600, n.s., DF = 1
								Sidak's multiple comparison test	Day 1	WT vs cKO	P = 0.5334 , n.s.
									Day 2	WT vs cKO	P = 0.8913 , n.s.
									Day 3	WT vs cKO	P = 0.8477 , n.s.
									Day 4	WT vs cKO	P = 0.6533 , n.s.
									Day 5	WT vs cKO	P = 0.0184 , *
			Time in emtpy chamber (s)					2-way ANOVA		Interaction :: P = 0.0430, *, DF = 4 Day :: P = 0.0016, **, DF = 4 Genotype :: P = 0.2666, n.s., DF = 1
								Sidak's multiple comparison test	Day 1	WT vs cKO	P = 0.743 , n.s.
									Day 2	WT vs cKO	P = 0.933 , n.s.
									Day 3	WT vs cKO	P = 0.8785 , n.s.
									Day 4	WT vs cKO	P = 0.1316 , n.s.
									Day 5	WT vs cKO	P = 0.2847 , n.s.
	D	Y-Maze Test	Correct per trial (%)	M	2-3M	WT, cKO	21, 22	2-way ANOVA		Interaction :: P = 0.0596, n.s., DF = 3 Trial :: P < 0.0001, ****, DF = 3 Genotype :: P = 0.2135, n.s., DF = 1
								Sidak's multiple comparison test	Day 1, Trial 1	WT vs cKO	P = 0.5400, n.s.
									Day 1, Trial 2	WT vs cKO	P = 0.0500, *
									Day 1, Trial 3	WT vs cKO	P = 0.9913, n.s.
									Day 1, Trial 4	WT vs cKO	P > 0.9999, n.s.
								WT = 89.52 ± 4.28	Mann-Whitney test	WT vs cKO	P = 0.6575, n.s.	U=214.5	Two-tailed	P = 0.0008, ***	P < 0.0001, ****
								cKO = 87.27 ± 4.471						P = 0.0001, ***	P < 0.0001, ****
							17, 19	2-way ANOVA		Interaction :: P = 0.1262, n.s., DF = 3 Trial :: P < 0.0001, ****, DF = 3 Genotype :: P = 0.0474, *, DF = 1
								Sidak's multiple comparison test	Day 2, Trial 1	WT vs cKO	P = 0.5400, n.s.
									Day 2, Trial 2	WT vs cKO	P = 0.0500, *
									Day 2, Trial 3	WT vs cKO	P = 0.9913, n.s.
									Day 2, Trial 4	WT vs cKO	P > 0.9999, n.s.
	E	Morris-Water Maze	Latency to escape (s)	M	3M	WT, cKO	19, 18	2-way ANOVA		Interaction :: P = 0.9954, n.s., DF = 5 Day :: P < 0.0001, ****, DF = 5 Genotype :: P = 0.8886, n.s., DF = 1
								Sidak's multiple comparison test	Day 1	WT vs cKO	P > 0.9999 , n.s.
									Day 2	WT vs cKO	P > 0.9999 , n.s.
									Day 3	WT vs cKO	P > 0.9999 , n.s.
									Day 4	WT vs cKO	P = 0.9999 , n.s.
									Day 5	WT vs cKO	P = 0.9986 , n.s.
									Day 6	WT vs cKO	P > 0.9999 , n.s.
								2-way ANOVA		Interaction :: P = 0.3109, n.s., DF = 2 Day :: P < 0.0001, ****, DF = 2 Genotype :: P = 0.0138, *, DF = 1
								Sidak's multiple comparison test	Day 8	WT vs cKO	P = 0.4103 , n.s.
									Day 9	WT vs cKO	P = 0.0109 , *
									Day 10	WT vs cKO	P = 0.3013 , n.s.
			Time in quadrant (s)					2-way ANOVA		Interaction :: P = 0.8969, n.s., DF = 3 Day :: P < 0.0001, ****, DF = 3 Genotype :: P > 0.9999, n.s., DF = 1
								Sidak's multiple comparison test	Learning, Opposite	WT vs cKO	P = 0.9999 , n.s.
									Learning, Left	WT vs cKO	P = 0.9323 , n.s.
									Learning, Right	WT vs cKO	P > 0.9999 , n.s.
									Learning, Target	WT vs cKO	P = 0.9705 , n.s.
								2-way ANOVA		Interaction :: P < 0.0001, ****., DF = 3 Day :: P < 0.0001, ****, DF = 3 Genotype :: P = 0.0064, **, DF = 1
								Sidak's multiple comparison test	Reversal, Opposite	WT vs cKO	P = 0.9455 , n.s.
									Reversal, Left	WT vs cKO	P = 0.7298 , n.s.
									Reversal, Right	WT vs cKO	P = 0.0162 , *
									Reversal, Target	WT vs cKO	P < 0.0001 , ****
			Visit Platform :: Learning (count)					WT = 4.368 ± 0.7693	Unpaired Student's t-test	WT vs cKO	P = 0.207 , n.s.	F(18) = 1.417	Two-tailed
								cKO = 3.056 ± 0.6641
			Visit Latency :: Learning (s)					WT = 15.85 ± 4.2	Mann-Whitney test	WT vs cKO	P = 0.2177, n.s.	U = 130	Two-tailed	P = 0.0036, **	P = 0.0002, ***
								cKO = 24 ± 5.208						P = 0.1428, n.s.	P = 0.0029, **
			Visit Platform :: Reversal (count)					WT = 4.632 ± 0.672	Unpaired Student's t-test	WT vs cKO	P = 0.0317, *	F(18)=2.676	Two-tailed
								cKO = 2.833 ± 0.422
			Visit Latency :: Reversal (s)					WT = 5.932 ± 1.506	Mann-Whitney test	WT vs cKO	P = 0.0007, ***	U = 58.5	Two-tailed	P = 0.0003, ***	P = 0.1211, n.s.
								cKO = 19.8 ± 4.094						P = 0.0011, **	P = 0.0079, **
6	A	3-chamber test, O vs S1 with 20mg/kg DCS treatment	Sniffing time (sec)	M	2-3M	WT-V, WT-D	13, 14	2-way ANOVA		Interaction :: P = 0.0995, n.s., DF=1 O vs S1 :: P < 0.0001, ****, DF = 1 Genotype :: P = 0.6905, n.s., DF = 1
								Sidak's multiple comparison test	WT-V	O vs S1	P = 0.0090, **
									WT-D	O vs S1	P < 0.0001, ****
								2-way ANOVA		Interaction :: P = 0.9858, n.s., DF=1 O vs S1 :: P < 0.0001, ****, DF = 1 Genotype :: P = 0.3009, n.s., DF = 1
								Sidak's multiple comparison test	cKO-V	O vs S1	P = 0.0023, **
									cKO-D	O vs S1	P = 0.0021, **
		3-chamber test, S1 vs S2 with 20mg/kg DCS treatment	Sniffing time (sec)	M	2-3M	cKO-V, cKO-D	14, 14	2-way ANOVA		Interaction :: P = 0.8552, n.s., DF=1 S2 vs S1 :: P = 0.0002, ***, DF = 1 Genotype :: P = 0.2285, n.s., DF = 1
								Sidak's multiple comparison test	WT-V	S2 vs S1	P = 0.0112, *
									WT-D	S2 vs S1	P = 0.0060, **
								2-way ANOVA		Interaction :: P = 0.3251, n.s., DF=1 S2 vs S1 :: P = 0.0185, *, DF = 1 Genotype :: P = 0.7359, n.s., DF = 1
								Sidak's multiple comparison test	cKO-V	S2 vs S1	P = 0.5171, n.s.
									cKO-D	S2 vs S1	P = 0.0352, *
	C	3-chamber test, O vs S1	Sniffing time (sec)	M	2-3M	CA3-eGFP, CA3-Cre	13, 11	2-way ANOVA		Interaction :: P = 0.2461, n.s., DF = 1 O vs S1 :: P < 0.0001, ****, DF = 1 CA3-eGFP vs CA3-Cre :: P = 0.2013, n.s., DF = 1
								Sidak's multiple comparison test	CA3-eGFP	O vs S1	P < 0.0001, ****
									CA3-Cre	O vs S1	P < 0.0001, ****
		3-chamber test, S2 vs S1						2-way ANOVA		Interaction :: P = 0.3518, n.s., DF = 1 O vs S1 :: P = 0.0038, ***, DF = 1 CA3-eGFP vs CA3-Cre :: P = 0.5390, n.s., DF = 1
								Sidak's multiple comparison test	CA3-eGFP	S2 vs S1	P = 0.0088, **
									CA3-Cre	S2 vs S1	P = 0.2617, n.s.
		3-chamber test, O vs S1	Sniffing time (sec)	M	3M	CA1-eGFP, CA1-Cre	15, 14	2-way ANOVA		Interaction :: P = 0.5804, n.s., DF = 1 O vs S1 :: P < 0.0001, ****, DF = 1 CA1-eGFP vs CA1-Cre :: P = 0.2678, n.s., DF = 1
								Sidak's multiple comparison test	CA1-eGFP	O vs S1	P < 0.0001, ****
									CA1-Cre	O vs S1	P < 0.0001, ****
		3-chamber test, S2 vs S1						2-way ANOVA		Interaction :: P = 0.6494, n.s., DF = 1 O vs S1 :: P = 0.0003, ***, DF = 1 CA1-eGFP vs CA1-Cre :: P = 0.9655, n.s., DF = 1
								Sidak's multiple comparison test	CA1-eGFP	S2 vs S1	P = 0.0042, **
									CA1-Cre	S2 vs S1	P = 0.0335, *
	D	Water-based Y-Maze test ,Learning session	Correct per trial (%)	M	3M	CA3-eGFP, CA3-Cre	9, 7	2-way ANOVA		Interaction :: P = 0.5326, n.s., DF = 1 Trial :: P = 0.0839, n.s., DF = 1 CA3-eGFP vs CA3-Cre :: P = 0.1853, n.s. *, DF = 1
								Sidak's multiple comparison test	Trial #1	CA3-eGFP vs CA3-Cre	P = 0.7969 , ns
									Trial #2	CA3-eGFP vs CA3-Cre	P = 0.4378 , ns
									Trial #3	CA3-eGFP vs CA3-Cre	P = 0.5133 , ns
									Trial #4	CA3-eGFP vs CA3-Cre	P > 0.9999 , ns
		Water-based Y-Maze test ,Reversal session					6, 3	2-way ANOVA		Interaction :: P = 0.0500, n.s., DF = 3 Trial :: P < 0.0001, ****., DF = 3 CA3-eGFP vs CA3-Cre :: P = 0.0058, **. *, DF = 1
								Sidak's multiple comparison test	Trial #1	CA3-eGFP vs CA3-Cre	P = 0.9873 , ns
									Trial #2	CA3-eGFP vs CA3-Cre	P = 0.2136 , ns
									Trial #3	CA3-eGFP vs CA3-Cre	P = 0.0011 , **
									Trial #4	CA3-eGFP vs CA3-Cre	P = 0.0187 , *
		Water-based Y-Maze test ,Learning session	Correct per trial (%)	M	3M	CA1-eGFP, CA1-Cre	16, 17	2-way ANOVA		Interaction :: P = 0.1692, n.s., DF = 3 Trial :: P = 0.0004, **., DF = 3 CA1-eGFP vs CA1-Cre :: P = 0.1032, n.s. *, DF = 1
								Sidak's multiple comparison test	Trial #1	CA1-eGFP vs CA1-Cre	P = 0.9672 , ns
									Trial #2	CA1-eGFP vs CA1-Cre	P = 0.7331 , ns
									Trial #3	CA1-eGFP vs CA1-Cre	P = 0.226 , ns
									Trial #4	CA1-eGFP vs CA1-Cre	P = 0.2143 , ns
		Water-based Y-Maze test ,Reversal session					13, 11	2-way ANOVA		Interaction :: P = 0.0559, n.s., DF = 3 Trial :: P < 0.0001, ****., DF = 3 CA1-eGFP vs CA1-Cre :: P = 0.4641, n.s. *, DF = 1
								Sidak's multiple comparison test	Trial #1	CA1-eGFP vs CA1-Cre	P = 0.9451 , ns
									Trial #2	CA1-eGFP vs CA1-Cre	P = 0.1255 , ns
									Trial #3	CA1-eGFP vs CA1-Cre	P = 0.9792 , ns
									Trial #4	CA1-eGFP vs CA1-Cre	P = 0.996 , ns
	F	3-chamber test	Sniffing time (s)	M	3M	shCtrl, shGluN1	13, 11	2-way ANOVA		Interaction :: P = 0.4157, n.s., DF = 1 O vs S1 :: P <0.0001, ****, DF = 1 shCtrl vs shGluN1 :: P = 0.0283, *, DF = 1
								Sidak's multiple comparison test	shCtrl	S1 vs O	P = 0.0001 , ***
									shGluN1	S1 vs O	P < 0.0001 , ****
								2-way ANOVA		Interaction :: P = 0.0258, *, DF = 1 S2 vs S1 :: P = 0.0241, *, DF = 1 shCtrl vs shGluN1 :: P = 0.6558, n.s., DF = 1
								Sidak's multiple comparison test	shCtrl	S1 vs S2	P = 0.0035 , **
									shGluN1	S1 vs S2	P = 0.9997 , n.s.
	G	Y-Maze Test	Correct per trial (%)	M	2-3M	shCtrl, shGluN1	17, 19	2-way ANOVA		Interaction :: P = 0.9898, n.s., DF = 3 Trial :: P = 0.0004, n.s., DF = 3 shCtrl vs shGluN1 :: P = 0.3877, n.s., DF = 1
								Sidak's multiple comparison test	Day 1, Trial 1	shCtrl vs shGluN1	P = 0.9714 , n.s.
									Day 1, Trial 2	shCtrl vs shGluN1	P = 0.8817 , n.s.
									Day 1, Trial 3	shCtrl vs shGluN1	P = 0.9792 , n.s.
									Day 1, Trial 4	shCtrl vs shGluN1	P = 0.988 , n.s.
								WT = 88.24 ± 3.455	Mann-Whitney test	shCtrl vs shGluN1	P = 0.7464, n.s.	U=152	Two-tailed		P = 0.0005, ***
								shGluN1 = 81.05 ± 6.574						P = 0.0006, ***	P < 0.0001, ****
							15, 15	2-way ANOVA		Interaction :: P = 0.0019, **, DF = 3 Trial :: P < 0.0001, ****, DF = 3 shCtrl vs shGluN1 :: P = 0.0065, **, DF = 1
								Sidak's multiple comparison test	Day 2, Trial 1	shCtrl vs shGluN1	P = 0.9998 , n.s.
									Day 2, Trial 2	shCtrl vs shGluN1	P = 0.2592 , n.s.
									Day 2, Trial 3	shCtrl vs shGluN1	P = 0.0006 , ***
									Day 2, Trial 4	shCtrl vs shGluN1	P = 0.0069 , **
	H	Western Blot Normalized by a-tub	HC, Lysate, GluN1 (a.u.)	M	DOI = 56, Prep 3wks after	shCtrl, shGluN1	3, 3	shGluN1 = 0.357 ± 0.1176	One sample t-test	shCtrl vs shGluN1	P = 0.0319, *	t(2) = 5.465	Two-tailed
Figure 1- Supp 1	D	Body weight	Body weight (g)	M+F	P2-21	WT, gKO	37, 10	2-way ANOVA		Interaction :: P < 0.0001, ****., DF = 19 Day :: P < 0.0001, ****, DF = 19 Genotype :: P < 0.0001, ****, DF = 1
								Sidak's multiple comparison test	postnatal day 2	WT vs gKO	P > 0.9999 , n.s.
									postnatal day 3	WT vs gKO	P = 0.9903 , n.s.
									postnatal day 4	WT vs gKO	P = 0.7983 , n.s.
									postnatal day 5	WT vs gKO	P = 0.3165 , n.s.
									postnatal day 6	WT vs gKO	P = 0.2182 , n.s.
									postnatal day 7	WT vs gKO	P = 0.0208 , *
									postnatal day 8	WT vs gKO	P = 0.0032 , **
									postnatal day 9	WT vs gKO	P = 0.0007 , ***
									postnatal day 10	WT vs gKO	P = 0.0002 , ***
									postnatal day 11	WT vs gKO	P < 0.0001 , ****
									postnatal day 12	WT vs gKO	P < 0.0001 , ****
									postnatal day 13	WT vs gKO	P < 0.0001 , ****
									postnatal day 14	WT vs gKO	P < 0.0001 , ****
									postnatal day 15	WT vs gKO	P < 0.0001 , ****
									postnatal day 16	WT vs gKO	P < 0.0001 , ****
									postnatal day 17	WT vs gKO	P < 0.0001 , ****
									postnatal day 18	WT vs gKO	P < 0.0001 , ****
									postnatal day 19	WT vs gKO	P < 0.0001 , ****
									postnatal day 20	WT vs gKO	P < 0.0001 , ****
									postnatal day 21	WT vs gKO	P < 0.0001 , ****
						WT, cKO	22, 23	2-way ANOVA		Interaction :: P < 0.0001, ****., DF = 19 Day :: P < 0.0001, ****, DF = 19 Genotype :: P = 0.0602, n.s., DF = 1
								Sidak's multiple comparison test	postnatal day 2	WT vs cKO	P > 0.9999 , n.s.
									postnatal day 3	WT vs cKO	P > 0.9999 , n.s.
									postnatal day 4	WT vs cKO	P > 0.9999 , n.s.
									postnatal day 5	WT vs cKO	P > 0.9999 , n.s.
									postnatal day 6	WT vs cKO	P = 0.9998 , n.s.
									postnatal day 7	WT vs cKO	P = 0.9953 , n.s.
									postnatal day 8	WT vs cKO	P = 0.9954 , n.s.
									postnatal day 9	WT vs cKO	P = 0.9967 , n.s.
									postnatal day 10	WT vs cKO	P = 0.8992 , n.s.
									postnatal day 11	WT vs cKO	P = 0.5156 , n.s.
									postnatal day 12	WT vs cKO	P = 0.4337 , n.s.
									postnatal day 13	WT vs cKO	P = 0.3649 , n.s.
									postnatal day 14	WT vs cKO	P = 0.4135 , n.s.
									postnatal day 15	WT vs cKO	P = 0.5306 , n.s.
									postnatal day 16	WT vs cKO	P = 0.5718 , n.s.
									postnatal day 17	WT vs cKO	P = 0.6555 , n.s.
									postnatal day 18	WT vs cKO	P = 0.5234 , n.s.
									postnatal day 19	WT vs cKO	P = 0.2262 , n.s.
									postnatal day 20	WT vs cKO	P = 0.1542 , n.s.
									postnatal day 21	WT vs cKO	P = 0.0135 , *
Figure 5- Supp 1	A	LABORAS	Distance Moved (m)	M	2M	WT, cKO	10, 15	2-way ANOVA		Interaction :: P < 0.0001, ****., DF = 71 Day :: P < 0.0001, ****, DF = 71 Genotype :: P = 0.2401, n.s., DF = 1
								Sidak's multiple comparison test	1 hr	WT vs cKO	P > 0.9999 , n.s.
									2 hr	WT vs cKO	P > 0.9999 , n.s.
									3 hr	WT vs cKO	P = 0.9989 , n.s.
									4 hr	WT vs cKO	P = 0.9287 , n.s.
									5 hr	WT vs cKO	P > 0.9999 , n.s.
									6 hr	WT vs cKO	P = 0.8124 , n.s.
									7 hr	WT vs cKO	P = 0.6449 , n.s.
									8 hr	WT vs cKO	P > 0.9999 , n.s.
									9 hr	WT vs cKO	P > 0.9999 , n.s.
									10 hr	WT vs cKO	P > 0.9999 , n.s.
									11 hr	WT vs cKO	P = 0.6309 , n.s.
									12 hr	WT vs cKO	P > 0.9999 , n.s.
									13 hr	WT vs cKO	P > 0.9999 , n.s.
									14 hr	WT vs cKO	P > 0.9999 , n.s.
									15 hr	WT vs cKO	P = 0.9855 , n.s.
									16 hr	WT vs cKO	P > 0.9999 , n.s.
									17 hr	WT vs cKO	P > 0.9999 , n.s.
									18 hr	WT vs cKO	P > 0.9999 , n.s.
									19 hr	WT vs cKO	P > 0.9999 , n.s.
									20 hr	WT vs cKO	P > 0.9999 , n.s.
									21 hr	WT vs cKO	P > 0.9999 , n.s.
									22 hr	WT vs cKO	P > 0.9999 , n.s.
									23 hr	WT vs cKO	P > 0.9999 , n.s.
									24 hr	WT vs cKO	P > 0.9999 , n.s.
									25 hr	WT vs cKO	P > 0.9999 , n.s.
									26 hr	WT vs cKO	P > 0.9999 , n.s.
									27 hr	WT vs cKO	P = 0.8539 , n.s.
									28 hr	WT vs cKO	P = 0.9968 , n.s.
									29 hr	WT vs cKO	P = 0.7743 , n.s.
									30 hr	WT vs cKO	P > 0.9999 , n.s.
									31 hr	WT vs cKO	P > 0.9999 , n.s.
									32 hr	WT vs cKO	P = 0.0119 , *
									33 hr	WT vs cKO	P > 0.9999 , n.s.
									34 hr	WT vs cKO	P > 0.9999 , n.s.
									35 hr	WT vs cKO	P = 0.9636 , n.s.
									36 hr	WT vs cKO	P > 0.9999 , n.s.
									37 hr	WT vs cKO	P > 0.9999 , n.s.
									38 hr	WT vs cKO	P > 0.9999 , n.s.
									39 hr	WT vs cKO	P > 0.9999 , n.s.
									40 hr	WT vs cKO	P > 0.9999 , n.s.
									41 hr	WT vs cKO	P > 0.9999 , n.s.
									42 hr	WT vs cKO	P > 0.9999 , n.s.
									43 hr	WT vs cKO	P > 0.9999 , n.s.
									44 hr	WT vs cKO	P > 0.9999 , n.s.
									45 hr	WT vs cKO	P > 0.9999 , n.s.
									46 hr	WT vs cKO	P > 0.9999 , n.s.
									47 hr	WT vs cKO	P > 0.9999 , n.s.
									48 hr	WT vs cKO	P > 0.9999 , n.s.
									49 hr	WT vs cKO	P > 0.9999 , n.s.
									50 hr	WT vs cKO	P > 0.9999 , n.s.
									51 hr	WT vs cKO	P = 0.9376 , n.s.
									52 hr	WT vs cKO	P = 0.0555 , n.s.
									53 hr	WT vs cKO	P = 0.0012 , **
									54 hr	WT vs cKO	P > 0.9999 , n.s.
									55 hr	WT vs cKO	P > 0.9999 , n.s.
									56 hr	WT vs cKO	P = 0.9998 , n.s.
									57 hr	WT vs cKO	P > 0.9999 , n.s.
									58 hr	WT vs cKO	P = 0.8721 , n.s.
									59 hr	WT vs cKO	P > 0.9999 , n.s.
									60 hr	WT vs cKO	P > 0.9999 , n.s.
									61 hr	WT vs cKO	P > 0.9999 , n.s.
									62 hr	WT vs cKO	P > 0.9999 , n.s.
									63 hr	WT vs cKO	P > 0.9999 , n.s.
									64 hr	WT vs cKO	P > 0.9999 , n.s.
									65 hr	WT vs cKO	P > 0.9999 , n.s.
									66 hr	WT vs cKO	P > 0.9999 , n.s.
									67 hr	WT vs cKO	P > 0.9999 , n.s.
									68 hr	WT vs cKO	P > 0.9999 , n.s.
									69 hr	WT vs cKO	P > 0.9999 , n.s.
									70 hr	WT vs cKO	P > 0.9999 , n.s.
									71 hr	WT vs cKO	P > 0.9999 , n.s.
									72 hr	WT vs cKO	P > 0.9999 , n.s.
	B	ROTAROD	Latency to fall (s)	M	2M	WT, cKO	12, 13	2-way ANOVA		Interaction :: P = 0.4811, n.s. Day :: P < 0.0001, **** Genotype :: P = 0.4138, n.s.
								Sidak's multiple comparison test	Day 1	WT vs cKO	P = 0.8733 , n.s.
									Day 2	WT vs cKO	P = 0.6216 , n.s.
									Day 3	WT vs cKO	P = 0.8517 , n.s.
									Day 4	WT vs cKO	P = 0.9999 , n.s.
									Day 5	WT vs cKO	P = 0.9967 , n.s.
	C	Open Field Test	Distance Moved (m)	M	2M	WT, cKO	23, 23	2-way ANOVA		Interaction :: P = 0.0600, n.s. Time :: P < 0.0001, **** Genotype :: P = 0.0323, *
								Sidak's multiple comparison test	0-10 min	WT vs cKO	P = 0.007 , **
									10-20 min	WT vs cKO	P = 0.0544 , n.s.
									20-30 min	WT vs cKO	P = 0.5288 , n.s.
									30-40 min	WT vs cKO	P = 0.9594 , n.s.
									40-50 min	WT vs cKO	P = 0.9895 , n.s.
									50-60 min	WT vs cKO	P = 0.9935 , n.s.
			Total distance moved (m)					WT = 20.161 ± 0.7908	Unpaired Student's t-test	WT vs cKO	P = 0.0323, *	t(28) = 2.252	Two-tailed
								cKO = 22.681 ± 0.7919
			Time in center (s)					2-way ANOVA		Interaction :: P = 0.8086, n.s. Time :: P < 0.0001, **** Genotype :: P = 0.2084, n.s.
								Sidak's multiple comparison test	0-10 min	WT vs cKO	P = 0.9896 , n.s.
									10-20 min	WT vs cKO	P = 0.5888 , n.s.
									20-30 min	WT vs cKO	P = 0.5918 , n.s.
									30-40 min	WT vs cKO	P = 0.9792 , n.s.
									40-50 min	WT vs cKO	P > 0.9999 , n.s.
									50-60 min	WT vs cKO	P = 0.9604 , n.s.
			Total time in center (s)					WT = 404.1 ± 34.55	Unpaired Student's t-test	WT vs cKO	P = 0.2084, n.s.	t(28) = 1.288	Two-tailed
								cKO = 466.9 ± 34.36
	D	Light-dark box	% Time in Light (%)	M	2M	WT, cKO	17, 19	WT = 17.25 ± 2.017	Mann-Whitney test	WT vs cKO	P = 0.4904, n.s.	U = 139	Two-tailed
								cKO = 20.47 ± 2.523						P = 0.0198, *
	E	Elevated Plus Maze	Time in closed arms (s)	M	2M	WT, cKO	16, 16	WT = 138.7 ± 13.02	Unpaired Student's t-test	WT vs cKO	P = 0.0315, *	t(32) = 2.249	Two-tailed
								cKO = 105.7 ± 7.63
			Time in open arms (s)					WT = 71.92 ± 13.08	Mann-Whitney test	WT vs cKO	P = 0.0039, **	U = 62	Two-tailed	p = 0.0231, *	P = 0.0205, *
								cKO = 130.1 ± 14.96
	F	Grooming	Time (s)	M	2M	WT, cKO	15, 14	WT = 40 ± 4.3	Unpaired Student's t-test	WT vs cKO	P = 0.0805, n.s.	t(29) = 1.811	Two-tailed
								cKO = 55 ± 6.5
		Rearing	Time (s)	M	2M	WT, cKO	15, 16	WT = 107 ± 12	Mann-Whitney test	WT vs cKO	P = 0.6056, n.s.	U = 106.5	Two-tailed	p = 0.0204, *
								cKO = 96 ± 8.2							P = 0.0063, **
	G	Pre-Pulse Inhibition	% PPI	M	3M	WT, cKO	9, 13	2-way ANOVA		Interaction :: P = 0.6170, n.s. dB :: P < 0.0001, **** Genotype :: P = 0.3047, n.s.
								Sidak's multiple comparison test	70 dB	WT vs cKO	P = 0.9325 , n.s.
									75 dB	WT vs cKO	P = 0.4249 , n.s.
									80 dB	WT vs cKO	P = 0.861 , n.s.
									85 dB	WT vs cKO	P = 0.9963 , n.s.
									90 dB	WT vs cKO	P > 0.9999 , n.s.
